# Supplementary material
Source: Research Square preprint supplement (doi:10.21203/rs.3.rs-9185479/v1)
Supplement: Supplementary file 1 [file 4de0292ed830c84fc325bda3.xlsx]

## Sheet: fig.2
Fig.2(c)-trian				Fig.2(c)-val				Fig.2(c),(d)-test				Fig.2(c)(d)-center B				Fig.2(c)(d)-center C
ID	duration	event	scores	ID	duration	event	scores	ID	duration	event	scores	ID	duration	event	scores	ID	duration	event	scores
0	38.7333	0	-4.42963	1	112.433	0	-7.04873	0	34.6	0	-3.64465	0	48	0	[-3.4511292]	0	53	0	[-2.258958]
1	82.9667	0	-4.40979	2	0.3	0	-7.03087	1	30.6333	0	-3.56949	1	67	0	[-3.406428]	1	42	0	[-2.235696]
2	73.7667	0	-4.30671	3	26.8333	0	-7.02957	2	85.8333	0	-3.53455	2	81	0	[-3.3865285]	2	44	0	[-2.2164285]
3	51.4333	0	-4.3035	4	119.967	0	-7.00421	3	25.9	0	-3.52355	3	47	0	[-3.3853362]	3	40	0	[-2.1723692]
4	72.5667	0	-4.29643	5	48.0667	0	-7.00383	4	62.5333	0	-3.50124	4	86	0	[-3.3830893]	4	66	0	[-2.155975]
5	50.1	0	-4.28377	6	64.6	0	-6.99224	5	116.067	0	-3.48208	5	36	0	[-3.3666096]	5	9	0	[-2.1074235]
6	122.067	0	-4.26831	7	2.53333	0	-6.98209	6	35.5	0	-3.47629	6	67	0	[-3.3489082]	6	79	0	[-2.0990443]
7	96.8	0	-4.26504	8	36.5667	0	-6.97952	7	39.2667	0	-3.45981	7	57	0	[-3.3446667]	7	37	0	[-1.9756982]
8	82.1667	0	-4.25715	9	3.53333	0	-6.96775	8	52.4	0	-3.45247	8	40	0	[-3.3418787]	8	48	0	[-1.9704187]
9	49.2333	0	-4.24894	10	63.0333	0	-6.96723	9	81.2	0	-3.43039	9	25	0	[-3.3382065]	9	36	0	[-1.9697838]
10	87.3333	0	-4.23013	11	84.9333	0	-6.96529	10	35.7333	0	-3.40882	10	29	0	[-3.338006]	10	78	0	[-1.9557534]
11	74.3	0	-4.2266	12	59.2333	0	-6.96163	11	50.6667	0	-3.4011	11	50	0	[-3.3373644]	11	31	0	[-1.9351249]
12	25	0	-4.22204	13	107.967	0	-6.95912	12	0.333333	0	-3.39402	12	74	0	[-3.3307512]	12	32	0	[-1.8994076]
13	51.0333	0	-4.2129	14	86.4	0	-6.95816	13	52.7333	0	-3.39196	13	92	0	[-3.3299932]	13	54	0	[-1.8976067]
14	105.867	0	-4.20832	15	7.96667	0	-6.95753	14	33.6	0	-3.37647	14	15	0	[-3.328567]	14	44	0	[-1.8866673]
15	62.7333	0	-4.20243	16	20.5667	0	-6.95099	15	2.9	0	-3.37101	15	65	0	[-3.328408]	15	28	1	[-1.8836281]
16	89.8	0	-4.20168	17	50.2	0	-6.95073	16	3.76667	0	-3.36786	16	80	0	[-3.3266323]	16	61	0	[-1.8777386]
17	35.8	0	-4.2006	18	48.2	0	-6.94226	17	61.4333	0	-3.36728	17	17	0	[-3.326277]	17	53	0	[-1.8607]
18	38	0	-4.19919	19	132.7	0	-6.93384	18	29.2	0	-3.35098	18	57	0	[-3.3260996]	18	64	0	[-1.8386331]
19	48.0333	0	-4.19804	20	56.2667	0	-6.93048	19	1.56667	0	-3.33759	19	73	0	[-3.3242655]	19	50	0	[-1.8188088]
20	35.7	0	-4.19625	21	36.9	0	-6.92942	20	48.8	0	-3.32576	20	59	0	[-3.3237827]	20	66	0	[-1.8062449]
21	76.0667	0	-4.1885	22	105.267	0	-6.92592	21	24	0	-3.31644	21	97	0	[-3.3235056]	21	47	0	[-1.8053267]
22	83.8	0	-4.18798	23	1.66667	0	-6.91136	22	59.1	0	-3.30713	22	49	0	[-3.321084]	22	46	0	[-1.8050344]
23	94.5333	0	-4.17928	24	55.6	0	-6.90858	23	61.3	0	-3.29732	23	108	0	[-3.3160083]	23	57	0	[-1.80285]
24	89.7667	1	-4.17676	25	3.46667	0	-6.90818	24	69.9333	0	-3.28829	24	39	0	[-3.3153112]	24	43	0	[-1.7813456]
25	60.3333	0	-4.17476	26	107.333	0	-6.9063	25	81.3667	0	-3.27548	25	33	0	[-3.3120046]	25	55	0	[-1.7734151]
26	91.2333	0	-4.17117	27	26.6667	0	-6.90111	26	23.5333	0	-3.27445	26	12	0	[-3.3057785]	26	49	0	[-1.7591977]
27	88.0667	0	-4.16756	28	50.8667	0	-6.89842	27	75.3	0	-3.27233	27	4	0	[-3.3055377]	27	51	0	[-1.7462986]
28	66.3333	0	-4.15484	29	108.767	0	-6.89834	28	51.9	0	-3.27184	28	60	0	[-3.3044446]	28	64	0	[-1.7257189]
29	72.4333	0	-4.14541	30	37.3333	0	-6.8977	29	142.133	0	-3.26977	29	42	0	[-3.3030992]	29	43	0	[-1.7157953]
30	75.9	0	-4.13554	31	37.0667	0	-6.89025	30	35.2333	0	-3.26416	30	61	0	[-3.2995772]	30	34	0	[-1.7140191]
31	60.6667	0	-4.12701	32	37.3333	0	-6.88895	31	102.033	0	-3.25754	31	71	0	[-3.299294]	31	68	0	[-1.68822]
32	50.6667	0	-4.11946	33	25.4	0	-6.88835	32	36.1333	0	-3.24344	32	42	0	[-3.2963665]	32	50	0	[-1.6822114]
33	73.7667	0	-4.1185	34	27.4667	0	-6.88833	33	5.46667	0	-3.22327	33	52	0	[-3.2947094]	33	78	0	[-1.6752079]
34	61.7333	0	-4.11248	35	133.967	0	-6.88612	34	82.3667	0	-3.21941	34	36	0	[-3.2842276]	34	63	0	[-1.6691949]
35	87.8333	0	-4.09627	36	106.667	0	-6.8851	35	25.8333	0	-3.21205	35	60	0	[-3.2826831]	35	52	0	[-1.6630964]
36	51.7333	0	-4.09371	37	92.8	0	-6.88148	36	27.7	0	-3.1987	36	54	0	[-3.2658708]	36	28	0	[-1.6507678]
37	1.33333	0	-4.08861	38	33.1	0	-6.88147	37	79.3667	0	-3.18358	37	38	0	[-3.2524927]	37	51	0	[-1.6293662]
38	34.0333	0	-4.07513	39	55	0	-6.8768	38	35.4667	0	-3.17103	38	31	0	[-3.2481482]	38	42	0	[-1.6168451]
39	58.8333	0	-4.06267	40	113.5	0	-6.87015	39	59.0333	0	-3.16092	39	49	0	[-3.2471182]	39	42	0	[-1.61404]
40	25.9	0	-4.03788	41	34.7333	0	-6.86842	40	71.9667	0	-3.15396	40	56	0	[-3.2274215]	40	38	1	[-1.6139702]
41	89.1	0	-4.03091	42	95.1	0	-6.86709	41	31.9333	0	-3.14872	41	78	0	[-3.1904078]	41	48	0	[-1.6078032]
42	77.8667	0	-4.03068	43	79.9333	0	-6.86275	42	36.6333	0	-3.13771	42	51	0	[-3.1871278]	42	56	0	[-1.6046402]
43	36.4	0	-4.02437	44	60.1333	0	-6.85599	43	130.233	0	-3.13683	43	64	0	[-3.1824586]	43	55	0	[-1.6019502]
44	49.6333	0	-4.00618	45	41.6	0	-6.85405	44	37.2	0	-3.13502	44	39	0	[-3.177181]	44	79	0	[-1.5936877]
45	34.4	0	-3.99767	46	2.56667	0	-6.853	45	4.46667	0	-3.1345	45	57	0	[-3.1770232]	45	64	0	[-1.5900037]
46	4.33333	0	-3.99248	47	28.5	0	-6.85236	46	61.7	0	-3.12498	46	86	0	[-3.1758568]	46	43	0	[-1.5894418]
47	96.6333	0	-3.98328	48	52.8	0	-6.84943	47	3.23333	0	-3.12327	47	28	0	[-3.1757298]	47	38	1	[-1.5864875]
48	35.7	0	-3.98167	49	114.667	0	-6.84743	48	61.8667	0	-3.11611	48	68	0	[-3.169038]	48	41	0	[-1.5849233]
49	35.9667	0	-3.97603	50	35.5333	0	-6.84478	49	3.73333	0	-3.1158	49	59	0	[-3.162148]	49	82	0	[-1.5724803]
50	107.5	0	-3.97519	51	147.4	0	-6.83448	50	181.333	0	-3.0983	50	34	0	[-3.1613817]	50	60	0	[-1.5566587]
51	57.7333	0	-3.97356	52	111.733	0	-6.83317	51	54.8333	0	-3.09666	51	39	0	[-3.160068]	51	23	0	[-1.5504596]
52	39.1333	0	-3.97186	53	61.8667	0	-6.83049	52	5.76667	0	-3.09377	52	49	0	[-3.1598842]	52	49	0	[-1.4743913]
53	1.86667	0	-3.96885	54	144.8	0	-6.82745	53	24.3333	0	-3.07914	53	93	0	[-3.1598084]	53	41	0	[-1.4615927]
54	88.3	0	-3.96743	55	25.5333	0	-6.82702	54	133.133	0	-3.0736	54	66	0	[-3.1594586]	54	50	0	[-1.4566455]
55	86.5333	0	-3.95724	56	41.8333	0	-6.82429	55	4.76667	0	-3.06035	55	65	0	[-3.1562126]	55	35	1	[-1.4421687]
56	62.8	0	-3.95341	57	25.8667	0	-6.82374	56	61.9	0	-3.05247	56	53	0	[-3.1536512]	56	54	0	[-1.4357984]
57	35.8667	0	-3.94687	58	96.1667	0	-6.82229	57	112.567	0	-3.05206	57	47	0	[-3.1527894]	57	56	0	[-1.4324522]
58	3.76667	0	-3.94465	59	107.8	0	-6.81489	58	80.6	0	-3.03276	58	70	0	[-3.1521535]	58	53	0	[-1.4289844]
59	36	0	-3.94265	60	117.933	0	-6.81127	59	4.46667	0	-3.02769	59	31	0	[-3.151714]	59	35	0	[-1.4249578]
60	35.2667	0	-3.9421	61	4.16667	0	-6.80454	60	33.9333	0	-3.01541	60	81	0	[-3.1513941]	60	33	0	[-1.4204376]
61	51.6333	0	-3.94093	62	37.6	0	-6.80453	61	3.73333	0	-3.01437	61	38	0	[-3.1472118]	61	57	0	[-1.4200943]
62	1.93333	0	-3.94065	63	69.8333	0	-6.79945	62	132.333	0	-3.01394	62	60	0	[-3.1468527]	62	41	0	[-1.3965247]
63	93.6	0	-3.93946	64	35.5	0	-6.79713	63	64.9	0	-3.00531	63	100	0	[-3.1451554]	63	49	0	[-1.3834188]
64	50.4	0	-3.93591	65	114.067	0	-6.7963	64	50.1333	0	-3.00478	64	50	0	[-3.1449206]	64	43	0	[-1.3824505]
65	97.5667	0	-3.93474	66	31.3333	0	-6.79572	65	84.7333	0	-3.00402	65	52	0	[-3.1446629]	65	38	0	[-1.3468142]
66	49.7333	0	-3.93229	67	69.8333	0	-6.79242	66	39.2667	0	-3.00333	66	48	0	[-3.1445339]	66	11	1	[-1.3371539]
67	58.5667	0	-3.92525	68	117.5	0	-6.79156	67	96.3667	0	-3.00204	67	57	0	[-3.1417418]	67	67	0	[-1.3296045]
68	75.5	0	-3.91592	69	94.1	0	-6.79045	68	34.3667	0	-2.99752	68	37	0	[-3.1406536]	68	32	0	[-1.3282346]
69	50.4333	0	-3.91581	70	49.4	0	-6.78871	69	4.23333	0	-2.99552	69	107	0	[-3.1388092]	69	53	0	[-1.3092227]
70	115.6	0	-3.91539	71	42.5333	0	-6.78528	70	97.6333	0	-2.99223	70	94	0	[-3.1374147]	70	61	0	[-1.3017251]
71	35.0333	0	-3.91063	72	136.367	0	-6.78381	71	83.1	0	-2.99123	71	53	0	[-3.135612]	71	46	0	[-1.2835879]
72	51.6	0	-3.9064	73	2.93333	0	-6.78133	72	99.6	0	-2.99073	72	39	0	[-3.1344607]	72	34	1	[-1.2604234]
73	62.1	0	-3.90581	74	2.3	0	-6.78113	73	105.067	0	-2.98869	73	63	0	[-3.1299706]	73	38	0	[-1.2538072]
74	26.2333	0	-3.90361	75	86.5	0	-6.78016	74	129	0	-2.98532	74	107	0	[-3.1292067]	74	44	0	[-1.231883]
75	97.9	0	-3.90299	76	35	0	-6.77602	75	106.7	0	-2.98103	75	29	0	[-3.128047]	75	54	0	[-1.1931756]
76	25	0	-3.89658	77	25.1667	0	-6.77245	76	49.6667	0	-2.97608	76	38	0	[-3.1279671]	76	61	0	[-1.1833227]
77	60.1333	0	-3.89138	78	117.567	0	-6.76844	77	35.1	0	-2.9754	77	48	0	[-3.1259112]	77	43	0	[-1.1825275]
78	11.4	0	-3.88968	79	47.8667	0	-6.76641	78	60.1333	0	-2.96906	78	37	0	[-3.125662]	78	41	0	[-1.1784748]
79	24.7	0	-3.88883	80	36.4333	0	-6.76639	79	122.867	0	-2.95426	79	53	0	[-3.1256032]	79	12	1	[-1.1548818]
80	111.567	0	-3.87151	81	93.8	0	-6.76597	80	36.8333	0	-2.94811	80	64	0	[-3.1255205]	80	66	0	[-1.1474392]
81	26.9667	0	-3.87052	82	48.8	0	-6.75984	81	15.1667	0	-2.93552	81	38	0	[-3.1251361]	81	53	0	[-1.1396784]
82	65.9333	0	-3.86742	83	108.367	0	-6.75585	82	86.1333	0	-2.93448	82	40	0	[-3.1239555]	82	25	1	[-1.1387801]
83	4.1	0	-3.86578	84	89.0333	0	-6.75318	83	106.633	0	-2.93432	83	61	0	[-3.1238897]	83	46	0	[-1.1222856]
84	161	0	-3.8569	85	65.5667	0	-6.75169	84	74.2333	0	-2.92859	84	51	0	[-3.123163]	84	11	0	[-1.1065693]
85	50.4333	0	-3.85437	86	75.6333	0	-6.751	85	39.0667	0	-2.92469	85	20	0	[-3.1186912]	85	80	0	[-1.0914657]
86	29.3667	0	-3.85328	87	61.0333	0	-6.75029	86	72.1	0	-2.9232	86	47	0	[-3.1186018]	86	46	1	[-1.0648241]
87	60.1667	0	-3.85186	88	62.0333	0	-6.74998	87	62.0333	0	-2.92308	87	28	0	[-3.1177309]	87	51	0	[-1.051161]
88	32.7	0	-3.8514	89	3.1	0	-6.74861	88	159.2	0	-2.91817	88	66	0	[-3.1174352]	88	38	0	[-1.0335692]
89	63.9333	0	-3.84935	90	50.3333	0	-6.74667	89	52.2	0	-2.91597	89	49	0	[-3.1166618]	89	39	1	[-1.0299145]
90	82.9	0	-3.84794	91	26.2	0	-6.74501	90	27.3333	0	-2.91556	90	42	0	[-3.1155498]	90	42	0	[-1.0235538]
91	25.2333	0	-3.84699	92	62.2333	0	-6.74304	91	93	0	-2.91011	91	57	0	[-3.1151106]	91	35	0	[-1.0219437]
92	2.36667	0	-3.84397	93	58.4667	0	-6.74187	92	26.8	1	-2.90668	92	60	0	[-3.1148396]	92	67	0	[-0.99655586]
93	102.9	0	-3.84134	94	81.0667	0	-6.73924	93	57.8333	0	-2.90049	93	67	0	[-3.113787]	93	55	0	[-0.9849865]
94	63	0	-3.84023	95	14.7333	0	-6.73923	94	80.7	0	-2.89957	94	44	0	[-3.1130946]	94	42	0	[-0.9660552]
95	27.4	1	-3.82699	96	105	0	-6.73589	95	37.8	0	-2.89601	95	60	0	[-3.1123934]	95	65	0	[-0.94539976]
96	35.7333	0	-3.82513	97	78.4	0	-6.73464	96	72.4333	0	-2.88766	96	27	0	[-3.1118803]	96	44	0	[-0.9256097]
97	66.3	0	-3.81799	98	35.7	0	-6.73426	97	10.7333	0	-2.88517	97	82	0	[-3.111328]	97	34	0	[-0.9202883]
98	156.8	0	-3.81499	99	38	0	-6.73315	98	31.6333	0	-2.88496	98	71	0	[-3.1106017]	98	81	0	[-0.9201416]
99	50.6333	0	-3.8142	100	48.7667	0	-6.73158	99	35.2667	0	-2.88196	99	56	0	[-3.1098506]	99	74	0	[-0.916958]
100	49.6	0	-3.81014	101	56.1333	0	-6.73111	100	53.8667	0	-2.8787	100	68	0	[-3.1082022]	100	47	0	[-0.91528744]
101	82.6667	0	-3.80733	102	35.2	0	-6.72946	101	54.7333	0	-2.8721	101	74	0	[-3.107196]	101	60	0	[-0.886604]
102	27.0667	0	-3.79827	103	79.7667	0	-6.7234	102	37.1667	0	-2.87152	102	30	0	[-3.1067388]	102	44	0	[-0.86709213]
103	31.3333	0	-3.7858	104	75.8333	0	-6.72002	103	29.8667	0	-2.86455	103	14	0	[-3.1063845]	103	54	0	[-0.8556735]
104	86.1333	0	-3.78576	105	87.7667	0	-6.71749	104	34.6	0	-2.86356	104	46	0	[-3.1053026]	104	65	0	[-0.85430205]
105	39.1333	1	-3.78129	106	70.5333	0	-6.71214	105	35.5	0	-2.86273	105	47	0	[-3.1026595]	105	43	0	[-0.84750766]
106	6.16667	0	-3.77957	107	67.8	0	-6.6998	106	3.5	0	-2.86225	106	12	0	[-3.1016781]	106	60	0	[-0.8469276]
107	29.7667	0	-3.77692	108	34.4333	0	-6.69912	107	36.6	0	-2.86118	107	71	0	[-3.0969675]	107	49	0	[-0.8466207]
108	85.6333	0	-3.77186	109	74.4333	1	-6.69787	108	61.1667	0	-2.85448	108	38	0	[-3.094889]	108	60	0	[-0.84246016]
109	33.5667	0	-3.76232	110	62.7667	0	-6.69325	109	60.5	0	-2.84843	109	73	0	[-3.0940468]	109	50	0	[-0.82746863]
110	35	0	-3.75935	111	52.8	0	-6.69074	110	20.8333	0	-2.84744	110	43	0	[-3.0926764]	110	54	0	[-0.8226172]
111	28.8333	0	-3.75704	112	25.2	0	-6.68793	111	67.5	0	-2.84386	111	27	0	[-3.0920384]	111	16	1	[-0.82171416]
112	55.3667	0	-3.75681	113	98.2	0	-6.68513	112	57.3	0	-2.83782	112	34	0	[-3.0913796]	112	45	0	[-0.8145773]
113	32.7333	0	-3.75515	114	36.6667	0	-6.68335	113	81.9	0	-2.83418	113	7	0	[-3.0907857]	113	81	0	[-0.80692565]
114	35.2	0	-3.75233	115	2.7	0	-6.68029	114	86.7333	0	-2.83359	114	31	0	[-3.090546]	114	78	0	[-0.7983854]
115	2.4	0	-3.75117	116	182.033	0	-6.67978	115	105.233	0	-2.83182	115	78	0	[-3.090039]	115	16	1	[-0.7904528]
116	12.1	0	-3.74654	117	57.7	0	-6.67898	116	50.2333	0	-2.83062	116	47	0	[-3.088887]	116	35	1	[-0.78402585]
117	83.9667	0	-3.74621	118	98.7667	0	-6.67802	117	9.6	0	-2.82962	117	28	0	[-3.0857797]	117	49	0	[-0.77523935]
118	35.7	0	-3.74476	119	2.86667	0	-6.67483	118	36.0667	0	-2.8296	118	36	0	[-3.0846825]	118	48	0	[-0.77409554]
119	73.5667	0	-3.74472	120	35.7333	0	-6.67101	119	2.23333	0	-2.82319	119	62	0	[-3.082145]	119	72	0	[-0.7735181]
120	25.6333	0	-3.74404	121	25.7667	0	-6.67099	120	51.4667	0	-2.82194	120	68	0	[-3.0803657]	120	20	1	[-0.77274597]
121	35.7	0	-3.74006	122	49.0333	0	-6.66964	121	13.7	0	-2.81603	121	51	0	[-3.080305]	121	45	0	[-0.7588253]
122	8.36667	0	-3.73742	123	26.2	0	-6.66914	122	72.9	0	-2.80898	122	10	0	[-3.0797307]	122	28	0	[-0.7449467]
123	71	0	-3.73625	124	105.433	0	-6.65694	123	23.1667	0	-2.8089	123	45	0	[-3.0780265]	123	18	1	[-0.740481]
124	36.0667	0	-3.73474	125	78.7	0	-6.65585	124	167.367	0	-2.80705	124	37	0	[-3.0754683]	124	69	0	[-0.73590636]
125	86.4667	0	-3.73232	126	75.6	0	-6.65351	125	54.5	0	-2.8056	125	21	0	[-3.0752084]	125	44	0	[-0.73161423]
126	7.26667	0	-3.732	127	98.9667	0	-6.65334	126	11	0	-2.80497	126	80	0	[-3.0749319]	126	74	0	[-0.7275542]
127	5.23333	0	-3.73059	128	1.06667	0	-6.65241	127	144.967	0	-2.80371	127	41	0	[-3.0744789]	127	71	0	[-0.72510076]
128	84.1333	0	-3.72796	129	59.1667	0	-6.65196	128	35.9667	0	-2.80173	128	65	0	[-3.073461]	128	46	0	[-0.7230556]
129	50.5667	0	-3.71485	130	37.0333	0	-6.65154	129	96.3667	0	-2.79997	129	60	0	[-3.0725439]	129	29	1	[-0.70381004]
130	70.4333	0	-3.7115	131	35.2667	0	-6.64934	130	59.8667	0	-2.7975	130	65	0	[-3.0725086]	130	42	0	[-0.6819924]
131	51.8333	0	-3.70714	132	97.9333	0	-6.64884	131	3.83333	0	-2.79698	131	62	0	[-3.0709274]	131	59	0	[-0.67463946]
132	26.3	0	-3.70677	133	4.26667	0	-6.64831	132	94.5	0	-2.79058	132	60	0	[-3.0704517]	132	49	0	[-0.6729666]
133	87.1333	0	-3.70502	134	107.5	0	-6.64548	133	85.0333	0	-2.78604	133	66	0	[-3.069926]	133	63	0	[-0.651273]
134	36.2333	0	-3.70212	135	58.1	0	-6.64483	134	1.13333	0	-2.77919	134	76	0	[-3.0674014]	134	19	1	[-0.6500629]
135	109.933	0	-3.69847	136	37.4333	0	-6.64314	135	125.467	0	-2.77854	135	51	0	[-3.0640485]	135	60	0	[-0.64686704]
136	68.7333	0	-3.69605	137	58.5667	0	-6.64141	136	28.9	0	-2.76982	136	6	0	[-3.0629635]	136	56	0	[-0.6463672]
137	106.833	0	-3.68928	138	113.867	0	-6.63973	137	29.4667	0	-2.7642	137	56	0	[-3.0607893]	137	59	0	[-0.6311189]
138	25.2	0	-3.68495	139	37.2667	0	-6.63658	138	93.8667	0	-2.76363	138	52	0	[-3.0593905]	138	37	0	[-0.62430257]
139	38.3333	0	-3.68346	140	78.7	0	-6.63637	139	128.967	0	-2.75787	139	14	0	[-3.0578754]	139	11	1	[-0.6200939]
140	72.7	0	-3.668	141	3.83333	0	-6.63557	140	59.9667	0	-2.75599	140	76	0	[-3.0557353]	140	52	0	[-0.6120092]
141	36.5667	0	-3.66643	142	30.7	0	-6.63499	141	25.5	0	-2.75078	141	60	0	[-3.0555341]	141	16	1	[-0.60031974]
142	45.0333	0	-3.66591	143	88.3667	0	-6.63273	142	11.1333	0	-2.74945	142	63	0	[-3.0522592]	142	45	0	[-0.59762967]
143	36.6667	0	-3.6623	144	37.2333	0	-6.62944	143	86.8667	0	-2.74904	143	28	0	[-3.0507078]	143	44	0	[-0.56038606]
144	144.633	0	-3.66122	145	5.63333	0	-6.62718	144	75.2	0	-2.74883	144	78	0	[-3.0472116]	144	27	1	[-0.5472107]
145	35.2	0	-3.65823	146	83.3333	0	-6.62666	145	33.4667	0	-2.74294	145	44	0	[-3.04698]	145	12	0	[-0.5245191]
146	90.1667	0	-3.65593	147	62.6	0	-6.62566	146	61.9	0	-2.74152	146	61	0	[-3.044769]	146	31	1	[-0.52026814]
147	147.3	0	-3.6492	148	36.4	0	-6.62527	147	131.733	0	-2.73957	147	64	0	[-3.0443985]	147	23	1	[-0.48807245]
148	115.9	0	-3.64011	149	97.5667	0	-6.62518	148	35.7	0	-2.73378	148	109	0	[-3.0403187]	148	38	0	[-0.48171514]
149	9.86667	0	-3.63999	150	97.5667	0	-6.62351	149	37.5667	0	-2.72935	149	78	0	[-3.039461]	149	58	0	[-0.48025244]
150	81.2667	0	-3.62307	151	124.833	0	-6.62161	150	77.7333	0	-2.72682	150	36	0	[-3.0391037]	150	42	1	[-0.47198886]
151	25.3667	0	-3.62153	152	37.4333	0	-6.61805	151	31.6333	0	-2.72398	151	57	0	[-3.0390189]	151	55	0	[-0.46775174]
152	42.0667	0	-3.61128	153	60.9333	0	-6.61661	152	55.7667	0	-2.72368	152	68	0	[-3.0337334]	152	15	1	[-0.4481218]
153	83.8667	0	-3.60959	154	35.2333	0	-6.60146	153	36.4667	0	-2.7219	153	39	0	[-3.031918]	153	52	0	[-0.42516077]
154	47.2333	0	-3.60799	155	60.9	0	-6.59934	154	58.6	0	-2.71802	154	55	0	[-3.0297174]	154	69	0	[-0.4190123]
155	27.9333	0	-3.6046	156	61.8667	0	-6.59915	155	36.2	0	-2.70582	155	58	0	[-3.0295877]	155	52	0	[-0.4176104]
156	66.4	0	-3.60169	157	88.1667	0	-6.59855	156	25.9	0	-2.69866	156	67	0	[-3.0257227]	156	22	1	[-0.38970196]
157	53.4333	0	-3.59979	158	50.3667	0	-6.59813	157	6.03333	0	-2.69145	157	49	0	[-3.0229423]	157	40	0	[-0.3633178]
158	39.8667	0	-3.59904	159	52.3	0	-6.59464	158	53.4333	0	-2.6914	158	49	0	[-3.0217998]	158	42	0	[-0.36006606]
159	101.467	0	-3.59544	160	61.4333	0	-6.59461	159	36.9333	0	-2.69038	159	39	0	[-3.0181835]	159	75	0	[-0.35578865]
160	48.6333	0	-3.58075	161	49.2	0	-6.59415	160	36.4667	0	-2.68695	160	7	0	[-3.0043151]	160	20	1	[-0.30907458]
161	29.8	0	-3.57743	162	37.5	0	-6.59413	161	89.1667	0	-2.68409	161	75	0	[-3.0025423]	161	43	0	[-0.22503395]
162	23.8667	0	-3.56505	163	50.5333	0	-6.59374	162	110.467	0	-2.68257	162	25	0	[-3.0014532]
163	3.93333	0	-3.55331	164	37.4333	0	-6.59298	163	62.7667	0	-2.6818	163	55	0	[-2.9998698]
164	62.4333	0	-3.55219	165	49.5	1	-6.59159	164	100.867	0	-2.67673	164	49	0	[-2.9996169]
165	26.6333	0	-3.5509	166	181.333	0	-6.58111	165	118.767	0	-2.66968	165	50	0	[-2.9982095]
166	69.3667	0	-3.54948	167	49.7	0	-6.57543	166	73.7	0	-2.66417	166	61	0	[-2.9936402]
167	33.8	0	-3.54875	168	69.9	0	-6.5754	167	1.53333	0	-2.65544	167	115	0	[-2.988759]
168	7.13333	0	-3.54793	169	26.1333	0	-6.57494	168	35.0333	0	-2.64223	168	44	0	[-2.9877946]
169	169.633	0	-3.54709	170	24.9333	0	-6.56786	169	6.73333	0	-2.64015	169	51	0	[-2.987504]
170	37.5333	0	-3.54527	171	63.7667	0	-6.56588	170	50.9	0	-2.63635	170	6	0	[-2.9844744]
171	55.5	0	-3.54392	172	63.5667	0	-6.56574	171	36.4333	0	-2.63616	171	42	0	[-2.9822233]
172	136.567	0	-3.54343	173	29.8333	0	-6.5648	172	34.5333	0	-2.63522	172	48	0	[-2.9810107]
173	5.83333	0	-3.53146	174	49.2667	0	-6.56426	173	49.4	0	-2.62946	173	105	0	[-2.972091]
174	59.4667	0	-3.52847	175	57.6333	0	-6.56037	174	58.6	0	-2.62631	174	93	0	[-2.9718318]
175	31.3333	0	-3.5247	176	54.6667	0	-6.55847	175	66.1333	0	-2.61793	175	43	0	[-2.9702024]
176	50.5333	0	-3.52157	177	67.0333	0	-6.55769	176	3.33333	0	-2.61187	176	45	0	[-2.9677534]
177	37.9667	0	-3.516	178	3.6	0	-6.55582	177	86.7	0	-2.61169	177	109	0	[-2.9662192]
178	60.4667	0	-3.51457	179	35	0	-6.55578	178	86.1333	0	-2.60918	178	29	0	[-2.9606457]
179	4.23333	0	-3.51367	180	69.9333	0	-6.55486	179	1.13333	0	-2.60222	179	44	0	[-2.9596655]
180	35.9	0	-3.51318	181	128.033	0	-6.55448	180	6.43333	0	-2.59082	180	65	0	[-2.955786]
181	10.1333	0	-3.51104	182	28.4667	0	-6.55385	181	48.0667	0	-2.58744	181	43	0	[-2.9555078]
182	86.8667	0	-3.50477	183	35	0	-6.55346	182	60.7	0	-2.58658	182	69	0	[-2.9535248]
183	99.8	0	-3.50125	184	35.8	0	-6.55285	183	5.2	0	-2.58468	183	49	0	[-2.9516308]
184	34.7667	0	-3.49712	185	56	0	-6.55252	184	30.3333	0	-2.57794	184	57	0	[-2.9514492]
185	82.4667	0	-3.49326	186	38.2333	0	-6.55252	185	52.7	0	-2.56995	185	31	0	[-2.951128]
186	32.0667	0	-3.4907	187	4.73333	0	-6.55215	186	51.2667	0	-2.56734	186	54	0	[-2.9508007]
187	31.2667	0	-3.48712	188	56.9333	0	-6.55134	187	72.7667	0	-2.56325	187	36	0	[-2.9504015]
188	50.5667	0	-3.4857	189	33.8667	0	-6.54375	188	98.9667	0	-2.56062	188	29	0	[-2.9499745]
189	54.5	0	-3.48481	190	85.8	0	-6.54243	189	133.267	0	-2.55972	189	53	1	[-2.9497077]
190	85.2	0	-3.4826	191	86.9667	0	-6.53925	190	69.7667	0	-2.55782	190	45	0	[-2.9493184]
191	30.1333	0	-3.48175	192	117.333	0	-6.53613	191	22.3	0	-2.55744	191	44	0	[-2.9483864]
192	106.633	0	-3.48026	193	15.5	0	-6.53556	192	126.1	0	-2.55624	192	72	0	[-2.9471009]
193	1.96667	0	-3.4769	194	137.033	0	-6.53178	193	70.2333	0	-2.55366	193	46	0	[-2.9466493]
194	3.5	0	-3.47279	195	64.4333	0	-6.52959	194	32.6	0	-2.55207	194	103	0	[-2.946431]
195	4	0	-3.47254	196	100.367	0	-6.52799	195	59.8	0	-2.55052	195	28	0	[-2.9457433]
196	37.6	0	-3.47054	197	16.7333	0	-6.52466	196	68.4	0	-2.54546	196	26	0	[-2.9431217]
197	53.0333	0	-3.4681	198	4.23333	0	-6.51868	197	25.0333	0	-2.5351	197	74	0	[-2.9431126]
198	34.9333	0	-3.46808	199	2.66667	0	-6.51423	198	60.4	0	-2.53324	198	36	0	[-2.9414508]
199	76.9667	0	-3.46295	200	64.9	0	-6.51366	199	97.7333	0	-2.52787	199	55	0	[-2.941242]
200	82.8333	0	-3.45846	201	51.6333	0	-6.50902	200	10	0	-2.52573	200	51	0	[-2.9396331]
201	55.1	0	-3.4548	202	30.5333	0	-6.50653	201	35.4333	0	-2.52156	201	44	0	[-2.93902]
202	50.3333	0	-3.4522	203	37.1	0	-6.50507	202	12.6	0	-2.51855	202	68	0	[-2.9359453]
203	120.133	0	-3.44358	204	46.3667	0	-6.50414	203	110.633	0	-2.51699	203	48	0	[-2.9328833]
204	33.2333	0	-3.44217	205	8.33333	0	-6.50129	204	49.6333	0	-2.51617	204	52	0	[-2.9298878]
205	37.4333	0	-3.44212	206	134.333	0	-6.49854	205	144.467	0	-2.51564	205	41	0	[-2.9287155]
206	5.56667	0	-3.44116	207	35.6667	0	-6.49821	206	93.5667	0	-2.51468	206	59	0	[-2.9280698]
207	61.9333	0	-3.44033	208	34.5667	0	-6.49458	207	35.6	0	-2.50715	207	34	0	[-2.9269278]
208	60.6333	0	-3.43555	209	88.0667	0	-6.49268	208	65.2667	0	-2.50629	208	70	0	[-2.9224563]
209	52.7667	0	-3.43512	210	111.033	0	-6.49034	209	47.1667	0	-2.50235	209	46	0	[-2.9215984]
210	61.7333	0	-3.43457	211	3.46667	0	-6.48408	210	93.1333	0	-2.50196	210	51	0	[-2.9186637]
211	109.6	0	-3.43363	212	36.1667	0	-6.48293	211	36.2333	0	-2.50138	211	88	0	[-2.9185894]
212	66.4333	0	-3.43214	213	36.3667	0	-6.48119	212	128.3	0	-2.49972	212	47	0	[-2.9134288]
213	55.0667	0	-3.42916	214	63.8333	0	-6.48008	213	83.1	0	-2.49618	213	19	1	[-2.9130278]
214	7.5	0	-3.42855	215	132.7	0	-6.47963	214	68.9	0	-2.4938	214	73	0	[-2.9088078]
215	49.6	0	-3.42576	216	121.7	0	-6.47934	215	32.2667	0	-2.49293	215	47	0	[-2.9072502]
216	36.7	0	-3.42147	217	52.7333	0	-6.47339	216	50.4333	0	-2.48807	216	48	0	[-2.906197]
217	4.16667	0	-3.41818	218	33.4	0	-6.47157	217	8.53333	0	-2.48756	217	43	0	[-2.903845]
218	37.0667	0	-3.41044	219	33.3333	0	-6.46766	218	36.8667	0	-2.48701	218	99	0	[-2.8980439]
219	92.0667	0	-3.40898	220	64.4333	0	-6.45957	219	95.4667	0	-2.48593	219	49	0	[-2.8927572]
220	4.2	0	-3.40517	221	1.36667	0	-6.45898	220	56.1333	0	-2.48281	220	63	0	[-2.891414]
221	96.8333	0	-3.40156	222	57.9333	0	-6.45753	221	59.7333	0	-2.48189	221	26	0	[-2.8857577]
222	36.8667	0	-3.39913	223	69.5333	0	-6.45675	222	2.76667	0	-2.47963	222	35	0	[-2.8856852]
223	25.1333	0	-3.39786	224	60.4667	0	-6.4567	223	36.3333	0	-2.47895	223	65	0	[-2.8848114]
224	3.8	0	-3.39667	225	53.5333	0	-6.45621	224	86.6333	0	-2.47691	224	60	0	[-2.88432]
225	33.3333	0	-3.39434	226	126.233	0	-6.44896	225	90.7667	0	-2.4754	225	59	0	[-2.884071]
226	180.7	0	-3.38726	227	54.0667	0	-6.44886	226	2.3	0	-2.46471	226	24	0	[-2.8836896]
227	108.8	0	-3.38688	228	97.7333	0	-6.44868	227	85.5333	0	-2.46181	227	13	0	[-2.8822587]
228	26.6667	0	-3.38573	229	24.6	0	-6.44727	228	36.6	0	-2.45947	228	13	0	[-2.8817046]
229	27.0333	0	-3.37872	230	52.1667	0	-6.44566	229	119.2	0	-2.45707	229	49	0	[-2.8804226]
230	3.76667	0	-3.37811	231	36.5333	0	-6.44452	230	100.1	0	-2.45428	230	116	0	[-2.878667]
231	131.267	0	-3.3754	232	11.1333	0	-6.4425	231	104.067	0	-2.45356	231	60	0	[-2.877846]
232	34.1333	0	-3.37423	233	55.3333	0	-6.4395	232	49.4	0	-2.45247	232	82	0	[-2.8769114]
233	26.2	0	-3.37255	234	17.1333	1	-6.43918	233	51.3	0	-2.45238	233	59	0	[-2.875749]
234	73.7667	0	-3.37081	235	39.9333	0	-6.43862	234	61.8	0	-2.44714	234	49	0	[-2.8743272]
235	115.833	0	-3.3687	236	0.133333	0	-6.43847	235	113.967	0	-2.44525	235	47	0	[-2.8706148]
236	85.1	0	-3.36689	237	121.667	0	-6.43671	236	50.6333	0	-2.44481	236	36	0	[-2.8684287]
237	130.3	0	-3.36321	238	144.933	0	-6.4357	237	25.9333	0	-2.43496	237	64	0	[-2.8666275]
238	96.8	0	-3.36276	239	32.9	0	-6.43487	238	115.5	0	-2.43403	238	68	0	[-2.8647263]
239	58.6333	0	-3.36168	240	126.1	0	-6.43307	239	57.2667	0	-2.42666	239	62	0	[-2.8638353]
240	104.6	0	-3.35601	241	144.8	0	-6.43133	240	59.6	0	-2.42438	240	83	0	[-2.861149]
241	52.7667	0	-3.34986	242	36.7	0	-6.43106	241	105.767	0	-2.4232	241	72	0	[-2.861027]
242	62.0333	0	-3.34758	243	121.033	0	-6.42655	242	49.6333	0	-2.42154	242	61	0	[-2.8610013]
243	48.7333	0	-3.34627	244	25.0333	1	-6.42583	243	90.1667	0	-2.42004	243	65	0	[-2.858682]
244	50.1333	0	-3.34337	245	87.8	0	-6.42511	244	35.9667	0	-2.41918	244	67	0	[-2.8558884]
245	140.1	0	-3.34229	246	61.9667	0	-6.42234	245	9.6	0	-2.41446	245	68	0	[-2.8558881]
246	80.1	0	-3.34138	247	35.5667	0	-6.41849	246	65.5333	0	-2.41304	246	27	0	[-2.8553722]
247	3.46667	0	-3.33885	248	53.4667	0	-6.41721	247	84.2333	0	-2.41099	247	48	0	[-2.853458]
248	110.2	0	-3.33708	249	95.6	0	-6.41556	248	29.8333	0	-2.40915	248	51	0	[-2.8528516]
249	36.3667	0	-3.33273	250	127.133	0	-6.41437	249	60.6333	0	-2.40278	249	48	0	[-2.8516028]
250	26.0333	0	-3.32663	251	14.0667	0	-6.40977	250	6.73333	0	-2.39718	250	80	0	[-2.8513458]
251	37.1333	0	-3.3178	252	111.8	0	-6.40768	251	33.8	0	-2.39476	251	52	0	[-2.8506205]
252	13.8	0	-3.31179	253	101.533	0	-6.40616	252	85.7333	0	-2.39406	252	26	0	[-2.8503153]
253	30.9333	0	-3.30993	254	1.93333	0	-6.4033	253	27.5	0	-2.39219	253	39	1	[-2.847994]
254	126.5	0	-3.30934	255	124.533	0	-6.40298	254	37.3	0	-2.38609	254	50	0	[-2.8465736]
255	28.4667	0	-3.30632	256	73	0	-6.40193	255	10.9333	0	-2.38581	255	53	0	[-2.8436496]
256	66	0	-3.30483	257	72.2667	0	-6.4015	256	62.9	0	-2.38449	256	60	0	[-2.8419082]
257	52.4333	0	-3.30304	258	3.8	0	-6.39995	257	131.333	0	-2.38049	257	71	0	[-2.8388884]
258	67.9667	0	-3.3007	259	47.6	0	-6.39333	258	55.6	0	-2.38036	258	34	0	[-2.8383634]
259	114.7	0	-3.2982	260	72.3	0	-6.39173	259	121.533	0	-2.37023	259	58	0	[-2.8364162]
260	5.23333	0	-3.2968	261	19.7333	0	-6.3896	260	96.8	0	-2.3641	260	93	0	[-2.8355138]
261	36	0	-3.29489	262	96.2	0	-6.38452	261	36.5667	0	-2.35604	261	47	0	[-2.8339136]
262	48.4	0	-3.29195	263	27.2667	0	-6.37986	262	61.3333	0	-2.34884	262	74	0	[-2.8335683]
263	71.9667	0	-3.28983	264	128.133	1	-6.37832	263	35.3667	0	-2.34883	263	41	0	[-2.8331463]
264	131.733	0	-3.28787	265	6.36667	0	-6.37382	264	0.6	0	-2.34553	264	23	1	[-2.8304803]
265	58.9667	0	-3.28691	266	67.5333	0	-6.36973	265	12.1	0	-2.33546	265	70	0	[-2.8298337]
266	85.8	0	-3.28612	267	23.3333	0	-6.36886	266	99.9333	0	-2.33433	266	51	0	[-2.8288739]
267	36.8	0	-3.28598	268	48.7333	0	-6.3675	267	29.2667	0	-2.33248	267	13	0	[-2.828345]
268	29.4667	0	-3.28136	269	26.4667	0	-6.35838	268	29.2667	0	-2.32744	268	115	0	[-2.8278408]
269	12.3333	0	-3.27739	270	36.8667	0	-6.35717	269	24.3333	0	-2.32165	269	78	0	[-2.8256853]
270	34.5	0	-3.27593	271	72.1667	0	-6.3571	270	36.9	0	-2.32088	270	48	0	[-2.8220472]
271	48.8667	0	-3.27528	272	145.467	0	-6.35547	271	8.3	0	-2.31755	271	59	0	[-2.8192942]
272	81.7	0	-3.2722	273	126.1	0	-6.3508	272	88.5333	0	-2.31511	272	64	0	[-2.8178194]
273	57.4333	0	-3.2693	274	49.8	0	-6.34966	273	84.6333	0	-2.31493	273	104	0	[-2.8156161]
274	27	0	-3.26928	275	59	0	-6.34912	274	36.6333	0	-2.31189	274	78	0	[-2.814416]
275	35.2333	0	-3.26812	276	144.567	0	-6.34894	275	33.9333	1	-2.31047	275	66	0	[-2.8091934]
276	118.767	0	-3.25686	277	6.13333	0	-6.34715	276	49.4333	0	-2.30928	276	27	0	[-2.8088167]
277	37.7667	0	-3.25531	278	120.533	0	-6.34591	277	29.7333	0	-2.30506	277	33	0	[-2.808523]
278	144	0	-3.25424	279	59.3333	0	-6.34475	278	25.5	0	-2.30242	278	49	0	[-2.8084648]
279	106.667	0	-3.25254	280	75.4333	0	-6.34231	279	15.6333	0	-2.30065	279	35	0	[-2.8068678]
280	3.03333	0	-3.24628	281	96.3333	0	-6.34105	280	72.1333	0	-2.29732	280	38	0	[-2.8043272]
281	37.9	0	-3.24623	282	115.033	0	-6.34034	281	25.7	0	-2.29607	281	38	0	[-2.803237]
282	6.06667	0	-3.24603	283	35.4333	0	-6.3383	282	50.1	0	-2.29553	282	67	0	[-2.8028662]
283	3.1	0	-3.24576	284	96.5667	0	-6.33823	283	70.1333	0	-2.2889	283	63	0	[-2.8017242]
284	10.9667	0	-3.24524	285	31.3667	0	-6.33647	284	5	0	-2.27949	284	34	0	[-2.7984488]
285	35.9	0	-3.24416	286	133.333	0	-6.33582	285	52.6333	0	-2.27837	285	26	0	[-2.796402]
286	37.4	0	-3.24412	287	38.5333	0	-6.33395	286	35.9667	0	-2.27651	286	28	0	[-2.7949934]
287	57.4333	0	-3.23977	288	36.1333	0	-6.33216	287	109.867	0	-2.27651	287	56	0	[-2.7949526]
288	6.33333	0	-3.23862	289	27.8	0	-6.33192	288	74.4667	0	-2.27408	288	98	0	[-2.794645]
289	55.1333	0	-3.2375	290	58.3667	0	-6.33163	289	64.2	0	-2.26872	289	84	0	[-2.7939563]
290	61.3667	0	-3.22882	291	56.4667	0	-6.33053	290	5.16667	0	-2.26614	290	31	0	[-2.7937953]
291	62.7	0	-3.22777	292	81.4333	0	-6.32913	291	3.8	0	-2.26609	291	59	0	[-2.7890706]
292	2.1	0	-3.22554	293	99.3	0	-6.32688	292	36.4333	0	-2.26251	292	67	0	[-2.786844]
293	30	0	-3.22519	294	57.7	0	-6.32418	293	36.5333	0	-2.26014	293	47	0	[-2.7861016]
294	87.0333	0	-3.21635	295	133	0	-6.32013	294	95.6	0	-2.25976	294	18	0	[-2.7848914]
295	78.4	0	-3.21631	296	11.6667	0	-6.31972	295	60.1667	0	-2.25584	295	15	0	[-2.783967]
296	36.9667	0	-3.21619	297	37.8667	0	-6.3176	296	79.3	0	-2.2548	296	39	0	[-2.7803342]
297	25.2	0	-3.21523	298	10.4667	0	-6.31756	297	8.6	0	-2.24877	297	47	0	[-2.77869]
298	49.0667	0	-3.21138	299	35.8333	0	-6.31489	298	30.2	0	-2.24863	298	37	0	[-2.7785873]
299	27.9333	0	-3.21133	300	74.7	0	-6.31312	299	47.3667	0	-2.24764	299	56	0	[-2.7777665]
300	20.4	0	-3.20474	301	68.6667	0	-6.31057	300	129.2	0	-2.24644	300	66	0	[-2.7707]
301	10.8333	0	-3.20356	302	134.5	0	-6.31033	301	87.5333	0	-2.24451	301	42	0	[-2.7694724]
302	35.8333	0	-3.20297	303	115.233	0	-6.31006	302	133.3	0	-2.24367	302	62	0	[-2.7685764]
303	63.3667	0	-3.20229	304	97.4	0	-6.30931	303	84.9667	0	-2.23969	303	46	0	[-2.7673655]
304	61.7	0	-3.20085	305	35.1	0	-6.30683	304	55.0667	0	-2.23804	304	24	0	[-2.7668068]
305	98.7	0	-3.19829	306	5.63333	0	-6.30239	305	112	0	-2.23744	305	57	0	[-2.7628634]
306	72.1667	0	-3.19049	307	61.0333	0	-6.30033	306	1.2	0	-2.2357	306	34	0	[-2.7610292]
307	144.433	0	-3.18718	308	106.2	0	-6.29997	307	37.1667	0	-2.23229	307	27	0	[-2.7599022]
308	56.2333	0	-3.18517	309	94.0333	0	-6.29981	308	48.9	0	-2.23227	308	64	0	[-2.7591293]
309	181.633	0	-3.18312	310	26.1	0	-6.29931	309	43.8	0	-2.22861	309	38	0	[-2.7585537]
310	109.1	0	-3.18135	311	24.1	0	-6.29838	310	2.26667	0	-2.22836	310	116	0	[-2.7576325]
311	125.467	0	-3.17988	312	56.6	0	-6.29838	311	36.9667	0	-2.22488	311	41	0	[-2.7571232]
312	39.0333	0	-3.17893	313	4	0	-6.29776	312	83.5333	0	-2.22257	312	55	0	[-2.7537415]
313	123.9	0	-3.17518	314	30.7667	0	-6.29727	313	3.9	0	-2.22099	313	58	0	[-2.7493718]
314	80.3667	0	-3.17438	315	108.5	0	-6.29336	314	60.1667	0	-2.21545	314	50	0	[-2.7470145]
315	58.9667	0	-3.17132	316	85.2	0	-6.29296	315	133.3	0	-2.21081	315	62	0	[-2.7462997]
316	144.2	0	-3.17014	317	58.4667	0	-6.29014	316	17.8667	0	-2.21072	316	56	0	[-2.74447]
317	37.3667	0	-3.16234	318	85.7667	0	-6.2898	317	34.0667	0	-2.207	317	75	0	[-2.7400477]
318	28.4333	0	-3.16213	319	53.8667	0	-6.28801	318	70.7	0	-2.2029	318	44	0	[-2.738706]
319	82.3667	1	-3.16002	320	70.5667	0	-6.28793	319	6.56667	0	-2.20229	319	77	0	[-2.7386582]
320	6.06667	0	-3.15522	321	31.8333	0	-6.28573	320	93.4	0	-2.19452	320	76	0	[-2.7369115]
321	100.633	0	-3.15434	322	138.7	0	-6.28365	321	60.6333	0	-2.19446	321	51	0	[-2.7318335]
322	53.5333	0	-3.15247	323	37.3333	0	-6.28223	322	5.66667	0	-2.19367	322	15	0	[-2.7297313]
323	86.3333	0	-3.14828	324	101.033	0	-6.28199	323	97.0333	0	-2.19215	323	2	0	[-2.727246]
324	122.967	0	-3.14753	325	60.4333	0	-6.27998	324	106.767	0	-2.19105	324	53	0	[-2.7244985]
325	74.4	0	-3.14688	326	4	0	-6.2776	325	30.8333	0	-2.18734	325	1	0	[-2.7244453]
326	25.9667	0	-3.14326	327	83.7667	0	-6.2766	326	9.1	0	-2.18416	326	48	0	[-2.7199562]
327	53.4	0	-3.14132	328	130.633	0	-6.27604	327	32.8333	0	-2.18301	327	66	0	[-2.7197018]
328	112.7	0	-3.14071	329	87.2667	0	-6.27547	328	34.1333	0	-2.1808	328	32	0	[-2.7184043]
329	24.7	0	-3.14011	330	28.7	0	-6.27451	329	71.2	0	-2.18019	329	55	0	[-2.7169023]
330	10.5333	0	-3.13636	331	109.233	0	-6.27327	330	95.9333	0	-2.17616	330	48	0	[-2.7163029]
331	155.767	0	-3.1355	332	98.7	0	-6.26863	331	59.4667	0	-2.1659	331	52	0	[-2.7160275]
332	109.7	0	-3.13421	333	59.2667	0	-6.26584	332	54.2667	0	-2.16588	332	22	0	[-2.7152138]
333	35.7333	0	-3.13299	334	38	0	-6.26412	333	52.8333	0	-2.16351	333	49	0	[-2.7122889]
334	73.8	0	-3.13167	335	45.9667	0	-6.25753	334	57.1333	0	-2.16297	334	16	0	[-2.7112045]
335	7.46667	0	-3.12986	336	6.33333	0	-6.25593	335	2.13333	0	-2.16047	335	57	0	[-2.7055068]
336	37.5	0	-3.12908	337	61.5	0	-6.25128	336	33.8	0	-2.15284	336	52	0	[-2.7041202]
337	4.5	0	-3.12632	338	35.8333	0	-6.25109	337	38.1667	0	-2.15102	337	33	0	[-2.702107]
338	33.1	1	-3.12134	339	69.6667	0	-6.24262	338	119.767	0	-2.14967	338	14	0	[-2.7000299]
339	8.23333	0	-3.12056	340	44.8333	0	-6.24193	339	51.5667	0	-2.14524	339	76	0	[-2.6973994]
340	74.6333	1	-3.11485	341	36.4333	0	-6.24191	340	122.733	0	-2.14348	340	1	0	[-2.69122]
341	60.1667	0	-3.11464	342	35.5667	0	-6.23328	341	81.4667	0	-2.14298	341	50	0	[-2.6881]
342	51.8667	0	-3.11448	343	111.667	0	-6.23311	342	49.5333	0	-2.12969	342	47	0	[-2.687799]
343	29.1	0	-3.10834	344	107.3	0	-6.23123	343	31.6667	0	-2.12794	343	27	0	[-2.6852944]
344	59.3333	0	-3.10789	345	145.633	0	-6.22902	344	24.7333	0	-2.12698	344	28	1	[-2.6832697]
345	139.267	0	-3.10705	346	100.767	1	-6.22382	345	92.8667	0	-2.11848	345	34	0	[-2.6820195]
346	61.5	0	-3.10499	347	107.867	0	-6.2218	346	96.1333	0	-2.11556	346	27	0	[-2.680549]
347	115.9	0	-3.10354	348	31.8	0	-6.21828	347	1.86667	0	-2.11552	347	73	0	[-2.6763337]
348	146.467	0	-3.10326	349	36.6333	0	-6.21777	348	97.4333	0	-2.1146	348	39	0	[-2.6720538]
349	60.0333	0	-3.09719	350	108.967	0	-6.21241	349	57.5667	0	-2.11288	349	48	0	[-2.668279]
350	63.4667	0	-3.09631	351	79.5333	0	-6.21078	350	28	0	-2.11105	350	13	0	[-2.6658905]
351	88.7667	0	-3.09554	352	44.0667	0	-6.21078	351	108.267	0	-2.11051	351	67	0	[-2.664459]
352	96	0	-3.09074	353	180.2	0	-6.21077	352	60.2	0	-2.10972	352	36	0	[-2.664203]
353	59.9333	1	-3.09031	354	38	0	-6.21019	353	108.267	0	-2.10337	353	24	0	[-2.6622179]
354	12.0333	0	-3.08584	355	11.5333	0	-6.20891	354	12.6	0	-2.10215	354	52	0	[-2.6594188]
355	35.7333	0	-3.08567	356	114.7	0	-6.20603	355	12.8	0	-2.10135	355	51	0	[-2.6591465]
356	169.467	0	-3.08156	357	36.2333	0	-6.20426	356	153.2	0	-2.09916	356	41	0	[-2.6562834]
357	3.33333	0	-3.08078	358	59.5333	0	-6.19902	357	5.66667	0	-2.09608	357	61	0	[-2.655918]
358	120.433	0	-3.07834	359	188.8	0	-6.19738	358	47.1667	0	-2.09164	358	63	0	[-2.6550143]
359	55.5	0	-3.07546	360	59.3	1	-6.19602	359	3.63333	0	-2.08645	359	52	0	[-2.6529944]
360	74.4667	0	-3.07544	361	10.7667	0	-6.18966	360	90.6333	0	-2.07858	360	70	0	[-2.6524932]
361	32.9333	0	-3.07543	362	56.9667	0	-6.18794	361	120.9	0	-2.07792	361	57	0	[-2.6504023]
362	106.633	0	-3.07036	363	148.533	0	-6.18728	362	57.8667	0	-2.07785	362	100	0	[-2.6498077]
363	135.3	0	-3.06659	364	5.36667	0	-6.18722	363	51.5	0	-2.07664	363	57	0	[-2.6476529]
364	59.9667	0	-3.06609	365	67.5333	0	-6.18228	364	57.3333	0	-2.07586	364	49	0	[-2.6461976]
365	28.5333	0	-3.06334	366	172.167	0	-6.18201	365	81.5667	0	-2.0731	365	54	0	[-2.6445918]
366	27.3333	0	-3.06128	367	60.2	0	-6.18109	366	36.0333	0	-2.0598	366	53	0	[-2.6439767]
367	62.5333	0	-3.05712	368	3.33333	0	-6.17963	367	94.3	0	-2.0543	367	2	0	[-2.6434767]
368	98.4667	0	-3.05668	369	65.4667	0	-6.17363	368	25.3667	0	-2.05093	368	66	0	[-2.6409843]
369	134.9	0	-3.05563	370	84.2667	0	-6.17044	369	63.8	0	-2.0454	369	53	0	[-2.638432]
370	36.5667	0	-3.05486	371	3.2	0	-6.16991	370	67.4	0	-2.04418	370	8	0	[-2.6332326]
371	127.7	0	-3.05469	372	0.733333	0	-6.16535	371	1.9	0	-2.04362	371	55	0	[-2.6330545]
372	112.867	0	-3.05337	373	97.1	0	-6.16433	372	36.5667	0	-2.04214	372	61	0	[-2.6320374]
373	4.23333	0	-3.05273	374	26.9	0	-6.16432	373	116.667	0	-2.0346	373	63	0	[-2.6314604]
374	113	0	-3.05172	375	73.0667	0	-6.16165	374	59.4333	0	-2.03233	374	49	0	[-2.6305904]
375	63.9333	0	-3.04998	376	34.7667	0	-6.16127	375	4	0	-2.02904	375	70	0	[-2.6304324]
376	3.16667	0	-3.04913	377	5.13333	0	-6.16104	376	143.633	0	-2.02769	376	2	0	[-2.6296904]
377	24.8667	0	-3.04629	378	80.3333	0	-6.15894	377	88.2	0	-2.02396	377	13	0	[-2.6293101]
378	60.5667	0	-3.04594	379	90.5	0	-6.15502	378	128.3	0	-2.02275	378	44	0	[-2.629258]
379	28.9333	0	-3.0447	380	35.4667	0	-6.15388	379	35.7333	0	-2.02188	379	1	0	[-2.6244605]
380	26.3333	0	-3.04124	381	36.6667	0	-6.1468	380	58.7	0	-2.01844	380	63	0	[-2.614362]
381	63.7333	0	-3.03873	382	57.5	0	-6.14342	381	68	1	-2.01661	381	44	0	[-2.6131961]
382	11.5333	0	-3.03788	383	27.7667	0	-6.14256	382	75.3	0	-2.00573	382	66	0	[-2.6131856]
383	34.0333	0	-3.03649	384	51.9667	0	-6.1424	383	96.1667	0	-2.00333	383	66	0	[-2.6120293]
384	112.467	0	-3.03541	385	147.967	0	-6.13891	384	42.2	0	-2.00302	384	47	0	[-2.6092641]
385	99.2667	0	-3.03246	386	48	0	-6.13601	385	72.5333	0	-2.0014	385	56	0	[-2.605768]
386	2.86667	0	-3.03118	387	111.967	0	-6.13548	386	12.5333	0	-2.00088	386	1	0	[-2.6009471]
387	6.36667	0	-3.02911	388	76.3	0	-6.13538	387	126.167	0	-1.9988	387	30	0	[-2.5940907]
388	119.867	0	-3.02733	389	82.4667	0	-6.13412	388	27.0333	0	-1.99789	388	28	0	[-2.5938756]
389	121.867	0	-3.02672	390	12.9	0	-6.12912	389	98.8	0	-1.99718	389	30	0	[-2.5887494]
390	85.4667	0	-3.02668	391	70.6	0	-6.12766	390	9.83333	0	-1.99096	390	47	0	[-2.585743]
391	63.3	0	-3.02232	392	118.967	0	-6.12709	391	47	0	-1.9896	391	75	0	[-2.583901]
392	27.3667	0	-3.01984	393	36.8667	0	-6.12542	392	31.5	0	-1.9879	392	40	0	[-2.5810835]
393	35.5	0	-3.01575	394	152.867	0	-6.12212	393	162.467	0	-1.98671	393	62	0	[-2.5792613]
394	114.367	0	-3.01334	395	82.6	0	-6.1212	394	35.6333	0	-1.98632	394	66	0	[-2.5790024]
395	12.2	0	-3.01149	396	97.9333	0	-6.11656	395	37.2667	0	-1.98524	395	98	0	[-2.5786564]
396	54.1333	0	-3.01134	397	24.8333	0	-6.11031	396	1.76667	0	-1.98065	396	50	0	[-2.575321]
397	60.6	0	-3.01121	398	115.533	0	-6.10897	397	31.8667	0	-1.97827	397	9	0	[-2.57426]
398	73.1667	0	-3.01115	399	33.5333	0	-6.09997	398	134.967	0	-1.97322	398	40	0	[-2.5705116]
399	72.0667	0	-3.00874	400	92.6333	0	-6.09816	399	52.9333	0	-1.96737	399	39	0	[-2.5677297]
400	63.7333	0	-3.00815	401	102.767	0	-6.09712	400	40.3333	0	-1.96309	400	58	0	[-2.5659342]
401	2.9	0	-3.00748	402	60.1667	0	-6.09605	401	135.6	0	-1.95963	401	46	0	[-2.5654535]
402	36.6667	0	-3.00072	403	37.4	0	-6.09479	402	14.9	0	-1.95912	402	47	0	[-2.563502]
403	33.8667	0	-2.9995	404	169	0	-6.09388	403	11.1667	0	-1.95817	403	67	0	[-2.5586607]
404	55.2667	0	-2.99685	405	59.9667	0	-6.09386	404	3.06667	0	-1.95794	404	26	0	[-2.555196]
405	53.6333	0	-2.99322	406	130.5	0	-6.09056	405	3.96667	0	-1.9568	405	50	0	[-2.5493891]
406	24.2667	0	-2.98934	407	96.3	0	-6.08946	406	32.2333	0	-1.94944	406	61	0	[-2.5493124]
407	120.533	0	-2.98803	408	69.2333	0	-6.08837	407	49.1333	0	-1.94791	407	48	0	[-2.5450704]
408	75.5667	0	-2.98719	409	12.7667	0	-6.08757	408	54.4333	0	-1.94652	408	74	0	[-2.542741]
409	35.9	0	-2.98354	410	111.033	0	-6.08584	409	203.967	0	-1.94641	409	67	0	[-2.5392342]
410	35.0333	0	-2.98314	411	12.3333	0	-6.08257	410	47	0	-1.94626	410	29	0	[-2.5359066]
411	99.1	0	-2.98228	412	158.233	0	-6.0817	411	52.7333	0	-1.94063	411	29	0	[-2.535682]
412	12.2	0	-2.98034	413	0.766667	0	-6.08057	412	28.1667	0	-1.93153	412	84	0	[-2.5292501]
413	53.7667	0	-2.97175	414	33.8	0	-6.08015	413	59.5333	1	-1.93148	413	12	1	[-2.5289862]
414	36.4667	0	-2.96856	415	111.833	0	-6.07886	414	36.4	0	-1.93011	414	41	0	[-2.5219433]
415	6.26667	0	-2.967	416	6.06667	0	-6.07815	415	12	0	-1.92834	415	77	0	[-2.5197618]
416	105.767	0	-2.9645	417	96.3	0	-6.07334	416	62.3667	0	-1.9277	416	0	0	[-2.5186517]
417	5.6	0	-2.9608	418	34	0	-6.06967	417	67.2	0	-1.92651	417	86	0	[-2.5169642]
418	36.4667	0	-2.96066	419	31.8667	0	-6.06443	418	136.167	0	-1.92641	418	47	0	[-2.5143626]
419	36.3667	0	-2.96048	420	45.0667	0	-6.0644	419	26.0333	0	-1.92638	419	62	0	[-2.513184]
420	32.6	0	-2.95977	421	118.333	0	-6.06195	420	114.333	0	-1.92578	420	28	0	[-2.5027118]
421	112.067	0	-2.95881	422	58.8	0	-6.06177	421	147.567	0	-1.925	421	38	0	[-2.502271]
422	10.7333	0	-2.95621	423	91	0	-6.05657	422	73.3333	0	-1.92355	422	56	0	[-2.4990025]
423	3.03333	0	-2.95367	424	10	0	-6.05098	423	82.7667	0	-1.92308	423	44	0	[-2.498992]
424	61.4667	0	-2.95247	425	8.96667	0	-6.05034	424	92.1333	0	-1.91114	424	72	0	[-2.4973428]
425	32.9667	0	-2.95227	426	166.367	0	-6.04957	425	41.7333	0	-1.90956	425	43	0	[-2.4945793]
426	49.1333	0	-2.95139	427	57.6333	0	-6.04721	426	89.7	0	-1.90782	426	45	0	[-2.4944317]
427	14	0	-2.95008	428	49.2333	0	-6.04498	427	118.533	0	-1.89966	427	40	0	[-2.4919508]
428	25.4667	0	-2.9498	429	73.5333	0	-6.04106	428	104.767	0	-1.89951	428	50	0	[-2.4878159]
429	15.4	0	-2.94678	430	72.6333	0	-6.04062	429	64.6	0	-1.89932	429	80	0	[-2.4875753]
430	52.2	0	-2.94589	431	26.9667	0	-6.0344	430	53.8667	0	-1.8987	430	30	0	[-2.4875224]
431	37.5	0	-2.94563	432	57.3333	0	-6.03395	431	131.8	0	-1.89534	431	47	0	[-2.485445]
432	56.9667	0	-2.94403	433	32.9667	0	-6.03373	432	44	0	-1.88869	432	68	0	[-2.4786696]
433	5.83333	0	-2.94326	434	95.0667	0	-6.03199	433	107.3	0	-1.88672	433	37	0	[-2.4762669]
434	32.4	0	-2.93826	435	55.8	0	-6.0314	434	113.6	0	-1.88197	434	76	0	[-2.4752822]
435	85.9333	0	-2.9382	436	49.7	0	-6.02591	435	108.733	0	-1.8794	435	20	0	[-2.466141]
436	8.66667	0	-2.93354	437	3.1	0	-6.02527	436	122.533	0	-1.87721	436	24	0	[-2.462486]
437	1.7	0	-2.93159	438	126.633	0	-6.02293	437	53.2333	0	-1.87375	437	51	0	[-2.4619896]
438	44.0667	0	-2.93029	439	5.4	0	-6.02274	438	80.7	0	-1.85862	438	57	0	[-2.4593725]
439	55.4667	0	-2.92993	440	47.5333	0	-6.01427	439	100.1	0	-1.85793	439	3	0	[-2.4489408]
440	75.5667	0	-2.92289	441	131.833	0	-6.01387	440	28	0	-1.85577	440	58	0	[-2.447638]
441	36.2333	0	-2.9228	442	25.0667	0	-6.01019	441	41.5667	0	-1.85496	441	42	0	[-2.4442594]
442	5.43333	0	-2.91815	443	156.867	0	-6.00845	442	88.0667	0	-1.8534	442	65	1	[-2.4388502]
443	3.53333	0	-2.91737	444	123.433	1	-6.00557	443	108.133	0	-1.84856	443	55	0	[-2.4385278]
444	28.8	0	-2.91096	445	51.4	0	-6.00482	444	10.4333	0	-1.84529	444	68	0	[-2.4381344]
445	11.5333	0	-2.90424	446	31.5	0	-6.00125	445	40.5667	0	-1.84255	445	55	0	[-2.4376915]
446	96.5667	0	-2.90031	447	82.1333	0	-5.99854	446	71.8333	0	-1.84163	446	47	0	[-2.4351718]
447	76.3	0	-2.89836	448	60.7	0	-5.99294	447	155.967	0	-1.83667	447	69	0	[-2.4308693]
448	57.1667	0	-2.89821	449	125.5	0	-5.99256	448	143.933	0	-1.83622	448	10	0	[-2.4271781]
449	14.7	0	-2.89707	450	39.3	0	-5.99066	449	35.7	0	-1.83411	449	76	0	[-2.4256604]
450	113.233	0	-2.89494	451	65.9	0	-5.98838	450	39.3333	0	-1.83192	450	22	0	[-2.4210315]
451	111.333	0	-2.89421	452	25.4667	0	-5.98126	451	113.633	0	-1.82946	451	12	0	[-2.4203007]
452	5.96667	0	-2.89403	453	3.26667	0	-5.98029	452	61.7667	0	-1.82624	452	66	0	[-2.4198973]
453	50.3667	0	-2.89331	454	155.133	0	-5.97482	453	109.767	0	-1.82557	453	105	0	[-2.4162533]
454	8.76667	0	-2.8913	455	80.7	0	-5.96746	454	25.5333	0	-1.82496	454	45	0	[-2.4142244]
455	100.967	0	-2.89126	456	101.267	0	-5.96725	455	58.6667	0	-1.82138	455	28	0	[-2.4070418]
456	138.867	0	-2.88846	457	31.4333	0	-5.96439	456	54.7	0	-1.82129	456	10	0	[-2.4043357]
457	90.2	0	-2.88491	458	121.2	0	-5.96131	457	98.8333	0	-1.82104	457	39	0	[-2.4029891]
458	49.4	0	-2.88487	459	133.133	0	-5.95932	458	11.8333	0	-1.8173	458	47	0	[-2.4029586]
459	111.9	0	-2.87855	460	58.8	0	-5.95238	459	108.467	0	-1.81628	459	47	0	[-2.3964984]
460	95.9	0	-2.87538	461	98.7	0	-5.95234	460	9.56667	0	-1.81474	460	23	0	[-2.3901923]
461	7.2	0	-2.87187	462	138.9	0	-5.94636	461	27.8333	1	-1.80983	461	32	0	[-2.38602]
462	104.8	0	-2.86849	463	154.267	0	-5.94619	462	34.3	0	-1.80902	462	73	0	[-2.383175]
463	6.76667	0	-2.86731	464	39.2333	0	-5.94464	463	121.933	0	-1.80771	463	26	0	[-2.3811991]
464	10.5667	0	-2.86684	465	181.3	0	-5.93962	464	36.4	0	-1.80566	464	42	0	[-2.378807]
465	28.8	0	-2.86678	466	109.7	0	-5.93324	465	11.5667	0	-1.80366	465	62	0	[-2.378581]
466	10.1333	0	-2.86503	467	3.26667	0	-5.92824	466	61.1333	1	-1.80189	466	76	0	[-2.3717496]
467	125.533	0	-2.86374	468	73.4667	0	-5.92762	467	121.367	0	-1.80044	467	60	0	[-2.3705292]
468	8.76667	0	-2.86346	469	116.6	0	-5.92691	468	131.9	0	-1.79486	468	2	0	[-2.3681836]
469	64.6667	0	-2.85474	470	33.9667	0	-5.92427	469	26.9333	0	-1.79471	469	78	0	[-2.3673658]
470	116.3	0	-2.85437	471	79.4	0	-5.91805	470	59.0333	0	-1.78759	470	68	0	[-2.3646283]
471	119.433	1	-2.85395	472	109.4	0	-5.91647	471	27	0	-1.78476	471	47	0	[-2.3582437]
472	68.3667	0	-2.85341	473	16.1	0	-5.91619	472	52	0	-1.78401	472	58	0	[-2.356902]
473	97.6333	0	-2.84667	474	52.5333	0	-5.91266	473	84.2	0	-1.77863	473	73	0	[-2.350328]
474	25.2	0	-2.83416	475	5.33333	0	-5.91158	474	96.3333	0	-1.77396	474	10	0	[-2.3474345]
475	12.4	0	-2.83151	476	11.1333	0	-5.90723	475	52.4667	0	-1.77253	475	49	0	[-2.3328452]
476	25.2	0	-2.82465	477	54	0	-5.90531	476	5.56667	0	-1.77033	476	27	0	[-2.330157]
477	120.733	1	-2.82427	478	126.367	0	-5.90152	477	6.2	0	-1.76897	477	57	0	[-2.3292487]
478	2.76667	0	-2.82045	479	34.1333	0	-5.89792	478	111.267	0	-1.76798	478	50	0	[-2.3292458]
479	92.7333	0	-2.8198	480	68.6	0	-5.89512	479	37.3	0	-1.76585	479	73	0	[-2.3270977]
480	105	0	-2.81031	481	11.8	0	-5.89352	480	91.6667	0	-1.75992	480	80	0	[-2.321811]
481	56.4333	0	-2.80778	482	111.5	0	-5.89304	481	12.9333	0	-1.7582	481	74	0	[-2.3177674]
482	70.1	0	-2.80759	483	95.2	0	-5.89036	482	57.9667	0	-1.75352	482	80	0	[-2.3171544]
483	72.0667	0	-2.79989	484	79.4333	0	-5.89029	483	63.5	0	-1.74554	483	52	0	[-2.316388]
484	81.8333	0	-2.79907	485	31.9333	0	-5.8883	484	75.2	0	-1.74492	484	77	0	[-2.3155706]
485	37.6333	0	-2.79758	486	9.06667	0	-5.88732	485	56.4667	0	-1.73512	485	58	0	[-2.3095129]
486	86.6333	0	-2.79675	487	5.36667	0	-5.88593	486	34.6333	0	-1.73437	486	41	0	[-2.3081434]
487	97.9	0	-2.79664	488	137.833	0	-5.88467	487	108.4	0	-1.73104	487	56	0	[-2.305945]
488	5.96667	0	-2.79613	489	9.36667	0	-5.87783	488	1.4	0	-1.72601	488	66	0	[-2.3015182]
489	5.66667	0	-2.79392	490	12.4333	0	-5.87506	489	55.1	0	-1.72601	489	37	0	[-2.2911487]
490	73.9333	0	-2.79246	491	55.4333	0	-5.87366	490	93.7667	0	-1.72366	490	23	0	[-2.290996]
491	57.6	0	-2.79049	492	5.03333	0	-5.86826	491	97.3333	0	-1.7216	491	47	0	[-2.2814424]
492	50.9333	0	-2.7898	493	17.1667	0	-5.86589	492	38.9333	0	-1.72036	492	35	0	[-2.279867]
493	61.7667	0	-2.7897	494	30.5667	0	-5.86525	493	113.7	0	-1.715	493	36	0	[-2.2789996]
494	80.7667	0	-2.78874	495	40.7	1	-5.86157	494	185.6	0	-1.71058	494	33	0	[-2.274483]
495	7.1	0	-2.7851	496	27.7333	0	-5.86031	495	56.4667	0	-1.70279	495	52	0	[-2.2739236]
496	37.2333	0	-2.78389	497	9.06667	0	-5.84497	496	30.2333	0	-1.69609	496	75	0	[-2.2734687]
497	35.9667	0	-2.7832	498	34.3	0	-5.84287	497	55.9333	0	-1.69596	497	86	0	[-2.2706368]
498	130.2	0	-2.78107	499	10.7	0	-5.83843	498	104.133	0	-1.69455	498	40	0	[-2.2640758]
499	128.433	1	-2.78007	500	105	0	-5.8374	499	25.3333	0	-1.69329	499	53	0	[-2.2638113]
500	155.133	1	-2.77564	501	15.4	0	-5.83484	500	29.2667	0	-1.68462	500	57	0	[-2.2547324]
501	31.5	0	-2.77237	502	52.3	0	-5.82648	501	38.0667	0	-1.68341	501	66	0	[-2.2526891]
502	60.9	0	-2.77197	503	36.4667	0	-5.81471	502	116.333	0	-1.68321	502	39	0	[-2.2519114]
503	102.133	0	-2.77049	504	8.63333	0	-5.8111	503	122.467	0	-1.68129	503	60	0	[-2.2495666]
504	59.9	0	-2.76666	505	71.4667	0	-5.80625	504	12.2333	0	-1.67917	504	64	0	[-2.243641]
505	3.23333	0	-2.76565	506	3.26667	0	-5.80266	505	156.667	0	-1.67371	505	33	0	[-2.239023]
506	41.1	0	-2.76469	507	6.3	0	-5.79636	506	90.9667	1	-1.67351	506	79	0	[-2.232178]
507	37.8	0	-2.76288	508	3.53333	0	-5.79439	507	38.3	1	-1.67143	507	37	0	[-2.2246532]
508	12.5667	0	-2.76116	509	25.2667	0	-5.79313	508	131.433	0	-1.66969	508	39	0	[-2.2167697]
509	13.8667	0	-2.76024	510	51.3667	0	-5.79179	509	49.0333	0	-1.66683	509	24	0	[-2.216388]
510	58.1333	0	-2.75887	511	126.9	0	-5.78512	510	6.76667	0	-1.65405	510	48	0	[-2.2147813]
511	28.5667	0	-2.75548	512	92.9	0	-5.78406	511	52.6	0	-1.65386	511	41	0	[-2.2071664]
512	146.567	0	-2.75495	513	46.3	0	-5.77765	512	63.2	0	-1.64404	512	60	0	[-2.2052228]
513	112.933	0	-2.75215	514	97.0667	0	-5.77454	513	1.2	0	-1.64217	513	2	0	[-2.2039425]
514	79.8333	0	-2.75012	515	61.3667	0	-5.77417	514	73.9667	0	-1.64124	514	68	0	[-2.2035515]
515	59.8333	0	-2.73779	516	2.1	0	-5.77188	515	134.7	0	-1.63894	515	106	0	[-2.200806]
516	132.3	0	-2.72747	517	103.667	0	-5.76896	516	11.4333	0	-1.63889	516	53	0	[-2.1898768]
517	4.56667	0	-2.72367	518	8.93333	0	-5.76754	517	123.833	0	-1.6279	517	73	0	[-2.1849785]
518	33.1	0	-2.71701	519	120.433	0	-5.76705	518	135.8	0	-1.62568	518	98	0	[-2.1836755]
519	36.2	0	-2.71224	520	59.2	0	-5.76455	519	35.8333	0	-1.62381	519	69	0	[-2.1816747]
520	54.1	0	-2.71102	521	25.4667	0	-5.75467	520	55.1	1	-1.61104	520	54	0	[-2.1758049]
521	50.5333	0	-2.70964	522	108.7	0	-5.75196	521	48.4667	0	-1.60762	521	54	0	[-2.1679366]
522	15.6333	0	-2.70728	523	71.8333	0	-5.74832	522	15.0333	0	-1.60229	522	38	0	[-2.165558]
523	8.13333	0	-2.7066	524	11.7667	0	-5.74569	523	173.2	0	-1.59964	523	80	0	[-2.1613858]
524	17.1333	0	-2.70486	525	103.667	0	-5.731	524	4.93333	0	-1.59873	524	55	0	[-2.1597733]
525	3.66667	0	-2.70266	526	63.7	1	-5.72317	525	46.9	0	-1.59518	525	28	0	[-2.1593091]
526	63.6333	0	-2.70119	527	37.0333	0	-5.71704	526	45	0	-1.59188	526	52	0	[-2.1549509]
527	35.6	0	-2.69521	528	80.1667	0	-5.71399	527	116.133	0	-1.59124	527	61	0	[-2.1546745]
528	10.7333	0	-2.69018	529	128.6	0	-5.71035	528	52.8	0	-1.58838	528	39	0	[-2.1502278]
529	148.667	0	-2.68845	530	54.3333	0	-5.70793	529	54.5667	0	-1.58738	529	74	0	[-2.1436737]
530	27.2	0	-2.68778	531	31.7333	0	-5.70718	530	129.033	0	-1.58536	530	53	0	[-2.1419914]
531	66.5	0	-2.68627	532	75.4	0	-5.70563	531	88.7	0	-1.58479	531	27	1	[-2.1407635]
532	86.1333	0	-2.68491	533	72.5	0	-5.70415	532	63.2667	0	-1.58461	532	53	0	[-2.1398654]
533	55.4667	0	-2.67976	534	32.6667	0	-5.70339	533	157.767	0	-1.58108	533	80	0	[-2.1317153]
534	145.9	0	-2.67935	535	158.167	0	-5.70185	534	60.2333	1	-1.57429	534	90	0	[-2.1300006]
535	126.633	0	-2.67829	536	123.9	0	-5.69312	535	35.8667	0	-1.57361	535	40	0	[-2.1276405]
536	157.567	0	-2.67263	537	56.7	0	-5.6908	536	121.033	0	-1.57336	536	51	0	[-2.1267703]
537	35.5667	0	-2.6672	538	107.767	1	-5.68594	537	111.867	0	-1.56817	537	63	0	[-2.1228762]
538	8.2	0	-2.66693	539	36.8667	0	-5.68441	538	72.0333	0	-1.55255	538	44	0	[-2.121874]
539	53.1	0	-2.6669	540	102.633	0	-5.68374	539	85.5333	0	-1.55236	539	78	0	[-2.1189318]
540	8.13333	0	-2.66265	541	85.2	0	-5.67929	540	1.56667	0	-1.55055	540	38	0	[-2.118513]
541	158.133	0	-2.66178	542	3.23333	0	-5.67536	541	35.9667	0	-1.54853	541	64	0	[-2.1161654]
542	90.1333	0	-2.65673	543	4.56667	0	-5.66875	542	78.4	0	-1.5485	542	107	0	[-2.1146717]
543	29.9	0	-2.65203	544	35.4667	0	-5.66013	543	3.03333	0	-1.54241	543	41	0	[-2.1109731]
544	21.7333	0	-2.64994	545	122.167	0	-5.65199	544	61.6	0	-1.54088	544	114	0	[-2.1082942]
545	130.1	0	-2.64856	546	77.4667	0	-5.6468	545	36.2333	0	-1.53657	545	34	0	[-2.1079166]
546	7	0	-2.64778	547	135.133	0	-5.64155	546	49	0	-1.53371	546	75	0	[-2.1062038]
547	49.9	0	-2.64546	548	4.5	0	-5.64125	547	62.1667	0	-1.53335	547	48	0	[-2.098831]
548	29.4333	1	-2.64361	549	109	0	-5.64058	548	6.86667	0	-1.53265	548	45	0	[-2.088671]
549	133.8	0	-2.64055	550	120.767	0	-5.63736	549	45.5	0	-1.53166	549	19	1	[-2.082484]
550	114.367	0	-2.63954	551	61.8	1	-5.63361	550	57.6667	1	-1.52877	550	65	0	[-2.0806954]
551	95.7333	0	-2.63949	552	68.2667	0	-5.63336	551	2.53333	0	-1.52829	551	60	0	[-2.0758302]
552	129.867	0	-2.6368	553	12	0	-5.63144	552	125.267	0	-1.52727	552	46	0	[-2.0753639]
553	95.8	0	-2.63604	554	35.9	0	-5.6261	553	2.26667	0	-1.52101	553	49	0	[-2.0745008]
554	37.2333	0	-2.6338	555	118.9	0	-5.61741	554	112.733	0	-1.52003	554	54	0	[-2.072128]
555	57.3333	0	-2.63368	556	13.2	0	-5.61613	555	34.5	0	-1.51299	555	65	0	[-2.0720856]
556	59.4667	0	-2.63227	557	93.1	1	-5.6133	556	52.5333	0	-1.51116	556	48	0	[-2.071328]
557	12.0667	0	-2.6312	558	12.0667	0	-5.61031	557	121.967	0	-1.50496	557	68	0	[-2.0632782]
558	38.4667	0	-2.62633	559	25.5	0	-5.61017	558	12.6333	0	-1.49248	558	38	0	[-2.061341]
559	17.4667	0	-2.61925	560	9.1	0	-5.60676	559	37.6	0	-1.49111	559	50	0	[-2.0599105]
560	35.7333	0	-2.61837	561	47.9333	0	-5.60247	560	143.333	0	-1.48949	560	95	0	[-2.0578446]
561	52.2667	0	-2.61438	562	83.1333	0	-5.59846	561	97.5	0	-1.48939	561	73	0	[-2.048963]
562	38.2	0	-2.61393	563	115.133	0	-5.59068	562	99.1	0	-1.48183	562	48	0	[-2.0487306]
563	65.6667	0	-2.60715	564	28.4333	0	-5.5882	563	61.2333	0	-1.47649	563	42	1	[-2.0405357]
564	3.73333	0	-2.60659	565	82.6	0	-5.57954	564	55.8	0	-1.47437	564	46	0	[-2.0397813]
565	25.2	0	-2.60562	566	85.9	0	-5.57777	565	182.667	0	-1.47125	565	54	0	[-2.0388262]
566	58.7	0	-2.60103	567	3.03333	0	-5.57556	566	99.7667	0	-1.47114	566	60	0	[-2.0387485]
567	78.8	0	-2.59717	568	33.0333	0	-5.57476	567	115.767	0	-1.46887	567	78	0	[-2.0379455]
568	35.1	0	-2.59568	569	33.5667	0	-5.57288	568	116.833	0	-1.46881	568	60	0	[-2.0283387]
569	66.5333	0	-2.59331	570	11.2667	0	-5.56735	569	125	0	-1.46103	569	78	0	[-2.0164218]
570	148.533	0	-2.59111	571	61.3667	0	-5.56614	570	45.8333	0	-1.45906	570	47	0	[-2.0102975]
571	11.4667	0	-2.58604	572	105.033	0	-5.56247	571	130.967	0	-1.4556	571	73	0	[-1.9996562]
572	35.8	0	-2.58402	573	59.3	0	-5.55664	572	31	0	-1.45411	572	50	0	[-1.9928786]
573	133.467	0	-2.57864	574	9.8	0	-5.55025	573	111.067	0	-1.4488	573	52	0	[-1.9911394]
574	122.4	0	-2.57799	575	10.2333	0	-5.54232	574	33.9333	0	-1.44023	574	59	0	[-1.9872917]
575	146.233	0	-2.57771	576	69.4333	0	-5.51015	575	63.4333	0	-1.43964	575	76	0	[-1.970759]
576	3.63333	0	-2.57271	577	47.6667	0	-5.50806	576	14.7667	0	-1.43444	576	46	0	[-1.9699628]
577	48.9333	0	-2.57208	578	17.9333	0	-5.50454	577	96.2333	0	-1.43354	577	57	0	[-1.9652768]
578	168.067	0	-2.56963	579	2.93333	0	-5.50302	578	123.4	0	-1.43275	578	3	0	[-1.9566131]
579	25.4	0	-2.56871	580	44.5	1	-5.49648	579	76.9333	0	-1.43101	579	27	0	[-1.9565433]
580	53.4667	0	-2.56462	581	40.5	1	-5.48238	580	61.4	0	-1.43037	580	2	0	[-1.9464476]
581	37.1	0	-2.56446	582	106.667	0	-5.48008	581	126.633	0	-1.42708	581	1	0	[-1.946063]
582	113.5	0	-2.56242	583	78.1	0	-5.47752	582	120.433	0	-1.42181	582	32	0	[-1.9458561]
583	80.9333	0	-2.55265	584	60.0667	0	-5.47678	583	11	0	-1.41879	583	47	0	[-1.938494]
584	56.4333	0	-2.55135	585	72.5333	0	-5.47675	584	30.3667	0	-1.41029	584	44	0	[-1.9360042]
585	7.56667	0	-2.55122	586	136.067	0	-5.47567	585	36.4667	0	-1.4099	585	50	0	[-1.9341061]
586	145.067	0	-2.55083	587	11.7	0	-5.47076	586	63.9	0	-1.40774	586	54	0	[-1.9309254]
587	36.7667	0	-2.55076	588	72.2667	0	-5.46316	587	3.76667	0	-1.40751	587	64	0	[-1.9240856]
588	60.9	0	-2.5465	589	45.9333	0	-5.45168	588	151.333	0	-1.40264	588	67	0	[-1.923214]
589	36.9667	0	-2.53839	590	75.9	0	-5.4515	589	7.03333	0	-1.40239	589	53	0	[-1.9215246]
590	2.1	0	-2.53795	591	106.167	0	-5.45034	590	104.333	0	-1.39638	590	83	0	[-1.921324]
591	38.9667	0	-2.5378	592	56.7333	0	-5.44545	591	108.833	0	-1.3936	591	58	0	[-1.9209982]
592	100.267	0	-2.53535	593	12.1333	0	-5.4249	592	12.9333	0	-1.38895	592	19	1	[-1.9196917]
593	69.6	0	-2.53377	594	60.4	0	-5.41592	593	7.73333	0	-1.3865	593	2	0	[-1.915945]
594	12.5	0	-2.5312	595	76.2	0	-5.41537	594	80.2333	0	-1.38412	594	2	0	[-1.9134191]
595	32	0	-2.5304	596	34.5667	0	-5.41476	595	98.7333	0	-1.3827	595	56	0	[-1.9124763]
596	3	0	-2.5291	597	3.23333	0	-5.41373	596	144.467	0	-1.3826	596	62	0	[-1.9116437]
597	67.9667	0	-2.52814	598	83.9333	0	-5.40892	597	98.3333	0	-1.38051	597	61	0	[-1.9010471]
598	119.667	0	-2.52678	599	127.633	0	-5.40768	598	159.333	0	-1.38047	598	54	0	[-1.8961656]
599	66	0	-2.52623	600	89.3	0	-5.40597	599	65.1667	0	-1.37893	599	25	1	[-1.8946186]
600	108.8	0	-2.52611	601	5.6	0	-5.40431	600	100.533	0	-1.3784	600	65	0	[-1.8922201]
601	11.7	0	-2.5201	602	26.8667	0	-5.40122	601	98.7	0	-1.37644	601	38	0	[-1.8886195]
602	5.83333	0	-2.51962	603	88.4333	0	-5.3952	602	83.3667	0	-1.37598	602	36	0	[-1.8875254]
603	25.0333	0	-2.5174	604	35.8333	0	-5.39475	603	5.73333	0	-1.37352	603	12	0	[-1.8839049]
604	36.1333	0	-2.51546	605	116.367	0	-5.3785	604	142.3	0	-1.36933	604	32	1	[-1.8756777]
605	28.7667	0	-2.5154	606	93.9333	0	-5.37449	605	84.3667	0	-1.36807	605	56	0	[-1.8711578]
606	139.767	0	-2.51465	607	73.7333	0	-5.37189	606	167.7	0	-1.36747	606	80	0	[-1.8699288]
607	37.4667	0	-2.50935	608	3.56667	0	-5.37072	607	79.5	0	-1.36416	607	60	0	[-1.8682317]
608	4.56667	0	-2.50878	609	46.2667	0	-5.36825	608	33.9	0	-1.35958	608	25	0	[-1.8653765]
609	55.3	0	-2.50433	610	3.26667	0	-5.36818	609	87.9	0	-1.35851	609	30	0	[-1.8541057]
610	57.6333	0	-2.50146	611	42.6333	0	-5.34414	610	18.2	0	-1.35659	610	50	0	[-1.8471203]
611	152.3	0	-2.50002	612	71.8333	1	-5.34043	611	14.4333	0	-1.35556	611	37	0	[-1.8467469]
612	98.1667	0	-2.49817	613	7.96667	0	-5.34033	612	91.4667	0	-1.35246	612	83	0	[-1.8460836]
613	3.5	0	-2.49745	614	9.56667	0	-5.33981	613	4.4	0	-1.34756	613	1	0	[-1.8427558]
614	55.6333	0	-2.49543	615	86.2667	0	-5.33461	614	100.767	0	-1.34341	614	47	0	[-1.8372285]
615	59.7667	0	-2.49242	616	98.0333	0	-5.33209	615	33.3333	0	-1.34183	615	63	0	[-1.8325616]
616	58.1	0	-2.49235	617	33.6333	0	-5.33181	616	10	0	-1.33585	616	48	0	[-1.8264468]
617	111.9	0	-2.49021	618	83.5333	0	-5.32081	617	24.2	0	-1.33421	617	66	0	[-1.8256855]
618	7.66667	0	-2.48931	619	123.7	0	-5.32014	618	111.367	0	-1.33069	618	79	0	[-1.8191048]
619	120.233	0	-2.48848	620	13.9667	0	-5.3191	619	108.5	0	-1.32681	619	73	0	[-1.8145107]
620	59.9333	0	-2.48566	621	36.8	0	-5.3191	620	87.4667	0	-1.32192	620	50	0	[-1.8126]
621	9.1	0	-2.48132	622	73.0333	0	-5.31468	621	97.1	0	-1.31947	621	58	0	[-1.8022952]
622	52.7333	0	-2.47836	623	4	0	-5.3132	622	47.1667	0	-1.30882	622	39	0	[-1.7955492]
623	5.3	0	-2.47403	624	55.2333	0	-5.30674	623	4.36667	0	-1.30412	623	57	0	[-1.7832131]
624	137.133	0	-2.47355	625	36.6667	0	-5.3017	624	113.8	0	-1.30172	624	66	0	[-1.7805121]
625	24.0333	0	-2.47279	626	2.6	0	-5.30145	625	97.9333	0	-1.29187	625	54	0	[-1.7785447]
626	55.8333	1	-2.46676	627	126.3	0	-5.29716	626	74.3667	0	-1.28622	626	51	0	[-1.7751725]
627	26.6	0	-2.463	628	34.7667	0	-5.28933	627	51.8	0	-1.28191	627	53	0	[-1.7751347]
628	11.0667	0	-2.46048	629	104.033	0	-5.28738	628	133.333	0	-1.28134	628	47	0	[-1.7745035]
629	56.0333	0	-2.45887	630	3.43333	0	-5.28657	629	2.96667	0	-1.281	629	34	0	[-1.7735913]
630	131.8	0	-2.4587	631	96.3333	0	-5.27861	630	72.4	0	-1.27664	630	48	0	[-1.7690618]
631	3	0	-2.45707	632	97.3333	0	-5.27856	631	112.967	0	-1.27647	631	78	0	[-1.7653897]
632	121.333	0	-2.45637	633	17.0333	0	-5.27852	632	3.56667	0	-1.27324	632	72	0	[-1.7622199]
633	54.5667	0	-2.45469	634	118.767	0	-5.27746	633	37.2	0	-1.27324	633	62	0	[-1.7589815]
634	4.26667	0	-2.45224	635	121.633	0	-5.27424	634	97.8333	1	-1.27235	634	60	0	[-1.7446036]
635	63.7333	0	-2.45172	636	11.6333	0	-5.26936	635	138.767	0	-1.26696	635	42	0	[-1.7383301]
636	67.8667	0	-2.45079	637	79.3333	0	-5.26739	636	13.7667	0	-1.26401	636	45	0	[-1.7358334]
637	80.9667	0	-2.45014	638	55.6333	0	-5.26376	637	98.3333	0	-1.26166	637	25	0	[-1.7337756]
638	2.96667	0	-2.44873	639	60.4667	0	-5.26007	638	60.8	0	-1.26052	638	62	0	[-1.7332189]
639	33.2667	0	-2.43985	640	93.2333	0	-5.25815	639	113.233	0	-1.25961	639	61	0	[-1.7314458]
640	84.5667	0	-2.43265	641	50.7333	0	-5.25762	640	51.6333	0	-1.25471	640	60	0	[-1.7286166]
641	80.3667	0	-2.43167	642	55.1333	0	-5.25509	641	50.9	0	-1.25224	641	95	0	[-1.7243721]
642	37.9667	0	-2.4231	643	60.0667	0	-5.25388	642	36.4	0	-1.25172	642	51	0	[-1.7239053]
643	107.4	0	-2.42017	644	75.8333	0	-5.24572	643	31.5	0	-1.24535	643	48	0	[-1.720254]
644	62.4	0	-2.41955	645	8.33333	0	-5.24556	644	101.333	0	-1.24221	644	50	0	[-1.7199271]
645	105	0	-2.41896	646	3.46667	0	-5.24171	645	103.533	0	-1.23887	645	57	0	[-1.7167121]
646	148.533	0	-2.41879	647	88.9333	0	-5.23691	646	45.3	0	-1.23641	646	51	0	[-1.7152076]
647	130.433	0	-2.41414	648	6.06667	0	-5.23614	647	74.3667	1	-1.23626	647	75	0	[-1.7088156]
648	141.567	0	-2.41347	649	51.6	0	-5.23059	648	117.367	0	-1.23616	648	82	0	[-1.7042017]
649	66.8667	0	-2.40841	650	32.1667	0	-5.22539	649	83.9333	0	-1.22926	649	6	0	[-1.6997006]
650	143.967	0	-2.40432	651	56.5333	0	-5.20918	650	5.23333	0	-1.22592	650	101	0	[-1.6976615]
651	3.93333	0	-2.40201	652	134.267	0	-5.20899	651	120.933	0	-1.22178	651	67	0	[-1.6922872]
652	5.66667	0	-2.40196	653	171.467	0	-5.20566	652	111.7	0	-1.21885	652	54	0	[-1.6922823]
653	32.9	0	-2.3999	654	36.2667	0	-5.20456	653	3.03333	0	-1.21771	653	53	0	[-1.6839912]
654	58.5	0	-2.39586	655	88.4333	0	-5.19885	654	166.033	1	-1.21744	654	18	0	[-1.6714876]
655	109.2	0	-2.39436	656	96.7	0	-5.19062	655	10.2	0	-1.19839	655	31	0	[-1.6650982]
656	12.8667	0	-2.39206	657	6.06667	0	-5.19007	656	28.2333	0	-1.19229	656	110	0	[-1.6635387]
657	113.9	0	-2.39056	658	11.6	0	-5.18867	657	36	0	-1.19118	657	63	0	[-1.6621368]
658	10.6	0	-2.38885	659	61.1	1	-5.17753	658	81.5333	0	-1.18255	658	47	0	[-1.661097]
659	30.1	0	-2.38746	660	68.5667	0	-5.17452	659	3.03333	0	-1.18009	659	51	0	[-1.6607735]
660	36.1	0	-2.38492	661	92.6	1	-5.17422	660	107.933	0	-1.17699	660	68	0	[-1.6580496]
661	141.3	0	-2.38475	662	70.8	0	-5.17128	661	37.7	0	-1.17454	661	68	0	[-1.6555867]
662	53.1667	1	-2.38324	663	139.3	0	-5.16814	662	111.767	0	-1.17039	662	26	0	[-1.6528106]
663	12.5333	0	-2.37759	664	69.4333	0	-5.1672	663	134.633	0	-1.16897	663	62	0	[-1.6521778]
664	77.0667	0	-2.37634	665	59.3667	0	-5.1657	664	101.3	0	-1.16534	664	33	0	[-1.649389]
665	102.867	0	-2.36667	666	51.7667	0	-5.16089	665	34.4	0	-1.16527	665	61	0	[-1.6489136]
666	2.93333	0	-2.36664	667	19.5	0	-5.15771	666	57.1667	0	-1.16427	666	37	0	[-1.6436367]
667	92.4667	0	-2.36231	668	139.667	0	-5.14862	667	35.1	1	-1.15952	667	51	0	[-1.6435522]
668	58.4333	0	-2.35666	669	85.1	0	-5.14531	668	33.6	0	-1.15397	668	36	0	[-1.6435416]
669	58.5333	0	-2.35652	670	15.1667	0	-5.13549	669	53.2333	0	-1.15228	669	64	0	[-1.6427634]
670	47.2333	0	-2.35252	671	70.2	0	-5.13298	670	3.36667	0	-1.15204	670	25	0	[-1.6391884]
671	122.167	0	-2.35154	672	122.867	0	-5.1294	671	57.5	0	-1.1518	671	37	0	[-1.6322272]
672	79.8	0	-2.35112	673	5.6	0	-5.12752	672	6.73333	0	-1.14766	672	101	0	[-1.6316528]
673	2.13333	0	-2.34432	674	158.967	0	-5.11466	673	75.6667	0	-1.14423	673	21	1	[-1.627264]
674	146.367	0	-2.34095	675	109.633	0	-5.11368	674	123.033	0	-1.14327	674	54	0	[-1.6221026]
675	96.6333	0	-2.34017	676	30.2667	0	-5.11083	675	67.6	1	-1.13683	675	75	0	[-1.62165]
676	73.3333	0	-2.33973	677	93.4	0	-5.09923	676	104.567	0	-1.1328	676	45	0	[-1.621266]
677	51.2	0	-2.33939	678	92.7333	0	-5.09611	677	72.7667	0	-1.12393	677	52	0	[-1.6209157]
678	13.5	0	-2.33716	679	3.43333	0	-5.09543	678	141.833	0	-1.12061	678	51	0	[-1.6174049]
679	59.9667	0	-2.33474	680	37.7667	0	-5.0931	679	182.5	0	-1.12012	679	27	0	[-1.616751]
680	63.6667	0	-2.33199	681	111.833	0	-5.09265	680	84.4667	0	-1.11803	680	46	0	[-1.6166689]
681	59.8667	0	-2.33151	682	82.8667	0	-5.08501	681	162.533	0	-1.11401	681	51	0	[-1.6154621]
682	80.3333	0	-2.32663	683	2.8	0	-5.07871	682	76.3667	0	-1.11305	682	29	0	[-1.6139312]
683	83.7667	1	-2.32499	684	27.3333	0	-5.07053	683	90.0333	0	-1.10967	683	58	0	[-1.6127355]
684	46.4333	0	-2.32005	685	98.5	0	-5.06808	684	52.6667	0	-1.10933	684	22	1	[-1.6106083]
685	12.3667	0	-2.31788	686	12.2	0	-5.06761	685	55.2	0	-1.10781	685	19	0	[-1.6071091]
686	32	0	-2.31665	687	4.53333	0	-5.06632	686	30.0667	0	-1.10755	686	37	0	[-1.6062036]
687	36.4	0	-2.31422	688	59.7	0	-5.06283	687	18.2667	0	-1.10664	687	24	0	[-1.6045104]
688	4.43333	0	-2.31357	689	17.5	0	-5.04627	688	116.533	0	-1.10654	688	44	0	[-1.6042514]
689	96.4667	0	-2.31325	690	3.13333	0	-5.04469	689	12.8667	0	-1.10102	689	27	0	[-1.6013227]
690	3	0	-2.30583	691	103.033	0	-5.04168	690	94.2667	0	-1.10035	690	91	0	[-1.5977954]
691	132.067	0	-2.30403	692	27.8	1	-5.04118	691	5.73333	0	-1.09711	691	75	0	[-1.5876288]
692	35.6667	0	-2.3017	693	155.033	0	-5.03804	692	9.56667	0	-1.09378	692	78	0	[-1.5875752]
693	36	0	-2.30031	694	2.63333	0	-5.03508	693	31.3667	0	-1.09346	693	25	0	[-1.5825253]
694	60.4667	0	-2.29891	695	10.9333	0	-5.03029	694	11.6333	0	-1.09204	694	29	0	[-1.5823436]
695	3.7	0	-2.29846	696	180.033	0	-5.02491	695	15.8333	0	-1.08871	695	25	0	[-1.5822339]
696	55.1667	0	-2.29834	697	113.5	0	-5.02059	696	5.83333	0	-1.08818	696	16	1	[-1.5777898]
697	46.7333	1	-2.29351	698	62.8667	0	-5.01631	697	96.5333	0	-1.08709	697	4	0	[-1.572983]
698	54	0	-2.29077	699	121.6	0	-5.01623	698	55.0333	0	-1.08457	698	50	0	[-1.5701852]
699	56.9667	0	-2.28492	700	71.2	0	-5.01531	699	5.53333	0	-1.08389	699	65	0	[-1.5683285]
700	50.4	0	-2.28124	701	115.967	0	-5.01438	700	109.633	0	-1.08327	700	32	0	[-1.5683104]
701	15.1667	0	-2.2745	702	3.4	0	-5.01401	701	57.7	0	-1.08315	701	49	0	[-1.567433]
702	110.333	0	-2.27315	703	94.4	0	-5.01013	702	101.767	0	-1.07911	702	77	0	[-1.559002]
703	124.133	0	-2.26758	704	83.1	0	-5.00856	703	66.1667	0	-1.07434	703	72	0	[-1.5554068]
704	144.2	0	-2.26397	705	61.5667	0	-5.00435	704	7.9	0	-1.07252	704	86	0	[-1.553224]
705	122.3	0	-2.26245	706	90.9667	0	-4.9982	705	157.467	0	-1.06833	705	45	0	[-1.5478244]
706	10.2333	0	-2.25782	707	35.8667	0	-4.99146	706	41.9333	0	-1.06764	706	32	0	[-1.5426226]
707	51.1333	0	-2.25371	708	1.83333	0	-4.99107	707	46.4	0	-1.06277	707	44	0	[-1.5382935]
708	134.833	0	-2.25276	709	29.6333	0	-4.98954	708	5.53333	0	-1.06129	708	65	0	[-1.535425]
709	18.3667	0	-2.25254	710	67.7333	1	-4.98803	709	95.1	0	-1.06065	709	37	0	[-1.5351663]
710	4.3	0	-2.25148	711	133.1	0	-4.98211	710	6.83333	0	-1.05795	710	52	0	[-1.530853]
711	115.033	0	-2.24848	712	43.9333	0	-4.97112	711	35.7333	0	-1.0568	711	53	0	[-1.5241766]
712	139.667	0	-2.24833	713	35	0	-4.97041	712	86.6	0	-1.0567	712	21	0	[-1.5182784]
713	89.4	0	-2.24639	714	81.4667	1	-4.96731	713	2.16667	0	-1.05552	713	56	0	[-1.5175327]
714	103.1	0	-2.24161	715	91.8	0	-4.9554	714	48.7333	0	-1.05167	714	15	1	[-1.5172254]
715	102.367	0	-2.24003	716	91.0667	0	-4.9547	715	46.5333	0	-1.04993	715	75	0	[-1.5133609]
716	47.2	0	-2.23868	717	102	0	-4.95228	716	10.8	0	-1.04946	716	82	0	[-1.511091]
717	3.5	0	-2.23739	718	31.9667	0	-4.95203	717	28.2	0	-1.04934	717	47	0	[-1.5040107]
718	35.9667	0	-2.23461	719	10.7333	0	-4.94441	718	97.4	0	-1.04839	718	36	0	[-1.4984747]
719	46.7667	0	-2.23441	720	4.63333	0	-4.94341	719	39.9	0	-1.04803	719	28	0	[-1.4915308]
720	36.0667	0	-2.22821	721	36.8333	0	-4.94137	720	51.0667	0	-1.04143	720	62	0	[-1.4839962]
721	2.93333	0	-2.22511	722	5.76667	0	-4.93606	721	31.9667	0	-1.04101	721	31	0	[-1.4824455]
722	40.2333	1	-2.21453	723	28.3667	0	-4.92934	722	13.0333	0	-1.03577	722	38	0	[-1.4799821]
723	73.1	1	-2.21437	724	71.9667	0	-4.92767	723	5.96667	0	-1.03496	723	41	0	[-1.4737718]
724	60.2333	0	-2.21407	725	71.2	0	-4.92288	724	165.367	1	-1.03271	724	59	0	[-1.4689145]
725	89.4333	0	-2.21317	726	71.2667	1	-4.92099	725	86.8333	0	-1.03135	725	22	1	[-1.4679775]
726	132.733	0	-2.2063	727	89.3667	0	-4.91828	726	56.3333	0	-1.03061	726	26	0	[-1.4641285]
727	78.2333	0	-2.20576	728	100.4	0	-4.91328	727	12.3	0	-1.02734	727	47	0	[-1.4557843]
728	14.0667	0	-2.202	729	59.5	0	-4.90279	728	67.7667	0	-1.01951	728	7	0	[-1.4485306]
729	145.567	0	-2.19876	730	108.467	0	-4.90093	729	102.633	0	-1.01576	729	57	0	[-1.4456072]
730	11.7667	0	-2.1962	731	52.9333	0	-4.89757	730	11	0	-1.00933	730	29	0	[-1.4374837]
731	54.2333	0	-2.19134	732	143.4	0	-4.89715	731	60.8	0	-1.00794	731	47	0	[-1.4368726]
732	38.0333	0	-2.19	733	3	0	-4.88963	732	112.333	0	-1.0026	732	56	0	[-1.4348083]
733	12.7333	0	-2.18321	734	15.1667	0	-4.88876	733	176.867	0	-0.99972	733	30	0	[-1.4232349]
734	72.6	0	-2.16828	735	57.7333	0	-4.88016	734	31.0333	1	-0.995653	734	54	0	[-1.4185406]
735	20.9667	0	-2.16485	736	3.23333	0	-4.88015	735	88.6667	0	-0.98992	735	48	0	[-1.4178103]
736	73.6667	0	-2.16396	737	32.8	0	-4.86979	736	128.667	0	-0.984523	736	27	0	[-1.4115231]
737	89.1333	0	-2.15819	738	182	0	-4.85388	737	52.8333	0	-0.982633	737	5	0	[-1.4107573]
738	134.433	0	-2.15504	739	3.46667	0	-4.85352	738	129.333	0	-0.982593	738	39	0	[-1.4058042]
739	99.1333	0	-2.15449	740	7.13333	0	-4.84867	739	91.9	0	-0.976064	739	64	0	[-1.4028616]
740	38.8333	0	-2.1531	741	10.3	0	-4.84774	740	36.4333	0	-0.975234	740	75	0	[-1.3985636]
741	123.2	0	-2.15043	742	108.533	0	-4.83724	741	41.1667	0	-0.971565	741	30	0	[-1.3947573]
742	39.1333	0	-2.14562	743	48.1	0	-4.83429	742	100.533	0	-0.968769	742	65	0	[-1.3913643]
743	110.767	0	-2.14532	744	133.767	0	-4.81738	743	87.1	0	-0.968127	743	0	0	[-1.3907394]
744	59.1	0	-2.13974	745	11.8667	0	-4.81578	744	60.3	0	-0.967203	744	10	0	[-1.3886199]
745	35.3667	0	-2.13768	746	124.8	0	-4.81199	745	35.9	0	-0.967174	745	55	1	[-1.3876717]
746	96.6	0	-2.13225	747	96.1333	0	-4.81179	746	3	0	-0.965912	746	56	0	[-1.3866023]
747	79.3333	0	-2.13164	748	10.0333	0	-4.80256	747	73.6333	0	-0.965866	747	62	0	[-1.3822094]
748	115.4	0	-2.12525	749	4.7	0	-4.79841	748	97.0333	0	-0.961676	748	21	0	[-1.3812394]
749	84.0333	0	-2.12401	750	73.0667	0	-4.79537	749	77.9	0	-0.957738	749	14	0	[-1.377621]
750	144.1	1	-2.12115	751	5.83333	0	-4.79257	750	35.9	0	-0.954463	750	16	0	[-1.3719134]
751	92.6667	0	-2.11974	752	133.767	0	-4.78696	751	50.5	0	-0.953822	751	68	0	[-1.3698865]
752	26.2667	0	-2.11706	753	100.133	0	-4.78404	752	76.9667	0	-0.949541	752	101	0	[-1.3676612]
753	100.267	0	-2.11686	754	5.56667	0	-4.78263	753	7.43333	0	-0.948242	753	56	0	[-1.3641343]
754	120	0	-2.11457	755	111.7	1	-4.77224	754	103.4	0	-0.945064	754	8	0	[-1.3590648]
755	113.9	0	-2.11436	756	99.6667	0	-4.75758	755	2.9	0	-0.944571	755	59	0	[-1.358635]
756	95.6333	0	-2.10929	757	66.0333	0	-4.75328	756	141.733	0	-0.938332	756	51	0	[-1.357588]
757	60.3333	0	-2.10911	758	3.43333	0	-4.75204	757	100.567	0	-0.920034	757	63	0	[-1.3572793]
758	9.8	0	-2.10445	759	85.0667	1	-4.74526	758	13.8667	0	-0.918698	758	51	0	[-1.3547174]
759	124.567	0	-2.08949	760	40.3667	0	-4.74479	759	72.9667	0	-0.91861	759	48	0	[-1.3540747]
760	64.6	1	-2.08628	761	123.6	0	-4.73878	760	22.0333	1	-0.917952	760	51	0	[-1.3519459]
761	132.4	0	-2.08355	762	7.83333	0	-4.7382	761	83.1667	0	-0.9126	761	59	1	[-1.3500715]
762	64.6	1	-2.08351	763	69.6333	1	-4.73629	762	59.6667	0	-0.909442	762	67	0	[-1.3494128]
763	110.4	0	-2.08338	764	10.7	0	-4.72437	763	75.9	0	-0.904925	763	18	0	[-1.3443794]
764	35.2333	0	-2.08185	765	5.73333	0	-4.72285	764	37.9667	0	-0.904294	764	49	0	[-1.3438317]
765	14.8	0	-2.08176	766	171.733	0	-4.72264	765	3.76667	0	-0.902853	765	103	0	[-1.3421168]
766	36.1333	0	-2.08006	767	3.53333	0	-4.71714	766	96.3667	0	-0.897692	766	78	0	[-1.3402127]
767	37.0667	0	-2.0772	768	48.5667	0	-4.71499	767	113.567	1	-0.897516	767	0	0	[-1.3351564]
768	8.66667	0	-2.07431	769	102.467	0	-4.71134	768	129.233	0	-0.896765	768	50	0	[-1.3324203]
769	3.13333	0	-2.07417	770	83.2667	0	-4.70999	769	115.867	0	-0.88761	769	63	0	[-1.3251206]
770	101.133	0	-2.07318	771	50.1	0	-4.70139	770	8.13333	0	-0.882972	770	37	0	[-1.3249853]
771	11.5	0	-2.06948	772	145.633	0	-4.69828	771	83.3667	0	-0.882752	771	39	0	[-1.3221762]
772	2.9	0	-2.06795	773	78.4333	0	-4.69302	772	75.3667	0	-0.88213	772	60	0	[-1.3219271]
773	148.467	0	-2.06619	774	32.7667	0	-4.68846	773	103.133	0	-0.881296	773	56	0	[-1.3202128]
774	126	0	-2.06456	775	145.267	0	-4.68679	774	57.4667	0	-0.87921	774	67	0	[-1.3194985]
775	70	0	-2.06054	776	66.1333	0	-4.68664	775	35.5667	1	-0.874711	775	73	0	[-1.3159697]
776	4.13333	0	-2.05082	777	81.4	0	-4.68296	776	11.4333	0	-0.87309	776	51	0	[-1.3110449]
777	47.9	0	-2.04789	778	68.7	0	-4.68094	777	92.8333	0	-0.870612	777	36	1	[-1.3098093]
778	22.1333	0	-2.04594	779	70.9333	0	-4.67626	778	36.3	0	-0.866051	778	50	0	[-1.3092525]
779	46.7	1	-2.0459	780	3.33333	0	-4.67229	779	79.6333	1	-0.86593	779	31	0	[-1.3091455]
780	67.6333	0	-2.04568	781	112.233	0	-4.65418	780	13.2	0	-0.863025	780	10	0	[-1.308814]
781	107.633	0	-2.04311	782	11.4333	0	-4.65105	781	33.9333	0	-0.861701	781	17	0	[-1.3079851]
782	139.433	0	-2.04251	783	6.83333	0	-4.64573	782	120.633	0	-0.859619	782	65	0	[-1.307884]
783	11.9333	0	-2.03718	784	12.3	0	-4.64013	783	51.5667	0	-0.856893	783	99	0	[-1.3052759]
784	3.03333	0	-2.03645	785	83.9667	0	-4.6385	784	88.9	1	-0.851148	784	65	0	[-1.3049153]
785	51.5333	0	-2.029	786	13.5	0	-4.63808	785	72.2	0	-0.845388	785	63	0	[-1.3018724]
786	34.0333	0	-2.02338	787	60.2333	0	-4.63419	786	96.7	0	-0.844622	786	64	0	[-1.2960864]
787	138.033	0	-2.02156	788	26.2	0	-4.63352	787	3.16667	0	-0.842548	787	64	0	[-1.2949073]
788	109.167	0	-2.0208	789	104.233	0	-4.63146	788	124.333	0	-0.840294	788	29	1	[-1.294107]
789	8.16667	0	-2.01902	790	129.533	1	-4.62967	789	3.73333	0	-0.835962	789	41	0	[-1.293144]
790	32.0333	0	-2.01724	791	30.5333	0	-4.62813	790	105.767	1	-0.824697	790	23	1	[-1.2929864]
791	36.1	0	-2.01387	792	20.5667	1	-4.62596	791	36.6333	0	-0.823243	791	62	0	[-1.2929014]
792	143.667	0	-2.01065	793	109.9	0	-4.62385	792	1.7	0	-0.822383	792	39	0	[-1.2925596]
793	115.467	0	-2.00995	794	62.0667	0	-4.62146	793	50.3	0	-0.81118	793	58	0	[-1.2858837]
794	97.7333	0	-2.00906	795	60.6	0	-4.61658	794	99.8667	0	-0.810778	794	90	0	[-1.2841196]
795	155.533	0	-2.00708	796	50.5667	0	-4.61546	795	53.2667	1	-0.810776	795	62	0	[-1.283927]
796	58.2	0	-2.00678	797	168.767	0	-4.6144	796	94.3	0	-0.805745	796	75	0	[-1.2804427]
797	125.167	0	-2.00383	798	37.8667	1	-4.61093	797	48.4	0	-0.805449	797	78	0	[-1.2778046]
798	87.3667	0	-2.00364	799	19	0	-4.60727	798	86.9667	0	-0.804313	798	66	0	[-1.2763343]
799	35.2667	0	-1.99962	800	61.1	0	-4.60531	799	59.9667	0	-0.796601	799	32	0	[-1.2759726]
800	119.4	0	-1.9979	801	97.1667	0	-4.60458	800	122.333	0	-0.795113	800	0	0	[-1.2727926]
801	29.2667	0	-1.99537	802	159.133	0	-4.60223	801	33.5667	0	-0.791762	801	33	0	[-1.2726598]
802	71.7667	0	-1.99256	803	76.8	0	-4.59898	802	24.1667	1	-0.788827	802	21	1	[-1.2663586]
803	35.5	0	-1.981	804	2.53333	0	-4.59829	803	128.533	0	-0.788691	803	53	0	[-1.2622318]
804	179.867	0	-1.9749	805	132.1	0	-4.5937	804	73.3	0	-0.784139	804	6	1	[-1.2583504]
805	111.033	0	-1.97476	806	148.567	0	-4.58962	805	2	0	-0.776643	805	24	0	[-1.2564709]
806	120.967	0	-1.97377	807	72.5667	0	-4.58892	806	95.3333	0	-0.776367	806	50	0	[-1.254518]
807	22.1	1	-1.97173	808	77.4333	0	-4.58485	807	86.8	0	-0.776101	807	41	0	[-1.2506342]
808	3.3	0	-1.96896	809	53.2667	1	-4.58432	808	139.567	0	-0.774174	808	69	0	[-1.2467089]
809	89.3667	0	-1.9681	810	33.3333	0	-4.5764	809	126.4	0	-0.773336	809	51	0	[-1.2370105]
810	61.0667	0	-1.96284	811	90.1667	0	-4.57479	810	71.5667	0	-0.772632	810	34	1	[-1.2349436]
811	81.0667	0	-1.95778	812	141.833	0	-4.56825	811	71.8333	0	-0.761593	811	22	0	[-1.2320619]
812	127.6	0	-1.95486	813	168.667	0	-4.56746	812	53.2	0	-0.757608	812	34	0	[-1.2301762]
813	81.4	0	-1.95404	814	127.6	0	-4.56742	813	97.8667	0	-0.750235	813	107	0	[-1.2296276]
814	36.7	0	-1.95086	815	4.83333	0	-4.55995	814	10	0	-0.746216	814	46	0	[-1.2275097]
815	13.2	0	-1.94731	816	30.3	0	-4.55569	815	3.8	0	-0.735993	815	19	0	[-1.2255474]
816	64.2333	0	-1.9466	817	37.9667	0	-4.55339	816	75.3667	0	-0.73368	816	52	0	[-1.2220763]
817	46.4333	0	-1.94265	818	3.73333	0	-4.55107	817	146.433	0	-0.730732	817	10	0	[-1.2215247]
818	13.8667	0	-1.94256	819	48.0667	1	-4.54252	818	39	0	-0.728659	818	61	0	[-1.2189028]
819	165.467	0	-1.9424	820	11.2	0	-4.54012	819	33.8333	0	-0.723468	819	28	0	[-1.21829]
820	25.6667	0	-1.93882	821	51.6	0	-4.53797	820	45.8333	1	-0.722456	820	23	0	[-1.2025025]
821	50.3	0	-1.93276	822	4.26667	0	-4.53458	821	96.1667	0	-0.703666	821	62	0	[-1.2022126]
822	44.8333	0	-1.93181	823	85.2333	0	-4.52704	822	3.26667	0	-0.69966	822	32	0	[-1.2004244]
823	3.83333	0	-1.92941	824	83.4	1	-4.52407	823	110.633	0	-0.689254	823	66	0	[-1.1993768]
824	102.167	0	-1.92854	825	65.6	0	-4.52239	824	3.1	0	-0.684774	824	35	1	[-1.199362]
825	7.36667	0	-1.92467	826	5.53333	0	-4.52108	825	108.433	0	-0.683614	825	32	0	[-1.1982815]
826	108.533	0	-1.91985	827	28.5667	0	-4.51787	826	1.63333	0	-0.682478	826	46	0	[-1.1966122]
827	68.3667	0	-1.9193	828	50.0667	0	-4.51543	827	92.6667	0	-0.67739	827	45	0	[-1.1936888]
828	85.4	0	-1.91911	829	116.9	0	-4.50841	828	78.4333	0	-0.675937	828	34	0	[-1.188341]
829	24.9	0	-1.91676	830	5.26667	0	-4.5075	829	70.4667	0	-0.673099	829	49	0	[-1.1784891]
830	55.9	0	-1.91621	831	31.0333	0	-4.49218	830	5.7	0	-0.670288	830	50	0	[-1.1755066]
831	3.46667	0	-1.91323	832	10.9667	0	-4.48582	831	71.5	0	-0.666518	831	45	0	[-1.1740935]
832	64.2333	0	-1.91281	833	3.8	0	-4.48347	832	3.96667	0	-0.665511	832	64	0	[-1.1714104]
833	20.1	0	-1.91099	834	73.3	0	-4.46636	833	121.133	0	-0.662142	833	47	0	[-1.1694173]
834	49.0667	0	-1.90817	835	36.4333	0	-4.45696	834	5.86667	0	-0.659366	834	71	0	[-1.1689743]
835	79.3333	0	-1.90599	836	17.8	0	-4.45579	835	60.8667	1	-0.648896	835	7	0	[-1.1622231]
836	11.1333	0	-1.90539	837	131.8	0	-4.4531	836	110.933	0	-0.64493	836	49	0	[-1.1604207]
837	35.7667	0	-1.90529	838	72.1	0	-4.45195	837	105.6	0	-0.642368	837	80	0	[-1.1486804]
838	3.3	0	-1.90321	839	15.2	0	-4.45163	838	85.8667	0	-0.639784	838	16	0	[-1.1468794]
839	43.4	0	-1.90276	840	146.467	0	-4.45129	839	5.23333	0	-0.638647	839	18	1	[-1.1435527]
840	118.5	0	-1.90228	841	47.4	0	-4.44614	840	100.5	0	-0.629304	840	69	0	[-1.1349857]
841	57.5667	0	-1.89385	842	82.0333	0	-4.44338	841	122.8	0	-0.627458	841	39	0	[-1.1296389]
842	47.3333	0	-1.88457	843	118.8	0	-4.43353	842	43.1667	0	-0.624338	842	68	0	[-1.1278425]
843	81.2333	0	-1.88408	844	3.33333	0	-4.4318	843	12.6333	0	-0.623117	843	38	0	[-1.1256418]
844	7.33333	0	-1.88334	845	4.7	0	-4.41755	844	67.6	0	-0.622796	844	17	0	[-1.1163712]
845	54.9667	1	-1.88114	846	63.5	0	-4.41546	845	4.33333	0	-0.622758	845	13	0	[-1.1162536]
846	115.933	0	-1.88019	847	65.1	0	-4.41091	846	126.7	0	-0.620881	846	54	0	[-1.1124394]
847	73.7333	0	-1.87768	848	5.83333	0	-4.40585	847	158.6	0	-0.615424	847	49	0	[-1.1103525]
848	30.0333	0	-1.87629	849	91.9	0	-4.40543	848	27	0	-0.614046	848	104	0	[-1.1096957]
849	90.1	0	-1.8725	850	85.6	0	-4.40525	849	25.1	1	-0.612027	849	1	0	[-1.1022718]
850	119.167	0	-1.8667	851	2.76667	0	-4.40214	850	22.8	1	-0.602636	850	51	0	[-1.0932151]
851	64.9333	0	-1.85935	852	2.53333	0	-4.3964	851	112.867	0	-0.601967	851	3	0	[-1.0910137]
852	27.9	1	-1.85379	853	2.93333	0	-4.38588	852	29.3333	0	-0.601167	852	35	0	[-1.0774145]
853	50.3	0	-1.8461	854	59.6667	0	-4.37182	853	59.3	0	-0.599253	853	66	0	[-1.0697714]
854	57.6333	0	-1.84577	855	36.6	1	-4.36669	854	121.5	0	-0.594408	854	50	0	[-1.0665501]
855	3.23333	0	-1.84346	856	59.6667	0	-4.34797	855	53.6667	0	-0.593652	855	19	0	[-1.0525091]
856	25.3	1	-1.83669	857	8.03333	0	-4.34755	856	1.6	0	-0.592607	856	48	0	[-1.0440309]
857	36.3	0	-1.83461	858	42.7	1	-4.34583	857	95.8333	0	-0.586558	857	36	0	[-1.016129]
858	36.0333	0	-1.82689	859	43.2	0	-4.34084	858	10.5	0	-0.579297	858	17	0	[-1.0075753]
859	126.067	0	-1.82292	860	9.16667	0	-4.33393	859	68.8667	0	-0.578552	859	46	0	[-0.9986297]
860	79.4	0	-1.82176	861	117.267	0	-4.31784	860	29.1667	0	-0.575046	860	64	0	[-0.99557894]
861	56.4333	0	-1.8206	862	50.2667	1	-4.31407	861	179.3	0	-0.569495	861	14	1	[-0.9952949]
862	5.8	0	-1.8205	863	98.1	0	-4.31148	862	56.9333	0	-0.562871	862	29	0	[-0.99314797]
863	59.7667	0	-1.81452	864	106.067	0	-4.30201	863	33.3333	0	-0.559727	863	6	0	[-0.99067724]
864	151	0	-1.81233	865	118.033	0	-4.29683	864	48.8333	1	-0.546688	864	33	0	[-0.98372793]
865	141.4	0	-1.81161	866	73.3667	0	-4.29379	865	84.8	1	-0.524338	865	100	0	[-0.97693044]
866	114.4	0	-1.81159	867	142.8	0	-4.28705	866	60.0667	0	-0.523733	866	49	0	[-0.9705685]
867	33.7	0	-1.81099	868	114.833	0	-4.27705	867	99.0667	0	-0.520712	867	8	0	[-0.9638125]
868	53.5667	1	-1.81054	869	41.9	1	-4.27548	868	63.9667	0	-0.519115	868	36	0	[-0.95644206]
869	133.5	0	-1.80983	870	75.6333	0	-4.25828	869	109.1	0	-0.517413	869	61	0	[-0.9478913]
870	3.6	0	-1.80467	871	1.7	0	-4.25514	870	95.8333	0	-0.514787	870	61	0	[-0.9291515]
871	57.1	0	-1.8045	872	90.1667	0	-4.25413	871	3.76667	0	-0.508523	871	51	0	[-0.890673]
872	80.1333	1	-1.80405	873	55.3	0	-4.252	872	23.9333	1	-0.500614	872	2	0	[-0.88596046]
873	5.53333	0	-1.80356	874	178.8	0	-4.22844	873	96.0333	0	-0.491254	873	66	0	[-0.8666431]
874	99.7	0	-1.80306	875	13.1667	0	-4.21571	874	179.833	0	-0.488837	874	19	1	[-0.83033377]
875	69.7333	0	-1.80085	876	91.2333	0	-4.2097	875	14.6667	0	-0.485889	875	1	0	[-0.8227153]
876	132.233	0	-1.79889	877	13.0667	0	-4.20457	876	20.6333	1	-0.485015	876	27	0	[-0.8214593]
877	32	0	-1.79696	878	10.1333	0	-4.19183	877	68.1	0	-0.482944	877	94	0	[-0.816051]
878	130.267	0	-1.79664	879	155	0	-4.18862	878	3.03333	0	-0.476734	878	81	0	[-0.8006454]
879	130.267	0	-1.79119	880	73.0333	0	-4.18782	879	10.0333	0	-0.470325	879	49	0	[-0.7927363]
880	35.4333	0	-1.78744	881	3.36667	0	-4.17956	880	4.93333	0	-0.469704	880	7	0	[-0.78808224]
881	14.5	0	-1.78149	882	3.26667	0	-4.17825	881	70.4667	0	-0.462718	881	81	0	[-0.76697636]
882	3.5	0	-1.77636	883	31.7667	0	-4.1766	882	117.433	0	-0.458257	882	84	0	[-0.74959004]
883	91.2667	0	-1.7746	884	4.5	0	-4.16264	883	107.533	0	-0.45078	883	59	0	[-0.7466669]
884	148.667	0	-1.77286	885	3.4	0	-4.15023	884	127.367	0	-0.442174	884	3	0	[-0.73045385]
885	68.4	0	-1.7713	886	32.4333	0	-4.14698	885	14.0333	0	-0.439364	885	43	1	[-0.72395384]
886	151.133	0	-1.76453	887	25.7	0	-4.13191	886	88.8333	0	-0.433616	886	7	0	[-0.7173705]
887	33.5333	0	-1.75947	888	81.2	0	-4.13072	887	13.9333	1	-0.432796	887	17	1	[-0.70421225]
888	5.6	0	-1.75526	889	38.6667	0	-4.11882	888	93	1	-0.424224	888	54	0	[-0.69366634]
889	65.0333	0	-1.75493	890	3.83333	0	-4.1173	889	5.3	0	-0.419976	889	13	0	[-0.6182151]
890	85.1	0	-1.75432	891	59.4667	0	-4.11537	890	61.8333	1	-0.41344	890	42	0	[-0.3355162]
891	11.8667	0	-1.75284	892	95.6333	0	-4.10669	891	59.6667	0	-0.411999	891	35	0	[-0.31026942]
892	34.7333	0	-1.74288	893	58.2	0	-4.10405	892	13.2667	0	-0.408406
893	72.1	0	-1.74216	894	80.0333	0	-4.10173	893	119.633	0	-0.386754
894	36.0333	0	-1.73905	895	49.8667	1	-4.09725	894	24.2333	0	-0.386015
895	35.0333	1	-1.73707	896	60.2667	0	-4.09382	895	100.367	0	-0.383123
896	44.0667	0	-1.73533	897	136.867	0	-4.09312	896	122.3	0	-0.375248
897	61.6333	1	-1.72962	898	101.167	0	-4.07274	897	151.2	0	-0.368273
898	58.8333	0	-1.72861	899	159.133	0	-4.06123	898	155.667	0	-0.36213
899	121.533	0	-1.72786	900	9.73333	0	-4.0567	899	55.5667	0	-0.35999
900	36.3	0	-1.72461	901	147.2	0	-4.05543	900	67.2333	0	-0.351247
901	3.23333	0	-1.72367	902	109.433	0	-4.05047	901	4.03333	0	-0.349291
902	60.3667	0	-1.72111	903	29.6	0	-4.04489	902	54.9	1	-0.344032
903	117.8	0	-1.72086	904	2.93333	0	-4.04462	903	174.933	0	-0.331972
904	31.0667	0	-1.71683	905	49.9	0	-4.04171	904	70.6667	0	-0.325474
905	129.633	0	-1.71157	906	84.5	0	-4.02972	905	10.0667	0	-0.323016
906	45.7	0	-1.71027	907	112.867	0	-3.99192	906	94.9	0	-0.313424
907	134.167	0	-1.70894	908	16.9333	1	-3.98868	907	22.9333	1	-0.312559
908	86.4333	0	-1.70276	909	116.367	0	-3.98767	908	3.73333	0	-0.310557
909	28.4667	0	-1.69875	910	19.9667	0	-3.95862	909	75.7333	0	-0.310387
910	5.23333	0	-1.69782	911	29.5667	0	-3.95348	910	3.1	0	-0.308747
911	48.1333	0	-1.69509	912	92.1667	0	-3.94108	911	66.4667	0	-0.297011
912	132.1	0	-1.69168	913	35.8	1	-3.93654	912	60.5	0	-0.290697
913	48.6333	0	-1.68764	914	73.3333	0	-3.93259	913	114.5	0	-0.281816
914	3.43333	0	-1.68235	915	127.667	0	-3.93044	914	107.567	0	-0.265664
915	109.133	0	-1.67328	916	2.96667	0	-3.92906	915	56.7333	1	-0.246153
916	95.9667	0	-1.67051	917	37.9667	1	-3.91433	916	71.5333	1	-0.243066
917	35.6667	0	-1.66617	918	13.2	0	-3.91253	917	49.9667	0	-0.233866
918	120.567	0	-1.65633	919	35.3667	0	-3.9098	918	26.5667	1	-0.232875
919	77.6333	0	-1.65519	920	104.7	0	-3.9077	919	41.5333	1	-0.229907
920	63.9333	0	-1.64882	921	96.6	0	-3.90602	920	36.1333	0	-0.223494
921	9.9	0	-1.63981	922	100.567	0	-3.90601	921	16.3	0	-0.222572
922	57.7333	0	-1.63931	923	3.03333	0	-3.90178	922	128.933	0	-0.217818
923	28.1333	1	-1.63772	924	3.9	0	-3.89065	923	17.5	1	-0.204347
924	33.7667	0	-1.63676	925	35.2	0	-3.88368	924	14.2	0	-0.19923
925	32.0667	0	-1.63454	926	3.33333	0	-3.88333	925	29.5667	0	-0.194481
926	27.7667	0	-1.6159	927	96.6	0	-3.8675	926	70.9	0	-0.190014
927	95.1	0	-1.61513	928	102.8	0	-3.86636	927	43.8667	1	-0.18833
928	10.4	0	-1.61191	929	113.7	0	-3.85645	928	1.5	0	-0.184196
929	28.7667	1	-1.60837	930	89.3667	1	-3.85559	929	60.7	1	-0.183882
930	125.7	0	-1.60762	931	54.8	0	-3.84384	930	155.933	0	-0.171988
931	155.967	0	-1.60152	932	29.8667	0	-3.83999	931	102.433	0	-0.163307
932	95.3333	0	-1.60048	933	116.433	1	-3.83802	932	1.86667	0	-0.145708
933	143.833	0	-1.60041	934	104.733	0	-3.83607	933	51.4	0	-0.138508
934	34	0	-1.59484	935	4.13333	0	-3.81656	934	62.1	1	-0.135893
935	37.1333	0	-1.59438	936	2.83333	0	-3.7609	935	166.3	0	-0.11067
936	37.7333	0	-1.59202	937	110.733	1	-3.75496	936	36.6	1	-0.10205
937	81.9333	0	-1.58898	938	123.2	0	-3.73518	937	100.633	0	-0.101113
938	0.933333	0	-1.58587	939	47.3667	1	-3.73375	938	75.9667	1	-0.0844043
939	66.2333	0	-1.57948	940	36.1	0	-3.72766	939	3.36667	0	-0.0564736
940	78.5	0	-1.57655	941	62.3	0	-3.70263	940	100.533	0	-0.0545227
941	92.6333	0	-1.57407	942	74.7	0	-3.68646	941	3.76667	0	-0.0541594
942	65.6667	1	-1.57357	943	3.46667	0	-3.68355	942	102.8	0	-0.0538091
943	114.467	0	-1.56975	944	49.9333	0	-3.68003	943	49.3	0	-0.0509478
944	107.033	0	-1.56877	945	77.9333	0	-3.6681	944	102.8	0	-0.0449289
945	112.567	0	-1.56423	946	3.03333	0	-3.64339	945	56.5667	0	-0.0426898
946	70.8667	0	-1.56141	947	144.633	0	-3.63827	946	130.033	0	-0.031306
947	116.9	0	-1.55931	948	55.2	0	-3.62297	947	2.6	0	-0.0179952
948	113.467	0	-1.55717	949	128.233	0	-3.62274	948	3.96667	0	-0.0110209
949	94.5333	0	-1.55328	950	91	0	-3.60437	949	49.9	0	-0.00193306
950	93.2667	0	-1.54167	951	40.4333	0	-3.58317	950	45.5	1	0.0127377
951	3.06667	0	-1.54131	952	73.1	0	-3.57721	951	5.7	0	0.019537
952	68.8333	0	-1.53733	953	12.9667	1	-3.56992	952	2.93333	0	0.0298003
953	82.6333	0	-1.53721	954	2.9	0	-3.53909	953	76.2	0	0.0372737
954	48.7333	1	-1.53535	955	55.3333	0	-3.5122	954	2.8	0	0.0493322
955	36.5	1	-1.53007	956	3	0	-3.47502	955	125.9	0	0.0778608
956	72.6	0	-1.52972	957	3.23333	0	-3.43047	956	108.4	0	0.0789309
957	72.7667	0	-1.52452	958	25.2	1	-3.4051	957	92.8333	0	0.110761
958	84.6333	0	-1.52373	959	84.2	0	-3.39851	958	123.3	0	0.11674
959	72.0333	0	-1.52208	960	33.7	1	-3.35701	959	59.4667	0	0.137435
960	32.1	0	-1.52207	961	68.3333	0	-3.33317	960	86.3	0	0.146366
961	150.1	1	-1.52172	962	95.8667	1	-3.32199	961	65.8667	1	0.154604
962	156.833	0	-1.52036	963	107.067	0	-3.31775	962	117.967	0	0.157085
963	88.2333	0	-1.51425	964	16.9	1	-3.31592	963	2.66667	0	0.164439
964	165.9	0	-1.50205	965	68.3333	0	-3.27027	964	97.2667	0	0.214795
965	3.2	0	-1.50117	966	35.7	1	-3.20454	965	60.1667	1	0.217323
966	81.3667	0	-1.4971	967	133.267	0	-3.15199	966	11.0667	0	0.234226
967	158.7	0	-1.49175	968	81.9333	1	-3.10303	967	58.1667	0	0.290401
968	157.1	1	-1.49027	969	136	0	-3.09631	968	24.5	1	0.316004
969	47.8333	0	-1.48218	970	54.2667	0	-3.03641	969	24.3333	1	0.332502
970	42.1333	0	-1.47565	971	24.6667	1	-3.03097	970	4.53333	0	0.370956
971	64.8	0	-1.4744	972	57.3	0	-2.99804	971	101.333	1	0.385676
972	160.5	0	-1.47377	973	15.6333	1	-2.94108	972	87.5333	0	0.425065
973	3.36667	0	-1.46135	974	97.3333	0	-2.89513	973	13.6333	1	0.460535
974	72.5333	0	-1.46074	975	15.5667	1	-2.8463	974	106.867	0	0.466119
975	2.93333	0	-1.45701	B000025105	73.7	0	-2.82443	975	146.8	0	0.490516
976	118.767	0	-1.45639	B000015217	14.0333	1	-2.82374	976	21.7	1	0.523283
977	16.4	1	-1.45595	B000013691	32	1	-2.78025	977	66.7667	1	0.59166
978	97.2333	0	-1.44968	B000009049	15.3667	1	-2.70166	978	16.7	1	0.597421
979	115.467	0	-1.43906	B000011023	111.6	1	-2.64317	979	40.6333	1	0.695648
980	88.8667	0	-1.43598
981	155.367	0	-1.43481
982	10.1	0	-1.42874
983	81.2333	1	-1.40987
984	15.7333	0	-1.40574
985	126.5	0	-1.40511
986	77.1333	0	-1.40261
987	34.7	0	-1.40127
988	48.3333	0	-1.39562
989	91.0667	0	-1.39134
990	172.867	0	-1.39106
991	34.7	0	-1.3908
992	130.7	0	-1.38682
993	3.96667	0	-1.3819
994	36.3333	0	-1.37958
995	8.9	0	-1.3736
996	27.9667	0	-1.37055
997	18.9	0	-1.3674
998	59.9667	0	-1.36545
999	11.9667	0	-1.36477
1000	3.5	0	-1.35988
1001	4.4	0	-1.3587
1002	72.2667	0	-1.35654
1003	62.2333	0	-1.35374
1004	3.7	0	-1.35365
1005	91.8333	0	-1.35036
1006	98.8	0	-1.34629
1007	109.267	0	-1.34356
1008	91.5667	0	-1.3399
1009	48.0667	1	-1.33669
1010	68.8667	0	-1.33219
1011	5.63333	0	-1.33044
1012	27.5333	0	-1.33042
1013	89.3667	0	-1.32574
1014	97.6333	0	-1.30437
1015	5.6	0	-1.30226
1016	103.433	0	-1.30146
1017	107.467	0	-1.30146
1018	60.5	0	-1.30115
1019	122.3	0	-1.30061
1020	52.6	0	-1.29229
1021	15.7333	0	-1.29
1022	29.2667	1	-1.28092
1023	111.7	0	-1.27641
1024	5.9	0	-1.27376
1025	4.33333	0	-1.27131
1026	107.467	0	-1.2689
1027	108.6	0	-1.26572
1028	25.8333	0	-1.26162
1029	67.1667	0	-1.25894
1030	61.4	0	-1.25868
1031	87.4	0	-1.25669
1032	11.7	0	-1.25455
1033	5.33333	0	-1.24819
1034	39.2333	0	-1.24083
1035	36.0667	0	-1.24016
1036	146.8	0	-1.23932
1037	6.8	0	-1.23766
1038	29.9333	0	-1.23711
1039	96.4	0	-1.23372
1040	4.6	0	-1.23118
1041	3.36667	0	-1.22858
1042	145.967	0	-1.22783
1043	91.8	0	-1.22273
1044	35.6	0	-1.20317
1045	35.4	1	-1.18757
1046	3.1	0	-1.18256
1047	15.7667	1	-1.17982
1048	36.3333	0	-1.1769
1049	37.0333	0	-1.17053
1050	61.7333	0	-1.16798
1051	110.933	0	-1.15513
1052	129.967	0	-1.15496
1053	93.6333	0	-1.14968
1054	70.0667	0	-1.14211
1055	95	0	-1.13997
1056	125.167	0	-1.13772
1057	64.7667	0	-1.12924
1058	85.5667	0	-1.12836
1059	10.3667	0	-1.12676
1060	53.2	0	-1.1257
1061	166.3	0	-1.12352
1062	121.2	0	-1.11821
1063	3.43333	0	-1.11561
1064	38.7	1	-1.11456
1065	3.16667	0	-1.11123
1066	20.2667	1	-1.10374
1067	34.1333	1	-1.10293
1068	91.1667	0	-1.10208
1069	5.6	0	-1.1014
1070	61.0667	0	-1.09867
1071	87.0667	0	-1.07228
1072	3	0	-1.07181
1073	11.6667	1	-1.06955
1074	79.1	0	-1.06798
1075	116.833	0	-1.06414
1076	65.2	0	-1.05794
1077	4	0	-1.0576
1078	72.6	1	-1.05698
1079	4.7	0	-1.05553
1080	15.2	0	-1.05224
1081	12.2667	0	-1.05062
1082	88.2333	0	-1.04036
1083	65.2	0	-1.03986
1084	131.233	0	-1.03873
1085	72	0	-1.03798
1086	84.5	0	-1.03606
1087	107.367	0	-1.02719
1088	61.2667	0	-1.01904
1089	17.8	0	-1.01893
1090	29.5333	0	-1.0183
1091	3.5	0	-1.01666
1092	82.3333	0	-1.01599
1093	26.8333	1	-1.01473
1094	36.2333	0	-1.01045
1095	53.4	0	-1.01041
1096	95.8667	1	-1.00719
1097	33.8667	0	-1.00533
1098	93.2667	0	-1.00487
1099	22.6333	0	-0.99758
1100	67.3	0	-0.99009
1101	83.0667	0	-0.98316
1102	124.333	0	-0.981835
1103	7.26667	0	-0.97147
1104	5	0	-0.96572
1105	85.6333	0	-0.958979
1106	96.3667	0	-0.958178
1107	27.6667	1	-0.957813
1108	108.1	0	-0.954332
1109	122.8	0	-0.952503
1110	92.4	0	-0.950652
1111	5.3	0	-0.949933
1112	4.63333	0	-0.947678
1113	7.5	0	-0.944562
1114	169.4	0	-0.942203
1115	81.6667	0	-0.941327
1116	68.4333	1	-0.940748
1117	28.8	1	-0.939949
1118	70	0	-0.939493
1119	74.3333	0	-0.938763
1120	27.1333	0	-0.936523
1121	101.167	0	-0.925168
1122	81.9667	0	-0.923298
1123	54.7	0	-0.920148
1124	119.133	0	-0.914248
1125	143	0	-0.909681
1126	89.3333	0	-0.901138
1127	1.8	0	-0.899295
1128	2.6	0	-0.892359
1129	95.8333	0	-0.882575
1130	53	0	-0.881648
1131	5.36667	0	-0.878259
1132	48.4	0	-0.870636
1133	102.8	0	-0.861912
1134	91.1667	0	-0.859776
1135	36.8333	0	-0.858838
1136	116.4	0	-0.852559
1137	4.16667	0	-0.852027
1138	113.667	0	-0.846317
1139	88.2333	0	-0.834077
1140	91.7	0	-0.832005
1141	19.3	0	-0.828025
1142	77.8333	0	-0.826315
1143	81.6	0	-0.822552
1144	86.6333	0	-0.818275
1145	114.733	0	-0.812343
1146	65.4	0	-0.809823
1147	14.9333	0	-0.808405
1148	78.4333	0	-0.806151
1149	122.433	0	-0.804923
1150	37.5	0	-0.803548
1151	130.8	0	-0.791196
1152	86.4	0	-0.790016
1153	43.6667	0	-0.78445
1154	39.7	1	-0.78082
1155	5.23333	0	-0.780639
1156	12.3333	0	-0.779528
1157	102.2	1	-0.774075
1158	126.7	0	-0.773927
1159	1.63333	0	-0.771243
1160	101.2	0	-0.76316
1161	60.7	0	-0.758435
1162	70.8	0	-0.74798
1163	55.0333	0	-0.746566
1164	77.4667	0	-0.745328
1165	114	0	-0.745172
1166	156.9	0	-0.743124
1167	145.367	0	-0.739814
1168	72.3333	0	-0.730468
1169	69.6333	1	-0.708899
1170	3.76667	0	-0.700496
1171	4.13333	0	-0.686181
1172	74.0667	0	-0.684375
1173	76.3333	0	-0.683165
1174	4.3	0	-0.67053
1175	3.16667	0	-0.669401
1176	60.0667	0	-0.662421
1177	30.8	0	-0.661146
1178	36.7	0	-0.652135
1179	103.233	0	-0.646267
1180	94.6667	0	-0.645537
1181	69.7667	1	-0.640937
1182	86	0	-0.637111
1183	67.3	0	-0.615112
1184	97.7333	0	-0.615004
1185	12.6667	0	-0.613078
1186	158.2	0	-0.606102
1187	40.2	0	-0.598927
1188	20.5667	1	-0.59801
1189	28.6333	0	-0.597338
1190	73.1	0	-0.593693
1191	148.1	0	-0.593258
1192	56.6667	1	-0.578054
1193	5.8	0	-0.573248
1194	74.2333	0	-0.568987
1195	15.3333	0	-0.564991
1196	68.6667	0	-0.556771
1197	61.4667	0	-0.543391
1198	57.4333	0	-0.538041
1199	36.0667	1	-0.537454
1200	98.6333	0	-0.524679
1201	5.63333	0	-0.519221
1202	4.43333	0	-0.517097
1203	83.8333	0	-0.51159
1204	3.63333	0	-0.504098
1205	55.6	1	-0.500413
1206	60.6667	0	-0.494911
1207	36.4	0	-0.49368
1208	59.1333	0	-0.480926
1209	25.8	1	-0.478217
1210	60.5	0	-0.475771
1211	28.6667	1	-0.453472
1212	3.13333	0	-0.450711
1213	27.1333	1	-0.449022
1214	59.4667	0	-0.447676
1215	157.867	0	-0.44671
1216	82.9333	0	-0.443667
1217	106.767	0	-0.439603
1218	36.7667	0	-0.436778
1219	73.9	0	-0.436029
1220	19.7333	1	-0.433979
1221	96.8	0	-0.410816
1222	5.93333	0	-0.410072
1223	18.4333	1	-0.409343
1224	50.1667	1	-0.403182
1225	54	1	-0.386897
1226	11.2333	0	-0.379654
1227	61.1667	0	-0.374722
1228	123.7	0	-0.373896
1229	71.7333	0	-0.373516
1230	121.267	0	-0.351411
1231	100.8	0	-0.338216
1232	76.8	0	-0.319759
1233	9.63333	0	-0.318646
1234	5.43333	0	-0.315356
1235	16.2667	0	-0.311764
1236	104.567	0	-0.303531
1237	104.3	0	-0.303099
1238	97.6	0	-0.296244
1239	16.8333	1	-0.294451
1240	74.8667	0	-0.291082
1241	3.2	0	-0.287066
1242	91.6333	0	-0.264776
1243	20.9333	0	-0.262525
1244	42.2667	1	-0.262299
1245	37.1	0	-0.261915
1246	181.733	0	-0.253982
1247	23.2	1	-0.250797
1248	3.5	0	-0.225075
1249	42.7333	1	-0.220536
1250	44.2	1	-0.209087
1251	3.23333	0	-0.162393
1252	106.4	0	-0.150039
1253	24.6	1	-0.146742
1254	118.067	0	-0.132506
1255	88.1	0	-0.113728
1256	13.8667	1	-0.104943
1257	161.267	0	-0.0978783
1258	12.3	0	-0.0818981
1259	171.967	0	-0.075358
1260	33.1333	1	-0.0352983
1261	53.1667	0	-0.0319723
1262	91.3667	0	-0.0239461
1263	36.3333	0	-0.00367997
1264	59.3667	0	-0.00218149
1265	171.967	0	0.0173411
1266	126.633	0	0.0213897
1267	122.633	0	0.0252901
1268	57.7	1	0.040013
1269	102.633	0	0.0843628
1270	71.9667	0	0.087291
1271	35.3	1	0.0956505
1272	65.4333	0	0.107025
1273	118.4	0	0.122014
1274	36.5667	0	0.1382
1275	12.2333	1	0.161276
1276	94.5667	1	0.208295
1277	103.1	0	0.236497
1278	121	0	0.276313
1279	91.0667	1	0.293328
1280	110.767	0	0.300316
1281	71.7333	0	0.332877
1282	119.9	0	0.334509
1283	65.5667	0	0.339268
1284	42.0333	1	0.339539
1285	6.2	0	0.37352
1286	94.8667	1	0.405707
1287	54.4	0	0.414199
1288	71.7667	0	0.439315
1289	0.9	0	0.439816
1290	85.3667	0	0.457525
1291	146.8	0	0.476443
1292	2.9	0	0.507629
1293	53.1	1	0.510114
1294	24.4667	1	0.513059
1295	20.6667	1	0.517928
1296	2.96667	0	0.53027
1297	35.9	1	0.553407
1298	81.3667	0	0.609183
1299	20.2667	1	0.612457
1300	32.5667	1	0.693599
1301	24.5667	1	0.743629
1302	6.1	1	0.760603
1303	128.367	0	0.853473
1304	26.6333	1	0.869918
1305	53.7667	1	1.01929

## Sheet: fig.3
Fig.3(a)				Fig.3(b)				Fig.3(c)				Fig.3(d)				Fig.3(e)				Fig.3(g)				Fig.3(f)				Fig.3(h)				Fig.3(i)				Fig.3(j)				Fig.3(k)
ID	duration	event	group	ID	duration	event	group	ID	duration	event	group	ID	duration	event	group	ID	duration	event	group	ID	duration	event	group	ID	duration	event	group	ID	duration	event	group	ID	duration	event	group	ID	duration	event	group	ID	duration	event	group
0	69.93333333333334	0	Group 1	1	69.9333	0	Group 1	1	3.533333333333333	0	Group 1	0	67.8	0	Group 1	0	84.9333	0	Group 1	0	35.5	0	Group 1	0	34.6	0	Group 1	0	26.8333	0	Group 1	0	4.23333	0	Group 1	0	34.6	0	Group 1	0	73.7	0	Group 1
1	102.03333333333333	0	Group 1	2	102.033	0	Group 1	2	107.96666666666667	0	Group 1	1	78.7	0	Group 1	1	42.5333	0	Group 1	1	96.3667	0	Group 1	1	116.06666666666666	0	Group 1	1	86.4	0	Group 1	1	144.8	0	Group 1	1	116.06666666666666	0	Group 1	1	29.866666666666667	0	Group 1
2	59.1	0	Group 1	3	59.1	0	Group 1	3	7.966666666666667	0	Group 1	2	30.7	0	Group 1	2	48.7667	0	Group 1	2	54.7333	0	Group 1	2	62.53333333333333	0	Group 1	2	105.267	0	Group 1	2	49.0333	0	Group 1	2	62.53333333333333	0	Group 1	2	6.033333333333333	0	Group 1
3	24	0	Group 1	4	24	0	Group 1	4	20.566666666666666	0	Group 1	3	59	0	Group 1	3	26.2	0	Group 1	3	57.8333	0	Group 1	3	25.9	0	Group 1	3	95.1	0	Group 1	3	35	0	Group 1	3	25.9	0	Group 1	3	128.96666666666667	0	Group 1
4	85.83333333333333	0	Group 1	5	85.8333	0	Group 1	5	50.2	0	Group 1	4	37.1	0	Group 1	4	88.3667	0	Group 1	4	35.2333	0	Group 1	4	52.4	0	Group 1	4	48.0667	0	Group 1	4	46.3667	0	Group 1	4	52.4	0	Group 1	4	47.36666666666667	0	Group 1
5	4.466666666666667	0	Group 1	6	4.46667	0	Group 1	6	3.466666666666667	0	Group 1	5	31.3667	0	Group 1	5	37.2333	0	Group 1	5	74.2333	0	Group 1	5	48.8	0	Group 1	5	55.6	0	Group 1	5	3.8	0	Group 1	5	48.8	0	Group 1	5	96.8	0	Group 1
6	86.7	0	Group 1	7	86.7	0	Group 1	7	107.33333333333333	0	Group 1	6	5.63333	0	Group 1	6	86.9667	0	Group 1	6	1.13333	0	Group 1	6	59.1	0	Group 1	6	119.967	0	Group 1	6	87.2667	0	Group 1	6	59.1	0	Group 1	6	3.066666666666667	0	Group 1
7	62.53333333333333	0	Group 1	8	62.5333	0	Group 1	8	33.1	0	Group 1	7	30.5333	0	Group 1	7	15.5	0	Group 1	7	35.2667	0	Group 1	7	81.36666666666666	0	Group 1	7	59.2333	0	Group 1	7	56.4667	0	Group 1	7	81.36666666666666	0	Group 1	7	122.73333333333333	0	Group 1
8	116.06666666666666	0	Group 1	9	116.067	0	Group 1	9	55	0	Group 1	8	83.3333	0	Group 1	8	53.5333	0	Group 1	8	81.9	0	Group 1	8	81.2	0	Group 1	8	133.967	0	Group 1	8	61.9667	0	Group 1	8	81.2	0	Group 1	8	61.333333333333336	0	Group 1
9	29.2	0	Group 1	10	29.2	0	Group 1	10	34.733333333333334	0	Group 1	9	36.3667	0	Group 1	9	11.1333	0	Group 1	9	57.3	0	Group 1	9	85.83333333333333	0	Group 1	9	63.0333	0	Group 1	9	115.033	0	Group 1	9	85.83333333333333	0	Group 1	9	25.5	0	Group 1
10	0.3333333333333333	0	Group 1	11	0.333333	0	Group 1	11	60.13333333333333	0	Group 1	10	144.933	0	Group 1	10	32.9	0	Group 1	10	11	0	Group 1	10	25.833333333333332	0	Group 1	10	106.667	0	Group 1	10	98.7	0	Group 1	10	25.833333333333332	0	Group 1	10	31.666666666666668	0	Group 1
11	52.733333333333334	0	Group 1	12	52.7333	0	Group 1	12	35.53333333333333	0	Group 1	11	82.4667	0	Group 1	11	35.5667	0	Group 1	11	10.7333	0	Group 1	11	102.03333333333333	0	Group 1	11	48.2	0	Group 1	11	64.9	0	Group 1	11	102.03333333333333	0	Group 1	11	10.933333333333334	0	Group 1
12	25.9	0	Group 1	13	25.9	0	Group 1	13	25.533333333333335	0	Group 1	12	70.6	0	Group 1	12	72.1667	0	Group 1	12	85.0333	0	Group 1	12	30.633333333333333	0	Group 1	12	50.2	0	Group 1	12	48.7333	0	Group 1	12	30.633333333333333	0	Group 1	12	98.96666666666667	0	Group 1
13	35.733333333333334	0	Group 1	14	35.7333	0	Group 1	14	25.866666666666667	0	Group 1	13	35.4333	0	Group 1	13	120.533	0	Group 1	13	68.4	0	Group 1	13	24	0	Group 1	13	36.5667	0	Group 1	13	31.8333	0	Group 1	13	24	0	Group 1	13	9.6	0	Group 1
14	50.666666666666664	0	Group 1	15	50.6667	0	Group 1	15	96.16666666666667	0	Group 1	14	95.6	0	Group 1	14	56.4667	0	Group 1	14	82.3667	0	Group 1	14	35.46666666666667	0	Group 1	14	107.333	0	Group 1	14	6.06667	0	Group 1	14	35.46666666666667	0	Group 1	14	8.3	0	Group 1
15	34.6	0	Group 1	16	34.6	0	Group 1	16	117.93333333333334	0	Group 1	15	74.7	0	Group 1	15	81.4333	0	Group 1	15	86.6333	0	Group 1	15	4.466666666666667	0	Group 1	15	26.6667	0	Group 1	15	60.4667	0	Group 1	15	4.466666666666667	0	Group 1	15	28	0	Group 1
16	142.13333333333333	0	Group 1	17	142.133	0	Group 1	17	4.166666666666667	0	Group 1	16	4	0	Group 1	16	35.8333	0	Group 1	16	36.5667	0	Group 1	16	29.2	0	Group 1	16	36.9	0	Group 1	16	5.13333	0	Group 1	16	29.2	0	Group 1	16	8.6	0	Group 1
17	57.833333333333336	0	Group 1	18	57.8333	0	Group 1	18	37.6	0	Group 1	17	6.36667	0	Group 1	17	68.6667	0	Group 1	17	13.7	0	Group 1	17	51.9	0	Group 1	17	56.2667	0	Group 1	17	3.2	0	Group 1	17	51.9	0	Group 1	17	17.866666666666667	0	Group 1
18	52.4	0	Group 1	19	52.4	0	Group 1	19	69.83333333333333	0	Group 1	18	28.7	0	Group 1	18	5.63333	0	Group 1	18	73.7	0	Group 1	18	0.3333333333333333	0	Group 1	18	41.6	0	Group 1	18	35.4333	0	Group 1	18	0.3333333333333333	0	Group 1	18	29.266666666666666	0	Group 1
19	4.466666666666667	0	Group 1	20	4.46667	0	Group 1	20	117.5	0	Group 1	19	53.8667	0	Group 1	19	106.2	0	Group 1	19	70.2333	0	Group 1	19	33.6	0	Group 1	19	28.5	0	Group 1	19	11.5333	0	Group 1	19	33.6	0	Group 1	19	29.266666666666666	0	Group 1
20	110.46666666666667	0	Group 1	21	110.467	0	Group 1	21	94.1	0	Group 1	20	61.0333	0	Group 1	20	37.3333	0	Group 1	20	29.8667	0	Group 1	20	61.43333333333333	0	Group 1	20	2.56667	0	Group 1	20	4	0	Group 1	20	61.43333333333333	0	Group 1	20	56.13333333333333	0	Group 1
21	83.53333333333333	0	Group 1	22	83.5333	0	Group 1	22	49.4	0	Group 1	21	8.63333	0	Group 1	21	101.033	0	Group 1	21	69.7667	0	Group 1	21	3.7666666666666666	0	Group 1	21	37.0667	0	Group 1	21	53.5333	0	Group 1	21	3.7666666666666666	0	Group 1	21	86.13333333333334	0	Group 1
22	2.9	0	Group 1	23	2.9	0	Group 1	23	2.933333333333333	0	Group 1	22	145.633	0	Group 1	22	59.2667	0	Group 1	22	36.6	0	Group 1	22	23.533333333333335	0	Group 1	22	114.667	0	Group 1	22	5.36667	0	Group 1	22	23.533333333333335	0	Group 1	22	30.2	0	Group 1
23	61.43333333333333	0	Group 1	24	61.4333	0	Group 1	24	2.3	0	Group 1	23	37.4	0	Group 1	23	6.33333	0	Group 1	23	61.9	0	Group 1	23	52.733333333333334	0	Group 1	23	37.3333	0	Group 1	23	31.9333	0	Group 1	23	52.733333333333334	0	Group 1	23	28.166666666666668	0	Group 1
24	33.6	0	Group 1	25	33.6	0	Group 1	25	35	0	Group 1	24	71.4667	0	Group 1	24	35.5667	0	Group 1	24	15.1667	0	Group 1	24	2.9	0	Group 1	24	112.433	0	Group 1	24	47.6	0	Group 1	24	2.9	0	Group 1	24	57.266666666666666	0	Group 1
25	3.7666666666666666	0	Group 1	26	3.76667	0	Group 1	26	25.166666666666668	0	Group 1	25	38	0	Group 1	25	100.767	1	Group 1	25	11.1333	0	Group 1	25	1.5666666666666667	0	Group 1	25	27.4667	0	Group 1	25	3.33333	0	Group 1	25	1.5666666666666667	0	Group 1	25	37.166666666666664	0	Group 1
26	1.5666666666666667	0	Group 1	27	1.56667	0	Group 1	27	117.56666666666666	0	Group 1	26	107.867	0	Group 1	26	108.967	0	Group 1	26	53.4333	0	Group 1	26	75.3	0	Group 1	26	92.8	0	Group 1	26	33.5333	0	Group 1	26	75.3	0	Group 1	26	59.53333333333333	1	Group 1
27	1.1333333333333333	0	Group 1	28	1.13333	0	Group 1	28	89.03333333333333	0	Group 1	27	73.4667	0	Group 1	27	79.5333	0	Group 1	27	8.53333	0	Group 1	27	69.93333333333334	0	Group 1	27	0.3	0	Group 1	27	67.0333	0	Group 1	27	69.93333333333334	0	Group 1	27	116.66666666666667	0	Group 1
28	84.73333333333333	0	Group 1	29	84.7333	0	Group 1	29	65.56666666666666	0	Group 1	28	82.1333	0	Group 1	28	44.0667	0	Group 1	28	53.2333	0	Group 1	28	50.666666666666664	0	Group 1	28	60.1333	0	Group 1	28	58.4667	0	Group 1	28	50.666666666666664	0	Group 1	28	32.266666666666666	0	Group 1
29	50.63333333333333	0	Group 1	30	50.6333	0	Group 1	30	26.2	0	Group 1	29	24.8333	0	Group 1	29	10.7667	0	Group 1	29	100.867	0	Group 1	29	35.733333333333334	0	Group 1	29	2.53333	0	Group 1	29	12.1333	0	Group 1	29	35.733333333333334	0	Group 1	29	36.96666666666667	0	Group 1
30	80.6	0	Group 1	31	80.6	0	Group 1	31	62.233333333333334	0	Group 1	30	49.7	0	Group 1	30	57.5	0	Group 1	30	6.03333	0	Group 1	30	35.36666666666667	0	Group 1	30	64.6	0	Group 1	30	59.5333	0	Group 1	30	35.36666666666667	0	Group 1	30	6.766666666666667	0	Group 1
31	96.36666666666666	0	Group 1	32	96.3667	0	Group 1	32	58.46666666666667	0	Group 1	31	36.4667	0	Group 1	31	82.6	0	Group 1	31	14.9	0	Group 1	31	35.1	0	Group 1	31	3.53333	0	Group 1	31	58.3667	0	Group 1	31	35.1	0	Group 1	31	71.2	0	Group 1
32	83.1	0	Group 1	33	83.1	0	Group 1	33	81.06666666666666	0	Group 1	32	72.5	0	Group 1	32	59.9667	0	Group 1	32	33.8	0	Group 1	32	132.33333333333334	0	Group 1	32	50.8667	0	Group 1	32	3.46667	0	Group 1	32	132.33333333333334	0	Group 1	32	120.9	0	Group 1
33	2.2333333333333334	0	Group 1	34	2.23333	0	Group 1	34	105	0	Group 1	33	72.2667	0	Group 1	33	12.7667	0	Group 1	33	6.43333	0	Group 1	33	3.7333333333333334	0	Group 1	33	108.767	0	Group 1	33	61.0333	0	Group 1	33	3.7333333333333334	0	Group 1	33	46.9	0	Group 1
34	128.3	0	Group 1	35	128.3	0	Group 1	35	78.4	0	Group 1	34	27.7667	0	Group 1	34	111.033	0	Group 1	34	36.5667	0	Group 1	34	80.6	0	Group 1	34	61.0333	0	Group 1	34	44.8333	0	Group 1	34	80.6	0	Group 1	34	37.266666666666666	0	Group 2
35	35.233333333333334	0	Group 1	36	35.2333	0	Group 1	36	35.7	0	Group 1	35	42.6333	0	Group 1	35	33.8	0	Group 1	35	29.7333	0	Group 1	35	84.73333333333333	0	Group 1	35	1.66667	0	Group 1	35	98.2	0	Group 1	35	84.73333333333333	0	Group 1	35	98.83333333333333	0	Group 2
36	35.5	0	Group 1	37	35.5	0	Group 1	37	38	0	Group 1	36	8.96667	0	Group 1	36	34	0	Group 1	36	128.967	0	Group 1	36	31.633333333333333	0	Group 1	36	136.367	0	Group 1	36	45.0667	0	Group 1	36	31.633333333333333	0	Group 1	36	131.9	0	Group 2
37	35.1	0	Group 1	38	35.1	0	Group 1	38	56.13333333333333	0	Group 1	37	44.5	1	Group 1	37	45.0667	0	Group 1	37	12.1	0	Group 1	37	71.96666666666667	0	Group 1	37	111.733	0	Group 1	37	81.4333	0	Group 1	37	71.96666666666667	0	Group 1	37	108.46666666666667	0	Group 2
38	61.9	0	Group 1	39	61.9	0	Group 1	39	35.2	0	Group 1	38	72.5333	0	Group 1	38	39.3	0	Group 1	38	10	0	Group 1	38	142.13333333333333	0	Group 1	38	147.4	0	Group 1	38	37.4	0	Group 1	38	142.13333333333333	0	Group 1	38	93.4	0	Group 2
39	30.633333333333333	0	Group 1	40	30.6333	0	Group 1	40	79.76666666666667	0	Group 1	39	51.3667	0	Group 1	39	80.7	0	Group 1	39	36.6333	0	Group 1	39	181.33333333333334	0	Group 1	39	3.46667	0	Group 1	39	57.3333	0	Group 1	39	181.33333333333334	0	Group 1	39	52.93333333333333	0	Group 2
40	79.36666666666666	0	Group 1	41	79.3667	0	Group 1	41	75.83333333333333	0	Group 1	40	25.4667	0	Group 2	40	133.133	0	Group 1	40	47.3667	0	Group 1	40	133.13333333333333	0	Group 1	40	25.4	0	Group 1	40	45.9667	0	Group 1	40	133.13333333333333	0	Group 1	40	49.53333333333333	0	Group 2
41	27.333333333333332	0	Group 1	42	27.3333	0	Group 1	42	87.76666666666667	0	Group 1	41	7.96667	0	Group 2	41	58.8	0	Group 1	41	36.5333	0	Group 1	41	36.13333333333333	0	Group 1	41	35.7333	0	Group 1	41	69.9	0	Group 1	41	36.13333333333333	0	Group 1	41	67.2	0	Group 2
42	24.333333333333332	0	Group 1	43	24.3333	0	Group 1	43	70.53333333333333	0	Group 1	42	80.3333	0	Group 2	42	98.7	0	Group 1	42	25.0333	0	Group 1	42	5.466666666666667	0	Group 1	42	2.93333	0	Group 1	42	6.33333	0	Group 1	42	5.466666666666667	0	Group 1	42	116.13333333333334	0	Group 2
43	25.833333333333332	0	Group 1	44	25.8333	0	Group 1	44	34.43333333333333	0	Group 1	43	59.3	1	Group 2	43	39.2333	0	Group 1	43	29.8333	0	Group 1	43	61.9	0	Group 1	43	52.8	0	Group 1	43	17.1667	0	Group 1	43	61.9	0	Group 1	43	47.166666666666664	0	Group 2
44	35.46666666666667	0	Group 1	45	35.4667	0	Group 1	45	62.766666666666666	0	Group 1	44	139.3	0	Group 2	44	109.7	0	Group 1	44	38.1667	0	Group 1	44	130.23333333333332	0	Group 1	44	2.3	0	Group 1	44	106.2	0	Group 1	44	130.23333333333332	0	Group 1	44	88.2	0	Group 2
45	97.03333333333333	0	Group 1	46	97.0333	0	Group 1	46	25.2	0	Group 1	45	3.56667	0	Group 2	45	126.367	0	Group 1	45	65.5333	0	Group 1	45	3.2333333333333334	0	Group 1	45	98.9667	0	Group 1	45	91	0	Group 1	45	3.2333333333333334	0	Group 1	45	12.933333333333334	0	Group 2
46	3.7333333333333334	0	Group 1	47	3.73333	0	Group 1	47	98.2	0	Group 1	46	69.4333	0	Group 2	46	34.1333	0	Group 1	46	96.8	0	Group 1	46	39.266666666666666	0	Group 1	46	35.5	0	Group 1	46	69.2333	0	Group 1	46	39.266666666666666	0	Group 1	46	58.666666666666664	0	Group 2
47	27.7	0	Group 1	48	27.7	0	Group 1	48	36.666666666666664	0	Group 1	47	15.1667	0	Group 2	47	68.6	0	Group 1	47	57.8667	0	Group 1	47	61.86666666666667	0	Group 1	47	35.5333	0	Group 1	47	36.4333	0	Group 1	47	61.86666666666667	0	Group 1	47	96.33333333333333	0	Group 2
48	131.73333333333332	0	Group 1	49	131.733	0	Group 1	49	2.7	0	Group 1	48	31.4333	0	Group 2	48	11.8	0	Group 1	48	88.5333	0	Group 1	48	125.46666666666667	0	Group 1	48	25.7667	0	Group 1	48	11.1333	0	Group 1	48	125.46666666666667	0	Group 1	48	98.33333333333333	0	Group 2
49	65.26666666666667	0	Group 1	50	65.2667	0	Group 1	50	57.7	0	Group 1	49	103.667	0	Group 2	49	111.5	0	Group 1	49	3.06667	0	Group 1	49	3.7333333333333334	0	Group 1	49	26.2	0	Group 1	49	73.4667	0	Group 1	49	3.7333333333333334	0	Group 1	49	157.76666666666668	0	Group 2
50	61.3	0	Group 1	51	61.3	0	Group 1	51	98.76666666666667	0	Group 1	50	45.9333	0	Group 2	50	9.06667	0	Group 1	50	31.6333	0	Group 1	50	110.46666666666667	0	Group 1	50	50.3333	0	Group 1	50	108.7	0	Group 1	50	110.46666666666667	0	Group 1	50	59.43333333333333	0	Group 2
51	97.73333333333333	0	Group 1	52	97.7333	0	Group 1	52	2.8666666666666667	0	Group 1	51	116.367	0	Group 2	51	5.36667	0	Group 1	51	105.767	0	Group 1	51	4.466666666666667	0	Group 1	51	114.067	0	Group 1	51	5.4	0	Group 1	51	4.466666666666667	0	Group 1	51	74.36666666666666	0	Group 2
52	114.33333333333333	0	Group 1	53	114.333	0	Group 1	53	35.733333333333334	0	Group 1	52	86.2667	0	Group 2	52	137.833	0	Group 1	52	90.1667	0	Group 1	52	79.36666666666666	0	Group 1	52	38	0	Group 1	52	12.9	0	Group 1	52	79.36666666666666	0	Group 1	52	108.5	0	Group 2
53	61.8	0	Group 1	54	61.8	0	Group 1	54	49.03333333333333	0	Group 1	53	106.167	0	Group 2	53	12.4333	0	Group 1	53	122.733	0	Group 1	53	24.333333333333332	0	Group 1	53	35.7	0	Group 1	53	12.4333	0	Group 1	53	24.333333333333332	0	Group 1	53	1.5666666666666667	0	Group 2
54	3.5	0	Group 1	55	3.5	0	Group 1	55	105.43333333333334	0	Group 1	54	89.3	0	Group 2	54	55.4333	0	Group 2	54	6.73333	0	Group 1	54	36.06666666666667	0	Group 1	54	24.9333	0	Group 1	54	11.8	0	Group 1	54	36.06666666666667	0	Group 1	54	3.7666666666666666	0	Group 2
55	36.333333333333336	0	Group 1	56	36.3333	0	Group 1	56	75.6	0	Group 1	55	60.4	0	Group 2	55	30.5667	0	Group 2	55	90.6333	0	Group 1	55	36.833333333333336	0	Group 1	55	55	0	Group 1	55	24.8333	0	Group 1	55	36.833333333333336	0	Group 1	55	6.566666666666666	0	Group 2
56	36.6	0	Group 1	57	36.6	0	Group 1	57	98.96666666666667	0	Group 1	56	60.6	0	Group 2	56	10.7	0	Group 2	56	55.0667	0	Group 1	56	39.06666666666667	0	Group 1	56	35	0	Group 1	56	28.4333	0	Group 1	56	39.06666666666667	0	Group 1	56	151.33333333333334	0	Group 2
57	49.63333333333333	0	Group 1	58	49.6333	0	Group 1	58	37.03333333333333	0	Group 1	57	19	0	Group 2	57	105	0	Group 2	57	59.8	0	Group 1	57	93	0	Group 1	57	52.8	0	Group 1	57	59.3	0	Group 1	57	93	0	Group 1	57	12.8	0	Group 2
58	58.6	0	Group 1	59	58.6	0	Group 1	59	35.266666666666666	0	Group 1	58	40.3667	0	Group 2	58	6.3	0	Group 2	58	60.1667	0	Group 1	58	72.43333333333334	0	Group 1	58	65.5667	0	Group 1	58	156.867	0	Group 1	58	72.43333333333334	0	Group 1	58	35.833333333333336	0	Group 2
59	133.3	0	Group 1	60	133.3	0	Group 1	60	97.93333333333334	0	Group 1	59	10.2333	0	Group 2	59	46.3	0	Group 2	59	51.5667	0	Group 1	59	34.36666666666667	0	Group 1	59	78.7	0	Group 1	59	5.63333	0	Group 1	59	34.36666666666667	0	Group 1	59	10.433333333333334	0	Group 2
60	133.3	0	Group 1	61	133.3	0	Group 1	61	4.266666666666667	0	Group 1	60	48.0667	1	Group 2	60	97.0667	0	Group 2	60	61.3333	0	Group 1	60	50.13333333333333	0	Group 1	60	35.2333	0	Group 1	60	9.36667	0	Group 1	60	50.13333333333333	0	Group 1	60	47	0	Group 2
61	143.63333333333333	0	Group 1	62	143.633	0	Group 1	62	37.43333333333333	0	Group 1	61	36.8667	0	Group 2	61	2.1	0	Group 2	61	36.4	0	Group 1	61	4.233333333333333	0	Group 1	61	107.967	0	Group 1	61	15.4	0	Group 1	61	4.233333333333333	0	Group 1	61	15.833333333333334	0	Group 2
62	4.766666666666667	0	Group 1	63	4.76667	0	Group 1	63	58.56666666666667	0	Group 1	62	27.8	1	Group 2	62	71.8333	0	Group 2	62	84.9667	0	Group 1	62	54.833333333333336	0	Group 1	62	78.4	0	Group 1	62	9.06667	0	Group 1	62	54.833333333333336	0	Group 1	62	9.833333333333334	0	Group 2
63	37.166666666666664	0	Group 1	64	37.1667	0	Group 1	64	113.86666666666666	0	Group 1	63	72.2667	0	Group 2	63	11.7667	0	Group 2	63	4	0	Group 1	63	86.7	0	Group 1	63	58.5667	0	Group 1	63	10.4667	0	Group 1	63	86.7	0	Group 1	63	41.56666666666667	0	Group 2
64	35.5	0	Group 1	65	35.5	0	Group 1	65	37.266666666666666	0	Group 1	64	3.53333	0	Group 2	64	31.7333	0	Group 2	64	25.5	0	Group 1	64	61.3	0	Group 1	64	47.8667	0	Group 1	64	68.6667	0	Group 1	64	61.3	0	Group 1	64	14.433333333333334	0	Group 2
65	34.6	0	Group 1	66	34.6	0	Group 1	66	3.8333333333333335	0	Group 1	65	75.4	0	Group 2	65	32.6667	0	Group 2	65	31.6667	0	Group 1	65	31.933333333333334	0	Group 1	65	81.0667	0	Group 1	65	25.0333	1	Group 1	65	31.933333333333334	0	Group 1	65	5.666666666666667	0	Group 2
66	129	0	Group 1	67	129	0	Group 1	67	62.6	0	Group 1	66	73.0667	0	Group 2	66	102.633	0	Group 2	66	10.9333	0	Group 1	66	39.266666666666666	0	Group 1	66	36.4333	0	Group 1	66	52.5333	0	Group 1	66	39.266666666666666	0	Group 1	66	113.63333333333334	0	Group 2
67	61.7	0	Group 1	68	61.7	0	Group 1	68	36.4	0	Group 1	67	17.5	0	Group 2	67	77.4667	0	Group 2	67	98.9667	0	Group 1	67	64.9	0	Group 1	67	93.8	0	Group 1	67	72.6333	0	Group 1	67	64.9	0	Group 1	67	11.566666666666666	0	Group 2
68	60.13333333333333	0	Group 1	69	60.1333	0	Group 1	69	97.56666666666666	0	Group 1	68	94.4	0	Group 2	68	109	0	Group 2	68	9.6	0	Group 1	68	2.2333333333333334	0	Group 1	68	34.7333	0	Group 1	68	32.6667	0	Group 1	68	2.2333333333333334	0	Group 1	68	33.333333333333336	0	Group 2
69	144.96666666666667	0	Group 1	70	144.967	0	Group 1	70	97.56666666666666	0	Group 1	69	32.7667	0	Group 2	69	120.767	0	Group 2	69	8.3	0	Group 1	69	167.36666666666667	0	Group 1	69	113.5	0	Group 1	69	158.167	0	Group 1	69	167.36666666666667	0	Group 1	69	109.76666666666667	0	Group 2
70	93.56666666666666	0	Group 1	71	93.5667	0	Group 1	71	37.43333333333333	0	Group 1	70	59.7	0	Group 2	70	68.2667	0	Group 2	70	95.6	0	Group 1	70	61.7	0	Group 1	70	33.1	0	Group 1	70	31.7333	0	Group 1	70	61.7	0	Group 1	70	7.733333333333333	0	Group 2
71	62.766666666666666	0	Group 1	72	62.7667	0	Group 1	72	60.93333333333333	0	Group 1	71	12.3	0	Group 2	71	118.9	0	Group 2	71	9.1	0	Group 1	71	159.2	0	Group 1	71	75.6333	0	Group 1	71	10	0	Group 1	71	35.5	0	Group 1	71	167.7	0	Group 2
72	36.63333333333333	0	Group 1	73	36.6333	0	Group 1	73	60.9	0	Group 1	72	65.6	0	Group 2	72	13.2	0	Group 2	72	28	0	Group 1	72	105.23333333333333	0	Group 1	72	35	0	Group 1	72	68.6	0	Group 1	72	159.2	0	Group 1	72	63.266666666666666	0	Group 2
73	49.666666666666664	0	Group 1	74	49.6667	0	Group 1	74	61.86666666666667	0	Group 1	73	9.1	0	Group 2	73	12.0667	0	Group 2	73	3.9	0	Group 1	73	60.13333333333333	0	Group 1	73	56	0	Group 1	73	55.2333	0	Group 1	73	105.23333333333333	0	Group 1	73	112.96666666666667	0	Group 2
74	36.2	0	Group 1	75	36.2	0	Group 1	75	88.16666666666667	0	Group 1	74	48.1	0	Group 2	74	83.1333	0	Group 2	74	53.8667	0	Group 1	74	106.7	0	Group 1	74	37.3333	0	Group 1	74	49.7	0	Group 1	74	60.13333333333333	0	Group 1	74	85.53333333333333	0	Group 2
75	60.5	0	Group 1	76	60.5	0	Group 1	76	50.36666666666667	0	Group 1	75	82.0333	0	Group 2	75	115.133	0	Group 2	75	11.1667	0	Group 1	75	83.1	0	Group 1	75	144.8	0	Group 1	75	25.5	0	Group 1	75	96.36666666666666	0	Group 1	75	96.16666666666667	0	Group 2
76	3.2333333333333334	0	Group 1	77	3.23333	0	Group 1	77	61.43333333333333	0	Group 1	76	93.4	0	Group 2	76	85.9	0	Group 2	76	8.6	0	Group 1	76	105.06666666666666	0	Group 1	76	38.2333	0	Group 1	76	37.0333	0	Group 1	76	106.7	0	Group 1	76	65.16666666666667	0	Group 2
77	61.86666666666667	0	Group 1	78	61.8667	0	Group 1	78	49.5	1	Group 1	77	60.2667	0	Group 2	77	11.2667	0	Group 2	77	17.8667	0	Group 1	77	28.9	0	Group 1	77	35.8	0	Group 1	77	55.8	0	Group 1	77	83.1	0	Group 1	77	55.8	0	Group 2
78	31.933333333333334	0	Group 1	79	31.9333	0	Group 1	79	181.33333333333334	0	Group 1	78	35.4667	0	Group 2	78	61.3667	0	Group 2	78	29.2667	0	Group 1	78	36.43333333333333	0	Group 1	78	4.73333	0	Group 1	78	36.4667	0	Group 1	78	105.06666666666666	0	Group 1	78	31	0	Group 2
79	67.4	0	Group 1	80	67.4	0	Group 1	80	69.9	0	Group 1	79	61.1	1	Group 2	79	105.033	0	Group 2	79	29.2667	0	Group 1	79	97.73333333333333	0	Group 1	79	41.8333	0	Group 1	79	71.8333	1	Group 1	79	54.733333333333334	0	Group 1	79	27.833333333333332	1	Group 2
80	88.06666666666666	0	Group 1	81	88.0667	0	Group 1	81	26.133333333333333	0	Group 1	80	59.4667	0	Group 2	80	47.6667	0	Group 2	80	96.1333	0	Group 1	80	35.5	0	Group 1	80	34.5667	0	Group 1	80	31.8667	0	Group 1	80	28.9	0	Group 1	80	134.7	0	Group 2
81	105.06666666666666	0	Group 1	82	105.067	0	Group 1	82	63.766666666666666	0	Group 1	81	50.5667	0	Group 2	81	2.93333	0	Group 2	81	70.1333	0	Group 1	81	34.6	0	Group 1	81	52.7333	0	Group 1	81	9.06667	0	Group 1	81	36.43333333333333	0	Group 1	81	67.6	1	Group 2
82	106.7	0	Group 1	83	106.7	0	Group 1	83	63.56666666666667	0	Group 1	82	30.2667	0	Group 2	82	60.0667	0	Group 2	82	42.2	0	Group 1	82	9.6	0	Group 1	82	124.833	0	Group 1	82	85.9	0	Group 1	82	97.73333333333333	0	Group 1	82	57.666666666666664	1	Group 2
83	203.96666666666667	0	Group 1	84	203.967	0	Group 1	84	29.833333333333332	0	Group 1	83	76.8	0	Group 2	83	76.2	0	Group 2	83	38.9333	0	Group 1	83	4.766666666666667	0	Group 1	83	117.5	0	Group 1	83	42.6333	0	Group 1	83	35.5	0	Group 1	83	107.93333333333334	0	Group 2
84	35.96666666666667	0	Group 1	85	35.9667	0	Group 1	85	49.266666666666666	0	Group 1	84	9.73333	0	Group 2	84	34.5667	0	Group 2	84	32.8333	0	Group 1	84	37.2	0	Group 1	84	67.8	0	Group 1	84	8.96667	0	Group 1	84	57.833333333333336	0	Group 1	84	96.53333333333333	0	Group 2
85	30.233333333333334	0	Group 1	86	30.2333	0	Group 1	86	54.666666666666664	0	Group 1	85	62.3	0	Group 2	85	83.9333	0	Group 2	85	12	0	Group 1	85	54.5	0	Group 1	85	37.6	0	Group 1	85	65.9	0	Group 1	85	34.6	0	Group 1	85	99.1	0	Group 2
86	49.63333333333333	0	Group 1	87	49.6333	0	Group 1	87	67.03333333333333	0	Group 1	86	50.1	0	Group 2	86	5.6	0	Group 2	86	60.2	0	Group 1	86	0.6	0	Group 1	86	2.66667	0	Group 1	86	3.53333	0	Group 1	86	35.233333333333334	0	Group 1	86	122.46666666666667	0	Group 2
87	59.86666666666667	0	Group 1	88	59.8667	0	Group 1	88	3.6	0	Group 1	87	4.26667	0	Group 2	87	88.4333	0	Group 2	87	63.8	0	Group 1	87	106.63333333333334	0	Group 1	87	50.3667	0	Group 1	87	96.3	0	Group 1	87	9.6	0	Group 1	87	123.83333333333333	0	Group 2
88	35.96666666666667	0	Group 1	89	35.9667	0	Group 1	89	35	0	Group 1	88	73.3667	0	Group 2	88	46.2667	0	Group 2	88	30.8333	0	Group 1	88	12.6	0	Group 1	88	94.1	0	Group 1	88	34.3	0	Group 1	88	4.766666666666667	0	Group 1	88	3.033333333333333	0	Group 2
89	64.9	0	Group 1	90	64.9	0	Group 1	90	69.93333333333334	0	Group 1	89	3.83333	0	Group 2	89	98.0333	0	Group 2	89	1.86667	0	Group 1	89	27.7	0	Group 1	89	79.9333	0	Group 1	89	72.5333	0	Group 1	89	37.2	0	Group 1	89	76.93333333333334	0	Group 2
90	37.8	0	Group 1	91	37.8	0	Group 1	91	56.93333333333333	0	Group 1	90	38.6667	0	Group 2	90	83.5333	0	Group 2	90	40.5667	0	Group 1	90	59.733333333333334	0	Group 1	90	7.96667	0	Group 1	90	60.0667	0	Group 1	90	54.5	0	Group 1	90	44	0	Group 2
91	126.16666666666667	0	Group 1	92	126.167	0	Group 1	92	33.86666666666667	0	Group 1	91	59.6667	0	Group 2	91	73.0333	0	Group 2	91	43.8	0	Group 1	91	61.8	0	Group 1	91	20.5667	0	Group 1	91	27.7333	0	Group 1	91	0.6	0	Group 1	91	107.3	0	Group 2
92	153.2	0	Group 1	93	153.2	0	Group 1	93	85.8	0	Group 1	92	3.8	0	Group 2	92	2.6	0	Group 2	92	56.1333	0	Group 1	92	144.96666666666667	0	Group 1	92	49.4	0	Group 1	92	51.3667	0	Group 1	92	106.63333333333334	0	Group 1	92	35.96666666666667	0	Group 2
93	50.13333333333333	0	Group 1	94	50.1333	0	Group 1	94	117.33333333333333	0	Group 1	93	75.6333	0	Group 2	93	126.3	0	Group 2	93	104.767	0	Group 1	93	131.73333333333332	0	Group 1	93	37.4333	0	Group 1	93	6.13333	0	Group 1	93	12.6	0	Group 1	93	11	0	Group 2
94	121.93333333333334	0	Group 1	95	121.933	0	Group 1	95	137.03333333333333	0	Group 1	94	108.467	0	Group 2	94	34.7667	0	Group 2	94	86.1333	0	Group 1	94	55.6	0	Group 1	94	4.16667	0	Group 1	94	75.8333	0	Group 1	94	27.7	0	Group 1	94	128.66666666666666	0	Group 2
95	4.233333333333333	0	Group 1	96	4.23333	0	Group 1	96	100.36666666666666	0	Group 1	95	65.1	0	Group 2	95	3.43333	0	Group 2	95	34.0667	0	Group 1	95	86.13333333333334	0	Group 1	95	70.5333	0	Group 1	95	35.4667	0	Group 1	95	59.733333333333334	0	Group 1	95	12.533333333333333	0	Group 2
96	67.5	0	Group 1	97	67.5	0	Group 1	97	16.733333333333334	0	Group 1	96	72.5667	0	Group 2	96	96.3333	0	Group 2	96	136.167	0	Group 1	96	58.6	0	Group 1	96	37.0333	0	Group 1	96	31.5	0	Group 2	96	74.23333333333333	0	Group 1	96	10.8	0	Group 2
97	86.73333333333333	0	Group 1	98	86.7333	0	Group 1	98	4.233333333333333	0	Group 1	97	16.9333	1	Group 2	97	17.0333	0	Group 2	97	6.2	0	Group 1	97	67.5	0	Group 1	97	2.86667	0	Group 1	97	47.9333	0	Group 2	97	61.8	0	Group 1	97	72.4	0	Group 2
98	121.03333333333333	0	Group 1	99	121.033	0	Group 1	99	64.9	0	Group 1	98	118.033	0	Group 2	98	11.6333	0	Group 2	98	15.6333	0	Group 1	98	26.8	1	Group 1	98	37.5	0	Group 1	98	61.3667	0	Group 2	98	144.96666666666667	0	Group 1	98	28.2	0	Group 2
99	85.73333333333333	0	Group 1	100	85.7333	0	Group 1	100	51.63333333333333	0	Group 1	99	109.433	0	Group 2	99	79.3333	0	Group 2	99	30.2	0	Group 1	99	37.166666666666664	0	Group 1	99	37.4333	0	Group 1	99	2.1	0	Group 2	99	131.73333333333332	0	Group 1	99	104.33333333333333	0	Group 2
100	2.3	0	Group 1	101	2.3	0	Group 1	101	46.36666666666667	0	Group 1	100	136.867	0	Group 2	100	93.2333	0	Group 2	100	54.4333	0	Group 1	100	126.1	0	Group 1	100	69.8333	0	Group 1	100	54.3333	0	Group 2	100	55.6	0	Group 1	100	59.3	0	Group 2
101	24.333333333333332	0	Group 1	102	24.3333	0	Group 1	102	8.333333333333334	0	Group 1	101	63.5	0	Group 2	101	50.7333	0	Group 2	101	36.0333	0	Group 1	101	50.63333333333333	0	Group 1	101	52.3	0	Group 1	101	17.0333	0	Group 2	101	86.13333333333334	0	Group 1	101	84.46666666666667	0	Group 2
102	36.43333333333333	0	Group 1	103	36.4333	0	Group 1	103	134.33333333333334	0	Group 1	102	32	1	Group 2	102	55.1333	0	Group 2	102	75.3	0	Group 1	102	62.766666666666666	0	Group 1	102	49.2	0	Group 1	102	11.7667	0	Group 2	102	58.6	0	Group 1	102	50.5	0	Group 2
103	26.8	1	Group 1	104	26.8	1	Group 1	104	35.666666666666664	0	Group 1	103	12.9667	1	Group 2	103	60.0667	0	Group 2	103	92.8667	0	Group 1	103	50.43333333333333	0	Group 1	103	50.5333	0	Group 1	103	58.8	0	Group 2	103	1.1333333333333333	0	Group 1	103	10.2	0	Group 2
104	94.3	0	Group 1	105	94.3	0	Group 1	105	34.56666666666667	0	Group 1	104	144.633	0	Group 2	104	6.06667	0	Group 2	104	81.5667	0	Group 1	104	86.73333333333333	0	Group 1	104	4.26667	0	Group 1	104	80.3333	0	Group 2	104	67.5	0	Group 1	104	87.46666666666667	0	Group 2
105	10.733333333333333	0	Group 1	106	10.7333	0	Group 1	106	88.06666666666666	0	Group 1	105	14.0333	1	Group 2	105	56.5333	0	Group 2	105	28.1667	0	Group 1	105	97.63333333333334	0	Group 1	105	64.4333	0	Group 1	105	126.367	0	Group 2	105	26.8	1	Group 1	105	4.4	0	Group 2
106	50.9	0	Group 1	107	50.9	0	Group 1	107	111.03333333333333	0	Group 1	106	16.9	1	Group 2	106	36.2667	0	Group 2	106	49.4333	0	Group 1	106	94.5	0	Group 1	106	3.1	0	Group 1	106	109.7	0	Group 2	106	37.166666666666664	0	Group 1	106	81.53333333333333	0	Group 2
107	36.13333333333333	0	Group 1	108	36.1333	0	Group 1	108	3.466666666666667	0	Group 1	107	54.2667	0	Group 2	107	96.7	0	Group 2	107	11.4333	0	Group 1	107	35.96666666666667	0	Group 1	107	57.7	0	Group 1	107	82.6	0	Group 2	107	126.1	0	Group 1	107	37.6	0	Group 2
108	131.33333333333334	0	Group 1	109	131.333	0	Group 1	109	36.166666666666664	0	Group 1	108	15.6333	1	Group 2	108	6.06667	0	Group 2	108	113.8	0	Group 1	108	36.63333333333333	0	Group 1	108	69.8333	0	Group 1	108	99.6667	0	Group 2	108	50.63333333333333	0	Group 1	108	109.63333333333334	0	Group 2
109	54.5	0	Group 1	110	54.5	0	Group 1	110	63.833333333333336	0	Group 1	109	73.7	0	Group 2	109	70.8	0	Group 2	109	3.8	0	Group 1	109	5.766666666666667	0	Group 1	109	89.0333	0	Group 1	109	69.4333	0	Group 2	109	62.766666666666666	0	Group 1	109	134.63333333333333	0	Group 2
110	62.9	0	Group 1	111	62.9	0	Group 1	111	132.7	0	Group 1	110	25.2	1	Group 2	110	19.5	0	Group 2	110	57.3333	0	Group 1	110	121.53333333333333	0	Group 1	110	1.06667	0	Group 1	110	67.5333	0	Group 2	110	50.43333333333333	0	Group 1	110	86.6	0	Group 2
111	106.63333333333334	0	Group 1	112	106.633	0	Group 1	112	121.7	0	Group 1	111	55.3333	0	Group 2	111	139.667	0	Group 2	111	12.6	0	Group 1	111	22.3	0	Group 1	111	59.1667	0	Group 1	111	27.3333	0	Group 2	111	86.73333333333333	0	Group 1	111	101.76666666666667	0	Group 2
112	55.766666666666666	0	Group 1	113	55.7667	0	Group 1	113	33.4	0	Group 1	112	68.3333	0	Group 2	112	85.1	0	Group 2	112	5	0	Group 1	112	72.1	0	Group 1	112	128.033	0	Group 1	112	54	0	Group 2	112	97.63333333333334	0	Group 1	112	15.033333333333333	0	Group 2
113	61.166666666666664	0	Group 1	114	61.1667	0	Group 1	114	33.333333333333336	0	Group 1	113	33.7	1	Group 2	113	122.867	0	Group 2	113	34.3	0	Group 1	113	36.333333333333336	0	Group 1	113	28.4667	0	Group 1	113	83.1333	0	Group 2	113	94.5	0	Group 1	113	43.166666666666664	0	Group 2
114	88.53333333333333	0	Group 1	115	88.5333	0	Group 1	115	64.43333333333334	0	Group 1	114	97.3333	0	Group 2	114	5.6	0	Group 2	114	59.0333	0	Group 1	114	118.76666666666667	0	Group 1	114	60.9	0	Group 1	114	31.4333	0	Group 2	114	35.96666666666667	0	Group 1	114	104.56666666666666	0	Group 2
115	131.43333333333334	0	Group 1	116	131.433	0	Group 1	116	69.53333333333333	0	Group 1	115	24.6667	1	Group 2	115	109.633	0	Group 2	115	37.1667	0	Group 1	115	49.666666666666664	0	Group 1	115	49.5	1	Group 1	115	3.1	0	Group 2	115	36.63333333333333	0	Group 1	115	60.8	0	Group 2
116	32.833333333333336	0	Group 1	117	32.8333	0	Group 1	117	60.46666666666667	0	Group 1	116	15.5667	1	Group 2	116	12.2	0	Group 2	116	59.5333	1	Group 1	116	35.96666666666667	0	Group 1	116	14.7333	0	Group 1	116	82.6	0	Group 2	116	5.766666666666667	0	Group 1	116	120.93333333333334	0	Group 2
117	35.03333333333333	0	Group 1	118	35.0333	0	Group 1	118	54.06666666666667	0	Group 1					117	155.033	0	Group 2	117	116.667	0	Group 1	117	59.03333333333333	0	Group 1	117	56.1333	0	Group 1	117	65.4667	0	Group 2	117	121.53333333333333	0	Group 1	117	61.6	0	Group 2
118	37.2	0	Group 1	119	37.2	0	Group 1	119	24.6	0	Group 1					118	29.6333	0	Group 2	118	32.2667	0	Group 1	118	52.63333333333333	0	Group 1	118	8.33333	0	Group 1	118	45.9333	0	Group 2	118	35.266666666666666	0	Group 1	118	37.96666666666667	0	Group 2
119	52.2	0	Group 1	120	52.2	0	Group 1	120	52.166666666666664	0	Group 1					119	67.7333	1	Group 2	119	26.0333	0	Group 1	119	51.266666666666666	0	Group 1	119	74.4333	1	Group 1	119	32.1667	0	Group 2	119	22.3	0	Group 1	119	41.166666666666664	0	Group 2
120	36.4	0	Group 1	121	36.4	0	Group 1	121	36.53333333333333	0	Group 1					120	43.9333	0	Group 2	120	36.9667	0	Group 1	120	27.333333333333332	0	Group 1	120	36.6667	0	Group 1	120	36.8	0	Group 2	120	72.1	0	Group 1	120	18.266666666666666	0	Group 2
121	82.36666666666666	0	Group 1	122	82.3667	0	Group 1	122	55.333333333333336	0	Group 1					121	91.0667	0	Group 2	121	6.76667	0	Group 1	121	62.03333333333333	0	Group 1	121	25.5333	0	Group 1	121	12	0	Group 2	121	36.333333333333336	0	Group 1	121	97.86666666666666	0	Group 2
122	72.9	0	Group 1	123	72.9	0	Group 1	123	17.133333333333333	1	Group 1					122	36.8333	0	Group 2	122	55.9333	0	Group 1	122	77.73333333333333	0	Group 1	122	57.6333	0	Group 1	122	116.367	0	Group 2	122	118.76666666666667	0	Group 1	122	116.83333333333333	0	Group 2
123	3.8333333333333335	0	Group 1	124	3.83333	0	Group 1	124	0.13333333333333333	0	Group 1					123	108.533	0	Group 2	123	101.333	0	Group 1	123	112.56666666666666	0	Group 1	123	56.9333	0	Group 1	123	79.4333	0	Group 2	123	49.666666666666664	0	Group 1	123	97.93333333333334	0	Group 2
124	29.466666666666665	0	Group 1	125	29.4667	0	Group 1	125	121.66666666666667	0	Group 1					124	10.0333	0	Group 2	124	57.5	0	Group 1	124	99.6	0	Group 1	124	25.1667	0	Group 1	124	126.9	0	Group 2	124	35.96666666666667	0	Group 1	124	3.1666666666666665	0	Group 2
125	29.733333333333334	0	Group 1	126	29.7333	0	Group 1	126	126.1	0	Group 1					125	5.83333	0	Group 2	125	35.7	0	Group 1	125	35.03333333333333	0	Group 1	125	63.7667	0	Group 1	125	55.4333	0	Group 2	125	59.03333333333333	0	Group 1	125	71.56666666666666	0	Group 2
126	6.433333333333334	0	Group 1	127	6.43333	0	Group 1	127	144.8	0	Group 1					126	5.56667	0	Group 2	126	93.7667	0	Group 1	126	122.86666666666666	0	Group 1	126	49.7	0	Group 1	126	55.6333	0	Group 2	126	52.63333333333333	0	Group 1	126	29.266666666666666	0	Group 2
127	57.3	0	Group 1	128	57.3	0	Group 1	128	36.7	0	Group 1					127	66.0333	0	Group 2	127	71.2	0	Group 1	127	50.233333333333334	0	Group 1	127	108.367	0	Group 1	127	34.7667	0	Group 2	127	51.266666666666666	0	Group 1	127	11	0	Group 2
128	59.03333333333333	0	Group 1	129	59.0333	0	Group 1	129	121.03333333333333	0	Group 1					128	85.0667	1	Group 2	128	52.4667	0	Group 1	128	59.86666666666667	0	Group 1	128	121.033	0	Group 1	128	60.4667	0	Group 2	128	27.333333333333332	0	Group 1	128	76.96666666666667	0	Group 2
129	111.86666666666666	0	Group 1	130	111.867	0	Group 1	130	25.033333333333335	1	Group 1					129	69.6333	1	Group 2	129	28	0	Group 1	129	104.06666666666666	0	Group 1	129	61.8667	0	Group 1	129	138.9	0	Group 2	129	81.9	0	Group 1	129	80.23333333333333	0	Group 2
130	12.1	0	Group 1	131	12.1	0	Group 1	131	87.8	0	Group 1					130	10.7	0	Group 2	130	52.8333	0	Group 1	130	20.833333333333332	0	Group 1	130	88.0667	0	Group 1	130	34.5667	0	Group 2	130	62.03333333333333	0	Group 1	130	45.3	0	Group 2
131	11	0	Group 1	132	11	0	Group 1	132	61.96666666666667	0	Group 1					131	5.73333	0	Group 2	131	108.133	0	Group 1	131	36.6	0	Group 1	131	61.8667	0	Group 1	131	86.2667	0	Group 2	131	77.73333333333333	0	Group 1	131	129.33333333333334	0	Group 2
132	64.2	0	Group 1	133	64.2	0	Group 1	133	53.46666666666667	0	Group 1					132	83.2667	0	Group 2	132	120.9	0	Group 1	132	110.63333333333334	0	Group 1	132	1.93333	0	Group 1	132	171.467	0	Group 2	132	112.56666666666666	0	Group 1	132	3	0	Group 2
133	34.53333333333333	0	Group 1	134	34.5333	0	Group 1	134	14.066666666666666	0	Group 1					133	81.4	0	Group 2	133	38.0667	0	Group 1	133	52.2	0	Group 1	133	34.4333	0	Group 1	133	2.6	0	Group 2	133	99.6	0	Group 1	133	4.366666666666666	0	Group 2
134	121.36666666666666	0	Group 1	135	121.367	0	Group 1	135	111.8	0	Group 1					134	112.233	0	Group 2	134	61.4	0	Group 1	134	80.7	0	Group 1	134	61.4333	0	Group 1	134	98.0333	0	Group 2	134	35.03333333333333	0	Group 1	134	162.53333333333333	0	Group 2
135	1.1333333333333333	0	Group 1	136	1.13333	0	Group 1	136	101.53333333333333	0	Group 1					135	11.4333	0	Group 2	135	54.5667	0	Group 1	135	48.06666666666667	0	Group 1	135	132.7	0	Group 1	135	106.167	0	Group 2	135	122.86666666666666	0	Group 1	135	142.3	0	Group 2
136	3.3333333333333335	0	Group 1	137	3.33333	0	Group 1	137	124.53333333333333	0	Group 1					136	6.83333	0	Group 2	136	1.4	0	Group 1	136	72.9	0	Group 1	136	42.5333	0	Group 1	136	26.8667	0	Group 2	136	50.233333333333334	0	Group 1	136	90.96666666666667	1	Group 2
137	36.86666666666667	0	Group 1	138	36.8667	0	Group 1	138	73	0	Group 1					137	129.533	1	Group 2	137	30.3667	0	Group 1	137	3.8333333333333335	0	Group 1	137	88.1667	0	Group 1	137	11.8667	0	Group 2	137	59.86666666666667	0	Group 1	137	101.3	0	Group 2
138	58.6	0	Group 1	139	58.6	0	Group 1	139	3.8	0	Group 1					138	30.5333	0	Group 2	138	46.9	0	Group 1	138	86.86666666666666	0	Group 1	138	105.433	0	Group 1	138	33.6333	0	Group 2	138	104.06666666666666	0	Group 1	138	11.633333333333333	0	Group 2
139	61.9	0	Group 1	140	61.9	0	Group 1	140	47.6	0	Group 1					139	61.1	0	Group 2	139	34.5	0	Group 1	139	203.96666666666667	0	Group 1	139	117.933	0	Group 1	139	34.1333	0	Group 2	139	20.833333333333332	0	Group 1	139	48.4	0	Group 2
140	87.9	0	Group 1	141	87.9	0	Group 1	141	72.3	0	Group 1					140	159.133	0	Group 2	140	3.63333	0	Group 2	140	34.53333333333333	0	Group 1	140	78.7	0	Group 1	140	68.5667	0	Group 2	140	36.6	0	Group 1	140	91.46666666666667	0	Group 2
141	27.033333333333335	0	Group 1	142	27.0333	0	Group 1	142	19.733333333333334	0	Group 1					141	132.1	0	Group 2	141	37.2667	0	Group 2	141	100.1	0	Group 1	141	53.4667	0	Group 1	141	60.4	0	Group 2	141	110.63333333333334	0	Group 1	141	12.633333333333333	0	Group 2
142	13.7	0	Group 1	143	13.7	0	Group 1	143	96.2	0	Group 1					142	33.3333	0	Group 2	142	98.8333	0	Group 2	142	29.466666666666665	0	Group 1	142	62.6	0	Group 1	142	80.1667	0	Group 2	142	52.2	0	Group 1	142	60.8	0	Group 2
143	25.7	0	Group 1	144	25.7	0	Group 1	144	27.266666666666666	0	Group 1					143	5.53333	0	Group 2	143	61.7667	0	Group 2	143	83.53333333333333	0	Group 1	143	111.8	0	Group 1	143	96.3333	0	Group 2	143	80.7	0	Group 1	143	67.6	0	Group 2
144	96.36666666666666	0	Group 1	145	96.3667	0	Group 1	145	128.13333333333333	1	Group 1					144	116.9	0	Group 2	144	11.8333	0	Group 2	144	36.46666666666667	0	Group 1	144	37.2333	0	Group 1	144	59.2	0	Group 2	144	57.3	0	Group 1	144	10.5	0	Group 2
145	125	0	Group 1	146	125	0	Group 1	146	67.53333333333333	0	Group 1					145	5.26667	0	Group 2	145	62.3667	0	Group 2	145	89.16666666666667	0	Group 1	145	37.2667	0	Group 1	145	37.7667	0	Group 2	145	48.06666666666667	0	Group 1	145	96.16666666666667	0	Group 2
146	59.733333333333334	0	Group 1	147	59.7333	0	Group 1	147	23.333333333333332	0	Group 1					146	131.8	0	Group 2	146	108.467	0	Group 2	146	3.5	0	Group 1	146	79.7667	0	Group 1	146	60.6	0	Group 2	146	72.9	0	Group 1	146	35.9	0	Group 2
147	36.63333333333333	0	Group 1	148	36.6333	0	Group 1	148	48.733333333333334	0	Group 1					147	72.1	0	Group 2	147	93.4	0	Group 2	147	35.7	0	Group 1	147	25.8667	0	Group 1	147	47.6667	0	Group 2	147	11	0	Group 1	147	103.53333333333333	0	Group 2
148	143.33333333333334	0	Group 1	149	143.333	0	Group 1	149	26.466666666666665	0	Group 1					148	47.4	0	Group 2	148	9.56667	0	Group 2	148	58.6	0	Group 1	148	26.1	0	Group 1	148	10.7	0	Group 2	148	3.8333333333333335	0	Group 1	148	45	0	Group 2
149	100.53333333333333	0	Group 1	150	100.533	0	Group 1	150	36.86666666666667	0	Group 1					149	118.8	0	Group 2	149	52.9333	0	Group 2	149	85.73333333333333	0	Group 1	149	97.5667	0	Group 1	149	19	0	Group 2	149	86.86666666666666	0	Group 1	149	92.66666666666667	0	Group 2
150	113.7	0	Group 1	151	113.7	0	Group 1	151	145.46666666666667	0	Group 1					150	5.83333	0	Group 2	150	26.9333	0	Group 2	150	126.16666666666667	0	Group 1	150	87.7667	0	Group 1	150	35.8333	0	Group 2	150	203.96666666666667	0	Group 1	150	5.533333333333333	0	Group 2
151	25.9	0	Group 1	152	25.9	0	Group 1	152	126.1	0	Group 1					151	117.267	0	Group 2	151	12.6333	0	Group 2	151	31.5	0	Group 1	151	31.3333	0	Group 1	151	17.9333	0	Group 2	151	34.53333333333333	0	Group 1	151	2.9	0	Group 2
152	100.76666666666667	0	Group 1	153	100.767	0	Group 1	153	49.8	0	Group 1					152	50.2667	1	Group 2	152	49.5333	0	Group 2	152	60.63333333333333	0	Group 1	152	97.7333	0	Group 1	152	40.3667	0	Group 2	152	100.1	0	Group 1	152	27	0	Group 2
153	6.733333333333333	0	Group 1	154	6.73333	0	Group 1	154	144.56666666666666	0	Group 1					153	114.833	0	Group 2	153	2.26667	0	Group 2	153	36.2	0	Group 1	153	58.4667	0	Group 1	153	134.267	0	Group 2	153	29.466666666666665	0	Group 1	153	56.333333333333336	0	Group 2
154	129.2	0	Group 1	155	129.2	0	Group 1	155	6.133333333333334	0	Group 1					154	13.1667	0	Group 2	154	78.4	0	Group 2	154	23.166666666666668	0	Group 1	154	62.2333	0	Group 1	154	5.6	0	Group 2	154	83.53333333333333	0	Group 1	154	33.333333333333336	0	Group 2
155	122.53333333333333	0	Group 1	156	122.533	0	Group 1	156	59.333333333333336	0	Group 1					155	91.2333	0	Group 2	155	67.2	0	Group 2	155	36.86666666666667	0	Group 1	155	19.7333	0	Group 1	155	55.1333	0	Group 2	155	36.46666666666667	0	Group 1	155	35.86666666666667	0	Group 2
156	98.8	0	Group 1	157	98.8	0	Group 1	157	75.43333333333334	0	Group 1					156	29.6	0	Group 2	156	116.133	0	Group 2	156	33.46666666666667	0	Group 1	156	26.1333	0	Group 1	156	57.7333	0	Group 2	156	10.733333333333333	0	Group 1	156	96.7	0	Group 2
157	35.6	0	Group 1	158	35.6	0	Group 1	158	96.33333333333333	0	Group 1					157	49.9	0	Group 2	157	47.1667	0	Group 2	157	115.5	0	Group 1	157	69.5333	0	Group 1	157	111.833	0	Group 2	157	89.16666666666667	0	Group 1	157	53.666666666666664	0	Group 2
158	2.7666666666666666	0	Group 1	159	2.76667	0	Group 1	159	115.03333333333333	0	Group 1					158	116.367	0	Group 2	158	88.2	0	Group 2	158	25.9	0	Group 1	158	97.5667	0	Group 1	158	82.8667	0	Group 2	158	3.5	0	Group 1	158	7.9	0	Group 2
159	25.933333333333334	0	Group 1	160	25.9333	0	Group 1	160	96.56666666666666	0	Group 1					159	37.9667	1	Group 2	159	49	0	Group 2	159	90.76666666666667	0	Group 1	159	39.9333	0	Group 1	159	93.1	1	Group 2	159	35.7	0	Group 1	159	100.53333333333333	0	Group 2
160	31.633333333333333	0	Group 1	161	31.6333	0	Group 1	161	133.33333333333334	0	Group 1					160	35.2	0	Group 2	160	121.033	0	Group 2	160	55.766666666666666	0	Group 1	160	3.83333	0	Group 1	160	36.8667	0	Group 2	160	58.6	0	Group 1	160	102.63333333333334	0	Group 2
161	55.1	0	Group 1	162	55.1	0	Group 1	162	38.53333333333333	0	Group 1					161	123.2	0	Group 2	161	55.0333	0	Group 2	161	75.2	0	Group 1	161	88.3667	0	Group 1	161	3.43333	0	Group 2	161	85.73333333333333	0	Group 1	161	22.033333333333335	1	Group 2
162	85.03333333333333	0	Group 1	163	85.0333	0	Group 1	163	36.13333333333333	0	Group 1					162	84.2	0	Group 2	162	56.4667	0	Group 2	162	94.3	0	Group 1	162	75.6	0	Group 1	162	51.7667	0	Group 2	162	85.03333333333333	0	Group 1	162	59.666666666666664	0	Group 2
163	106.76666666666667	0	Group 1	164	106.767	0	Group 1	164	27.8	0	Group 1									163	58.6667	0	Group 2	163	49.63333333333333	0	Group 1	163	30.7	0	Group 1	163	10.7333	0	Group 2	163	126.16666666666667	0	Group 1	163	115.76666666666667	0	Group 2
164	97.63333333333334	0	Group 1	165	97.6333	0	Group 1	165	58.36666666666667	0	Group 1									164	96.3333	0	Group 2	164	37.8	0	Group 1	164	35.2	0	Group 1	164	104.033	0	Group 2	164	31.5	0	Group 1	164	98.33333333333333	0	Group 2
165	59.8	0	Group 1	166	59.8	0	Group 1	166	99.3	0	Group 1									165	98.3333	0	Group 2	165	35.96666666666667	0	Group 1	165	51.6333	0	Group 1	165	3	0	Group 2	165	60.63333333333333	0	Group 1	165	36.43333333333333	0	Group 2
166	75.2	0	Group 1	167	75.2	0	Group 1	167	57.7	0	Group 1									166	91.6667	0	Group 2	166	1.5333333333333334	0	Group 1	166	60.9333	0	Group 1	166	10.7	0	Group 2	166	36.2	0	Group 1	166	33.56666666666667	0	Group 2
167	13.766666666666667	0	Group 1	168	13.7667	0	Group 1	168	133	0	Group 1									167	157.767	0	Group 2	167	32.6	0	Group 1	167	17.1333	1	Group 1	167	27.8	1	Group 2	167	23.166666666666668	0	Group 1	167	4.333333333333333	0	Group 2
168	134.96666666666667	0	Group 1	169	134.967	0	Group 1	169	11.666666666666666	0	Group 1									168	59.4333	0	Group 2	168	33.93333333333333	0	Group 1	168	48.7667	0	Group 1	168	106.667	0	Group 2	168	36.86666666666667	0	Group 1	168	94.26666666666667	0	Group 2
169	48.06666666666667	0	Group 1	170	48.0667	0	Group 1	170	37.86666666666667	0	Group 1									169	59.4667	0	Group 2	169	129	0	Group 1	169	96.5667	0	Group 1	169	83.2667	0	Group 2	169	33.46666666666667	0	Group 1	169	95.33333333333333	0	Group 2
170	11.133333333333333	0	Group 1	171	11.1333	0	Group 1	171	10.466666666666667	0	Group 1									170	74.3667	0	Group 2	170	135.6	0	Group 1	170	62.0333	0	Group 1	170	11.6	0	Group 2	170	68.4	0	Group 1	170	7.033333333333333	0	Group 2
171	162.46666666666667	0	Group 1	172	162.467	0	Group 1	172	134.5	0	Group 1									171	52.5333	0	Group 2	171	60.5	0	Group 1	171	25.2	0	Group 1	171	56.7	0	Group 2	171	82.36666666666666	0	Group 1	171	53.233333333333334	0	Group 2
172	30.333333333333332	0	Group 1	173	30.3333	0	Group 1	173	115.23333333333333	0	Group 1									172	36.4667	0	Group 2	172	65.26666666666667	0	Group 1	172	37.4333	0	Group 1	172	70.9333	0	Group 2	172	115.5	0	Group 1	172	47.166666666666664	0	Group 2
173	8.533333333333333	0	Group 1	174	8.53333	0	Group 1	174	97.4	0	Group 1									173	108.5	0	Group 2	173	128.3	0	Group 1	173	96.1667	0	Group 1	173	35.9	0	Group 2	173	25.9	0	Group 1	173	75.36666666666666	0	Group 2
174	51.3	0	Group 1	175	51.3	0	Group 1	175	94.03333333333333	0	Group 1									174	1.56667	0	Group 2	174	49.63333333333333	0	Group 1	174	62.7667	0	Group 1	174	72.2667	0	Group 2	174	90.76666666666667	0	Group 1	174	128.53333333333333	0	Group 2
175	1.5333333333333334	0	Group 1	176	1.53333	0	Group 1	176	26.1	0	Group 1									175	27	0	Group 2	175	50.9	0	Group 1	175	11.6667	0	Group 1	175	3.53333	0	Group 2	175	55.766666666666666	0	Group 1	175	116.53333333333333	0	Group 2
176	88.7	0	Group 1	177	88.7	0	Group 1	177	24.1	0	Group 1									176	113.6	0	Group 2	176	93.56666666666666	0	Group 1	176	36.7	0	Group 1	176	32.8	0	Group 2	176	75.2	0	Group 1	176	3.966666666666667	0	Group 2
177	23.166666666666668	0	Group 1	178	23.1667	0	Group 1	178	56.6	0	Group 1									177	3.76667	0	Group 2	177	131.33333333333334	0	Group 1	177	59	0	Group 1	177	81.4	0	Group 2	177	94.3	0	Group 1	177	31.033333333333335	1	Group 2
178	59.6	0	Group 1	179	59.6	0	Group 1	179	4	0	Group 1									178	6.56667	0	Group 2	178	81.46666666666667	0	Group 1	178	96.2	0	Group 1	178	96.7	0	Group 2	178	49.63333333333333	0	Group 1	178	87.1	0	Group 2
179	73.63333333333334	0	Group 1	180	73.6333	0	Group 1	180	30.766666666666666	0	Group 1									179	83.9333	0	Group 2	179	96.36666666666666	0	Group 1	179	85.8	0	Group 1	179	75.4	0	Group 2	179	86.63333333333334	0	Group 1	179	5.7	0	Group 2
180	61.766666666666666	0	Group 1	181	61.7667	0	Group 1	181	108.5	0	Group 1									180	98.7	0	Group 2	180	30.333333333333332	0	Group 1	180	2.7	0	Group 1	180	9.56667	0	Group 2	180	37.8	0	Group 1	180	100.56666666666666	0	Group 2
181	36.93333333333333	0	Group 1	182	36.9333	0	Group 1	182	85.2	0	Group 1									181	14.7667	0	Group 2	181	2.3	0	Group 1	181	37.1	0	Group 1	181	33.5667	0	Group 2	181	35.96666666666667	0	Group 1	181	129.23333333333332	0	Group 2
182	111.7	0	Group 1	183	111.7	0	Group 1	183	58.46666666666667	0	Group 1									182	151.333	0	Group 2	182	24.333333333333332	0	Group 1	182	69.9333	0	Group 1	182	60.0667	0	Group 2	182	1.5333333333333334	0	Group 1	182	86.96666666666667	0	Group 2
183	62.03333333333333	0	Group 1	184	62.0333	0	Group 1	184	85.76666666666667	0	Group 1									183	12.8	0	Group 2	183	53.86666666666667	0	Group 1	183	36.1333	0	Group 1	183	77.4333	0	Group 2	183	36.56666666666667	0	Group 1	183	46.4	0	Group 2
184	113.8	0	Group 1	185	113.8	0	Group 1	185	70.56666666666666	0	Group 1									184	99.7667	0	Group 2	184	36.43333333333333	0	Group 1	184	31.3667	0	Group 1	184	97.3333	0	Group 2	184	32.6	0	Group 1	184	73.3	0	Group 2
185	113.23333333333333	0	Group 1	186	113.233	0	Group 1	186	31.833333333333332	0	Group 1									185	35.8333	0	Group 2	185	108.26666666666667	0	Group 1	185	24.6	0	Group 1	185	1.83333	0	Group 2	185	33.93333333333333	0	Group 1	185	83.36666666666666	0	Group 2
186	6.2	0	Group 1	187	6.2	0	Group 1	187	138.7	0	Group 1									186	13.7667	0	Group 2	186	49.4	0	Group 1	186	35.2667	0	Group 1	186	83.5333	0	Group 2	186	129	0	Group 1	186	35.9	0	Group 2
187	95.93333333333334	0	Group 1	188	95.9333	0	Group 1	188	60.43333333333333	0	Group 1									187	57.9667	0	Group 2	187	108.26666666666667	0	Group 1	187	128.133	1	Group 1	187	3.43333	0	Group 2	187	135.6	0	Group 1	187	1.6	0	Group 2
188	101.33333333333333	0	Group 1	189	101.333	0	Group 1	189	83.76666666666667	0	Group 1									188	10.4333	0	Group 2	188	82.76666666666667	0	Group 1	188	5.63333	0	Group 1	188	66.1333	0	Group 2	188	60.5	0	Group 1	188	45.833333333333336	1	Group 2
189	51.46666666666667	0	Group 1	190	51.4667	0	Group 1	190	130.63333333333333	0	Group 1									189	47	0	Group 2	189	106.76666666666667	0	Group 1	189	30.5333	0	Group 1	189	73.0667	0	Group 2	189	13.7	0	Group 1	189	141.73333333333332	0	Group 2
190	5.2	0	Group 1	191	5.2	0	Group 1	191	87.26666666666667	0	Group 1									190	6.86667	0	Group 2	190	62.9	0	Group 1	190	60.4333	0	Group 1	190	17.5	0	Group 2	190	65.26666666666667	0	Group 1	190	2	0	Group 2
191	31.666666666666668	0	Group 1	192	31.6667	0	Group 1	192	109.23333333333333	0	Group 1									191	57.4667	0	Group 2	191	36.46666666666667	0	Group 1	191	16.7333	0	Group 1	191	36.6667	0	Group 2	191	128.3	0	Group 1	191	53.266666666666666	1	Group 2
192	143.93333333333334	0	Group 1	193	143.933	0	Group 1	193	98.7	0	Group 1									192	15.8333	0	Group 2	192	61.166666666666664	0	Group 1	192	3.6	0	Group 1	192	105.033	0	Group 2	192	49.63333333333333	0	Group 1	192	10	0	Group 2
193	33.46666666666667	0	Group 1	194	33.4667	0	Group 1	194	38	0	Group 1									193	31.5	0	Group 2	193	68.9	0	Group 1	193	49.2667	0	Group 1	193	30.5333	0	Group 2	193	50.9	0	Group 1	193	75.66666666666667	0	Group 2
194	35.43333333333333	0	Group 1	195	35.4333	0	Group 1	195	45.96666666666667	0	Group 1									194	9.83333	0	Group 2	194	153.2	0	Group 1	194	83.3333	0	Group 1	194	6.3	0	Group 2	194	93.56666666666666	0	Group 1	194	158.6	0	Group 2
195	68.9	0	Group 1	196	68.9	0	Group 1	196	61.5	0	Group 1									195	34.6333	0	Group 2	195	1.1333333333333333	0	Group 1	195	63.5667	0	Group 1	195	51.6	0	Group 2	195	70.23333333333333	0	Group 1	195	97.4	0	Group 2
196	9.566666666666666	0	Group 1	197	9.56667	0	Group 1	197	35.833333333333336	0	Group 1									196	10	0	Group 2	196	55.1	0	Group 1	196	26.2	0	Group 1	196	19.5	0	Group 2	196	131.33333333333334	0	Group 1	196	99.86666666666666	0	Group 2
197	135.8	0	Group 1	198	135.8	0	Group 1	198	69.66666666666667	0	Group 1									197	84.2	0	Group 2	197	119.76666666666667	0	Group 1	197	27.2667	0	Group 1	197	126.3	0	Group 2	197	69.76666666666667	0	Group 1	197	36.3	0	Group 2
198	51.56666666666667	0	Group 1	199	51.5667	0	Group 1	199	44.833333333333336	0	Group 1									198	14.4333	0	Group 2	198	35.6	0	Group 1	198	36.4	0	Group 1	198	136.067	0	Group 2	198	81.46666666666667	0	Group 1	198	60.86666666666667	1	Group 2
199	82.76666666666667	0	Group 1	200	82.7667	0	Group 1	200	36.43333333333333	0	Group 1									199	83.3667	0	Group 2	199	2.7666666666666666	0	Group 1	199	29.8333	0	Group 1	199	40.7	1	Group 2	199	96.36666666666666	0	Group 1	199	94.3	0	Group 2
200	60.4	0	Group 1	201	60.4	0	Group 1	201	111.66666666666667	0	Group 1									200	5.66667	0	Group 2	200	113.96666666666667	0	Group 1	200	11.1333	0	Group 1	200	37.8667	1	Group 2	200	30.333333333333332	0	Group 1	200	84.8	1	Group 2
201	25.333333333333332	0	Group 1	202	25.3333	0	Group 1	202	107.3	0	Group 1									201	96.2333	0	Group 2	201	93.13333333333334	0	Group 1	201	182.033	0	Group 1	201	5.36667	0	Group 2	201	2.3	0	Group 1	201	3.8	0	Group 2
202	112.33333333333333	0	Group 1	203	112.333	0	Group 1	203	31.8	0	Group 1									202	52.6667	0	Group 2	202	128.3	0	Group 1	202	67.5333	0	Group 1	202	71.8333	0	Group 2	202	24.333333333333332	0	Group 1	202	5.733333333333333	0	Group 2
203	136.16666666666666	0	Group 1	204	136.167	0	Group 1	204	36.63333333333333	0	Group 1									203	113.633	0	Group 2	203	31.866666666666667	0	Group 1	203	86.5	0	Group 1	203	62.8667	0	Group 2	203	53.86666666666667	0	Group 1	203	10.033333333333333	0	Group 2
204	33.93333333333333	1	Group 1	205	33.9333	1	Group 1	205	180.2	0	Group 1									204	86.8	0	Group 2	204	85.53333333333333	0	Group 1	204	126.233	0	Group 1	204	94.4	0	Group 2	204	36.43333333333333	0	Group 1	204	2.1666666666666665	0	Group 2
205	110.63333333333334	0	Group 1	206	110.633	0	Group 1	206	11.533333333333333	0	Group 1									205	11.5667	0	Group 2	205	1.9	0	Group 1	205	33.8667	0	Group 1	205	5.76667	0	Group 2	205	108.26666666666667	0	Group 1	205	95.83333333333333	0	Group 2
206	26.933333333333334	0	Group 1	207	26.9333	0	Group 1	207	114.7	0	Group 1									206	33.3333	0	Group 2	206	27.033333333333335	0	Group 1	206	144.567	0	Group 1	206	78.1	0	Group 2	206	49.4	0	Group 1	206	70.46666666666667	0	Group 2
207	36.6	0	Group 1	208	36.6	0	Group 1	208	36.233333333333334	0	Group 1									207	40.3333	0	Group 2	207	25.933333333333334	0	Group 1	207	12.3333	0	Group 1	207	32.7667	0	Group 2	207	108.26666666666667	0	Group 1	207	3.7333333333333334	0	Group 2
208	53.86666666666667	0	Group 1	209	53.8667	0	Group 1	209	59.53333333333333	0	Group 1									208	61.2333	0	Group 2	208	59.96666666666667	0	Group 1	208	98.7667	0	Group 1	208	158.967	0	Group 2	208	36.6	0	Group 1	208	78.43333333333334	0	Group 2
209	50.1	0	Group 1	210	50.1	0	Group 1	210	188.8	0	Group 1									209	103.133	0	Group 2	209	59.6	0	Group 1	209	36.1667	0	Group 1	209	139.667	0	Group 2	209	61.9	0	Group 1	209	29.333333333333332	0	Group 2
210	34.13333333333333	0	Group 1	211	34.1333	0	Group 1	211	56.96666666666667	0	Group 1									210	112.333	0	Group 2	210	73.33333333333333	0	Group 1	210	36.3667	0	Group 1	210	59.7	0	Group 2	210	82.76666666666667	0	Group 1	210	99.06666666666666	0	Group 2
211	88.66666666666667	0	Group 1	212	88.6667	0	Group 1	212	148.53333333333333	0	Group 1									211	109.767	0	Group 2	211	95.46666666666667	0	Group 1	211	63.8333	0	Group 1	211	60.2333	0	Group 2	211	106.76666666666667	0	Group 1	211	108.43333333333334	0	Group 2
212	28	0	Group 1	213	28	0	Group 1	213	5.366666666666666	0	Group 1									212	37.2	0	Group 2	212	64.2	0	Group 1	212	54.6667	0	Group 1	212	12.3	0	Group 2	212	15.166666666666666	0	Group 1	212	25.1	1	Group 2
213	8.3	0	Group 1	214	8.3	0	Group 1	214	67.53333333333333	0	Group 1									213	7.73333	0	Group 2	213	33.93333333333333	1	Group 1	213	33.4	0	Group 1	213	65.6	0	Group 2	213	62.9	0	Group 1	213	96.36666666666666	0	Group 2
214	104.13333333333334	0	Group 1	215	104.133	0	Group 1	215	172.16666666666666	0	Group 1									214	167.7	0	Group 2	214	3.3333333333333335	0	Group 1	214	144.933	0	Group 1	214	109.633	0	Group 2	214	36.46666666666667	0	Group 1	214	79.63333333333334	1	Group 2
215	36.9	0	Group 1	216	36.9	0	Group 1	216	60.2	0	Group 1									215	73.6333	0	Group 2	215	66.13333333333334	0	Group 1	215	55.3333	0	Group 1	215	4	0	Group 2	215	61.166666666666664	0	Group 1	215	39	0	Group 2
216	72.76666666666667	0	Group 1	217	72.7667	0	Group 1	217	3.3333333333333335	0	Group 1									216	112.967	0	Group 2	216	35.43333333333333	0	Group 1	216	86.9667	0	Group 1	216	141.833	0	Group 2	216	68.9	0	Group 1	216	75.36666666666666	0	Group 2
217	131.8	0	Group 1	218	131.8	0	Group 1	218	65.46666666666667	0	Group 1									217	97.1	0	Group 2	217	37.56666666666667	0	Group 1	217	181.333	0	Group 1	217	9.1	0	Group 2	217	11.133333333333333	0	Group 1	217	35.733333333333334	0	Group 2
218	93.76666666666667	0	Group 1	219	93.7667	0	Group 1	219	84.26666666666667	0	Group 1									218	100.533	0	Group 2	218	74.46666666666667	0	Group 1	218	75.4333	0	Group 1	218	48.1	0	Group 2	218	53.43333333333333	0	Group 1	218	60.06666666666667	0	Group 2
219	97.1	0	Group 1	220	97.1	0	Group 1	220	3.2	0	Group 1									219	88.7	0	Group 2	219	2.1333333333333333	0	Group 1	219	111.967	0	Group 1	219	10.3	0	Group 2	219	8.533333333333333	0	Group 1	219	3.2666666666666666	0	Group 2
220	30.2	0	Group 1	221	30.2	0	Group 1	221	0.7333333333333333	0	Group 1									220	36.2333	0	Group 2	220	27.5	0	Group 1	220	117.567	0	Group 1	220	82.0333	0	Group 2	220	153.2	0	Group 1	220	3.7666666666666666	0	Group 2
221	79.3	0	Group 1	222	79.3	0	Group 1	222	97.1	0	Group 1									221	85.5333	0	Group 2	221	25.7	0	Group 1	221	48.8	0	Group 1	221	33.0333	0	Group 2	221	1.1333333333333333	0	Group 1	221	33.93333333333333	0	Group 2
222	3.9	0	Group 1	223	3.9	0	Group 1	223	26.9	0	Group 1									222	96.1667	0	Group 2	222	37.3	0	Group 1	222	132.7	0	Group 1	222	159.133	0	Group 2	222	55.1	0	Group 1	222	13.266666666666667	0	Group 2
223	59.96666666666667	0	Group 1	224	59.9667	0	Group 1	224	73.06666666666666	0	Group 1									223	51.6333	0	Group 2	223	97.03333333333333	0	Group 1	223	82.4667	0	Group 1	223	97.1667	0	Group 2	223	119.76666666666667	0	Group 1	223	119.63333333333334	0	Group 2
224	99.93333333333334	0	Group 1	225	99.9333	0	Group 1	225	34.766666666666666	0	Group 1									224	3.96667	0	Group 2	224	5.666666666666667	0	Group 1	224	70.6	0	Group 1	224	98.5	0	Group 2	224	35.6	0	Group 1	224	1.7	0	Group 2
225	57.166666666666664	0	Group 1	226	57.1667	0	Group 1	226	5.133333333333334	0	Group 1									225	72.0333	0	Group 2	225	83.1	0	Group 1	225	111.667	0	Group 1	225	36.8333	0	Group 2	225	2.7666666666666666	0	Group 1	225	70.46666666666667	0	Group 2
226	25.366666666666667	0	Group 1	227	25.3667	0	Group 1	227	90.5	0	Group 1									226	65.1667	0	Group 2	226	51.3	0	Group 1	226	133.333	0	Group 1	226	102.467	0	Group 2	226	113.96666666666667	0	Group 1	226	72.2	0	Group 2
227	36.03333333333333	0	Group 1	228	36.0333	0	Group 1	228	35.46666666666667	0	Group 1									227	55.8	0	Group 2	227	57.56666666666667	0	Group 1	227	120.533	0	Group 1	227	93.4	0	Group 2	227	53.233333333333334	0	Group 1	227	105.76666666666667	1	Group 2
228	2.2666666666666666	0	Group 1	229	2.26667	0	Group 1	229	36.666666666666664	0	Group 1									228	31	0	Group 2	228	60.7	0	Group 1	228	90.5	0	Group 1	228	98.1	0	Group 2	228	93.13333333333334	0	Group 1	228	61.833333333333336	1	Group 2
229	5	0	Group 1	230	5	0	Group 1	230	51.96666666666667	0	Group 1									229	3.03333	0	Group 2	229	51.46666666666667	0	Group 1	229	35.6667	0	Group 1	229	96.1333	0	Group 2	229	100.86666666666666	0	Group 1	229	59.96666666666667	0	Group 2
230	110.63333333333334	0	Group 1	231	110.633	0	Group 1	231	147.96666666666667	0	Group 1									230	41.9333	0	Group 2	230	36.93333333333333	0	Group 1	230	23.3333	0	Group 1	230	123.6	0	Group 2	230	128.3	0	Group 1	230	33.833333333333336	0	Group 2
231	92.86666666666666	0	Group 1	232	92.8667	0	Group 1	232	48	0	Group 1									231	27.8333	1	Group 2	231	122.53333333333333	0	Group 1	231	57.7	0	Group 1	231	93.2333	0	Group 2	231	31.866666666666667	0	Group 1	231	5.233333333333333	0	Group 2
232	72.03333333333333	0	Group 1	233	72.0333	0	Group 1	233	111.96666666666667	0	Group 1									232	72.9667	0	Group 2	232	147.56666666666666	0	Group 1	232	111.033	0	Group 1	232	35	0	Group 2	232	85.53333333333333	0	Group 1	232	179.3	0	Group 2
233	75.3	0	Group 1	234	75.3	0	Group 1	234	76.3	0	Group 1									233	113.233	0	Group 2	233	143.63333333333333	0	Group 1	233	49.8	0	Group 1	233	43.9333	0	Group 2	233	1.9	0	Group 1	233	5.3	0	Group 2
234	119.2	0	Group 1	235	119.2	0	Group 1	235	12.9	0	Group 1									234	67.6	1	Group 2	234	52.733333333333334	0	Group 1	234	35.5667	0	Group 1	234	145.267	0	Group 2	234	27.033333333333335	0	Group 1	234	1.6333333333333333	0	Group 2
235	111.06666666666666	0	Group 1	236	111.067	0	Group 1	236	118.96666666666667	0	Group 1									235	33.9	0	Group 2	235	121.36666666666666	0	Group 1	235	107.5	0	Group 1	235	60.2667	0	Group 2	235	25.933333333333334	0	Group 1	235	43.86666666666667	1	Group 2
236	34.06666666666667	0	Group 1	237	34.0667	0	Group 1	237	36.86666666666667	0	Group 1									236	57.6667	1	Group 2	236	48.9	0	Group 1	236	14.0667	0	Group 1	236	29.6333	0	Group 2	236	14.9	0	Group 1	236	49.96666666666667	0	Group 2
237	141.83333333333334	0	Group 1	238	141.833	0	Group 1	238	152.86666666666667	0	Group 1									237	107.933	0	Group 2	237	104.13333333333334	0	Group 1	237	94.0333	0	Group 1	237	11.2667	0	Group 2	237	59.96666666666667	0	Group 1	237	117.96666666666667	0	Group 2
238	17.866666666666667	0	Group 1	239	17.8667	0	Group 1	239	97.93333333333334	0	Group 1									238	96.5333	0	Group 2	238	118.53333333333333	0	Group 1	238	121.7	0	Group 1	238	11.2	0	Group 2	238	33.8	0	Group 1	238	92.83333333333333	0	Group 2
239	38.3	1	Group 1	240	38.3	1	Group 1	240	115.53333333333333	0	Group 1									239	99.1	0	Group 2	239	98.8	0	Group 1	239	117.333	0	Group 1	239	3.46667	0	Group 2	239	6.433333333333334	0	Group 1	239	83.16666666666667	0	Group 2
240	109.86666666666666	0	Group 1	241	109.867	0	Group 1	241	33.53333333333333	0	Group 1									240	122.467	0	Group 2	240	52.7	0	Group 1	240	95.6	0	Group 1	240	132.1	0	Group 2	240	36.56666666666667	0	Group 1	240	121.5	0	Group 2
241	108.46666666666667	0	Group 1	242	108.467	0	Group 1	242	92.63333333333334	0	Group 1									241	123.4	0	Group 2	241	60.63333333333333	0	Group 1	241	57.5	0	Group 1	241	89.3667	0	Group 2	241	59.6	0	Group 1	241	68.1	0	Group 2
242	98.7	0	Group 1	243	98.7	0	Group 1	243	102.76666666666667	0	Group 1									242	123.833	0	Group 2	242	129.2	0	Group 1	242	145.467	0	Group 1	242	2.93333	0	Group 2	242	29.733333333333334	0	Group 1	242	29.166666666666668	0	Group 2
243	24.733333333333334	0	Group 1	244	24.7333	0	Group 1	244	60.166666666666664	0	Group 1									243	30.0667	0	Group 2	243	51.5	0	Group 1	243	34	0	Group 1	243	168.767	0	Group 2	243	73.33333333333333	0	Group 1	243	122.3	0	Group 2
244	1.8666666666666667	0	Group 1	245	1.86667	0	Group 1	245	169	0	Group 1									244	3.03333	0	Group 2	244	99.93333333333334	0	Group 1	244	96.3333	0	Group 1	244	4.63333	0	Group 2	244	95.46666666666667	0	Group 1	244	151.2	0	Group 2
245	104.76666666666667	0	Group 1	246	104.767	0	Group 1	246	130.5	0	Group 1									245	5.73333	0	Group 2	245	97.43333333333334	0	Group 1	245	36.8667	0	Group 1	245	36.4333	0	Group 2	245	64.2	0	Group 1	245	26.566666666666666	1	Group 2
246	11.833333333333334	0	Group 1	247	11.8333	0	Group 1	247	96.3	0	Group 1									246	76.9333	0	Group 2	246	57.13333333333333	0	Group 1	246	158.233	0	Group 1	246	148.567	0	Group 2	246	12.1	0	Group 1	246	22.8	1	Group 2
247	12.6	0	Group 1	248	12.6	0	Group 1	248	69.23333333333333	0	Group 1									247	44	0	Group 2	247	25.333333333333332	0	Group 1	247	84.9333	0	Group 1	247	43.2	0	Group 2	247	33.93333333333333	1	Group 1	247	96.03333333333333	0	Group 2
248	48.9	0	Group 1	249	48.9	0	Group 1	249	12.333333333333334	0	Group 1									248	107.3	0	Group 2	248	6.733333333333333	0	Group 1	248	74.7	0	Group 1	248	35.4667	0	Group 2	248	3.3333333333333335	0	Group 1	248	23.933333333333334	1	Group 2
249	117.36666666666666	0	Group 1	250	117.367	0	Group 1	250	158.23333333333332	0	Group 1									249	51.8	0	Group 2	249	133.3	0	Group 1	249	97.9333	0	Group 1	249	70.8	0	Group 2	249	66.13333333333334	0	Group 1	249	4.933333333333334	0	Group 2
250	60.63333333333333	0	Group 1	251	60.6333	0	Group 1	251	0.7666666666666667	0	Group 1									250	56.4667	0	Group 2	250	60.233333333333334	1	Group 1	250	75.8333	0	Group 1	250	48.5667	0	Group 2	250	10	0	Group 1	250	5.866666666666666	0	Group 2
251	72.13333333333334	0	Group 1	252	72.1333	0	Group 1	252	111.83333333333333	0	Group 1									251	35.9667	0	Group 2	251	30.233333333333334	0	Group 1	251	85.2	0	Group 1	251	75.9	0	Group 2	251	36.63333333333333	0	Group 1	251	36.13333333333333	0	Group 2
252	52.833333333333336	0	Group 1	253	52.8333	0	Group 1	253	6.066666666666666	0	Group 1									252	67.7667	0	Group 2	252	58.7	0	Group 1	252	52.1667	0	Group 1	252	30.3	0	Group 2	252	35.43333333333333	0	Group 1	252	20.633333333333333	1	Group 2
253	58.7	0	Group 1	254	58.7	0	Group 1	254	96.3	0	Group 1									253	11	0	Group 2	253	35.63333333333333	0	Group 1	253	15.5	0	Group 1	253	56.5333	0	Group 2	253	36.53333333333333	0	Group 1	253	14.033333333333333	0	Group 2
254	45.5	0	Group 1	255	45.5	0	Group 1	255	31.866666666666667	0	Group 1									254	128.667	0	Group 2	254	49.4	0	Group 1	254	124.533	0	Group 1	254	85.2333	0	Group 2	254	25.033333333333335	0	Group 1	254	102.8	0	Group 2
255	29.866666666666667	0	Group 2	256	29.8667	0	Group 2	256	118.33333333333333	0	Group 1									255	12.2333	0	Group 2	255	134.96666666666667	0	Group 1	255	24.1	0	Group 1	255	66.0333	0	Group 2	255	29.833333333333332	0	Group 1	255	110.93333333333334	0	Group 2
256	34.3	0	Group 2	257	34.3	0	Group 2	257	58.8	0	Group 1									256	12.5333	0	Group 2	256	37.3	0	Group 1	256	73	0	Group 1	256	91.8	0	Group 2	256	38.166666666666664	0	Group 1	256	70.66666666666667	0	Group 2
257	63.5	0	Group 2	258	63.5	0	Group 2	258	91	0	Group 1									257	72.7667	0	Group 2	257	119.2	0	Group 1	257	33.8	0	Group 1	257	61.1	1	Group 2	257	37.56666666666667	0	Group 1	257	16.3	0	Group 2
258	60.166666666666664	0	Group 2	259	60.1667	0	Group 2	259	10	0	Group 1									258	5.96667	0	Group 2	258	36.233333333333334	0	Group 1	258	4	0	Group 1	258	32.4333	0	Group 2	258	74.46666666666667	0	Group 1	258	75.96666666666667	1	Group 2
259	5.833333333333333	0	Group 2	260	5.83333	0	Group 2	260	166.36666666666667	0	Group 1									259	52.8	0	Group 2	259	5.2	0	Group 1	259	36.5333	0	Group 1	259	59.4667	0	Group 2	259	65.53333333333333	0	Group 1	259	41.53333333333333	1	Group 2
260	54.266666666666666	0	Group 2	261	54.2667	0	Group 2	261	57.63333333333333	0	Group 1									260	10.8	0	Group 2	260	84.63333333333334	0	Group 1	260	56.6	0	Group 1	260	121.6	0	Group 2	260	2.1333333333333333	0	Group 1	260	75.73333333333333	0	Group 2
261	118.53333333333333	0	Group 2	262	118.533	0	Group 2	262	49.233333333333334	0	Group 1									261	72.4	0	Group 2	261	133.26666666666668	0	Group 1	261	38.5333	0	Group 1	261	25.7	0	Group 2	261	57.86666666666667	0	Group 1	261	93	1	Group 2
262	113.6	0	Group 2	263	113.6	0	Group 2	263	73.53333333333333	0	Group 1									262	28.2	0	Group 2	262	60.4	0	Group 1	262	83.7667	0	Group 1	262	59.6667	0	Group 2	262	27.5	0	Group 1	262	59.666666666666664	0	Group 2
263	56.13333333333333	0	Group 2	264	56.1333	0	Group 2	264	72.63333333333334	0	Group 1									263	104.333	0	Group 2	263	92.13333333333334	0	Group 1	263	6.36667	0	Group 1	263	4.7	0	Group 2	263	25.7	0	Group 1	263	24.233333333333334	0	Group 2
264	98.73333333333333	0	Group 2	265	98.7333	0	Group 2	265	26.966666666666665	0	Group 1									264	79.5	0	Group 2	264	89.7	0	Group 1	264	30.7667	0	Group 1	264	50.5667	0	Group 2	264	88.53333333333333	0	Group 1	264	102.43333333333334	0	Group 2
265	113.96666666666667	0	Group 2	266	113.967	0	Group 2	266	57.333333333333336	0	Group 1									265	59.3	0	Group 2	265	34.13333333333333	0	Group 1	265	28.7	0	Group 1	265	30.2667	0	Group 2	265	37.3	0	Group 1	265	114.5	0	Group 2
266	89.7	0	Group 2	267	89.7	0	Group 2	267	32.96666666666667	0	Group 1									266	48.4667	0	Group 2	266	155.96666666666667	0	Group 1	266	27.8	0	Group 1	266	68.7	0	Group 2	266	97.03333333333333	0	Group 1	266	92.83333333333333	0	Group 2
267	37.3	0	Group 2	268	37.3	0	Group 2	268	95.06666666666666	0	Group 1									267	84.4667	0	Group 2	267	93.86666666666666	0	Group 1	267	44.0667	0	Group 1	267	85.0667	1	Group 2	267	5.666666666666667	0	Group 1	267	56.733333333333334	1	Group 2
268	28.166666666666668	0	Group 2	269	28.1667	0	Group 2	269	55.8	0	Group 1									268	50.5	0	Group 2	268	25.5	0	Group 1	268	0.733333	0	Group 1	268	3.23333	0	Group 2	268	83.1	0	Group 1	268	14.666666666666666	0	Group 2
269	115.86666666666666	0	Group 2	270	115.867	0	Group 2	270	3.1	0	Group 1									269	10.2	0	Group 2	269	125.26666666666667	0	Group 1	269	59.3333	0	Group 1	269	28.3667	0	Group 2	269	31.633333333333333	0	Group 1	269	95.83333333333333	0	Group 2
270	111.36666666666666	0	Group 2	271	111.367	0	Group 2	271	126.63333333333334	0	Group 1									270	87.4667	0	Group 2	270	79.3	0	Group 1	270	36.8667	0	Group 1	270	78.4333	0	Group 2	270	51.3	0	Group 1	270	107.56666666666666	0	Group 2
271	76.36666666666666	0	Group 2	272	76.3667	0	Group 2	272	5.4	0	Group 1									271	4.4	0	Group 2	271	143.93333333333334	0	Group 1	271	0.133333	0	Group 1	271	13.5	0	Group 2	271	57.56666666666667	0	Group 1	271	71.53333333333333	1	Group 2
272	52.46666666666667	0	Group 2	273	52.4667	0	Group 2	273	47.53333333333333	0	Group 1									272	57.7	0	Group 2	272	25.366666666666667	0	Group 1	272	33.3333	0	Group 1	272	15.2	0	Group 2	272	105.76666666666667	0	Group 1	272	49.3	0	Group 2
273	93.86666666666666	0	Group 2	274	93.8667	0	Group 2	274	131.83333333333334	0	Group 1									273	81.5333	0	Group 2	273	72.76666666666667	0	Group 1	273	26.9	0	Group 1	273	61.3667	0	Group 2	273	60.7	0	Group 1	273	109.1	0	Group 2
274	116.13333333333334	0	Group 2	275	116.133	0	Group 2	275	25.066666666666666	0	Group 1									274	37.6	0	Group 2	274	70.7	0	Group 1	274	53.8667	0	Group 1	274	76.8	0	Group 2	274	90.16666666666667	0	Group 1	274	3.966666666666667	0	Group 2
275	3.033333333333333	0	Group 2	276	3.03333	0	Group 2	276	156.86666666666667	0	Group 1									275	95.1	0	Group 2	275	114.33333333333333	0	Group 1	275	79.5333	0	Group 1	275	3.43333	0	Group 2	275	51.46666666666667	0	Group 1	275	60.7	1	Group 2
276	122.73333333333333	0	Group 2	277	122.733	0	Group 2	277	123.43333333333334	1	Group 1									276	18.2	0	Group 2	276	112.73333333333333	0	Group 1	276	33.9667	0	Group 1	276	35.3667	0	Group 2	276	36.93333333333333	0	Group 1	276	55.56666666666667	0	Group 2
277	3.066666666666667	0	Group 2	278	3.06667	0	Group 2	278	51.4	0	Group 1									277	109.633	0	Group 2	277	67.4	0	Group 1	277	37.8667	0	Group 1	277	9.73333	0	Group 2	277	122.53333333333333	0	Group 1	277	22.933333333333334	1	Group 2
278	5.166666666666667	0	Group 2	279	5.16667	0	Group 2	279	31.5	0	Group 1									278	9.56667	0	Group 2	278	39.333333333333336	0	Group 1	278	61.5	0	Group 1	278	108.533	0	Group 2	278	147.56666666666666	0	Group 1	278	3.1	0	Group 2
279	37.166666666666664	0	Group 2	280	37.1667	0	Group 2	280	60.7	0	Group 1									279	134.633	0	Group 2	279	36.4	0	Group 1	279	69.6667	0	Group 1	279	118.767	0	Group 2	279	143.63333333333333	0	Group 1	279	14.2	0	Group 2
280	62.36666666666667	0	Group 2	281	62.3667	0	Group 2	281	125.5	0	Group 1									280	86.6	0	Group 2	280	61.13333333333333	1	Group 1	280	108.967	0	Group 1	280	67.7333	1	Group 2	280	52.733333333333334	0	Group 1	280	58.166666666666664	0	Group 2
281	111.76666666666667	0	Group 2	282	111.767	0	Group 2	282	65.9	0	Group 1									281	101.767	0	Group 2	281	95.93333333333334	0	Group 1	281	101.033	0	Group 1	281	13.2	0	Group 2	281	6.733333333333333	0	Group 1	281	60.5	0	Group 2
282	36.233333333333334	0	Group 2	283	36.2333	0	Group 2	283	25.466666666666665	0	Group 1									282	15.0333	0	Group 2	282	185.6	0	Group 1	282	133	0	Group 1	282	10.9333	0	Group 2	282	121.36666666666666	0	Group 1	282	125.9	0	Group 2
283	55.03333333333333	0	Group 2	284	55.0333	0	Group 2	284	3.2666666666666666	0	Group 1									283	43.1667	0	Group 2	283	133.3	0	Group 1	283	8.63333	0	Group 1	283	133.767	0	Group 2	283	48.9	0	Group 1	283	76.2	0	Group 2
284	10	0	Group 2	285	10	0	Group 2	285	155.13333333333333	0	Group 1									284	104.567	0	Group 2	284	36.9	0	Group 1	284	37.3333	0	Group 1	284	31.0333	0	Group 2	284	104.13333333333334	0	Group 1	284	100.53333333333333	0	Group 2
285	72.76666666666667	0	Group 2	286	72.7667	0	Group 2	286	101.26666666666667	0	Group 1									285	46.5333	0	Group 2	285	49.13333333333333	0	Group 1	285	59.2667	0	Group 1	285	20.5667	1	Group 2	285	118.53333333333333	0	Group 1	285	88.83333333333333	0	Group 2
286	52.93333333333333	0	Group 2	287	52.9333	0	Group 2	287	121.2	0	Group 1									286	31.9667	0	Group 2	286	87.53333333333333	0	Group 1	286	36.6667	0	Group 1	286	36.2667	0	Group 2	286	98.8	0	Group 1	286	100.63333333333334	0	Group 2
287	91.46666666666667	0	Group 2	288	91.4667	0	Group 2	288	138.9	0	Group 1									287	7.43333	0	Group 2	287	88.06666666666666	0	Group 1	287	72.3	0	Group 1	287	71.2	0	Group 2	287	90.63333333333334	0	Group 1	287	13.933333333333334	1	Group 2
288	4.933333333333334	0	Group 2	289	4.93333	0	Group 2	289	154.26666666666668	0	Group 1									288	60.8	0	Group 2	288	63.5	0	Group 1	288	138.7	0	Group 1	288	10.0333	0	Group 2	288	52.7	0	Group 1	288	97.26666666666667	0	Group 2
289	6.566666666666666	0	Group 2	290	6.56667	0	Group 2	290	181.3	0	Group 1									289	24.1667	1	Group 2	289	54.266666666666666	0	Group 1	289	100.767	1	Group 1	289	111.7	1	Group 2	289	60.63333333333333	0	Group 1	289	36.6	1	Group 2
290	12.233333333333333	0	Group 2	291	12.2333	0	Group 2	291	3.2666666666666666	0	Group 1									290	120.933	0	Group 2	290	131.8	0	Group 1	290	134.333	0	Group 1	290	68.2667	0	Group 2	290	129.2	0	Group 1	290	86.3	0	Group 2
291	138.76666666666668	0	Group 2	292	138.767	0	Group 2	292	116.6	0	Group 1									291	61.6	0	Group 2	291	108.73333333333333	0	Group 1	291	100.367	0	Group 1	291	88.4333	0	Group 2	291	51.5	0	Group 1	291	13.633333333333333	1	Group 2
292	91.66666666666667	0	Group 2	293	91.6667	0	Group 2	293	33.96666666666667	0	Group 1									292	77.9	0	Group 2	292	84.23333333333333	0	Group 1	292	35.8333	0	Group 1	292	51.6	0	Group 2	292	99.93333333333334	0	Group 1	292	17.5	1	Group 2
293	14.766666666666667	0	Group 2	294	14.7667	0	Group 2	294	79.4	0	Group 1									293	37.9667	0	Group 2	293	47.166666666666664	0	Group 1	293	26.4667	0	Group 1	293	12.0667	0	Group 2	293	55.06666666666667	0	Group 1	293	130.03333333333333	0	Group 2
294	87.53333333333333	0	Group 2	295	87.5333	0	Group 2	295	109.4	0	Group 1									294	84.3667	0	Group 2	294	41.733333333333334	0	Group 1	294	57.6333	0	Group 1	294	9.16667	0	Group 2	294	97.43333333333334	0	Group 1	294	128.93333333333334	0	Group 2
295	35.1	1	Group 2	296	35.1	1	Group 2	296	16.1	0	Group 1									295	13.2	0	Group 2	295	50.1	0	Group 1	295	145.633	0	Group 1	295	62.3	0	Group 2	295	59.8	0	Group 1	295	29.566666666666666	0	Group 2
296	157.76666666666668	0	Group 2	297	157.767	0	Group 2	297	52.53333333333333	0	Group 1									296	41.1667	0	Group 2	296	32.233333333333334	0	Group 1	296	107.8	0	Group 1	296	90.1667	0	Group 2	296	57.13333333333333	0	Group 1	296	56.56666666666667	0	Group 2
297	55.93333333333333	0	Group 2	298	55.9333	0	Group 2	298	5.333333333333333	0	Group 1									297	3.03333	0	Group 2	297	144.46666666666667	0	Group 1	297	46.3	0	Group 1	297	13.1667	0	Group 2	297	25.333333333333332	0	Group 1	297	5.7	0	Group 2
298	3.8	0	Group 2	299	3.8	0	Group 2	299	11.133333333333333	0	Group 1									298	35.1	1	Group 2	298	24.733333333333334	0	Group 1	298	113.867	0	Group 1	298	91.0667	0	Group 2	298	6.733333333333333	0	Group 1	298	106.86666666666666	0	Group 2
299	56.46666666666667	0	Group 2	300	56.4667	0	Group 2	300	54	0	Group 1									299	18.2667	0	Group 2	299	72.13333333333334	0	Group 1	299	3.03333	0	Group 1	299	3.33333	0	Group 2	299	133.3	0	Group 1	299	70.9	0	Group 2
300	73.96666666666667	0	Group 2	301	73.9667	0	Group 2	301	95.2	0	Group 1									300	85.8667	0	Group 2	300	52	0	Group 1	300	99.3	0	Group 1	300	71.2	0	Group 2	300	60.166666666666664	0	Group 1	300	108.4	0	Group 2
301	11.166666666666666	0	Group 2	302	11.1667	0	Group 2	302	79.43333333333334	0	Group 1									301	116.833	0	Group 2	301	54.7	0	Group 1	301	36.6333	0	Group 1	301	91.2333	0	Group 2	301	60.233333333333334	1	Group 1	301	2.6	0	Group 2
302	123.4	0	Group 2	303	123.4	0	Group 2	303	31.933333333333334	0	Group 1									302	97.9333	0	Group 2	302	143.33333333333334	0	Group 1	302	31.8	0	Group 1	302	8.03333	0	Group 2	302	30.233333333333334	0	Group 1	302	102.8	0	Group 2
303	9.6	0	Group 2	304	9.6	0	Group 2	304	9.366666666666667	0	Group 1									303	3.16667	0	Group 2	303	47	0	Group 1	303	56.9667	0	Group 1	303	133.1	0	Group 2	303	58.7	0	Group 1	303	166.3	0	Group 2
304	151.33333333333334	0	Group 2	305	151.333	0	Group 2	305	5.033333333333333	0	Group 2									304	71.5667	0	Group 2	304	113.7	0	Group 1	304	172.167	0	Group 1	304	61.1	0	Group 2	304	51.56666666666667	0	Group 1	304	87.53333333333333	0	Group 2
305	80.7	0	Group 2	306	80.7	0	Group 2	306	17.166666666666668	0	Group 2									305	29.2667	0	Group 2	305	2.2666666666666666	0	Group 1	305	76.3	0	Group 1	305	50.1	0	Group 2	305	36.4	0	Group 1	305	59.46666666666667	0	Group 2
306	83.93333333333334	0	Group 2	307	83.9333	0	Group 2	307	40.7	1	Group 2									306	51.0667	0	Group 2	306	57.266666666666666	0	Group 1	306	169	0	Group 1	306	85.6	0	Group 2	306	35.63333333333333	0	Group 1	306	60.166666666666664	1	Group 2
307	40.333333333333336	0	Group 2	308	40.3333	0	Group 2	308	27.733333333333334	0	Group 2									307	66.1667	0	Group 2	307	64.6	0	Group 1	307	79.4	0	Group 1	307	28.5667	0	Group 2	307	84.96666666666667	0	Group 1	307	45.5	1	Group 2
308	41.93333333333333	0	Group 2	309	41.9333	0	Group 2	309	9.066666666666666	0	Group 2									308	11	0	Group 2	308	63.43333333333333	0	Group 1	308	181.3	0	Group 1	308	145.633	0	Group 2	308	49.4	0	Group 1	308	66.76666666666667	1	Group 2
309	37.266666666666666	0	Group 2	310	37.2667	0	Group 2	310	34.3	0	Group 2									309	111.767	0	Group 2	309	111.26666666666667	0	Group 1	309	59.9667	0	Group 1	309	26.2	0	Group 2	309	4	0	Group 1	309	2.6666666666666665	0	Group 2
310	59.46666666666667	0	Group 2	311	59.4667	0	Group 2	311	15.4	0	Group 2									310	76.9667	0	Group 2	310	87.9	0	Group 1	310	0.766667	0	Group 1	310	10.1333	0	Group 2	310	134.96666666666667	0	Group 1	310	65.86666666666666	1	Group 2
311	112	0	Group 2	312	112	0	Group 2	312	52.3	0	Group 2									311	80.2333	0	Group 2	311	71.83333333333333	0	Group 1	311	121.667	0	Group 1	311	88.9333	0	Group 2	311	37.3	0	Group 1	311	146.8	0	Group 2
312	71.2	0	Group 2	313	71.2	0	Group 2	313	3.2666666666666666	0	Group 2									312	45.3	0	Group 2	312	108.4	0	Group 1	312	35.5667	0	Group 1	312	81.4667	1	Group 2	312	119.2	0	Group 1	312	24.5	1	Group 2
313	3.7666666666666666	0	Group 2	314	3.76667	0	Group 2	314	3.533333333333333	0	Group 2									313	129.333	0	Group 2	313	24.2	0	Group 1	313	111.833	0	Group 1	313	3.73333	0	Group 2	313	36.233333333333334	0	Group 1	313	24.333333333333332	1	Group 2
314	8.6	0	Group 2	315	8.6	0	Group 2	315	25.266666666666666	0	Group 2									314	91.9	0	Group 2	314	121.93333333333334	0	Group 1	314	34.7667	0	Group 1	314	102	0	Group 2	314	5.2	0	Group 1	314	101.33333333333333	1	Group 2
315	1.2	0	Group 2	316	1.2	0	Group 2	316	126.9	0	Group 2									315	76.3667	0	Group 2	315	109.86666666666666	0	Group 1	315	73.0667	0	Group 1	315	84.5	0	Group 2	315	84.63333333333334	0	Group 1	315	40.63333333333333	1	Group 2
316	7.733333333333333	0	Group 2	317	7.73333	0	Group 2	317	92.9	0	Group 2									316	3	0	Group 2	316	60.166666666666664	0	Group 1	316	58.1	0	Group 1	316	4.26667	0	Group 2	316	133.26666666666668	0	Group 1	316	21.7	1	Group 2
317	27	0	Group 2	318	27	0	Group 2	318	61.36666666666667	0	Group 2									317	103.4	0	Group 2	317	68	1	Group 1	317	127.133	0	Group 1	317	7.13333	0	Group 2	317	60.4	0	Group 1	317	16.7	1	Group 2
318	131.9	0	Group 2	319	131.9	0	Group 2	319	8.933333333333334	0	Group 2									318	75.9	0	Group 2	318	162.46666666666667	0	Group 1	318	32.9	0	Group 1	318	121.633	0	Group 2	318	92.13333333333334	0	Group 1
319	36.63333333333333	0	Group 2	320	36.6333	0	Group 2	320	120.43333333333334	0	Group 2									319	4.36667	0	Group 2	319	111.86666666666666	0	Group 1	319	71.4667	0	Group 1	319	100.133	0	Group 2	319	89.7	0	Group 1
320	57.96666666666667	0	Group 2	321	57.9667	0	Group 2	321	59.2	0	Group 2									320	162.533	0	Group 2	320	173.2	0	Group 1	320	72.1667	0	Group 1	320	124.8	0	Group 2	320	34.13333333333333	0	Group 1
321	113.63333333333334	0	Group 2	322	113.633	0	Group 2	322	108.7	0	Group 2									321	142.3	0	Group 2	321	73.96666666666667	0	Group 1	321	47.5333	0	Group 1	321	11.4333	0	Group 2	321	155.96666666666667	0	Group 1
322	11	0	Group 2	323	11	0	Group 2	323	103.66666666666667	0	Group 2									322	90.9667	1	Group 2	322	131.43333333333334	0	Group 1	322	118.9	0	Group 1	322	17.8	0	Group 2	322	95.6	0	Group 1
323	47	0	Group 2	324	47	0	Group 2	324	63.7	1	Group 2									323	50.3	0	Group 2	323	45.833333333333336	0	Group 1	323	125.5	0	Group 1	323	5.6	0	Group 2	323	93.86666666666666	0	Group 1
324	84.36666666666666	0	Group 2	325	84.3667	0	Group 2	325	37.03333333333333	0	Group 2									324	11.6333	0	Group 2	324	156.66666666666666	0	Group 2	324	38	0	Group 1	324	133.767	0	Group 2	324	9.1	0	Group 1
325	36.96666666666667	0	Group 2	326	36.9667	0	Group 2	326	80.16666666666667	0	Group 2									325	12.8667	0	Group 2	325	45.5	0	Group 2	325	107.867	0	Group 1	325	5.56667	0	Group 2	325	25.5	0	Group 1
326	120.9	0	Group 2	327	120.9	0	Group 2	327	128.6	0	Group 2									326	48.4	0	Group 2	326	131.9	0	Group 2	326	9.8	0	Group 1	326	10.9667	0	Group 2	326	125.26666666666667	0	Group 1
327	15.833333333333334	0	Group 2	328	15.8333	0	Group 2	328	54.333333333333336	0	Group 2									327	5.83333	0	Group 2	327	5.166666666666667	0	Group 2	327	118.967	0	Group 1	327	4.7	0	Group 2	327	79.3	0	Group 1
328	48.733333333333334	0	Group 2	329	48.7333	0	Group 2	329	158.16666666666666	0	Group 2									328	53.2	0	Group 2	328	111.7	0	Group 2	328	82.1333	0	Group 1	328	29.8667	0	Group 2	328	3.9	0	Group 1
329	98.33333333333333	0	Group 2	330	98.3333	0	Group 2	330	123.9	0	Group 2									329	48.7333	0	Group 2	329	1.2	0	Group 2	329	16.1	0	Group 1	329	127.6	0	Group 2	329	53.86666666666667	0	Group 1
330	12.8	0	Group 2	331	12.8	0	Group 2	331	56.7	0	Group 2									330	91.4667	0	Group 2	330	135.8	0	Group 2	330	70.5667	0	Group 1	330	6.06667	0	Group 2	330	11.166666666666666	0	Group 1
331	71.56666666666666	0	Group 2	332	71.5667	0	Group 2	332	107.76666666666667	1	Group 2									331	36.6333	0	Group 2	331	88.66666666666667	0	Group 2	331	25.0667	0	Group 1	331	61.5667	0	Group 2	331	143.93333333333334	0	Group 1
332	59.43333333333333	0	Group 2	333	59.4333	0	Group 2	333	85.2	0	Group 2									332	12.6333	0	Group 2	332	121.96666666666667	0	Group 2	332	115.133	0	Group 1	332	73.0333	0	Group 2	332	25.366666666666667	0	Group 1
333	124.33333333333333	0	Group 2	334	124.333	0	Group 2	334	3.2333333333333334	0	Group 2									333	11.4333	0	Group 2	333	111.06666666666666	0	Group 2	333	52.3	0	Group 1	333	3.83333	0	Group 2	333	72.76666666666667	0	Group 1
334	108.5	0	Group 2	335	108.5	0	Group 2	335	4.566666666666666	0	Group 2									334	60.8	0	Group 2	334	72.53333333333333	0	Group 2	334	97.4	0	Group 1	334	180.033	0	Group 2	334	70.7	0	Group 1
335	134.7	0	Group 2	336	134.7	0	Group 2	336	122.16666666666667	0	Group 2									335	67.6	0	Group 2	335	12.933333333333334	0	Group 2	335	48	0	Group 1	335	31.7667	0	Group 2	335	96.13333333333334	0	Group 1
336	5.233333333333333	0	Group 2	337	5.23333	0	Group 2	337	135.13333333333333	0	Group 2									336	3.36667	0	Group 2	336	98.73333333333333	0	Group 2	336	51.4	0	Group 1	336	112.233	0	Group 2	336	70.13333333333334	0	Group 1
337	182.5	0	Group 2	338	182.5	0	Group 2	338	4.5	0	Group 2									337	10.5	0	Group 2	337	80.7	0	Group 2	337	80.7	0	Group 1	337	38.6667	0	Group 2	337	42.2	0	Group 1
338	112.96666666666667	0	Group 2	339	112.967	0	Group 2	339	61.8	1	Group 2									338	96.1667	0	Group 2	338	38.3	1	Group 2	338	12.7667	0	Group 1	338	83.9667	0	Group 2	338	114.33333333333333	0	Group 1
339	27.833333333333332	1	Group 2	340	27.8333	1	Group 2	340	12	0	Group 2									339	112.867	0	Group 2	339	125	0	Group 2	339	105	0	Group 1	339	6.83333	0	Group 2	339	112.73333333333333	0	Group 1
340	126.7	0	Group 2	341	126.7	0	Group 2	341	35.9	0	Group 2									340	3.76667	0	Group 2	340	33.8	0	Group 2	340	188.8	0	Group 1	340	59.6667	0	Group 2	340	38.93333333333333	0	Group 1
341	72.4	0	Group 2	342	72.4	0	Group 2	342	93.1	1	Group 2									341	35.9	0	Group 2	341	100.76666666666667	0	Group 2	341	57.9333	0	Group 1	341	5.83333	0	Group 2	341	67.4	0	Group 1
342	75.2	0	Group 2	343	75.2	0	Group 2	343	25.5	0	Group 2									342	90.0333	0	Group 2	342	130.96666666666667	0	Group 2	342	126.1	0	Group 1	342	106.067	0	Group 2	342	32.833333333333336	0	Group 1
343	18.2	0	Group 2	344	18.2	0	Group 2	344	47.93333333333333	0	Group 2									343	103.533	0	Group 2	343	144.46666666666667	0	Group 2	343	155.133	0	Group 1	343	104.233	0	Group 2	343	39.333333333333336	0	Group 1
344	24.166666666666668	1	Group 2	345	24.1667	1	Group 2	345	28.433333333333334	0	Group 2									344	92.6667	0	Group 2	344	34.4	0	Group 2	344	35.1	0	Group 1	344	72.1	0	Group 2	344	12	0	Group 1
345	1.2	0	Group 2	346	1.2	0	Group 2	346	82.6	0	Group 2									345	5.53333	0	Group 2	345	75.2	0	Group 2	345	1.36667	0	Group 1	345	182	0	Group 2	345	36.4	0	Group 1
346	86.83333333333333	0	Group 2	347	86.8333	0	Group 2	347	3.033333333333333	0	Group 2									346	5.53333	0	Group 2	346	129.03333333333333	0	Group 2	346	39.3	0	Group 1	346	3.8	0	Group 2	346	61.13333333333333	1	Group 1
347	2.966666666666667	0	Group 2	348	2.96667	0	Group 2	348	33.03333333333333	0	Group 2									347	2.9	0	Group 2	347	157.46666666666667	0	Group 2	347	134.5	0	Group 1	347	50.0667	0	Group 2	347	60.2	0	Group 1
348	79.5	0	Group 2	349	79.5	0	Group 2	349	33.56666666666667	0	Group 2									348	27	0	Group 2	348	97.5	0	Group 2	348	147.967	0	Group 1	348	3.26667	0	Group 2	348	63.8	0	Group 1
349	116.53333333333333	0	Group 2	350	116.533	0	Group 2	350	59.3	0	Group 2									349	56.3333	0	Group 2	349	112	0	Group 2	349	3.23333	0	Group 1	349	116.9	0	Group 2	349	30.833333333333332	0	Group 1
350	122.33333333333333	0	Group 2	351	122.333	0	Group 2	351	9.8	0	Group 2									350	33.3333	0	Group 2	350	6.733333333333333	0	Group 2	350	123.9	0	Group 1	350	71.2667	1	Group 2	350	95.93333333333334	0	Group 1
351	48.46666666666667	0	Group 2	352	48.4667	0	Group 2	352	17.933333333333334	0	Group 2									351	96.7	0	Group 2	351	97.33333333333333	0	Group 2	351	123.433	1	Group 1	351	55.3	0	Group 2	351	1.8666666666666667	0	Group 1
352	12.933333333333334	0	Group 2	353	12.9333	0	Group 2	353	40.5	1	Group 2									352	53.6667	0	Group 2	352	63.2	0	Group 2	352	59.3667	0	Group 1	352	75.6333	0	Group 2	352	185.6	0	Group 1
353	10.8	0	Group 2	354	10.8	0	Group 2	354	106.66666666666667	0	Group 2									353	7.9	0	Group 2	353	41.56666666666667	0	Group 2	353	3.26667	0	Group 1	353	146.467	0	Group 2	353	133.3	0	Group 1
354	179.83333333333334	0	Group 2	355	179.833	0	Group 2	355	78.1	0	Group 2									354	100.533	0	Group 2	354	108.83333333333333	0	Group 2	354	32.9667	0	Group 1	354	37.9667	0	Group 2	354	40.56666666666667	0	Group 1
355	5.533333333333333	0	Group 2	356	5.53333	0	Group 2	356	136.06666666666666	0	Group 2									355	102.633	0	Group 2	355	100.1	0	Group 2	355	85.2	0	Group 1	355	69.6333	1	Group 2	355	36.9	0	Group 1
356	56.333333333333336	0	Group 2	357	56.3333	0	Group 2	357	11.7	0	Group 2									356	68.8667	0	Group 2	356	49.03333333333333	0	Group 2	356	3.26667	0	Group 1	356	108.467	0	Group 2	356	43.8	0	Group 1
357	71.83333333333333	0	Group 2	358	71.8333	0	Group 2	358	75.9	0	Group 2									357	22.0333	1	Group 2	357	1.7666666666666666	0	Group 2	357	72.5	0	Group 1	357	109.9	0	Group 2	357	49.13333333333333	0	Group 1
358	12.3	0	Group 2	359	12.3	0	Group 2	359	56.733333333333334	0	Group 2									358	28.2333	0	Group 2	358	55.1	1	Group 2	358	72.2667	0	Group 1	358	142.8	0	Group 2	358	87.53333333333333	0	Group 1
359	60.8	0	Group 2	360	60.8	0	Group 2	360	12.133333333333333	0	Group 2									359	59.6667	0	Group 2	359	166.03333333333333	1	Group 2	359	27.7667	0	Group 1	359	147.2	0	Group 2	359	88.06666666666666	0	Group 1
360	46.53333333333333	0	Group 2	361	46.5333	0	Group 2	361	127.63333333333334	0	Group 2									360	3.03333	0	Group 2	360	25.533333333333335	0	Group 2	360	73.5333	0	Group 1	360	4.5	0	Group 2	360	104.76666666666667	0	Group 1
361	5.666666666666667	0	Group 2	362	5.66667	0	Group 2	362	26.866666666666667	0	Group 2									361	98.3333	0	Group 2	361	55.2	0	Group 2	361	118.333	0	Group 1	361	49.8667	1	Group 2	361	34.06666666666667	0	Group 1
362	165.36666666666667	1	Group 2	363	165.367	1	Group 2	363	35.833333333333336	0	Group 2									362	36.4333	0	Group 2	362	176.86666666666667	0	Group 2	362	60.7	0	Group 1	362	47.4	0	Group 2	362	63.5	0	Group 1
363	18.266666666666666	0	Group 2	364	18.2667	0	Group 2	364	93.93333333333334	0	Group 2									363	33.5667	0	Group 2	363	31.366666666666667	0	Group 2	363	126.633	0	Group 1	363	5.53333	0	Group 2	363	54.266666666666666	0	Group 1
364	67.23333333333333	0	Group 2	365	67.2333	0	Group 2	365	73.73333333333333	0	Group 2									364	8.13333	0	Group 2	364	1.2	0	Group 2	364	105	0	Group 1	364	89.3667	1	Group 2	364	136.16666666666666	0	Group 1
365	10.2	0	Group 2	366	10.2	0	Group 2	366	71.83333333333333	1	Group 2									365	4.33333	0	Group 2	365	63.266666666666666	0	Group 2	365	38	0	Group 1	365	65.1	0	Group 2	365	131.8	0	Group 1
366	36.4	0	Group 2	367	36.4	0	Group 2	367	9.566666666666666	0	Group 2									366	94.2667	0	Group 2	366	52.6	0	Group 2	366	96.3	0	Group 1	366	72.5667	0	Group 2	366	6.2	0	Group 1
367	4.4	0	Group 2	368	4.4	0	Group 2	368	33.63333333333333	0	Group 2									367	95.3333	0	Group 2	367	36.4	0	Group 2	367	64.4333	0	Group 1	367	16.9333	1	Group 2	367	15.633333333333333	0	Group 1
368	81.53333333333333	0	Group 2	369	81.5333	0	Group 2	369	123.7	0	Group 2									368	7.03333	0	Group 2	368	4.933333333333334	0	Group 2	368	166.367	0	Group 1	368	42.7	1	Group 2	368	54.43333333333333	0	Group 1
369	12.866666666666667	0	Group 2	370	12.8667	0	Group 2	370	13.966666666666667	0	Group 2									369	53.2333	0	Group 2	369	12.933333333333334	0	Group 2	369	92.7333	0	Group 1	369	53.2667	1	Group 2	369	108.73333333333333	0	Group 1
370	25.533333333333335	0	Group 2	371	25.5333	0	Group 2	371	36.8	0	Group 2									370	75.3667	0	Group 2	370	37.7	0	Group 2	370	128.6	0	Group 1	370	129.533	1	Group 2	370	36.03333333333333	0	Group 1
371	103.53333333333333	0	Group 2	372	103.533	0	Group 2	372	4	0	Group 2									371	128.533	0	Group 2	371	182.66666666666666	0	Group 2	371	109.4	0	Group 1	371	118.033	0	Group 2	371	84.23333333333333	0	Group 1
372	14.433333333333334	0	Group 2	373	14.4333	0	Group 2	373	55.233333333333334	0	Group 2									372	155.667	0	Group 2	372	134.7	0	Group 2	372	180.2	0	Group 1	372	2.93333	0	Group 2	372	47.166666666666664	0	Group 1
373	31.966666666666665	0	Group 2	374	31.9667	0	Group 2	374	36.666666666666664	0	Group 2									373	12.3	0	Group 2	373	5.566666666666666	0	Group 2	373	101.533	0	Group 1	373	80.0333	0	Group 2	373	75.3	0	Group 1
374	11.566666666666666	0	Group 2	375	11.5667	0	Group 2	375	104.03333333333333	0	Group 2									374	3.96667	0	Group 2	374	62.166666666666664	0	Group 2	374	44.5	1	Group 1	374	33.3333	0	Group 2	374	92.86666666666666	0	Group 1
375	2.533333333333333	0	Group 2	376	2.53333	0	Group 2	376	97.33333333333333	0	Group 2									375	31.0333	1	Group 2	375	116.33333333333333	0	Group 2	375	31.9667	0	Group 1	375	54.8	0	Group 2	375	41.733333333333334	0	Group 1
376	96.16666666666667	0	Group 2	377	96.1667	0	Group 2	377	118.76666666666667	0	Group 2									376	3.73333	0	Group 2	376	111.36666666666666	0	Group 2	376	115.533	0	Group 1	376	92.1667	0	Group 2	376	50.1	0	Group 1
377	8.133333333333333	0	Group 2	378	8.13333	0	Group 2	378	121.63333333333334	0	Group 2									377	105.6	0	Group 2	377	35.733333333333334	0	Group 2	377	137.033	0	Group 1	377	19.9667	0	Group 2	377	81.56666666666666	0	Group 1
378	35.56666666666667	1	Group 2	379	35.5667	1	Group 2	379	55.63333333333333	0	Group 2									378	87.1	0	Group 2	378	39.9	0	Group 2	378	49.2333	0	Group 1	378	29.5667	0	Group 2	378	32.233333333333334	0	Group 1
379	53.233333333333334	0	Group 2	380	53.2333	0	Group 2	380	60.46666666666667	0	Group 2									379	5.7	0	Group 2	379	13.033333333333333	0	Group 2	379	25.4667	0	Group 1	379	83.4	1	Group 2	379	49.43333333333333	0	Group 1
380	7.033333333333333	0	Group 2	381	7.03333	0	Group 2	381	75.83333333333333	0	Group 2									380	100.567	0	Group 2	380	117.36666666666666	0	Group 2	380	54.0667	0	Group 1	380	178.8	0	Group 2	380	144.46666666666667	0	Group 1
381	52.833333333333336	0	Group 2	382	52.8333	0	Group 2	382	8.333333333333334	0	Group 2									381	129.233	0	Group 2	381	74.36666666666666	1	Group 2	381	92.6333	0	Group 2	381	91.9	0	Group 2	381	24.733333333333334	0	Group 1
382	62.166666666666664	0	Group 2	383	62.1667	0	Group 2	383	3.466666666666667	0	Group 2									382	86.9667	0	Group 2	382	141.83333333333334	0	Group 2	382	25.4667	0	Group 2	382	131.8	0	Group 2	382	72.13333333333334	0	Group 1
383	10	0	Group 2	384	10	0	Group 2	384	88.93333333333334	0	Group 2									383	51.5667	0	Group 2	383	138.76666666666668	0	Group 2	383	130.633	0	Group 2	383	171.733	0	Group 2	383	52	0	Group 1
384	50.9	0	Group 2	385	50.9	0	Group 2	385	51.6	0	Group 2									384	46.4	0	Group 2	384	57.166666666666664	0	Group 2	384	7.96667	0	Group 2	384	49.9	0	Group 2	384	54.7	0	Group 1
385	74.36666666666666	1	Group 2	386	74.3667	1	Group 2	386	32.166666666666664	0	Group 2									385	73.3	0	Group 2	385	159.33333333333334	0	Group 2	385	35.8333	0	Group 2	385	109.433	0	Group 2	385	143.33333333333334	0	Group 1
386	63.266666666666666	0	Group 2	387	63.2667	0	Group 2	387	134.26666666666668	0	Group 2									386	83.3667	0	Group 2	386	115.86666666666666	0	Group 2	386	115.233	0	Group 2	386	62.0667	0	Group 2	386	11.433333333333334	0	Group 1
387	4.366666666666666	0	Group 2	388	4.36667	0	Group 2	388	171.46666666666667	0	Group 2									387	35.9	0	Group 2	387	124.33333333333333	0	Group 2	387	4.56667	0	Group 2	387	136.867	0	Group 2	387	113.8	0	Group 1
388	73.3	0	Group 2	389	73.3	0	Group 2	389	88.43333333333334	0	Group 2									388	1.6	0	Group 2	388	133.33333333333334	0	Group 2	388	30.5667	0	Group 2	388	63.5	0	Group 2	388	3.8	0	Group 1
389	88.9	1	Group 2	390	88.9	1	Group 2	390	11.6	0	Group 2									389	13.8667	0	Group 2	389	2.533333333333333	0	Group 2	389	11.7	0	Group 2	389	73.3	0	Group 2	389	57.333333333333336	0	Group 1
390	5.7	0	Group 2	391	5.7	0	Group 2	391	68.56666666666666	0	Group 2									390	45.8333	1	Group 2	390	126.63333333333334	0	Group 2	390	102.767	0	Group 2	390	91	0	Group 2	390	47	0	Group 1
391	1.7666666666666666	0	Group 2	392	1.76667	0	Group 2	392	92.6	1	Group 2									391	122.8	0	Group 2	391	33.6	0	Group 2	391	59.3	1	Group 2	391	168.667	0	Group 2	391	113.7	0	Group 1
392	10.433333333333334	0	Group 2	393	10.4333	0	Group 2	393	69.43333333333334	0	Group 2									392	2	0	Group 2	392	110.63333333333334	0	Group 2	392	139.3	0	Group 2	392	37.9667	1	Group 2	392	2.2666666666666666	0	Group 1
393	44	0	Group 2	394	44	0	Group 2	394	59.36666666666667	0	Group 2									393	53.2667	1	Group 2	393	71.83333333333333	0	Group 2	393	60.1667	0	Group 2	393	112.867	0	Group 2	393	12.6	0	Group 1
394	99.86666666666666	0	Group 2	395	99.8667	0	Group 2	395	51.766666666666666	0	Group 2									394	10	0	Group 2	394	5.233333333333333	0	Group 2	394	6.06667	0	Group 2	394	5.26667	0	Group 2	394	5	0	Group 1
395	13.866666666666667	0	Group 2	396	13.8667	0	Group 2	396	15.166666666666666	0	Group 2									395	75.6667	0	Group 2	395	113.56666666666666	1	Group 2	395	122.167	0	Group 2	395	3.03333	0	Group 2	395	34.3	0	Group 1
396	1.6333333333333333	0	Group 2	397	1.63333	0	Group 2	397	70.2	0	Group 2									396	67.2333	0	Group 2	396	63.9	0	Group 2	396	3.56667	0	Group 2	396	95.6333	0	Group 2	396	64.6	0	Group 1
397	4.333333333333333	0	Group 2	398	4.33333	0	Group 2	398	158.96666666666667	0	Group 2									397	158.6	0	Group 2	397	6.833333333333333	0	Group 2	397	8.93333	0	Group 2	397	77.9333	0	Group 2	397	59.03333333333333	0	Group 1
398	63.96666666666667	0	Group 2	399	63.9667	0	Group 2	399	92.73333333333333	0	Group 2									398	97.4	0	Group 2	398	120.43333333333334	0	Group 2	398	101.267	0	Group 2	398	36.6	1	Group 2	398	63.43333333333333	0	Group 1
399	126.4	0	Group 2	400	126.4	0	Group 2	400	3.433333333333333	0	Group 2									399	99.8667	0	Group 2	399	123.03333333333333	0	Group 2	399	5.03333	0	Group 2	399	40.4333	0	Group 2	399	111.26666666666667	0	Group 1
400	2.1666666666666665	0	Group 2	401	2.16667	0	Group 2	401	37.766666666666666	0	Group 2									400	36.3	0	Group 2	400	97.86666666666666	0	Group 2	400	116.6	0	Group 2	400	117.267	0	Group 2	400	87.9	0	Group 1
401	84.46666666666667	0	Group 2	402	84.4667	0	Group 2	402	111.83333333333333	0	Group 2									401	122.333	0	Group 2	401	60.3	0	Group 2	401	13.2	0	Group 2	401	118.8	0	Group 2	401	26.033333333333335	0	Group 1
402	5.733333333333333	0	Group 2	403	5.73333	0	Group 2	403	82.86666666666666	0	Group 2									402	60.8667	1	Group 2	402	3.566666666666667	0	Group 2	402	87.8	0	Group 2	402	5.83333	0	Group 2	402	55.93333333333333	0	Group 1
403	116.83333333333333	0	Group 2	404	116.833	0	Group 2	404	2.8	0	Group 2									403	94.3	0	Group 2	403	2.966666666666667	0	Group 2	403	111.5	0	Group 2	403	73.3333	0	Group 2	403	71.83333333333333	0	Group 1
404	53.266666666666666	1	Group 2	405	53.2667	1	Group 2	405	27.333333333333332	0	Group 2									404	84.8	1	Group 2	404	33.93333333333333	0	Group 2	404	90.9667	0	Group 2	404	32	1	Group 2	404	101.33333333333333	0	Group 1
405	3.7333333333333334	0	Group 2	406	3.73333	0	Group 2	406	98.5	0	Group 2									405	3.8	0	Group 2	405	86.83333333333333	0	Group 2	405	127.633	0	Group 2	405	12.9667	1	Group 2	405	57.5	0	Group 1
406	71.5	0	Group 2	407	71.5	0	Group 2	407	4.533333333333333	0	Group 2									406	5.73333	0	Group 2	406	101.3	0	Group 2	406	154.267	0	Group 2	406	104.7	0	Group 2	406	35.7	0	Group 1
407	59.3	0	Group 2	408	59.3	0	Group 2	408	103.03333333333333	0	Group 2									407	10.0333	0	Group 2	407	48.833333333333336	1	Group 2	407	107.3	0	Group 2	407	58.2	0	Group 2	407	93.76666666666667	0	Group 1
408	142.3	0	Group 2	409	142.3	0	Group 2	409	10.933333333333334	0	Group 2									408	2.16667	0	Group 2	408	36	0	Group 2	408	15.1667	0	Group 2	408	144.633	0	Group 2	408	108.4	0	Group 1
409	35.733333333333334	0	Group 2	410	35.7333	0	Group 2	410	180.03333333333333	0	Group 2									409	95.8333	0	Group 2	409	165.36666666666667	1	Group 2	409	133.133	0	Group 2	409	81.2	0	Group 2	409	52.46666666666667	0	Group 1
410	96.36666666666666	0	Group 2	411	96.3667	0	Group 2	411	113.5	0	Group 2									410	70.4667	0	Group 2	410	45	0	Group 2	410	25.2667	0	Group 2	410	101.167	0	Group 2	410	24.2	0	Group 1
411	59.96666666666667	0	Group 2	412	59.9667	0	Group 2	412	62.86666666666667	0	Group 2									411	3.73333	0	Group 2	411	52.833333333333336	0	Group 2	411	126.1	0	Group 2	411	114.833	0	Group 2	411	121.93333333333334	0	Group 1
412	33.93333333333333	0	Group 2	413	33.9333	0	Group 2	413	121.6	0	Group 2									412	78.4333	0	Group 2	412	182.5	0	Group 2	412	103.667	0	Group 2	412	14.0333	1	Group 2	412	109.86666666666666	0	Group 1
413	45.3	0	Group 2	414	45.3	0	Group 2	414	71.2	0	Group 2									413	29.3333	0	Group 2	413	35.86666666666667	0	Group 2	413	114.7	0	Group 2	413	50.2667	1	Group 2	413	28	0	Group 1
414	28.233333333333334	0	Group 2	415	28.2333	0	Group 2	415	115.96666666666667	0	Group 2									414	99.0667	0	Group 2	414	120.63333333333334	0	Group 2	414	15.1667	0	Group 2	414	2.96667	0	Group 2	414	60.166666666666664	0	Group 1
415	4.933333333333334	0	Group 2	416	4.93333	0	Group 2	416	83.1	0	Group 2									415	108.433	0	Group 2	415	35.56666666666667	1	Group 2	415	73.0333	0	Group 2	415	100.567	0	Group 2	415	52.833333333333336	0	Group 1
416	59.666666666666664	0	Group 2	417	59.6667	0	Group 2	417	61.56666666666667	0	Group 2									416	25.1	1	Group 2	416	50.9	0	Group 2	416	98.7	0	Group 2	416	29.6	0	Group 2	416	108.13333333333334	0	Group 1
417	33.93333333333333	0	Group 2	418	33.9333	0	Group 2	418	90.96666666666667	0	Group 2									417	56.9333	0	Group 2	417	94.9	0	Group 2	417	121.2	0	Group 2	417	35.2	0	Group 2	417	38.06666666666667	0	Group 1
418	151.2	0	Group 2	419	151.2	0	Group 2	419	35.86666666666667	0	Group 2									418	51.4	0	Group 2	418	115.76666666666667	0	Group 2	418	79.3333	0	Group 2	418	1.7	0	Group 2	418	61.4	0	Group 1
419	36.43333333333333	0	Group 2	420	36.4333	0	Group 2	420	1.8333333333333333	0	Group 2									419	96.3667	0	Group 2	419	47.166666666666664	0	Group 2	419	97.9333	0	Group 2	419	3.33333	0	Group 2	419	68	1	Group 1
420	122.8	0	Group 2	421	122.8	0	Group 2	421	133.1	0	Group 2									420	79.6333	1	Group 2	420	121.13333333333334	0	Group 2	420	4.5	0	Group 2	420	74.7	0	Group 2	420	162.46666666666667	0	Group 1
421	70.46666666666667	0	Group 2	422	70.4667	0	Group 2	422	35	0	Group 2									421	97.0333	0	Group 2	421	139.56666666666666	0	Group 2	421	3.26667	0	Group 2	421	16.9	1	Group 2	421	111.86666666666666	0	Group 1
422	3	0	Group 2	423	3	0	Group 2	423	81.46666666666667	1	Group 2									422	107.533	0	Group 2	422	179.83333333333334	0	Group 2	422	130.5	0	Group 2	422	4.13333	0	Group 2	422	54.56666666666667	0	Group 1
423	95.83333333333333	0	Group 2	424	95.8333	0	Group 2	424	91.8	0	Group 2									423	39	0	Group 2	423	116.53333333333333	0	Group 2	423	152.867	0	Group 2	423	159.133	0	Group 2	423	173.2	0	Group 1
424	117.43333333333334	0	Group 2	425	117.433	0	Group 2	425	102	0	Group 2									424	75.3667	0	Group 2	424	146.43333333333334	0	Group 2	424	95.0667	0	Group 2	424	127.667	0	Group 2	424	73.96666666666667	0	Group 1
425	59.666666666666664	0	Group 2	426	59.6667	0	Group 2	426	31.966666666666665	0	Group 2									425	35.7333	0	Group 2	425	126.7	0	Group 2	425	89.3	0	Group 2	425	104.733	0	Group 2	425	131.43333333333334	0	Group 1
426	53.666666666666664	0	Group 2	427	53.6667	0	Group 2	427	10.733333333333333	0	Group 2									426	60.0667	0	Group 2	426	97.83333333333333	1	Group 2	426	102.633	0	Group 2	426	54.2667	0	Group 2	426	45.833333333333336	0	Group 1
427	45	0	Group 2	428	45	0	Group 2	428	4.633333333333334	0	Group 2									427	3.26667	0	Group 2	427	141.73333333333332	0	Group 2	427	111.033	0	Group 2	427	116.367	0	Group 2	427	1.4	0	Group 1
428	75.96666666666667	1	Group 2	429	75.9667	1	Group 2	429	5.766666666666667	0	Group 2									428	3.76667	0	Group 2	428	174.93333333333334	0	Group 2	428	103.667	0	Group 2	428	49.9333	0	Group 2	428	30.366666666666667	0	Group 1
429	107.56666666666666	0	Group 2	430	107.567	0	Group 2	430	28.366666666666667	0	Group 2									429	33.9333	0	Group 2	429	3.1	0	Group 2	429	39.2333	0	Group 2	429	47.3667	1	Group 2	429	34.5	0	Group 1
430	45.833333333333336	1	Group 2	431	45.8333	1	Group 2	431	71.96666666666667	0	Group 2									430	13.2667	0	Group 2	430	88.9	1	Group 2	430	131.833	0	Group 2	430	116.433	1	Group 2	430	3.6333333333333333	0	Group 2
431	3.1	0	Group 2	432	3.1	0	Group 2	432	71.2	0	Group 2									431	119.633	0	Group 2	431	63.96666666666667	0	Group 2	431	26.9667	0	Group 2	431	35.8	1	Group 2	431	61.766666666666666	0	Group 2
432	3.8	0	Group 2	433	3.8	0	Group 2	433	71.26666666666667	1	Group 2									432	1.7	0	Group 2	432	54.9	1	Group 2	432	36.2333	0	Group 2	432	3.46667	0	Group 2	432	11.833333333333334	0	Group 2
433	14.033333333333333	0	Group 2	434	14.0333	0	Group 2	434	89.36666666666666	0	Group 2									433	70.4667	0	Group 2	433	62.1	1	Group 2	433	40.5	1	Group 2	433	110.733	1	Group 2	433	156.66666666666666	0	Group 2
434	3.7666666666666666	0	Group 2	435	3.76667	0	Group 2	435	100.4	0	Group 2									434	72.2	0	Group 2	434	126.4	0	Group 2	434	61.8	1	Group 2	434	102.8	0	Group 2	434	45.5	0	Group 2
435	56.46666666666667	0	Group 2	436	56.4667	0	Group 2	436	59.5	0	Group 2									435	4.03333	0	Group 2	435	71.5	0	Group 2	435	69.4333	0	Group 2	435	3.4	0	Group 2	435	62.36666666666667	0	Group 2
436	10.5	0	Group 2	437	10.5	0	Group 2	437	52.93333333333333	0	Group 2									436	105.767	1	Group 2	436	100.5	0	Group 2	436	12.2	0	Group 2	436	133.267	0	Group 2	436	5.166666666666667	0	Group 2
437	60.7	1	Group 2	438	60.7	1	Group 2	438	143.4	0	Group 2									437	61.8333	1	Group 2	437	66.46666666666667	0	Group 2	437	52.9333	0	Group 2	437	15.6333	1	Group 2	437	9.566666666666666	0	Group 2
438	39	0	Group 2	439	39	0	Group 2	439	3	0	Group 2									438	59.9667	0	Group 2	438	117.43333333333334	0	Group 2	438	10.2333	0	Group 2	438	123.2	0	Group 2	438	111.7	0	Group 2
439	61.833333333333336	1	Group 2	440	61.8333	1	Group 2	440	57.733333333333334	0	Group 2									439	127.367	0	Group 2	439	155.93333333333334	0	Group 2	439	48.0667	1	Group 2	439	41.9	1	Group 2	439	26.933333333333334	0	Group 2
440	10.033333333333333	0	Group 2	441	10.0333	0	Group 2	441	3.2333333333333334	0	Group 2									440	33.8333	0	Group 2	440	123.3	0	Group 2	440	92.9	0	Group 2	440	128.233	0	Group 2	440	1.2	0	Group 2
441	29.166666666666668	0	Group 2	442	29.1667	0	Group 2	442	32.8	0	Group 2									441	5.23333	0	Group 2	441	36.13333333333333	0	Group 2	441	5.33333	0	Group 2	441	73.7	0	Group 2	441	12.633333333333333	0	Group 2
442	47.166666666666664	0	Group 2	443	47.1667	0	Group 2	443	182	0	Group 2									442	179.3	0	Group 2	442	16.3	0	Group 2	442	11.6333	0	Group 2	442	113.7	0	Group 2	442	2.2666666666666666	0	Group 2
443	90.96666666666667	1	Group 2	444	90.9667	1	Group 2	444	7.133333333333334	0	Group 2									443	5.3	0	Group 2	443	49.3	0	Group 2	443	51.9667	0	Group 2	443	25.2	1	Group 2	443	135.8	0	Group 2
444	12.633333333333333	0	Group 2	445	12.6333	0	Group 2	445	10.3	0	Group 2									444	1.63333	0	Group 2	444	10.066666666666666	0	Group 2	444	143.4	0	Group 2	444	55.3333	0	Group 2	444	88.66666666666667	0	Group 2
445	97.83333333333333	1	Group 2	446	97.8333	1	Group 2	446	133.76666666666668	0	Group 2									445	43.8667	1	Group 2	445	2.933333333333333	0	Group 2	445	109	0	Group 2	445	3	0	Group 2	445	78.4	0	Group 2
446	49.96666666666667	0	Group 2	447	49.9667	0	Group 2	447	11.866666666666667	0	Group 2									446	49.9667	0	Group 2					446	120.433	0	Group 2	446	96.6	0	Group 2	446	49	0	Group 2
447	7.9	0	Group 2	448	7.9	0	Group 2	448	124.8	0	Group 2									447	117.967	0	Group 2					447	113.5	0	Group 2	447	96.6	0	Group 2	447	121.96666666666667	0	Group 2
448	56.93333333333333	0	Group 2	449	56.9333	0	Group 2	449	96.13333333333334	0	Group 2									448	3.36667	0	Group 2					448	148.533	0	Group 2	448	68.3333	0	Group 2	448	121.03333333333333	0	Group 2
449	88.83333333333333	0	Group 2	450	88.8333	0	Group 2	450	4.7	0	Group 2									449	100.367	0	Group 2					449	97.0667	0	Group 2	449	3.03333	0	Group 2	449	55.03333333333333	0	Group 2
450	125.9	0	Group 2	451	125.9	0	Group 2	451	133.76666666666668	0	Group 2									450	92.8333	0	Group 2					450	10.7667	0	Group 2	450	2.83333	0	Group 2	450	111.06666666666666	0	Group 2
451	102.8	0	Group 2	452	102.8	0	Group 2	452	100.13333333333334	0	Group 2									451	83.1667	0	Group 2					451	100.4	0	Group 2	451	33.7	1	Group 2	451	72.53333333333333	0	Group 2
452	92.83333333333333	0	Group 2	453	92.8333	0	Group 2	453	111.7	1	Group 2									452	121.5	0	Group 2					452	2.8	0	Group 2	452	55.2	0	Group 2	452	56.46666666666667	0	Group 2
453	22.933333333333334	1	Group 2	454	22.9333	1	Group 2	454	99.66666666666667	0	Group 2									453	68.1	0	Group 2					453	92.6	1	Group 2	453	97.3333	0	Group 2	453	98.73333333333333	0	Group 2
454	24.233333333333334	0	Group 2	455	24.2333	0	Group 2	455	3.433333333333333	0	Group 2									454	29.1667	0	Group 2					454	76.2	0	Group 2	454	73.1	0	Group 2	454	80.7	0	Group 2
455	83.16666666666667	0	Group 2	456	83.1667	0	Group 2	456	123.6	0	Group 2									455	122.3	0	Group 2					455	73.7333	0	Group 2	455	107.067	0	Group 2	455	38.3	1	Group 2
456	13.933333333333334	1	Group 2	457	13.9333	1	Group 2	457	171.73333333333332	0	Group 2									456	151.2	0	Group 2					456	103.033	0	Group 2	456	84.2	0	Group 2	456	125	0	Group 2
457	49.3	0	Group 2	458	49.3	0	Group 2	458	48.56666666666667	0	Group 2									457	26.5667	1	Group 2					457	70.2	0	Group 2	457	36.1	0	Group 2	457	91.66666666666667	0	Group 2
458	26.566666666666666	1	Group 2	459	26.5667	1	Group 2	459	102.46666666666667	0	Group 2									458	2.8	0	Group 2					458	46.2667	0	Group 2	458	24.6667	1	Group 2	458	100.76666666666667	0	Group 2
459	5.7	0	Group 2	460	5.7	0	Group 2	460	145.63333333333333	0	Group 2									459	22.8	1	Group 2					459	115.967	0	Group 2	459	2.9	0	Group 2	459	59.46666666666667	0	Group 2
460	41.53333333333333	1	Group 2	461	41.5333	1	Group 2	461	78.43333333333334	0	Group 2									460	96.0333	0	Group 2					460	123.7	0	Group 2	460	57.3	0	Group 2	460	52.53333333333333	0	Group 2
461	31.033333333333335	1	Group 2	462	31.0333	1	Group 2	462	145.26666666666668	0	Group 2									461	23.9333	1	Group 2					461	56.7333	0	Group 2	461	68.3333	0	Group 2	461	36.46666666666667	0	Group 2
462	3.1	0	Group 2	463	3.1	0	Group 2	463	66.13333333333334	0	Group 2									462	4.93333	0	Group 2					462	13.9667	0	Group 2	462	111.6	1	Group 2	462	130.96666666666667	0	Group 2
463	55.56666666666667	0	Group 2	464	55.5667	0	Group 2	464	68.7	0	Group 2									463	5.86667	0	Group 2					463	63.7	1	Group 2	463	81.9333	1	Group 2	463	144.46666666666667	0	Group 2
464	10.066666666666666	0	Group 2	465	10.0667	0	Group 2	465	70.93333333333334	0	Group 2									464	20.6333	1	Group 2					464	107.767	1	Group 2	464	35.7	1	Group 2	464	34.4	0	Group 2
465	2.6	0	Group 2	466	2.6	0	Group 2	466	83.96666666666667	0	Group 2									465	14.0333	0	Group 2					465	137.833	0	Group 2	465	95.8667	1	Group 2	465	27	0	Group 2
466	101.33333333333333	1	Group 2	467	101.333	1	Group 2	467	13.5	0	Group 2									466	102.8	0	Group 2					466	71.9667	0	Group 2	466	15.5667	1	Group 2	466	75.2	0	Group 2
467	36.6	1	Group 2	468	36.6	1	Group 2	468	60.233333333333334	0	Group 2									467	110.933	0	Group 2					467	8.33333	0	Group 2	467	3.23333	0	Group 2	467	113.6	0	Group 2
468	13.633333333333333	1	Group 2	469	13.6333	1	Group 2	469	26.2	0	Group 2									468	70.6667	0	Group 2					468	59.5	0	Group 2	468	136	0	Group 2	468	83.93333333333334	0	Group 2
469	2.933333333333333	0	Group 2	470	2.93333	0	Group 2	470	104.23333333333333	0	Group 2									469	75.9667	1	Group 2					469	90.1667	0	Group 2	469	15.3667	1	Group 2	469	129.03333333333333	0	Group 2
470	4.533333333333333	0	Group 2	471	4.53333	0	Group 2	471	20.566666666666666	1	Group 2									470	41.5333	1	Group 2					470	122.867	0	Group 2					470	98.7	0	Group 2
471	66.76666666666667	1	Group 2	472	66.7667	1	Group 2	472	109.9	0	Group 2									471	1.86667	0	Group 2					471	4.53333	0	Group 2					471	157.46666666666667	0	Group 2
472	56.56666666666667	0	Group 2	473	56.5667	0	Group 2	473	62.06666666666667	0	Group 2									472	75.7333	0	Group 2					472	5.73333	0	Group 2					472	14.766666666666667	0	Group 2
473	2.6666666666666665	0	Group 2	474	2.66667	0	Group 2	474	168.76666666666668	0	Group 2									473	93	1	Group 2					473	73.3667	0	Group 2					473	97.5	0	Group 2
474	60.166666666666664	1	Group 2	475	60.1667	1	Group 2	475	37.86666666666667	1	Group 2									474	59.6667	0	Group 2					474	4.83333	0	Group 2					474	112	0	Group 2
475	43.86666666666667	1	Group 2	476	43.8667	1	Group 2	476	97.16666666666667	0	Group 2									475	24.2333	0	Group 2					475	155	0	Group 2					475	99.76666666666667	0	Group 2
476	70.9	0	Group 2	477	70.9	0	Group 2	477	148.56666666666666	0	Group 2									476	102.433	0	Group 2													476	6.733333333333333	0	Group 2
477	14.2	0	Group 2	478	14.2	0	Group 2	478	77.43333333333334	0	Group 2									477	49.9	0	Group 2													477	13.766666666666667	0	Group 2
478	40.63333333333333	1	Group 2	479	40.6333	1	Group 2	479	53.266666666666666	1	Group 2									478	114.5	0	Group 2													478	57.96666666666667	0	Group 2
479	45.5	1	Group 2	480	45.5	1	Group 2	480	90.16666666666667	0	Group 2									479	92.8333	0	Group 2													479	97.33333333333333	0	Group 2
480	24.5	1	Group 2	481	24.5	1	Group 2	481	141.83333333333334	0	Group 2									480	56.7333	1	Group 2													480	63.2	0	Group 2
481	24.333333333333332	1	Group 2	482	24.3333	1	Group 2	482	168.66666666666666	0	Group 2									481	14.6667	0	Group 2													481	57.46666666666667	0	Group 2
482	21.7	1	Group 2	483	21.7	1	Group 2	483	127.6	0	Group 2									482	95.8333	0	Group 2													482	31.5	0	Group 2
								484	4.833333333333333	0	Group 2									483	107.567	0	Group 2													483	34.63333333333333	0	Group 2
								485	30.3	0	Group 2									484	71.5333	1	Group 2													484	108.83333333333333	0	Group 2
								486	37.96666666666667	0	Group 2									485	109.1	0	Group 2													485	10	0	Group 2
								487	3.7333333333333334	0	Group 2									486	3.96667	0	Group 2													486	84.2	0	Group 2
								488	11.2	0	Group 2									487	60.7	1	Group 2													487	100.1	0	Group 2
								489	51.6	0	Group 2									488	55.5667	0	Group 2													488	49.03333333333333	0	Group 2
								490	85.23333333333333	0	Group 2									489	22.9333	1	Group 2													489	83.36666666666666	0	Group 2
								491	83.4	1	Group 2									490	3.1	0	Group 2													490	96.23333333333333	0	Group 2
								492	28.566666666666666	0	Group 2									491	1.5	0	Group 2													491	55.1	1	Group 2
								493	50.06666666666667	0	Group 2									492	14.2	0	Group 2													492	52.666666666666664	0	Group 2
								494	31.033333333333335	0	Group 2									493	58.1667	0	Group 2													493	166.03333333333333	1	Group 2
								495	10.966666666666667	0	Group 2									494	3.76667	0	Group 2													494	25.533333333333335	0	Group 2
								496	73.3	0	Group 2									495	60.5	0	Group 2													495	55.2	0	Group 2
								497	36.43333333333333	0	Group 2									496	125.9	0	Group 2													496	86.8	0	Group 2
								498	17.8	0	Group 2									497	11.0667	0	Group 2													497	40.333333333333336	0	Group 2
								499	15.2	0	Group 2									498	76.2	0	Group 2													498	176.86666666666667	0	Group 2
								500	146.46666666666667	0	Group 2									499	100.533	0	Group 2													499	61.233333333333334	0	Group 2
								501	3.3333333333333335	0	Group 2									500	88.8333	0	Group 2													500	31.366666666666667	0	Group 2
								502	4.7	0	Group 2									501	100.633	0	Group 2													501	103.13333333333334	0	Group 2
								503	91.9	0	Group 2									502	13.9333	1	Group 2													502	112.33333333333333	0	Group 2
								504	85.6	0	Group 2									503	97.2667	0	Group 2													503	37.2	0	Group 2
								505	59.666666666666664	0	Group 2									504	36.6	1	Group 2													504	73.63333333333334	0	Group 2
								506	36.6	1	Group 2									505	86.3	0	Group 2													505	1.2	0	Group 2
								507	8.033333333333333	0	Group 2									506	13.6333	1	Group 2													506	52.6	0	Group 2
								508	42.7	1	Group 2									507	17.5	1	Group 2													507	97.1	0	Group 2
								509	43.2	0	Group 2									508	130.033	0	Group 2													508	36.4	0	Group 2
								510	9.166666666666666	0	Group 2									509	128.933	0	Group 2													509	100.53333333333333	0	Group 2
								511	98.1	0	Group 2									510	29.5667	0	Group 2													510	88.7	0	Group 2
								512	106.06666666666666	0	Group 2									511	56.5667	0	Group 2													511	36.233333333333334	0	Group 2
								513	142.8	0	Group 2									512	5.7	0	Group 2													512	4.933333333333334	0	Group 2
								514	41.9	1	Group 2									513	106.867	0	Group 2													513	51.63333333333333	0	Group 2
								515	1.7	0	Group 2									514	70.9	0	Group 2													514	3.966666666666667	0	Group 2
								516	90.16666666666667	0	Group 2									515	4.53333	0	Group 2													515	12.933333333333334	0	Group 2
								517	55.3	0	Group 2									516	108.4	0	Group 2													516	72.03333333333333	0	Group 2
								518	178.8	0	Group 2									517	2.6	0	Group 2													517	37.7	0	Group 2
								519	10.133333333333333	0	Group 2									518	102.8	0	Group 2													518	3.033333333333333	0	Group 2
								520	155	0	Group 2									519	166.3	0	Group 2													519	182.66666666666666	0	Group 2
								521	73.03333333333333	0	Group 2									520	87.5333	0	Group 2													520	41.93333333333333	0	Group 2
								522	3.2666666666666666	0	Group 2									521	59.4667	0	Group 2													521	72.96666666666667	0	Group 2
								523	31.766666666666666	0	Group 2									522	60.1667	1	Group 2													522	113.23333333333333	0	Group 2
								524	4.5	0	Group 2									523	45.5	1	Group 2													523	62.166666666666664	0	Group 2
								525	3.4	0	Group 2									524	66.7667	1	Group 2													524	33.9	0	Group 2
								526	32.43333333333333	0	Group 2									525	2.66667	0	Group 2													525	116.33333333333333	0	Group 2
								527	25.7	0	Group 2									526	65.8667	1	Group 2													526	111.36666666666666	0	Group 2
								528	81.2	0	Group 2									527	146.8	0	Group 2													527	35.733333333333334	0	Group 2
								529	95.63333333333334	0	Group 2									528	24.5	1	Group 2													528	39.9	0	Group 2
								530	58.2	0	Group 2									529	24.3333	1	Group 2													529	123.4	0	Group 2
								531	80.03333333333333	0	Group 2									530	101.333	1	Group 2													530	13.033333333333333	0	Group 2
								532	49.86666666666667	1	Group 2									531	40.6333	1	Group 2													531	30.066666666666666	0	Group 2
								533	101.16666666666667	0	Group 2									532	21.7	1	Group 2													532	117.36666666666666	0	Group 2
								534	159.13333333333333	0	Group 2									533	16.7	1	Group 2													533	5.733333333333333	0	Group 2
								535	147.2	0	Group 2																									534	74.36666666666666	1	Group 2
								536	2.933333333333333	0	Group 2																									535	141.83333333333334	0	Group 2
								537	84.5	0	Group 2																									536	138.76666666666668	0	Group 2
								538	112.86666666666666	0	Group 2																									537	57.166666666666664	0	Group 2
								539	19.966666666666665	0	Group 2																									538	51.8	0	Group 2
								540	29.566666666666666	0	Group 2																									539	56.46666666666667	0	Group 2
								541	92.16666666666667	0	Group 2																									540	67.76666666666667	0	Group 2
								542	35.8	1	Group 2																									541	12.233333333333333	0	Group 2
								543	73.33333333333333	0	Group 2																									542	72.76666666666667	0	Group 2
								544	127.66666666666667	0	Group 2																									543	5.966666666666667	0	Group 2
								545	2.966666666666667	0	Group 2																									544	159.33333333333334	0	Group 2
								546	13.2	0	Group 2																									545	115.86666666666666	0	Group 2
								547	35.36666666666667	0	Group 2																									546	124.33333333333333	0	Group 2
								548	104.7	0	Group 2																									547	133.33333333333334	0	Group 2
								549	96.6	0	Group 2																									548	52.8	0	Group 2
								550	100.56666666666666	0	Group 2																									549	79.5	0	Group 2
								551	3.033333333333333	0	Group 2																									550	48.46666666666667	0	Group 2
								552	3.3333333333333335	0	Group 2																									551	126.63333333333334	0	Group 2
								553	96.6	0	Group 2																									552	57.7	0	Group 2
								554	102.8	0	Group 2																									553	95.1	0	Group 2
								555	113.7	0	Group 2																									554	18.2	0	Group 2
								556	89.36666666666666	1	Group 2																									555	9.566666666666666	0	Group 2
								557	54.8	0	Group 2																									556	33.6	0	Group 2
								558	29.866666666666667	0	Group 2																									557	110.63333333333334	0	Group 2
								559	116.43333333333334	1	Group 2																									558	71.83333333333333	0	Group 2
								560	104.73333333333333	0	Group 2																									559	5.233333333333333	0	Group 2
								561	4.133333333333334	0	Group 2																									560	46.53333333333333	0	Group 2
								562	2.8333333333333335	0	Group 2																									561	31.966666666666665	0	Group 2
								563	110.73333333333333	1	Group 2																									562	7.433333333333334	0	Group 2
								564	47.36666666666667	1	Group 2																									563	24.166666666666668	1	Group 2
								565	36.1	0	Group 2																									564	77.9	0	Group 2
								566	74.7	0	Group 2																									565	84.36666666666666	0	Group 2
								567	3.466666666666667	0	Group 2																									566	13.2	0	Group 2
								568	49.93333333333333	0	Group 2																									567	3.033333333333333	0	Group 2
								569	77.93333333333334	0	Group 2																									568	113.56666666666666	1	Group 2
								570	3.033333333333333	0	Group 2																									569	35.1	1	Group 2
								571	55.2	0	Group 2																									570	63.9	0	Group 2
								572	128.23333333333332	0	Group 2																									571	120.43333333333334	0	Group 2
								573	91	0	Group 2																									572	85.86666666666666	0	Group 2
								574	40.43333333333333	0	Group 2																									573	123.03333333333333	0	Group 2
								575	73.1	0	Group 2																									574	60.3	0	Group 2
								576	2.9	0	Group 2																									575	51.06666666666667	0	Group 2
								577	3	0	Group 2																									576	66.16666666666667	0	Group 2
								578	3.2333333333333334	0	Group 2																									577	111.76666666666667	0	Group 2
								579	95.86666666666666	1	Group 2																									578	91.9	0	Group 2
								580	107.06666666666666	0	Group 2																									579	76.36666666666666	0	Group 2
								581	68.33333333333333	0	Group 2																									580	103.4	0	Group 2
								582	35.7	1	Group 2																									581	75.9	0	Group 2
								583	133.26666666666668	0	Group 2																									582	33.93333333333333	0	Group 2
								584	81.93333333333334	1	Group 2																									583	86.83333333333333	0	Group 2
								585	136	0	Group 2																									584	50.3	0	Group 2
								586	57.3	0	Group 2																									585	12.866666666666667	0	Group 2
								587	15.366666666666667	1	Group 2																									586	5.833333333333333	0	Group 2
								588	111.6	1	Group 2																									587	53.2	0	Group 2
																																				588	48.733333333333334	0	Group 2
																																				589	48.833333333333336	1	Group 2
																																				590	36.63333333333333	0	Group 2
																																				591	11.433333333333334	0	Group 2
																																				592	36	0	Group 2
																																				593	3.3666666666666667	0	Group 2
																																				594	165.36666666666667	1	Group 2
																																				595	112.86666666666666	0	Group 2
																																				596	3.7666666666666666	0	Group 2
																																				597	90.03333333333333	0	Group 2
																																				598	5.533333333333333	0	Group 2
																																				599	182.5	0	Group 2
																																				600	120.63333333333334	0	Group 2
																																				601	35.56666666666667	1	Group 2
																																				602	50.9	0	Group 2
																																				603	68.86666666666666	0	Group 2
																																				604	94.9	0	Group 2
																																				605	28.233333333333334	0	Group 2
																																				606	3.033333333333333	0	Group 2
																																				607	8.133333333333333	0	Group 2
																																				608	121.13333333333334	0	Group 2
																																				609	139.56666666666666	0	Group 2
																																				610	155.66666666666666	0	Group 2
																																				611	179.83333333333334	0	Group 2
																																				612	12.3	0	Group 2
																																				613	3.7333333333333334	0	Group 2
																																				614	105.6	0	Group 2
																																				615	146.43333333333334	0	Group 2
																																				616	126.7	0	Group 2
																																				617	51.56666666666667	0	Group 2
																																				618	97.83333333333333	1	Group 2
																																				619	13.866666666666667	0	Group 2
																																				620	122.8	0	Group 2
																																				621	67.23333333333333	0	Group 2
																																				622	122.33333333333333	0	Group 2
																																				623	174.93333333333334	0	Group 2
																																				624	88.9	1	Group 2
																																				625	56.93333333333333	0	Group 2
																																				626	51.4	0	Group 2
																																				627	63.96666666666667	0	Group 2
																																				628	54.9	1	Group 2
																																				629	97.03333333333333	0	Group 2
																																				630	107.53333333333333	0	Group 2
																																				631	62.1	1	Group 2
																																				632	126.4	0	Group 2
																																				633	71.5	0	Group 2
																																				634	100.5	0	Group 2
																																				635	4.033333333333333	0	Group 2
																																				636	127.36666666666666	0	Group 2
																																				637	66.46666666666667	0	Group 2
																																				638	3.3666666666666667	0	Group 2
																																				639	100.36666666666666	0	Group 2
																																				640	117.43333333333334	0	Group 2
																																				641	2.8	0	Group 2
																																				642	155.93333333333334	0	Group 2
																																				643	123.3	0	Group 2
																																				644	1.8666666666666667	0	Group 2
																																				645	49.9	0	Group 2
																																				646	1.5	0	Group 2
																																				647	3.7666666666666666	0	Group 2
																																				648	11.066666666666666	0	Group 2
																																				649	10.066666666666666	0	Group 2
																																				650	4.533333333333333	0	Group 2

## Sheet: fig.5
Fig.5(a,b,c)				Fig.5(d,e,f)				Fig.5(g,h,i)
group	slice_idx	attention_score	risk_score	group	slice_idx	attention_score	risk_score	group	slice_idx	attention_score	risk_score
low	0	0.4254142642021179	-2.90421	high	0	0.483124	0.722218	low	0	0.25024	0.20318
low	1	0.4254142642021179	-2.90421	high	1	0.483124	0.722218	low	1	0.25024	0.20318
low	2	0.4254142642021179	-2.90421	high	2	0.483124	0.722218	low	2	0.25024	0.20318
low	3	0.4254142642021179	-2.90421	high	3	0.483124	0.722218	low	3	0.25024	0.20318
low	4	0.4254142642021179	-2.90421	high	4	0.483124	0.722218	low	4	0.25024	0.20318
low	5	0.4254142642021179	-2.90421	high	5	0.483124	0.722218	low	5	0.25024	0.20318
low	6	0.4254142642021179	-2.90421	high	6	0.483124	0.722218	low	6	0.25024	0.20318
low	7	0.4254142642021179	-2.90421	high	7	0.483124	0.722218	low	7	0.25024	0.20318
low	8	0.4254142642021179	-2.90421	high	8	0.483124	0.722218	low	8	0.25024	0.20318
low	9	0.4254142642021179	-2.90421	high	9	0.483124	0.722218	low	9	0.25024	0.20318
low	10	0.4254142642021179	-2.90421	high	10	0.483124	0.722218	low	10	0.25024	0.20318
low	11	0.4254142642021179	-2.90421	high	11	0.483124	0.722218	low	11	0.25024	0.20318
low	12	0.4254142642021179	-2.90421	high	12	0.483124	0.722218	low	12	0.25024	0.20318
low	13	0.4254142642021179	-2.90421	high	13	0.483124	0.722218	low	13	0.25024	0.20318
low	14	0.4254142642021179	-2.90421	high	14	0.483124	0.722218	low	14	0.25024	0.20318
low	15	0.4254142642021179	-2.90421	high	15	0.483124	0.722218	low	15	0.25024	0.20318
low	16	0.43308526277542114	-2.90421	high	16	0.489623	0.722218	low	16	0.256506	0.20318
low	17	0.4484102725982666	-2.90421	high	17	0.50262	0.722218	low	17	0.269041	0.20318
low	18	0.463775	-2.90421	high	18	0.51562	0.722218	low	18	0.281576	0.20318
low	19	0.47912269830703735	-2.90421	high	19	0.528621	0.722218	low	19	0.294113	0.20318
low	20	0.49447232484817505	-2.90421	high	20	0.541625	0.722218	low	20	0.306651	0.20318
low	21	0.5098247528076172	-2.90421	high	21	0.554632	0.722218	low	21	0.319189	0.20318
low	22	0.5251791477203369	-2.90421	high	22	0.567639	0.722218	low	22	0.331728	0.20318
low	23	0.540536	-2.90421	high	23	0.580648	0.722218	low	23	0.344268	0.20318
low	24	0.5558944940567017	-2.90421	high	24	0.593657	0.722218	low	24	0.356808	0.20318
low	25	0.5712548494338989	-2.90421	high	25	0.606668	0.722218	low	25	0.369349	0.20318
low	26	0.5866166949272156	-2.90421	high	26	0.61968	0.722218	low	26	0.38189	0.20318
low	27	0.6019803881645203	-2.90421	high	27	0.632693	0.722218	low	27	0.394433	0.20318
low	28	0.617345	-2.90421	high	28	0.645707	0.722218	low	28	0.406975	0.20318
low	29	0.6327102184295654	-2.90421	high	29	0.658723	0.722218	low	29	0.419519	0.20318
low	30	0.6480773687362671	-2.90421	high	30	0.671739	0.722218	low	30	0.432062	0.20318
low	31	0.6634448766708374	-2.90421	high	31	0.684756	0.722218	low	31	0.444606	0.20318
low	32	0.678813	-2.90421	high	32	0.697774	0.722218	low	32	0.45715	0.20318
low	33	0.694182	-2.90421	high	33	0.710793	0.722218	low	33	0.469694	0.20318
low	34	0.7095532417297363	-2.90421	high	34	0.723813	0.722218	low	34	0.482238	0.20318
low	35	0.7249255180358887	-2.90421	high	35	0.736834	0.722218	low	35	0.494783	0.20318
low	36	0.7402992248535156	-2.90421	high	36	0.749856	0.722218	low	36	0.507328	0.20318
low	37	0.7556735873222351	-2.90421	high	37	0.762879	0.722218	low	37	0.519874	0.20318
low	38	0.7710492610931396	-2.90421	high	38	0.775904	0.722218	low	38	0.532419	0.20318
low	39	0.7864251136779785	-2.90421	high	39	0.788929	0.722218	low	39	0.544965	0.20318
low	40	0.8018016815185547	-2.90421	high	40	0.801955	0.722218	low	40	0.557511	0.20318
low	41	0.8171787261962891	-2.90421	high	41	0.814982	0.722218	low	41	0.570057	0.20318
low	42	0.8325567245483398	-2.90421	high	42	0.828009	0.722218	low	42	0.582604	0.20318
low	43	0.8479351997375488	-2.90421	high	43	0.841038	0.722218	low	43	0.59515	0.20318
low	44	0.8633147478103638	-2.90421	high	44	0.854068	0.722218	low	44	0.607697	0.20318
low	45	0.8786953091621399	-2.90421	high	45	0.867098	0.722218	low	45	0.620244	0.20318
low	46	0.8940765261650085	-2.90421	high	46	0.880129	0.722218	low	46	0.63279	0.20318
low	47	0.9094579815864563	-2.90421	high	47	0.893161	0.722218	low	47	0.645337	0.20318
low	48	0.9134145975112915	-2.90421	high	48	0.896908	0.722218	low	48	0.655859	0.20318
low	49	0.9059559106826782	-2.90421	high	49	0.891375	0.722218	low	49	0.664357	0.20318
low	50	0.8985099792480469	-2.90421	high	50	0.885848	0.722218	low	50	0.672854	0.20318
low	51	0.8910767436027527	-2.90421	high	51	0.880328	0.722218	low	51	0.681353	0.20318
low	52	0.8836504220962524	-2.90421	high	52	0.874775	0.722218	low	52	0.689852	0.20318
low	53	0.876241	-2.90421	high	53	0.86931	0.722218	low	53	0.698352	0.20318
low	54	0.8688400387763977	-2.90421	high	54	0.863814	0.722218	low	54	0.706852	0.20318
low	55	0.8614505529403687	-2.90421	high	55	0.858324	0.722218	low	55	0.715353	0.20318
low	56	0.8540763854980469	-2.90421	high	56	0.852844	0.722218	low	56	0.723854	0.20318
low	57	0.8467128872871399	-2.90421	high	57	0.847374	0.722218	low	57	0.732357	0.20318
low	58	0.8393603563308716	-2.90421	high	58	0.84191	0.722218	low	58	0.74086	0.20318
low	59	0.8320225477218628	-2.90421	high	59	0.83642	0.722218	low	59	0.749364	0.20318
low	60	0.8246946334838867	-2.90421	high	60	0.831012	0.722218	low	60	0.757868	0.20318
low	61	0.8173799514770508	-2.90421	high	61	0.825583	0.722218	low	61	0.766372	0.20318
low	62	0.8100760579109192	-2.90421	high	62	0.820164	0.722218	low	62	0.774876	0.20318
low	63	0.8027852773666382	-2.90421	high	63	0.814757	0.722218	low	63	0.783381	0.20318
low	64	0.7955085039138794	-2.90421	high	64	0.809363	0.722218	low	64	0.791886	0.20318
low	65	0.7882428169250488	-2.90421	high	65	0.803981	0.722218	low	65	0.800391	0.20318
low	66	0.7809914946556091	-2.90421	high	66	0.798618	0.722218	low	66	0.808896	0.20318
low	67	0.7737533450126648	-2.90421	high	67	0.793266	0.722218	low	67	0.817402	0.20318
low	68	0.7665265798568726	-2.90421	high	68	0.787929	0.722218	low	68	0.825909	0.20318
low	69	0.7593139410018921	-2.90421	high	69	0.782609	0.722218	low	69	0.834416	0.20318
low	70	0.7521120309829712	-2.90421	high	70	0.777301	0.722218	low	70	0.842923	0.20318
low	71	0.7449213862419128	-2.90421	high	71	0.772009	0.722218	low	71	0.851431	0.20318
low	72	0.7377460598945618	-2.90421	high	72	0.766741	0.722218	low	72	0.859939	0.20318
low	73	0.7305823564529419	-2.90421	high	73	0.761486	0.722218	low	73	0.868448	0.20318
low	74	0.7234357595443726	-2.90421	high	74	0.756247	0.722218	low	74	0.876956	0.20318
low	75	0.7163018584251404	-2.90421	high	75	0.751028	0.722218	low	75	0.885466	0.20318
low	76	0.7091799378395081	-2.90421	high	76	0.745829	0.722218	low	76	0.893942	0.20318
low	77	0.7020752429962158	-2.90421	high	77	0.740647	0.722218	low	77	0.902485	0.20318
low	78	0.6949818134307861	-2.90421	high	78	0.735484	0.722218	low	78	0.910996	0.20318
low	79	0.6879021525382996	-2.90421	high	79	0.730348	0.722218	low	79	0.919507	0.20318
low	80	0.6852891445159912	-2.90421	high	80	0.729114	0.722218	low	80	0.922375	0.20318
low	81	0.6871305704116821	-2.90421	high	81	0.731781	0.722218	low	81	0.919601	0.20318
low	82	0.6889724731445312	-2.90421	high	82	0.73447	0.722218	low	82	0.916793	0.20318
low	83	0.690815	-2.90421	high	83	0.737194	0.722218	low	83	0.914053	0.20318
low	84	0.6926589012145996	-2.90421	high	84	0.739946	0.722218	low	84	0.911279	0.20318
low	85	0.6945028901100159	-2.90421	high	85	0.742725	0.722218	low	85	0.908505	0.20318
low	86	0.6963471174240112	-2.90421	high	86	0.745537	0.722218	low	86	0.905732	0.20318
low	87	0.6981917023658752	-2.90421	high	87	0.748382	0.722218	low	87	0.902959	0.20318
low	88	0.7000365257263184	-2.90421	high	88	0.751266	0.722218	low	88	0.900185	0.20318
low	89	0.7018817067146301	-2.90421	high	89	0.754193	0.722218	low	89	0.897379	0.20318
low	90	0.7037271857261658	-2.90421	high	90	0.757158	0.722218	low	90	0.894639	0.20318
low	91	0.7055734395980835	-2.90421	high	91	0.760162	0.722218	low	91	0.891867	0.20318
low	92	0.7074200510978699	-2.90421	high	92	0.763214	0.722218	low	92	0.889094	0.20318
low	93	0.7092671394348145	-2.90421	high	93	0.766317	0.722218	low	93	0.886322	0.20318
low	94	0.7111144065856934	-2.90421	high	94	0.76948	0.722218	low	94	0.883551	0.20318
low	95	0.712962	-2.90421	high	95	0.772698	0.722218	low	95	0.880779	0.20318
low	96	0.7148107290267944	-2.90421	high	96	0.77597	0.722218	low	96	0.878008	0.20318
low	97	0.7166600227355957	-2.90421	high	97	0.779314	0.722218	low	97	0.875237	0.20318
low	98	0.7185097932815552	-2.90421	high	98	0.782733	0.722218	low	98	0.872466	0.20318
low	99	0.7203601002693176	-2.90421	high	99	0.786227	0.722218	low	99	0.869695	0.20318
low	100	0.7222108244895935	-2.90421	high	100	0.789785	0.722218	low	100	0.866925	0.20318
low	101	0.7240625619888306	-2.90421	high	101	0.793489	0.722218	low	101	0.864156	0.20318
low	102	0.7259147763252258	-2.90421	high	102	0.797265	0.722218	low	102	0.861386	0.20318
low	103	0.7277671694755554	-2.90421	high	103	0.801166	0.722218	low	103	0.858617	0.20318
low	104	0.72962	-2.90421	high	104	0.80521	0.722218	low	104	0.855848	0.20318
low	105	0.7314735054969788	-2.90421	high	105	0.809402	0.722218	low	105	0.85308	0.20318
low	106	0.7333270311355591	-2.90421	high	106	0.813974	0.722218	low	106	0.850311	0.20318
low	107	0.7351807355880737	-2.90421	high	107	0.819207	0.722218	low	107	0.847543	0.20318
low	108	0.7370347380638123	-2.90421	high	108	0.825228	0.722218	low	108	0.844775	0.20318
low	109	0.7388889193534851	-2.90421	high	109	0.832231	0.722218	low	109	0.842008	0.20318
low	110	0.7407437562942505	-2.90421	high	110	0.840315	0.722218	low	110	0.839241	0.20318
low	111	0.7425990700721741	-2.90421	high	111	0.8496	0.722218	low	111	0.836474	0.20318
low	112	0.7409762144088745	-2.90421	high	112	0.851088	0.722218	low	112	0.82896	0.20318
low	113	0.7358750104904175	-2.90421	high	113	0.843806	0.722218	low	113	0.816698	0.20318
low	114	0.7307745814323425	-2.90421	high	114	0.836533	0.722218	low	114	0.804437	0.20318
low	115	0.7256746292114258	-2.90421	high	115	0.82927	0.722218	low	115	0.792176	0.20318
low	116	0.7205753326416016	-2.90421	high	116	0.822017	0.722218	low	116	0.779915	0.20318
low	117	0.715476	-2.90421	high	117	0.814773	0.722218	low	117	0.767654	0.20318
low	118	0.7103780508041382	-2.90421	high	118	0.80754	0.722218	low	118	0.755393	0.20318
low	119	0.7052804827690125	-2.90421	high	119	0.800315	0.722218	low	119	0.743132	0.20318
low	120	0.7001481652259827	-2.90421	high	120	0.793099	0.722218	low	120	0.730871	0.20318
low	121	0.6950857043266296	-2.90421	high	121	0.785894	0.722218	low	121	0.71861	0.20318
low	122	0.6899884343147278	-2.90421	high	122	0.778697	0.722218	low	122	0.706349	0.20318
low	123	0.6848922371864319	-2.90421	high	123	0.771502	0.722218	low	123	0.694088	0.20318
low	124	0.6797963976860046	-2.90421	high	124	0.764337	0.722218	low	124	0.681827	0.20318
low	125	0.6747006177902222	-2.90421	high	125	0.757172	0.722218	low	125	0.669566	0.20318
low	126	0.6696050763130188	-2.90421	high	126	0.750019	0.722218	low	126	0.657306	0.20318
low	127	0.6645100712776184	-2.90421	high	127	0.742878	0.722218	low	127	0.645045	0.20318
low	128	0.6594166159629822	-2.90421	high	128	0.735749	0.722218	low	128	0.632784	0.20318
low	129	0.654324	-2.90421	high	129	0.728622	0.722218	low	129	0.620524	0.20318
low	130	0.6492316722869873	-2.90421	high	130	0.721526	0.722218	low	130	0.608263	0.20318
low	131	0.6441407203674316	-2.90421	high	131	0.714431	0.722218	low	131	0.596003	0.20318
low	132	0.6390506029129028	-2.90421	high	132	0.707349	0.722218	low	132	0.583742	0.20318
low	133	0.6339616775512695	-2.90421	high	133	0.700279	0.722218	low	133	0.571482	0.20318
low	134	0.6288734674453735	-2.90421	high	134	0.693222	0.722218	low	134	0.559223	0.20318
low	135	0.6237853765487671	-2.90421	high	135	0.686177	0.722218	low	135	0.546963	0.20318
low	136	0.6186981797218323	-2.90421	high	136	0.679134	0.722218	low	136	0.534703	0.20318
low	137	0.6136121153831482	-2.90421	high	137	0.672124	0.722218	low	137	0.522444	0.20318
low	138	0.6085273027420044	-2.90421	high	138	0.665118	0.722218	low	138	0.510184	0.20318
low	139	0.6034437417984009	-2.90421	high	139	0.658125	0.722218	low	139	0.497925	0.20318
low	140	0.5983606576919556	-2.90421	high	140	0.651145	0.722218	low	140	0.485667	0.20318
low	141	0.5932782888412476	-2.90421	high	141	0.644178	0.722218	low	141	0.473408	0.20318
low	142	0.588197	-2.90421	high	142	0.637223	0.722218	low	142	0.461149	0.20318
low	143	0.5831178426742554	-2.90421	high	143	0.630273	0.722218	low	143	0.448891	0.20318
low	144	0.5805789232254028	-2.90421	high	144	0.626818	0.722218	low	144	0.442762	0.20318
low	145	0.5805789232254028	-2.90421	high	145	0.626818	0.722218	low	145	0.442762	0.20318
low	146	0.5805789232254028	-2.90421	high	146	0.626818	0.722218	low	146	0.442762	0.20318
low	147	0.5805789232254028	-2.90421	high	147	0.626818	0.722218	low	147	0.442762	0.20318
low	148	0.5805789232254028	-2.90421	high	148	0.626818	0.722218	low	148	0.442762	0.20318
low	149	0.5805789232254028	-2.90421	high	149	0.626818	0.722218	low	149	0.442762	0.20318
low	150	0.5805789232254028	-2.90421	high	150	0.626818	0.722218	low	150	0.442762	0.20318
low	151	0.5805789232254028	-2.90421	high	151	0.626818	0.722218	low	151	0.442762	0.20318
low	152	0.5805789232254028	-2.90421	high	152	0.626818	0.722218	low	152	0.442762	0.20318
low	153	0.5805789232254028	-2.90421	high	153	0.626818	0.722218	low	153	0.442762	0.20318
low	154	0.5805789232254028	-2.90421	high	154	0.626818	0.722218	low	154	0.442762	0.20318
low	155	0.5805789232254028	-2.90421	high	155	0.626818	0.722218	low	155	0.442762	0.20318
low	156	0.5805789232254028	-2.90421	high	156	0.626818	0.722218	low	156	0.442762	0.20318
low	157	0.5805789232254028	-2.90421	high	157	0.626818	0.722218	low	157	0.442762	0.20318
low	158	0.5805789232254028	-2.90421	high	158	0.626818	0.722218	low	158	0.442762	0.20318
low	159	0.5805789232254028	-2.90421	high	159	0.626818	0.722218	low	159	0.442762	0.20318
low	0	0.4685607850551605	-2.97368	high	0	0.943046	0.677604	high	0	0.231787	0.806354
low	1	0.4685607850551605	-2.97368	high	1	0.943046	0.677604	high	1	0.231787	0.806354
low	2	0.4685607850551605	-2.97368	high	2	0.943046	0.677604	high	2	0.231787	0.806354
low	3	0.4685607850551605	-2.97368	high	3	0.943046	0.677604	high	3	0.231787	0.806354
low	4	0.4685607850551605	-2.97368	high	4	0.943046	0.677604	high	4	0.231787	0.806354
low	5	0.4685607850551605	-2.97368	high	5	0.943046	0.677604	high	5	0.231787	0.806354
low	6	0.4685607850551605	-2.97368	high	6	0.943046	0.677604	high	6	0.231787	0.806354
low	7	0.4685607850551605	-2.97368	high	7	0.943046	0.677604	high	7	0.231787	0.806354
low	8	0.4685607850551605	-2.97368	high	8	0.943046	0.677604	high	8	0.231787	0.806354
low	9	0.4685607850551605	-2.97368	high	9	0.943046	0.677604	high	9	0.231787	0.806354
low	10	0.4685607850551605	-2.97368	high	10	0.943046	0.677604	high	10	0.231787	0.806354
low	11	0.4685607850551605	-2.97368	high	11	0.943046	0.677604	high	11	0.231787	0.806354
low	12	0.4685607850551605	-2.97368	high	12	0.943046	0.677604	high	12	0.231787	0.806354
low	13	0.4685607850551605	-2.97368	high	13	0.943046	0.677604	high	13	0.231787	0.806354
low	14	0.4685607850551605	-2.97368	high	14	0.943046	0.677604	high	14	0.231787	0.806354
low	15	0.4685607850551605	-2.97368	high	15	0.943046	0.677604	high	15	0.231787	0.806354
low	16	0.47374552488327026	-2.97368	high	16	0.937969	0.677604	high	16	0.23685	0.806354
low	17	0.4839187264442444	-2.97368	high	17	0.928566	0.677604	high	17	0.247058	0.806354
low	18	0.4945111870765686	-2.97368	high	18	0.919168	0.677604	high	18	0.25737	0.806354
low	19	0.5046481490135193	-2.97368	high	19	0.909744	0.677604	high	19	0.26779	0.806354
low	20	0.5153223276138306	-2.97368	high	20	0.900866	0.677604	high	20	0.278315	0.806354
low	21	0.5257408618927002	-2.97368	high	21	0.891912	0.677604	high	21	0.288946	0.806354
low	22	0.5361648797988892	-2.97368	high	22	0.882865	0.677604	high	22	0.299692	0.806354
low	23	0.5462889075279236	-2.97368	high	23	0.874502	0.677604	high	23	0.31055	0.806354
low	24	0.5570405721664429	-2.97368	high	24	0.865589	0.677604	high	24	0.321536	0.806354
low	25	0.5674912333488464	-2.97368	high	25	0.857192	0.677604	high	25	0.33266	0.806354
low	26	0.5779458284378052	-2.97368	high	26	0.849038	0.677604	high	26	0.343946	0.806354
low	27	0.5880511403083801	-2.97368	high	27	0.840296	0.677604	high	27	0.355428	0.806354
low	28	0.598683	-2.97368	high	28	0.83201	0.677604	high	28	0.367155	0.806354
low	29	0.6093673706054688	-2.97368	high	29	0.82419	0.677604	high	29	0.379183	0.806354
low	30	0.6198593378067017	-2.97368	high	30	0.816013	0.677604	high	30	0.391535	0.806354
low	31	0.6303547024726868	-2.97368	high	31	0.807453	0.677604	high	31	0.404207	0.806354
low	32	0.640853	-2.97368	high	32	0.799764	0.677604	high	32	0.417107	0.806354
low	33	0.6512620449066162	-2.97368	high	33	0.791385	0.677604	high	33	0.430188	0.806354
low	34	0.6618680953979492	-2.97368	high	34	0.783431	0.677604	high	34	0.443483	0.806354
low	35	0.672388	-2.97368	high	35	0.775653	0.677604	high	35	0.456933	0.806354
low	36	0.6829102039337158	-2.97368	high	36	0.767661	0.677604	high	36	0.470486	0.806354
low	37	0.6934358477592468	-2.97368	high	37	0.759005	0.677604	high	37	0.484134	0.806354
low	38	0.7039655447006226	-2.97368	high	38	0.751064	0.677604	high	38	0.497865	0.806354
low	39	0.7142959833145142	-2.97368	high	39	0.743078	0.677604	high	39	0.511674	0.806354
low	40	0.7249014973640442	-2.97368	high	40	0.735163	0.677604	high	40	0.525537	0.806354
low	41	0.7355943322181702	-2.97368	high	41	0.727428	0.677604	high	41	0.539438	0.806354
low	42	0.7461539506912231	-2.97368	high	42	0.719586	0.677604	high	42	0.553364	0.806354
low	43	0.7567156553268433	-2.97368	high	43	0.711752	0.677604	high	43	0.567308	0.806354
low	44	0.7672807574272156	-2.97368	high	44	0.703803	0.677604	high	44	0.581267	0.806354
low	45	0.7778490781784058	-2.97368	high	45	0.695855	0.677604	high	45	0.595236	0.806354
low	46	0.7884200215339661	-2.97368	high	46	0.687843	0.677604	high	46	0.609214	0.806354
low	47	0.7986500859260559	-2.97368	high	47	0.679765	0.677604	high	47	0.623199	0.806354
low	48	0.8023635149002075	-2.97368	high	48	0.676124	0.677604	high	48	0.633776	0.806354
low	49	0.7985255122184753	-2.97368	high	49	0.676926	0.677604	high	49	0.640946	0.806354
low	50	0.7946920394897461	-2.97368	high	50	0.677404	0.677604	high	50	0.648122	0.806354
low	51	0.7908636331558228	-2.97368	high	51	0.677887	0.677604	high	51	0.655303	0.806354
low	52	0.787049	-2.97368	high	52	0.678505	0.677604	high	52	0.662488	0.806354
low	53	0.7832211256027222	-2.97368	high	53	0.679267	0.677604	high	53	0.669678	0.806354
low	54	0.7795088291168213	-2.97368	high	54	0.680625	0.677604	high	54	0.676871	0.806354
low	55	0.7757841348648071	-2.97368	high	55	0.681346	0.677604	high	55	0.684066	0.806354
low	56	0.7720845341682434	-2.97368	high	56	0.682073	0.677604	high	56	0.691263	0.806354
low	57	0.7684136629104614	-2.97368	high	57	0.682808	0.677604	high	57	0.698462	0.806354
low	58	0.7647832036018372	-2.97368	high	58	0.683561	0.677604	high	58	0.705663	0.806354
low	59	0.7611840963363647	-2.97368	high	59	0.684328	0.677604	high	59	0.712867	0.806354
low	60	0.757625	-2.97368	high	60	0.684705	0.677604	high	60	0.720071	0.806354
low	61	0.7541126012802124	-2.97368	high	61	0.685951	0.677604	high	61	0.727277	0.806354
low	62	0.7506436109542847	-2.97368	high	62	0.686844	0.677604	high	62	0.734484	0.806354
low	63	0.7472072839736938	-2.97368	high	63	0.687259	0.677604	high	63	0.741692	0.806354
low	64	0.743801	-2.97368	high	64	0.687949	0.677604	high	64	0.748902	0.806354
low	65	0.7404303550720215	-2.97368	high	65	0.689424	0.677604	high	65	0.756112	0.806354
low	66	0.7370916604995728	-2.97368	high	66	0.690264	0.677604	high	66	0.763323	0.806354
low	67	0.7337827682495117	-2.97368	high	67	0.691376	0.677604	high	67	0.770535	0.806354
low	68	0.7305065393447876	-2.97368	high	68	0.692979	0.677604	high	68	0.777748	0.806354
low	69	0.7272628545761108	-2.97368	high	69	0.693692	0.677604	high	69	0.784961	0.806354
low	70	0.7240508198738098	-2.97368	high	70	0.695113	0.677604	high	70	0.792175	0.806354
low	71	0.7208718061447144	-2.97368	high	71	0.696754	0.677604	high	71	0.799389	0.806354
low	72	0.7177282571792603	-2.97368	high	72	0.697504	0.677604	high	72	0.806603	0.806354
low	73	0.7146106958389282	-2.97368	high	73	0.699618	0.677604	high	73	0.813819	0.806354
low	74	0.7115301489830017	-2.97368	high	74	0.701141	0.677604	high	74	0.821035	0.806354
low	75	0.7084811329841614	-2.97368	high	75	0.702718	0.677604	high	75	0.82825	0.806354
low	76	0.705467	-2.97368	high	76	0.704378	0.677604	high	76	0.835466	0.806354
low	77	0.7024856209754944	-2.97368	high	77	0.70596	0.677604	high	77	0.842683	0.806354
low	78	0.6995328664779663	-2.97368	high	78	0.707508	0.677604	high	78	0.849899	0.806354
low	79	0.6966161131858826	-2.97368	high	79	0.709828	0.677604	high	79	0.857117	0.806354
low	80	0.6982287168502808	-2.97368	high	80	0.711758	0.677604	high	80	0.861684	0.806354
low	81	0.7044118642807007	-2.97368	high	81	0.71458	0.677604	high	81	0.863602	0.806354
low	82	0.7106614708900452	-2.97368	high	82	0.717117	0.677604	high	82	0.865521	0.806354
low	83	0.7169772386550903	-2.97368	high	83	0.719101	0.677604	high	83	0.86744	0.806354
low	84	0.7233595848083496	-2.97368	high	84	0.721913	0.677604	high	84	0.869361	0.806354
low	85	0.7298115491867065	-2.97368	high	85	0.724773	0.677604	high	85	0.871283	0.806354
low	86	0.7363260984420776	-2.97368	high	86	0.727348	0.677604	high	86	0.873205	0.806354
low	87	0.7429066896438599	-2.97368	high	87	0.729926	0.677604	high	87	0.875129	0.806354
low	88	0.7495529055595398	-2.97368	high	88	0.732511	0.677604	high	88	0.877053	0.806354
low	89	0.7562581896781921	-2.97368	high	89	0.735099	0.677604	high	89	0.87898	0.806354
low	90	0.7630289196968079	-2.97368	high	90	0.737692	0.677604	high	90	0.880906	0.806354
low	91	0.7698624730110168	-2.97368	high	91	0.73975	0.677604	high	91	0.882833	0.806354
low	92	0.7767568826675415	-2.97368	high	92	0.742705	0.677604	high	92	0.884761	0.806354
low	93	0.7837098836898804	-2.97368	high	93	0.745512	0.677604	high	93	0.88669	0.806354
low	94	0.790725	-2.97368	high	94	0.748133	0.677604	high	94	0.88862	0.806354
low	95	0.7978046536445618	-2.97368	high	95	0.750301	0.677604	high	95	0.890551	0.806354
low	96	0.8049468994140625	-2.97368	high	96	0.753318	0.677604	high	96	0.892483	0.806354
low	97	0.8121421933174133	-2.97368	high	97	0.756036	0.677604	high	97	0.894415	0.806354
low	98	0.8193973302841187	-2.97368	high	98	0.75868	0.677604	high	98	0.896348	0.806354
low	99	0.8267215490341187	-2.97368	high	99	0.761327	0.677604	high	99	0.898282	0.806354
low	100	0.8340986371040344	-2.97368	high	100	0.763976	0.677604	high	100	0.900217	0.806354
low	101	0.8415313959121704	-2.97368	high	101	0.766631	0.677604	high	101	0.902153	0.806354
low	102	0.849028	-2.97368	high	102	0.769057	0.677604	high	102	0.90409	0.806354
low	103	0.8565875887870789	-2.97368	high	103	0.771884	0.677604	high	103	0.906027	0.806354
low	104	0.8642023205757141	-2.97368	high	104	0.774637	0.677604	high	104	0.907966	0.806354
low	105	0.871876	-2.97368	high	105	0.777318	0.677604	high	105	0.909905	0.806354
low	106	0.8796131014823914	-2.97368	high	106	0.780003	0.677604	high	106	0.911846	0.806354
low	107	0.8874098062515259	-2.97368	high	107	0.782143	0.677604	high	107	0.913787	0.806354
low	108	0.8952663540840149	-2.97368	high	108	0.784953	0.677604	high	108	0.915728	0.806354
low	109	0.9031838178634644	-2.97368	high	109	0.787921	0.677604	high	109	0.91767	0.806354
low	110	0.9111631512641907	-2.97368	high	110	0.790778	0.677604	high	110	0.919613	0.806354
low	111	0.9192043542861938	-2.97368	high	111	0.793484	0.677604	high	111	0.921558	0.806354
low	112	0.9191425442695618	-2.97368	high	112	0.790613	0.677604	high	112	0.915582	0.806354
low	113	0.9109314680099487	-2.97368	high	113	0.782166	0.677604	high	113	0.901686	0.806354
low	114	0.9027215838432312	-2.97368	high	114	0.773724	0.677604	high	114	0.88779	0.806354
low	115	0.8945120573043823	-2.97368	high	115	0.765285	0.677604	high	115	0.873895	0.806354
low	116	0.8863034248352051	-2.97368	high	116	0.756599	0.677604	high	116	0.859999	0.806354
low	117	0.8780950307846069	-2.97368	high	117	0.748443	0.677604	high	117	0.846104	0.806354
low	118	0.8698873519897461	-2.97368	high	118	0.74004	0.677604	high	118	0.832208	0.806354
low	119	0.8616800308227539	-2.97368	high	119	0.731366	0.677604	high	119	0.818313	0.806354
low	120	0.8534740209579468	-2.97368	high	120	0.723271	0.677604	high	120	0.804418	0.806354
low	121	0.8452690243721008	-2.97368	high	121	0.714907	0.677604	high	121	0.790524	0.806354
low	122	0.8370647430419922	-2.97368	high	122	0.706528	0.677604	high	122	0.776631	0.806354
low	123	0.8288612365722656	-2.97368	high	123	0.698245	0.677604	high	123	0.762737	0.806354
low	124	0.820659	-2.97368	high	124	0.689941	0.677604	high	124	0.748844	0.806354
low	125	0.8124570846557617	-2.97368	high	125	0.681785	0.677604	high	125	0.734952	0.806354
low	126	0.8042560815811157	-2.97368	high	126	0.67366	0.677604	high	126	0.721059	0.806354
low	127	0.796057	-2.97368	high	127	0.665647	0.677604	high	127	0.707168	0.806354
low	128	0.7878597378730774	-2.97368	high	128	0.658311	0.677604	high	128	0.693276	0.806354
low	129	0.779663	-2.97368	high	129	0.650651	0.677604	high	129	0.679385	0.806354
low	130	0.7714681625366211	-2.97368	high	130	0.643546	0.677604	high	130	0.665495	0.806354
low	131	0.7632747888565063	-2.97368	high	131	0.636479	0.677604	high	131	0.651606	0.806354
low	132	0.7550820112228394	-2.97368	high	132	0.629394	0.677604	high	132	0.637717	0.806354
low	133	0.746891	-2.97368	high	133	0.622886	0.677604	high	133	0.623829	0.806354
low	134	0.7387003898620605	-2.97368	high	134	0.616367	0.677604	high	134	0.609941	0.806354
low	135	0.7305120825767517	-2.97368	high	135	0.61025	0.677604	high	135	0.596054	0.806354
low	136	0.722325	-2.97368	high	136	0.60449	0.677604	high	136	0.582169	0.806354
low	137	0.7141400575637817	-2.97368	high	137	0.598989	0.677604	high	137	0.568284	0.806354
low	138	0.7059561014175415	-2.97368	high	138	0.593437	0.677604	high	138	0.554401	0.806354
low	139	0.6977742910385132	-2.97368	high	139	0.588641	0.677604	high	139	0.540519	0.806354
low	140	0.6895946264266968	-2.97368	high	140	0.583921	0.677604	high	140	0.526638	0.806354
low	141	0.6814166307449341	-2.97368	high	141	0.57954	0.677604	high	141	0.512759	0.806354
low	142	0.6732403635978699	-2.97368	high	142	0.575426	0.677604	high	142	0.498881	0.806354
low	143	0.665066	-2.97368	high	143	0.571486	0.677604	high	143	0.485004	0.806354
low	144	0.6609797477722168	-2.97368	high	144	0.5696	0.677604	high	144	0.478066	0.806354
low	145	0.6609797477722168	-2.97368	high	145	0.5696	0.677604	high	145	0.478066	0.806354
low	146	0.6609797477722168	-2.97368	high	146	0.5696	0.677604	high	146	0.478066	0.806354
low	147	0.6609797477722168	-2.97368	high	147	0.5696	0.677604	high	147	0.478066	0.806354
low	148	0.6609797477722168	-2.97368	high	148	0.5696	0.677604	high	148	0.478066	0.806354
low	149	0.6609797477722168	-2.97368	high	149	0.5696	0.677604	high	149	0.478066	0.806354
low	150	0.6609797477722168	-2.97368	high	150	0.5696	0.677604	high	150	0.478066	0.806354
low	151	0.6609797477722168	-2.97368	high	151	0.5696	0.677604	high	151	0.478066	0.806354
low	152	0.6609797477722168	-2.97368	high	152	0.5696	0.677604	high	152	0.478066	0.806354
low	153	0.6609797477722168	-2.97368	high	153	0.5696	0.677604	high	153	0.478066	0.806354
low	154	0.6609797477722168	-2.97368	high	154	0.5696	0.677604	high	154	0.478066	0.806354
low	155	0.6609797477722168	-2.97368	high	155	0.5696	0.677604	high	155	0.478066	0.806354
low	156	0.6609797477722168	-2.97368	high	156	0.5696	0.677604	high	156	0.478066	0.806354
low	157	0.6609797477722168	-2.97368	high	157	0.5696	0.677604	high	157	0.478066	0.806354
low	158	0.6609797477722168	-2.97368	high	158	0.5696	0.677604	high	158	0.478066	0.806354
low	159	0.6609797477722168	-2.97368	high	159	0.5696	0.677604	high	159	0.478066	0.806354
low	0	0.5307854413986206	-2.70777	high	0	0.264744	0.68424	high	0	0.178849	0.578696
low	1	0.5307854413986206	-2.70777	high	1	0.264744	0.68424	high	1	0.178849	0.578696
low	2	0.5307854413986206	-2.70777	high	2	0.264744	0.68424	high	2	0.178849	0.578696
low	3	0.5307854413986206	-2.70777	high	3	0.264744	0.68424	high	3	0.178849	0.578696
low	4	0.5307854413986206	-2.70777	high	4	0.264744	0.68424	high	4	0.178849	0.578696
low	5	0.5307854413986206	-2.70777	high	5	0.264744	0.68424	high	5	0.178849	0.578696
low	6	0.5307854413986206	-2.70777	high	6	0.264744	0.68424	high	6	0.178849	0.578696
low	7	0.5307854413986206	-2.70777	high	7	0.264744	0.68424	high	7	0.178849	0.578696
low	8	0.5307854413986206	-2.70777	high	8	0.264744	0.68424	high	8	0.178849	0.578696
low	9	0.5307854413986206	-2.70777	high	9	0.264744	0.68424	high	9	0.178849	0.578696
low	10	0.5307854413986206	-2.70777	high	10	0.264744	0.68424	high	10	0.178849	0.578696
low	11	0.5307854413986206	-2.70777	high	11	0.264744	0.68424	high	11	0.178849	0.578696
low	12	0.5307854413986206	-2.70777	high	12	0.264744	0.68424	high	12	0.178849	0.578696
low	13	0.5307854413986206	-2.70777	high	13	0.264744	0.68424	high	13	0.178849	0.578696
low	14	0.5307854413986206	-2.70777	high	14	0.264744	0.68424	high	14	0.178849	0.578696
low	15	0.5307854413986206	-2.70777	high	15	0.264744	0.68424	high	15	0.178849	0.578696
low	16	0.5366165637969971	-2.70777	high	16	0.272236	0.68424	high	16	0.185065	0.578696
low	17	0.5482924580574036	-2.70777	high	17	0.287222	0.68424	high	17	0.197497	0.578696
low	18	0.5599837303161621	-2.70777	high	18	0.302201	0.68424	high	18	0.209932	0.578696
low	19	0.5716913938522339	-2.70777	high	19	0.317198	0.68424	high	19	0.222369	0.578696
low	20	0.5834129452705383	-2.70777	high	20	0.332188	0.68424	high	20	0.234808	0.578696
low	21	0.5951495170593262	-2.70777	high	21	0.347178	0.68424	high	21	0.247248	0.578696
low	22	0.6068987846374512	-2.70777	high	22	0.36217	0.68424	high	22	0.259692	0.578696
low	23	0.6186567544937134	-2.70777	high	23	0.377162	0.68424	high	23	0.272137	0.578696
low	24	0.6304263472557068	-2.70777	high	24	0.392155	0.68424	high	24	0.284582	0.578696
low	25	0.6422058939933777	-2.70777	high	25	0.407149	0.68424	high	25	0.297029	0.578696
low	26	0.6539944410324097	-2.70777	high	26	0.422143	0.68424	high	26	0.309476	0.578696
low	27	0.6657922863960266	-2.70777	high	27	0.437137	0.68424	high	27	0.321924	0.578696
low	28	0.6775978207588196	-2.70777	high	28	0.452132	0.68424	high	28	0.334372	0.578696
low	29	0.6894110441207886	-2.70777	high	29	0.467127	0.68424	high	29	0.34682	0.578696
low	30	0.7012317776679993	-2.70777	high	30	0.482123	0.68424	high	30	0.359269	0.578696
low	31	0.7130614519119263	-2.70777	high	31	0.497118	0.68424	high	31	0.371718	0.578696
low	32	0.7248960733413696	-2.70777	high	32	0.512115	0.68424	high	32	0.384168	0.578696
low	33	0.736737	-2.70777	high	33	0.527111	0.68424	high	33	0.396618	0.578696
low	34	0.7485824823379517	-2.70777	high	34	0.542108	0.68424	high	34	0.409068	0.578696
low	35	0.760433	-2.70777	high	35	0.557105	0.68424	high	35	0.421519	0.578696
low	36	0.7722871899604797	-2.70777	high	36	0.572102	0.68424	high	36	0.43397	0.578696
low	37	0.7841452360153198	-2.70777	high	37	0.587099	0.68424	high	37	0.446421	0.578696
low	38	0.7960070371627808	-2.70777	high	38	0.602097	0.68424	high	38	0.458872	0.578696
low	39	0.8078728914260864	-2.70777	high	39	0.617094	0.68424	high	39	0.471323	0.578696
low	40	0.819741	-2.70777	high	40	0.632092	0.68424	high	40	0.483775	0.578696
low	41	0.831612	-2.70777	high	41	0.64709	0.68424	high	41	0.496226	0.578696
low	42	0.8434866666793823	-2.70777	high	42	0.662088	0.68424	high	42	0.508678	0.578696
low	43	0.8553630709648132	-2.70777	high	43	0.677085	0.68424	high	43	0.52113	0.578696
low	44	0.8672409057617188	-2.70777	high	44	0.692083	0.68424	high	44	0.533583	0.578696
low	45	0.8791195750236511	-2.70777	high	45	0.707081	0.68424	high	45	0.546035	0.578696
low	46	0.8909997940063477	-2.70777	high	46	0.72208	0.68424	high	46	0.558487	0.578696
low	47	0.9028828740119934	-2.70777	high	47	0.737078	0.68424	high	47	0.570939	0.578696
low	48	0.9051958918571472	-2.70777	high	48	0.747973	0.68424	high	48	0.582787	0.578696
low	49	0.8979471325874329	-2.70777	high	49	0.754749	0.68424	high	49	0.594029	0.578696
low	50	0.8907096982002258	-2.70777	high	50	0.761564	0.68424	high	50	0.605273	0.578696
low	51	0.8834843635559082	-2.70777	high	51	0.768364	0.68424	high	51	0.616517	0.578696
low	52	0.8762691617012024	-2.70777	high	52	0.775164	0.68424	high	52	0.627761	0.578696
low	53	0.8690677881240845	-2.70777	high	53	0.781968	0.68424	high	53	0.639006	0.578696
low	54	0.8618780374526978	-2.70777	high	54	0.788773	0.68424	high	54	0.650251	0.578696
low	55	0.8547033071517944	-2.70777	high	55	0.79558	0.68424	high	55	0.661496	0.578696
low	56	0.8475416302680969	-2.70777	high	56	0.802388	0.68424	high	56	0.672742	0.578696
low	57	0.8403928875923157	-2.70777	high	57	0.809198	0.68424	high	57	0.683988	0.578696
low	58	0.833257	-2.70777	high	58	0.81601	0.68424	high	58	0.695234	0.578696
low	59	0.8261308670043945	-2.70777	high	59	0.822805	0.68424	high	59	0.706481	0.578696
low	60	0.8190149068832397	-2.70777	high	60	0.829639	0.68424	high	60	0.717728	0.578696
low	61	0.8119115829467773	-2.70777	high	61	0.836457	0.68424	high	61	0.728975	0.578696
low	62	0.8048220872879028	-2.70777	high	62	0.843277	0.68424	high	62	0.740223	0.578696
low	63	0.7977482676506042	-2.70777	high	63	0.850098	0.68424	high	63	0.751471	0.578696
low	64	0.7906851768493652	-2.70777	high	64	0.856921	0.68424	high	64	0.762719	0.578696
low	65	0.7836335897445679	-2.70777	high	65	0.863747	0.68424	high	65	0.773967	0.578696
low	66	0.776596	-2.70777	high	66	0.870574	0.68424	high	66	0.785215	0.578696
low	67	0.7695695757865906	-2.70777	high	67	0.877403	0.68424	high	67	0.796464	0.578696
low	68	0.7625553011894226	-2.70777	high	68	0.884233	0.68424	high	68	0.807713	0.578696
low	69	0.7555534243583679	-2.70777	high	69	0.891065	0.68424	high	69	0.818962	0.578696
low	70	0.7485641241073608	-2.70777	high	70	0.897898	0.68424	high	70	0.830211	0.578696
low	71	0.7415896058082581	-2.70777	high	71	0.904732	0.68424	high	71	0.84146	0.578696
low	72	0.7346248626708984	-2.70777	high	72	0.911548	0.68424	high	72	0.852709	0.578696
low	73	0.7276708483695984	-2.70777	high	73	0.918404	0.68424	high	73	0.863958	0.578696
low	74	0.7207335233688354	-2.70777	high	74	0.925242	0.68424	high	74	0.875208	0.578696
low	75	0.7138075828552246	-2.70777	high	75	0.932081	0.68424	high	75	0.886457	0.578696
low	76	0.7068964242935181	-2.70777	high	76	0.938922	0.68424	high	76	0.897707	0.578696
low	77	0.6999958753585815	-2.70777	high	77	0.945763	0.68424	high	77	0.908958	0.578696
low	78	0.6931108236312866	-2.70777	high	78	0.952606	0.68424	high	78	0.920208	0.578696
low	79	0.6862341165542603	-2.70777	high	79	0.95945	0.68424	high	79	0.931459	0.578696
low	80	0.6841357946395874	-2.70777	high	80	0.958822	0.68424	high	80	0.936859	0.578696
low	81	0.6868085861206055	-2.70777	high	81	0.950724	0.68424	high	81	0.936409	0.578696
low	82	0.6894828081130981	-2.70777	high	82	0.942627	0.68424	high	82	0.935959	0.578696
low	83	0.6921581029891968	-2.70777	high	83	0.934532	0.68424	high	83	0.935509	0.578696
low	84	0.6948350667953491	-2.70777	high	84	0.926439	0.68424	high	84	0.935059	0.578696
low	85	0.6975126266479492	-2.70777	high	85	0.918347	0.68424	high	85	0.934611	0.578696
low	86	0.7001911401748657	-2.70777	high	86	0.910257	0.68424	high	86	0.934162	0.578696
low	87	0.7028721570968628	-2.70777	high	87	0.902169	0.68424	high	87	0.933714	0.578696
low	88	0.7055542469024658	-2.70777	high	88	0.894083	0.68424	high	88	0.933266	0.578696
low	89	0.7082375884056091	-2.70777	high	89	0.885999	0.68424	high	89	0.932819	0.578696
low	90	0.7109228372573853	-2.70777	high	90	0.877916	0.68424	high	90	0.932372	0.578696
low	91	0.7136101722717285	-2.70777	high	91	0.869818	0.68424	high	91	0.931925	0.578696
low	92	0.7162993550300598	-2.70777	high	92	0.861754	0.68424	high	92	0.931479	0.578696
low	93	0.7189907431602478	-2.70777	high	93	0.853674	0.68424	high	93	0.931033	0.578696
low	94	0.7216833233833313	-2.70777	high	94	0.845595	0.68424	high	94	0.930588	0.578696
low	95	0.7243767976760864	-2.70777	high	95	0.837518	0.68424	high	95	0.930144	0.578696
low	96	0.7270718812942505	-2.70777	high	96	0.829442	0.68424	high	96	0.9297	0.578696
low	97	0.7297685742378235	-2.70777	high	97	0.821367	0.68424	high	97	0.929256	0.578696
low	98	0.7324661016464233	-2.70777	high	98	0.813294	0.68424	high	98	0.928813	0.578696
low	99	0.7351657152175903	-2.70777	high	99	0.805223	0.68424	high	99	0.92837	0.578696
low	100	0.7378661036491394	-2.70777	high	100	0.797153	0.68424	high	100	0.927928	0.578696
low	101	0.7405678033828735	-2.70777	high	101	0.789085	0.68424	high	101	0.927486	0.578696
low	102	0.7432708740234375	-2.70777	high	102	0.781018	0.68424	high	102	0.927044	0.578696
low	103	0.7459760904312134	-2.70777	high	103	0.772956	0.68424	high	103	0.926603	0.578696
low	104	0.7486828565597534	-2.70777	high	104	0.764894	0.68424	high	104	0.926162	0.578696
low	105	0.7513912320137024	-2.70777	high	105	0.756835	0.68424	high	105	0.925721	0.578696
low	106	0.7541007995605469	-2.70777	high	106	0.74878	0.68424	high	106	0.925281	0.578696
low	107	0.756812	-2.70777	high	107	0.740725	0.68424	high	107	0.924841	0.578696
low	108	0.7595239281654358	-2.70777	high	108	0.732674	0.68424	high	108	0.924402	0.578696
low	109	0.7622367739677429	-2.70777	high	109	0.724627	0.68424	high	109	0.923963	0.578696
low	110	0.764951	-2.70777	high	110	0.716582	0.68424	high	110	0.923525	0.578696
low	111	0.7676683664321899	-2.70777	high	111	0.70854	0.68424	high	111	0.923088	0.578696
low	112	0.7659178972244263	-2.70777	high	112	0.697732	0.68424	high	112	0.916549	0.578696
low	113	0.7596985101699829	-2.70777	high	113	0.684158	0.68424	high	113	0.903907	0.578696
low	114	0.7534796595573425	-2.70777	high	114	0.670583	0.68424	high	114	0.891265	0.578696
low	115	0.7472617030143738	-2.70777	high	115	0.65701	0.68424	high	115	0.878623	0.578696
low	116	0.7410445213317871	-2.70777	high	116	0.643438	0.68424	high	116	0.865982	0.578696
low	117	0.734828	-2.70777	high	117	0.629866	0.68424	high	117	0.853341	0.578696
low	118	0.7286126017570496	-2.70777	high	118	0.616295	0.68424	high	118	0.840699	0.578696
low	119	0.722399	-2.70777	high	119	0.602725	0.68424	high	119	0.828058	0.578696
low	120	0.7161853909492493	-2.70777	high	120	0.589155	0.68424	high	120	0.815418	0.578696
low	121	0.7099732160568237	-2.70777	high	121	0.575587	0.68424	high	121	0.802777	0.578696
low	122	0.7037619352340698	-2.70777	high	122	0.562019	0.68424	high	122	0.790136	0.578696
low	123	0.6975520253181458	-2.70777	high	123	0.548452	0.68424	high	123	0.777496	0.578696
low	124	0.691343	-2.70777	high	124	0.534877	0.68424	high	124	0.764855	0.578696
low	125	0.6851346492767334	-2.70777	high	125	0.521324	0.68424	high	125	0.752215	0.578696
low	126	0.6789268255233765	-2.70777	high	126	0.507763	0.68424	high	126	0.739576	0.578696
low	127	0.6727196574211121	-2.70777	high	127	0.494203	0.68424	high	127	0.726936	0.578696
low	128	0.6665133833885193	-2.70777	high	128	0.480645	0.68424	high	128	0.714297	0.578696
low	129	0.6603080034255981	-2.70777	high	129	0.467089	0.68424	high	129	0.701658	0.578696
low	130	0.6541034579277039	-2.70777	high	130	0.453536	0.68424	high	130	0.689019	0.578696
low	131	0.6479002833366394	-2.70777	high	131	0.439984	0.68424	high	131	0.67638	0.578696
low	132	0.641698	-2.70777	high	132	0.426435	0.68424	high	132	0.663741	0.578696
low	133	0.6354967951774597	-2.70777	high	133	0.412888	0.68424	high	133	0.651103	0.578696
low	134	0.6292974948883057	-2.70777	high	134	0.399343	0.68424	high	134	0.638465	0.578696
low	135	0.6230993866920471	-2.70777	high	135	0.385801	0.68424	high	135	0.625828	0.578696
low	136	0.616902	-2.70777	high	136	0.372262	0.68424	high	136	0.61319	0.578696
low	137	0.6107059717178345	-2.70777	high	137	0.358728	0.68424	high	137	0.600553	0.578696
low	138	0.6045109033584595	-2.70777	high	138	0.345199	0.68424	high	138	0.587917	0.578696
low	139	0.5983172059059143	-2.70777	high	139	0.331674	0.68424	high	139	0.575281	0.578696
low	140	0.5921251773834229	-2.70777	high	140	0.318155	0.68424	high	140	0.562645	0.578696
low	141	0.5859352946281433	-2.70777	high	141	0.304642	0.68424	high	141	0.550009	0.578696
low	142	0.5797469019889832	-2.70777	high	142	0.291137	0.68424	high	142	0.537375	0.578696
low	143	0.5735601186752319	-2.70777	high	143	0.277643	0.68424	high	143	0.524741	0.578696
low	144	0.5704671740531921	-2.70777	high	144	0.2709	0.68424	high	144	0.518424	0.578696
low	145	0.5704671740531921	-2.70777	high	145	0.2709	0.68424	high	145	0.518424	0.578696
low	146	0.5704671740531921	-2.70777	high	146	0.2709	0.68424	high	146	0.518424	0.578696
low	147	0.5704671740531921	-2.70777	high	147	0.2709	0.68424	high	147	0.518424	0.578696
low	148	0.5704671740531921	-2.70777	high	148	0.2709	0.68424	high	148	0.518424	0.578696
low	149	0.5704671740531921	-2.70777	high	149	0.2709	0.68424	high	149	0.518424	0.578696
low	150	0.5704671740531921	-2.70777	high	150	0.2709	0.68424	high	150	0.518424	0.578696
low	151	0.5704671740531921	-2.70777	high	151	0.2709	0.68424	high	151	0.518424	0.578696
low	152	0.5704671740531921	-2.70777	high	152	0.2709	0.68424	high	152	0.518424	0.578696
low	153	0.5704671740531921	-2.70777	high	153	0.2709	0.68424	high	153	0.518424	0.578696
low	154	0.5704671740531921	-2.70777	high	154	0.2709	0.68424	high	154	0.518424	0.578696
low	155	0.5704671740531921	-2.70777	high	155	0.2709	0.68424	high	155	0.518424	0.578696
low	156	0.5704671740531921	-2.70777	high	156	0.2709	0.68424	high	156	0.518424	0.578696
low	157	0.5704671740531921	-2.70777	high	157	0.2709	0.68424	high	157	0.518424	0.578696
low	158	0.5704671740531921	-2.70777	high	158	0.2709	0.68424	high	158	0.518424	0.578696
low	159	0.5704671740531921	-2.70777	high	159	0.2709	0.68424	high	159	0.518424	0.578696
low	0	0.6677985191345215	-2.95476	high	0	0.520572	0.907137	low	0	0.208042	0.362494
low	1	0.6677985191345215	-2.95476	high	1	0.520572	0.907137	low	1	0.208042	0.362494
low	2	0.6677985191345215	-2.95476	high	2	0.520572	0.907137	low	2	0.208042	0.362494
low	3	0.6677985191345215	-2.95476	high	3	0.520572	0.907137	low	3	0.208042	0.362494
low	4	0.6677985191345215	-2.95476	high	4	0.520572	0.907137	low	4	0.208042	0.362494
low	5	0.6677985191345215	-2.95476	high	5	0.520572	0.907137	low	5	0.208042	0.362494
low	6	0.6677985191345215	-2.95476	high	6	0.520572	0.907137	low	6	0.208042	0.362494
low	7	0.6677985191345215	-2.95476	high	7	0.520572	0.907137	low	7	0.208042	0.362494
low	8	0.6677985191345215	-2.95476	high	8	0.520572	0.907137	low	8	0.208042	0.362494
low	9	0.6677985191345215	-2.95476	high	9	0.520572	0.907137	low	9	0.208042	0.362494
low	10	0.6677985191345215	-2.95476	high	10	0.520572	0.907137	low	10	0.208042	0.362494
low	11	0.6677985191345215	-2.95476	high	11	0.520572	0.907137	low	11	0.208042	0.362494
low	12	0.6677985191345215	-2.95476	high	12	0.520572	0.907137	low	12	0.208042	0.362494
low	13	0.6677985191345215	-2.95476	high	13	0.520572	0.907137	low	13	0.208042	0.362494
low	14	0.6677985191345215	-2.95476	high	14	0.520572	0.907137	low	14	0.208042	0.362494
low	15	0.6677985191345215	-2.95476	high	15	0.520572	0.907137	low	15	0.208042	0.362494
low	16	0.6715157628059387	-2.95476	high	16	0.526493	0.907137	low	16	0.213854	0.362494
low	17	0.6789560914039612	-2.95476	high	17	0.538336	0.907137	low	17	0.225482	0.362494
low	18	0.6864060163497925	-2.95476	high	18	0.550181	0.907137	low	18	0.23711	0.362494
low	19	0.6938614845275879	-2.95476	high	19	0.562028	0.907137	low	19	0.248739	0.362494
low	20	0.701324	-2.95476	high	20	0.573877	0.907137	low	20	0.260369	0.362494
low	21	0.708793	-2.95476	high	21	0.585729	0.907137	low	21	0.272001	0.362494
low	22	0.7162683606147766	-2.95476	high	22	0.597583	0.907137	low	22	0.283633	0.362494
low	23	0.7237491607666016	-2.95476	high	23	0.609436	0.907137	low	23	0.295265	0.362494
low	24	0.7312358021736145	-2.95476	high	24	0.62129	0.907137	low	24	0.306899	0.362494
low	25	0.7387271523475647	-2.95476	high	25	0.633146	0.907137	low	25	0.318532	0.362494
low	26	0.7462247610092163	-2.95476	high	26	0.645004	0.907137	low	26	0.330166	0.362494
low	27	0.7537280321121216	-2.95476	high	27	0.656863	0.907137	low	27	0.3418	0.362494
low	28	0.7612357139587402	-2.95476	high	28	0.668722	0.907137	low	28	0.353434	0.362494
low	29	0.768748	-2.95476	high	29	0.680582	0.907137	low	29	0.365069	0.362494
low	30	0.7762433886528015	-2.95476	high	30	0.692443	0.907137	low	30	0.376704	0.362494
low	31	0.7837898135185242	-2.95476	high	31	0.704304	0.907137	low	31	0.388339	0.362494
low	32	0.791317	-2.95476	high	32	0.716167	0.907137	low	32	0.399974	0.362494
low	33	0.7988469004631042	-2.95476	high	33	0.728031	0.907137	low	33	0.41161	0.362494
low	34	0.8063570261001587	-2.95476	high	34	0.739897	0.907137	low	34	0.423246	0.362494
low	35	0.8139204978942871	-2.95476	high	35	0.751763	0.907137	low	35	0.434883	0.362494
low	36	0.8214653134346008	-2.95476	high	36	0.763631	0.907137	low	36	0.44652	0.362494
low	37	0.8290136456489563	-2.95476	high	37	0.775499	0.907137	low	37	0.458157	0.362494
low	38	0.8365657925605774	-2.95476	high	38	0.787368	0.907137	low	38	0.469794	0.362494
low	39	0.8441217541694641	-2.95476	high	39	0.799238	0.907137	low	39	0.481431	0.362494
low	40	0.8516808748245239	-2.95476	high	40	0.811109	0.907137	low	40	0.493069	0.362494
low	41	0.8592439889907837	-2.95476	high	41	0.822981	0.907137	low	41	0.504706	0.362494
low	42	0.8668111562728882	-2.95476	high	42	0.834855	0.907137	low	42	0.516343	0.362494
low	43	0.8743812441825867	-2.95476	high	43	0.846729	0.907137	low	43	0.527981	0.362494
low	44	0.8819559812545776	-2.95476	high	44	0.858605	0.907137	low	44	0.539618	0.362494
low	45	0.8895352482795715	-2.95476	high	45	0.870481	0.907137	low	45	0.551256	0.362494
low	46	0.8971169590950012	-2.95476	high	46	0.882357	0.907137	low	46	0.562894	0.362494
low	47	0.9047029614448547	-2.95476	high	47	0.894234	0.907137	low	47	0.574532	0.362494
low	48	0.9055309295654297	-2.95476	high	48	0.897061	0.907137	low	48	0.585121	0.362494
low	49	0.8996042013168335	-2.95476	high	49	0.890838	0.907137	low	49	0.594661	0.362494
low	50	0.8936874270439148	-2.95476	high	50	0.884619	0.907137	low	50	0.604202	0.362494
low	51	0.8877763748168945	-2.95476	high	51	0.878403	0.907137	low	51	0.613744	0.362494
low	52	0.8818733096122742	-2.95476	high	52	0.872188	0.907137	low	52	0.623285	0.362494
low	53	0.8759778141975403	-2.95476	high	53	0.865977	0.907137	low	53	0.632827	0.362494
low	54	0.8700904846191406	-2.95476	high	54	0.859769	0.907137	low	54	0.642369	0.362494
low	55	0.8642107844352722	-2.95476	high	55	0.853564	0.907137	low	55	0.651912	0.362494
low	56	0.8583381772041321	-2.95476	high	56	0.847365	0.907137	low	56	0.661455	0.362494
low	57	0.852474	-2.95476	high	57	0.841174	0.907137	low	57	0.670999	0.362494
low	58	0.8466213941574097	-2.95476	high	58	0.834989	0.907137	low	58	0.680543	0.362494
low	59	0.8407813906669617	-2.95476	high	59	0.828808	0.907137	low	59	0.690087	0.362494
low	60	0.8349488973617554	-2.95476	high	60	0.822633	0.907137	low	60	0.699632	0.362494
low	61	0.8291242718696594	-2.95476	high	61	0.81646	0.907137	low	61	0.709176	0.362494
low	62	0.8233095407485962	-2.95476	high	62	0.810292	0.907137	low	62	0.718721	0.362494
low	63	0.817505	-2.95476	high	63	0.804125	0.907137	low	63	0.728266	0.362494
low	64	0.8117080926895142	-2.95476	high	64	0.797964	0.907137	low	64	0.73781	0.362494
low	65	0.8059183955192566	-2.95476	high	65	0.791807	0.907137	low	65	0.747355	0.362494
low	66	0.8001395463943481	-2.95476	high	66	0.785652	0.907137	low	66	0.7569	0.362494
low	67	0.7943695783615112	-2.95476	high	67	0.779501	0.907137	low	67	0.766445	0.362494
low	68	0.788608	-2.95476	high	68	0.773353	0.907137	low	68	0.77599	0.362494
low	69	0.7828549146652222	-2.95476	high	69	0.767211	0.907137	low	69	0.785535	0.362494
low	70	0.7771096229553223	-2.95476	high	70	0.761075	0.907137	low	70	0.795081	0.362494
low	71	0.7713769674301147	-2.95476	high	71	0.754944	0.907137	low	71	0.804626	0.362494
low	72	0.7656594514846802	-2.95476	high	72	0.748818	0.907137	low	72	0.814172	0.362494
low	73	0.7599517703056335	-2.95476	high	73	0.742696	0.907137	low	73	0.823717	0.362494
low	74	0.7542544603347778	-2.95476	high	74	0.73658	0.907137	low	74	0.833263	0.362494
low	75	0.7485649585723877	-2.95476	high	75	0.730468	0.907137	low	75	0.842809	0.362494
low	76	0.7428857684135437	-2.95476	high	76	0.724361	0.907137	low	76	0.852355	0.362494
low	77	0.7372179627418518	-2.95476	high	77	0.718257	0.907137	low	77	0.861901	0.362494
low	78	0.7315576672554016	-2.95476	high	78	0.712157	0.907137	low	78	0.871448	0.362494
low	79	0.7259048223495483	-2.95476	high	79	0.706063	0.907137	low	79	0.880994	0.362494
low	80	0.7241333723068237	-2.95476	high	80	0.705256	0.907137	low	80	0.884945	0.362494
low	81	0.7262545824050903	-2.95476	high	81	0.709735	0.907137	low	81	0.883302	0.362494
low	82	0.7284039258956909	-2.95476	high	82	0.714217	0.907137	low	82	0.881658	0.362494
low	83	0.7305784225463867	-2.95476	high	83	0.718701	0.907137	low	83	0.880014	0.362494
low	84	0.7327777743339539	-2.95476	high	84	0.723189	0.907137	low	84	0.87837	0.362494
low	85	0.7350063323974609	-2.95476	high	85	0.72768	0.907137	low	85	0.876727	0.362494
low	86	0.7372686862945557	-2.95476	high	86	0.732173	0.907137	low	86	0.875083	0.362494
low	87	0.7395644187927246	-2.95476	high	87	0.736671	0.907137	low	87	0.87344	0.362494
low	88	0.7418876886367798	-2.95476	high	88	0.741173	0.907137	low	88	0.871796	0.362494
low	89	0.7442339062690735	-2.95476	high	89	0.745678	0.907137	low	89	0.870153	0.362494
low	90	0.7466091513633728	-2.95476	high	90	0.750185	0.907137	low	90	0.86851	0.362494
low	91	0.7490124106407166	-2.95476	high	91	0.754696	0.907137	low	91	0.866866	0.362494
low	92	0.7514472007751465	-2.95476	high	92	0.759212	0.907137	low	92	0.865223	0.362494
low	93	0.7539138197898865	-2.95476	high	93	0.76373	0.907137	low	93	0.86358	0.362494
low	94	0.7564131617546082	-2.95476	high	94	0.768251	0.907137	low	94	0.861937	0.362494
low	95	0.7589386105537415	-2.95476	high	95	0.772776	0.907137	low	95	0.860294	0.362494
low	96	0.7614924311637878	-2.95476	high	96	0.777305	0.907137	low	96	0.858651	0.362494
low	97	0.7640753388404846	-2.95476	high	97	0.781836	0.907137	low	97	0.857008	0.362494
low	98	0.7666823863983154	-2.95476	high	98	0.78637	0.907137	low	98	0.855365	0.362494
low	99	0.7693229913711548	-2.95476	high	99	0.790906	0.907137	low	99	0.853723	0.362494
low	100	0.7720041275024414	-2.95476	high	100	0.795445	0.907137	low	100	0.85208	0.362494
low	101	0.7747109532356262	-2.95476	high	101	0.799988	0.907137	low	101	0.850437	0.362494
low	102	0.7774385213851929	-2.95476	high	102	0.804534	0.907137	low	102	0.848794	0.362494
low	103	0.780195	-2.95476	high	103	0.809083	0.907137	low	103	0.847152	0.362494
low	104	0.7829830646514893	-2.95476	high	104	0.813634	0.907137	low	104	0.845509	0.362494
low	105	0.785801	-2.95476	high	105	0.818188	0.907137	low	105	0.843867	0.362494
low	106	0.7886520624160767	-2.95476	high	106	0.822748	0.907137	low	106	0.842224	0.362494
low	107	0.7915350198745728	-2.95476	high	107	0.827312	0.907137	low	107	0.840582	0.362494
low	108	0.7944439649581909	-2.95476	high	108	0.831882	0.907137	low	108	0.83894	0.362494
low	109	0.7973777055740356	-2.95476	high	109	0.836453	0.907137	low	109	0.837297	0.362494
low	110	0.8003396987915039	-2.95476	high	110	0.84103	0.907137	low	110	0.835655	0.362494
low	111	0.8033280372619629	-2.95476	high	111	0.845608	0.907137	low	111	0.834013	0.362494
low	112	0.798674	-2.95476	high	112	0.842303	0.907137	low	112	0.82739	0.362494
low	113	0.7863345742225647	-2.95476	high	113	0.831111	0.907137	low	113	0.815786	0.362494
low	114	0.7740387916564941	-2.95476	high	114	0.819919	0.907137	low	114	0.804183	0.362494
low	115	0.7617271542549133	-2.95476	high	115	0.808727	0.907137	low	115	0.792579	0.362494
low	116	0.7494200468063354	-2.95476	high	116	0.797538	0.907137	low	116	0.780975	0.362494
low	117	0.7371166944503784	-2.95476	high	117	0.786349	0.907137	low	117	0.769372	0.362494
low	118	0.7248178720474243	-2.95476	high	118	0.775162	0.907137	low	118	0.757768	0.362494
low	119	0.7125250101089478	-2.95476	high	119	0.763974	0.907137	low	119	0.746165	0.362494
low	120	0.7002377510070801	-2.95476	high	120	0.752787	0.907137	low	120	0.734561	0.362494
low	121	0.6879571676254272	-2.95476	high	121	0.7416	0.907137	low	121	0.722958	0.362494
low	122	0.6756832003593445	-2.95476	high	122	0.730414	0.907137	low	122	0.711354	0.362494
low	123	0.6634184122085571	-2.95476	high	123	0.719231	0.907137	low	123	0.699751	0.362494
low	124	0.6511608362197876	-2.95476	high	124	0.708049	0.907137	low	124	0.688148	0.362494
low	125	0.6389131546020508	-2.95476	high	125	0.696868	0.907137	low	125	0.676544	0.362494
low	126	0.6266703605651855	-2.95476	high	126	0.685688	0.907137	low	126	0.664941	0.362494
low	127	0.6144365668296814	-2.95476	high	127	0.674509	0.907137	low	127	0.653337	0.362494
low	128	0.6022132635116577	-2.95476	high	128	0.663332	0.907137	low	128	0.641734	0.362494
low	129	0.5899962186813354	-2.95476	high	129	0.652157	0.907137	low	129	0.630131	0.362494
low	130	0.5777871012687683	-2.95476	high	130	0.640985	0.907137	low	130	0.618527	0.362494
low	131	0.5655884742736816	-2.95476	high	131	0.629814	0.907137	low	131	0.606924	0.362494
low	132	0.5533987879753113	-2.95476	high	132	0.618645	0.907137	low	132	0.595321	0.362494
low	133	0.5412200689315796	-2.95476	high	133	0.607478	0.907137	low	133	0.583717	0.362494
low	134	0.5290408134460449	-2.95476	high	134	0.596314	0.907137	low	134	0.572114	0.362494
low	135	0.5169039368629456	-2.95476	high	135	0.585151	0.907137	low	135	0.560511	0.362494
low	136	0.5047637820243835	-2.95476	high	136	0.573991	0.907137	low	136	0.548908	0.362494
low	137	0.4926382601261139	-2.95476	high	137	0.562832	0.907137	low	137	0.537304	0.362494
low	138	0.4805236756801605	-2.95476	high	138	0.551675	0.907137	low	138	0.525701	0.362494
low	139	0.46842318773269653	-2.95476	high	139	0.540519	0.907137	low	139	0.514098	0.362494
low	140	0.45633745193481445	-2.95476	high	140	0.529365	0.907137	low	140	0.502494	0.362494
low	141	0.44427061080932617	-2.95476	high	141	0.518213	0.907137	low	141	0.490891	0.362494
low	142	0.4322194457054138	-2.95476	high	142	0.507063	0.907137	low	142	0.479288	0.362494
low	143	0.42018669843673706	-2.95476	high	143	0.495915	0.907137	low	143	0.467685	0.362494
low	144	0.4141765534877777	-2.95476	high	144	0.490342	0.907137	low	144	0.461883	0.362494
low	145	0.4141765534877777	-2.95476	high	145	0.490342	0.907137	low	145	0.461883	0.362494
low	146	0.4141765534877777	-2.95476	high	146	0.490342	0.907137	low	146	0.461883	0.362494
low	147	0.4141765534877777	-2.95476	high	147	0.490342	0.907137	low	147	0.461883	0.362494
low	148	0.4141765534877777	-2.95476	high	148	0.490342	0.907137	low	148	0.461883	0.362494
low	149	0.4141765534877777	-2.95476	high	149	0.490342	0.907137	low	149	0.461883	0.362494
low	150	0.4141765534877777	-2.95476	high	150	0.490342	0.907137	low	150	0.461883	0.362494
low	151	0.4141765534877777	-2.95476	high	151	0.490342	0.907137	low	151	0.461883	0.362494
low	152	0.4141765534877777	-2.95476	high	152	0.490342	0.907137	low	152	0.461883	0.362494
low	153	0.4141765534877777	-2.95476	high	153	0.490342	0.907137	low	153	0.461883	0.362494
low	154	0.4141765534877777	-2.95476	high	154	0.490342	0.907137	low	154	0.461883	0.362494
low	155	0.4141765534877777	-2.95476	high	155	0.490342	0.907137	low	155	0.461883	0.362494
low	156	0.4141765534877777	-2.95476	high	156	0.490342	0.907137	low	156	0.461883	0.362494
low	157	0.4141765534877777	-2.95476	high	157	0.490342	0.907137	low	157	0.461883	0.362494
low	158	0.4141765534877777	-2.95476	high	158	0.490342	0.907137	low	158	0.461883	0.362494
low	159	0.4141765534877777	-2.95476	high	159	0.490342	0.907137	low	159	0.461883	0.362494
low	0	0.6143682599067688	-2.75755	low	0	0.0543379	0.461247	high	0	0.209783	0.523633
low	1	0.6143682599067688	-2.75755	low	1	0.0543379	0.461247	high	1	0.209783	0.523633
low	2	0.6143682599067688	-2.75755	low	2	0.0543379	0.461247	high	2	0.209783	0.523633
low	3	0.6143682599067688	-2.75755	low	3	0.0543379	0.461247	high	3	0.209783	0.523633
low	4	0.6143682599067688	-2.75755	low	4	0.0543379	0.461247	high	4	0.209783	0.523633
low	5	0.6143682599067688	-2.75755	low	5	0.0543379	0.461247	high	5	0.209783	0.523633
low	6	0.6143682599067688	-2.75755	low	6	0.0543379	0.461247	high	6	0.209783	0.523633
low	7	0.6143682599067688	-2.75755	low	7	0.0543379	0.461247	high	7	0.209783	0.523633
low	8	0.6143682599067688	-2.75755	low	8	0.0543379	0.461247	high	8	0.209783	0.523633
low	9	0.6143682599067688	-2.75755	low	9	0.0543379	0.461247	high	9	0.209783	0.523633
low	10	0.6143682599067688	-2.75755	low	10	0.0543379	0.461247	high	10	0.209783	0.523633
low	11	0.6143682599067688	-2.75755	low	11	0.0543379	0.461247	high	11	0.209783	0.523633
low	12	0.6143682599067688	-2.75755	low	12	0.0543379	0.461247	high	12	0.209783	0.523633
low	13	0.6143682599067688	-2.75755	low	13	0.0543379	0.461247	high	13	0.209783	0.523633
low	14	0.6143682599067688	-2.75755	low	14	0.0543379	0.461247	high	14	0.209783	0.523633
low	15	0.6143682599067688	-2.75755	low	15	0.0543379	0.461247	high	15	0.209783	0.523633
low	16	0.6186836957931519	-2.75755	low	16	0.0586484	0.461247	high	16	0.215481	0.523633
low	17	0.6273165941238403	-2.75755	low	17	0.0672833	0.461247	high	17	0.226879	0.523633
low	18	0.6359513998031616	-2.75755	low	18	0.0759309	0.461247	high	18	0.238277	0.523633
low	19	0.6445879340171814	-2.75755	low	19	0.0845878	0.461247	high	19	0.249676	0.523633
low	20	0.6532257199287415	-2.75755	low	20	0.0932502	0.461247	high	20	0.261074	0.523633
low	21	0.6618639826774597	-2.75755	low	21	0.101918	0.461247	high	21	0.272473	0.523633
low	22	0.6705033779144287	-2.75755	low	22	0.11059	0.461247	high	22	0.283872	0.523633
low	23	0.6791445016860962	-2.75755	low	23	0.119264	0.461247	high	23	0.295271	0.523633
low	24	0.6877880096435547	-2.75755	low	24	0.12794	0.461247	high	24	0.30667	0.523633
low	25	0.6964331269264221	-2.75755	low	25	0.136619	0.461247	high	25	0.318069	0.523633
low	26	0.7050794959068298	-2.75755	low	26	0.145298	0.461247	high	26	0.329469	0.523633
low	27	0.7137272357940674	-2.75755	low	27	0.15398	0.461247	high	27	0.340869	0.523633
low	28	0.7223760485649109	-2.75755	low	28	0.162663	0.461247	high	28	0.352269	0.523633
low	29	0.7310259342193604	-2.75755	low	29	0.171347	0.461247	high	29	0.363669	0.523633
low	30	0.739677	-2.75755	low	30	0.180031	0.461247	high	30	0.375069	0.523633
low	31	0.7483292818069458	-2.75755	low	31	0.188716	0.461247	high	31	0.386469	0.523633
low	32	0.7569828033447266	-2.75755	low	32	0.197402	0.461247	high	32	0.397869	0.523633
low	33	0.7656373381614685	-2.75755	low	33	0.206088	0.461247	high	33	0.409269	0.523633
low	34	0.7742923498153687	-2.75755	low	34	0.214775	0.461247	high	34	0.42067	0.523633
low	35	0.7829480171203613	-2.75755	low	35	0.223462	0.461247	high	35	0.43207	0.523633
low	36	0.7916046380996704	-2.75755	low	36	0.23215	0.461247	high	36	0.44347	0.523633
low	37	0.8002620935440063	-2.75755	low	37	0.240838	0.461247	high	37	0.454871	0.523633
low	38	0.8089199066162109	-2.75755	low	38	0.249526	0.461247	high	38	0.466271	0.523633
low	39	0.8175797462463379	-2.75755	low	39	0.258215	0.461247	high	39	0.477672	0.523633
low	40	0.8262408375740051	-2.75755	low	40	0.266904	0.461247	high	40	0.489072	0.523633
low	41	0.8349027633666992	-2.75755	low	41	0.275592	0.461247	high	41	0.500473	0.523633
low	42	0.8435654640197754	-2.75755	low	42	0.284281	0.461247	high	42	0.511874	0.523633
low	43	0.8522283434867859	-2.75755	low	43	0.292971	0.461247	high	43	0.523274	0.523633
low	44	0.8608919382095337	-2.75755	low	44	0.30166	0.461247	high	44	0.534675	0.523633
low	45	0.8695560693740845	-2.75755	low	45	0.31035	0.461247	high	45	0.546076	0.523633
low	46	0.8782206773757935	-2.75755	low	46	0.31904	0.461247	high	46	0.557477	0.523633
low	47	0.8868860006332397	-2.75755	low	47	0.32773	0.461247	high	47	0.568877	0.523633
low	48	0.887767	-2.75755	low	48	0.338166	0.461247	high	48	0.579208	0.523633
low	49	0.8808644413948059	-2.75755	low	49	0.350348	0.461247	high	49	0.58847	0.523633
low	50	0.8739641308784485	-2.75755	low	50	0.362533	0.461247	high	50	0.597731	0.523633
low	51	0.8670648336410522	-2.75755	low	51	0.374719	0.461247	high	51	0.606993	0.523633
low	52	0.8601669073104858	-2.75755	low	52	0.386905	0.461247	high	52	0.616254	0.523633
low	53	0.8532701730728149	-2.75755	low	53	0.399093	0.461247	high	53	0.625516	0.523633
low	54	0.846375	-2.75755	low	54	0.411281	0.461247	high	54	0.634779	0.523633
low	55	0.8394807577133179	-2.75755	low	55	0.423472	0.461247	high	55	0.644041	0.523633
low	56	0.8325889706611633	-2.75755	low	56	0.435662	0.461247	high	56	0.653304	0.523633
low	57	0.8256984949111938	-2.75755	low	57	0.447854	0.461247	high	57	0.662566	0.523633
low	58	0.8188093304634094	-2.75755	low	58	0.460047	0.461247	high	58	0.671828	0.523633
low	59	0.8119214773178101	-2.75755	low	59	0.47224	0.461247	high	59	0.681091	0.523633
low	60	0.8050348162651062	-2.75755	low	60	0.484434	0.461247	high	60	0.690354	0.523633
low	61	0.7981499433517456	-2.75755	low	61	0.496629	0.461247	high	61	0.699617	0.523633
low	62	0.7912663221359253	-2.75755	low	62	0.508825	0.461247	high	62	0.70888	0.523633
low	63	0.7843436598777771	-2.75755	low	63	0.521021	0.461247	high	63	0.718143	0.523633
low	64	0.7775053977966309	-2.75755	low	64	0.533218	0.461247	high	64	0.727406	0.523633
low	65	0.7706290483474731	-2.75755	low	65	0.545415	0.461247	high	65	0.73667	0.523633
low	66	0.7637547254562378	-2.75755	low	66	0.557613	0.461247	high	66	0.745933	0.523633
low	67	0.7568820118904114	-2.75755	low	67	0.569812	0.461247	high	67	0.755197	0.523633
low	68	0.7500107884407043	-2.75755	low	68	0.582011	0.461247	high	68	0.76446	0.523633
low	69	0.7431412935256958	-2.75755	low	69	0.59421	0.461247	high	69	0.773724	0.523633
low	70	0.7362736463546753	-2.75755	low	70	0.606409	0.461247	high	70	0.782987	0.523633
low	71	0.7294085621833801	-2.75755	low	71	0.618609	0.461247	high	71	0.792251	0.523633
low	72	0.7225470542907715	-2.75755	low	72	0.630809	0.461247	high	72	0.801515	0.523633
low	73	0.7156881093978882	-2.75755	low	73	0.643009	0.461247	high	73	0.810778	0.523633
low	74	0.7088315486907959	-2.75755	low	74	0.655209	0.461247	high	74	0.820042	0.523633
low	75	0.7019763588905334	-2.75755	low	75	0.66741	0.461247	high	75	0.829306	0.523633
low	76	0.6951248049736023	-2.75755	low	76	0.67961	0.461247	high	76	0.83857	0.523633
low	77	0.6882766485214233	-2.75755	low	77	0.691811	0.461247	high	77	0.847834	0.523633
low	78	0.6814318299293518	-2.75755	low	78	0.704013	0.461247	high	78	0.857097	0.523633
low	79	0.6745889782905579	-2.75755	low	79	0.716214	0.461247	high	79	0.866361	0.523633
low	80	0.6657105684280396	-2.75755	low	80	0.72479	0.461247	high	80	0.870295	0.523633
low	81	0.6547962427139282	-2.75755	low	81	0.729738	0.461247	high	81	0.868898	0.523633
low	82	0.6438834071159363	-2.75755	low	82	0.734687	0.461247	high	82	0.8675	0.523633
low	83	0.6329723596572876	-2.75755	low	83	0.739638	0.461247	high	83	0.866103	0.523633
low	84	0.6220623254776001	-2.75755	low	84	0.744589	0.461247	high	84	0.864706	0.523633
low	85	0.6111547350883484	-2.75755	low	85	0.74954	0.461247	high	85	0.863309	0.523633
low	86	0.6002498865127563	-2.75755	low	86	0.754492	0.461247	high	86	0.861911	0.523633
low	87	0.5893483757972717	-2.75755	low	87	0.759445	0.461247	high	87	0.860514	0.523633
low	88	0.5784500241279602	-2.75755	low	88	0.764398	0.461247	high	88	0.859118	0.523633
low	89	0.5675541758537292	-2.75755	low	89	0.769352	0.461247	high	89	0.857721	0.523633
low	90	0.55666	-2.75755	low	90	0.774307	0.461247	high	90	0.856324	0.523633
low	91	0.5457693934440613	-2.75755	low	91	0.779263	0.461247	high	91	0.854928	0.523633
low	92	0.5348812937736511	-2.75755	low	92	0.784219	0.461247	high	92	0.853531	0.523633
low	93	0.5239990949630737	-2.75755	low	93	0.789175	0.461247	high	93	0.852135	0.523633
low	94	0.5131217837333679	-2.75755	low	94	0.794133	0.461247	high	94	0.850739	0.523633
low	95	0.5022481679916382	-2.75755	low	95	0.799091	0.461247	high	95	0.849342	0.523633
low	96	0.49137893319129944	-2.75755	low	96	0.80405	0.461247	high	96	0.847946	0.523633
low	97	0.48051372170448303	-2.75755	low	97	0.809009	0.461247	high	97	0.84655	0.523633
low	98	0.46965399384498596	-2.75755	low	98	0.81397	0.461247	high	98	0.845154	0.523633
low	99	0.45879992842674255	-2.75755	low	99	0.818931	0.461247	high	99	0.843758	0.523633
low	100	0.44795408844947815	-2.75755	low	100	0.823892	0.461247	high	100	0.842362	0.523633
low	101	0.43711480498313904	-2.75755	low	101	0.828854	0.461247	high	101	0.840966	0.523633
low	102	0.4262832701206207	-2.75755	low	102	0.833817	0.461247	high	102	0.83957	0.523633
low	103	0.4154616892337799	-2.75755	low	103	0.83878	0.461247	high	103	0.838174	0.523633
low	104	0.4046490788459778	-2.75755	low	104	0.843744	0.461247	high	104	0.836778	0.523633
low	105	0.3938485085964203	-2.75755	low	105	0.848709	0.461247	high	105	0.835382	0.523633
low	106	0.38305965065956116	-2.75755	low	106	0.853675	0.461247	high	106	0.833986	0.523633
low	107	0.3722868859767914	-2.75755	low	107	0.858641	0.461247	high	107	0.83259	0.523633
low	108	0.3615305721759796	-2.75755	low	108	0.863607	0.461247	high	108	0.831195	0.523633
low	109	0.3507936894893646	-2.75755	low	109	0.868573	0.461247	high	109	0.829799	0.523633
low	110	0.3400798439979553	-2.75755	low	110	0.87354	0.461247	high	110	0.828404	0.523633
low	111	0.3293943405151367	-2.75755	low	111	0.878508	0.461247	high	111	0.827008	0.523633
low	112	0.3200649917125702	-2.75755	low	112	0.87595	0.461247	high	112	0.820757	0.523633
low	113	0.3120746314525604	-2.75755	low	113	0.865865	0.461247	high	113	0.809651	0.523633
low	114	0.30408811569213867	-2.75755	low	114	0.855781	0.461247	high	114	0.798545	0.523633
low	115	0.29610615968704224	-2.75755	low	115	0.845698	0.461247	high	115	0.787438	0.523633
low	116	0.28812989592552185	-2.75755	low	116	0.835615	0.461247	high	116	0.776332	0.523633
low	117	0.2801591753959656	-2.75755	low	117	0.825532	0.461247	high	117	0.765226	0.523633
low	118	0.2721942365169525	-2.75755	low	118	0.81545	0.461247	high	118	0.75412	0.523633
low	119	0.2642354965209961	-2.75755	low	119	0.805368	0.461247	high	119	0.743014	0.523633
low	120	0.2562847435474396	-2.75755	low	120	0.795287	0.461247	high	120	0.731909	0.523633
low	121	0.24833296239376068	-2.75755	low	121	0.785206	0.461247	high	121	0.720803	0.523633
low	122	0.2404080182313919	-2.75755	low	122	0.775125	0.461247	high	122	0.709698	0.523633
low	123	0.23248286545276642	-2.75755	low	123	0.765045	0.461247	high	123	0.698592	0.523633
low	124	0.2245689183473587	-2.75755	low	124	0.754922	0.461247	high	124	0.687487	0.523633
low	125	0.21666689217090607	-2.75755	low	125	0.744885	0.461247	high	125	0.676381	0.523633
low	126	0.20877766609191895	-2.75755	low	126	0.734806	0.461247	high	126	0.665276	0.523633
low	127	0.2009030282497406	-2.75755	low	127	0.724727	0.461247	high	127	0.654172	0.523633
low	128	0.19304466247558594	-2.75755	low	128	0.714649	0.461247	high	128	0.643067	0.523633
low	129	0.18520575761795044	-2.75755	low	129	0.704571	0.461247	high	129	0.631963	0.523633
low	130	0.1773872822523117	-2.75755	low	130	0.694493	0.461247	high	130	0.620858	0.523633
low	131	0.16959136724472046	-2.75755	low	131	0.684416	0.461247	high	131	0.609754	0.523633
low	132	0.16182562708854675	-2.75755	low	132	0.674339	0.461247	high	132	0.59865	0.523633
low	133	0.15408886969089508	-2.75755	low	133	0.664263	0.461247	high	133	0.587547	0.523633
low	134	0.1463899314403534	-2.75755	low	134	0.654188	0.461247	high	134	0.576443	0.523633
low	135	0.1387319266796112	-2.75755	low	135	0.644113	0.461247	high	135	0.56534	0.523633
low	136	0.13113121688365936	-2.75755	low	136	0.634038	0.461247	high	136	0.554237	0.523633
low	137	0.12359088659286499	-2.75755	low	137	0.623965	0.461247	high	137	0.543134	0.523633
low	138	0.11619269847869873	-2.75755	low	138	0.613892	0.461247	high	138	0.532031	0.523633
low	139	0.10916183143854141	-2.75755	low	139	0.60382	0.461247	high	139	0.520929	0.523633
low	140	0.10275409370660782	-2.75755	low	140	0.593748	0.461247	high	140	0.509827	0.523633
low	141	0.0970834	-2.75755	low	141	0.583677	0.461247	high	141	0.498725	0.523633
low	142	0.092083	-2.75755	low	142	0.573608	0.461247	high	142	0.487624	0.523633
low	143	0.0876386	-2.75755	low	143	0.563539	0.461247	high	143	0.476523	0.523633
low	144	0.0855705	-2.75755	low	144	0.558506	0.461247	high	144	0.470972	0.523633
low	145	0.0855705	-2.75755	low	145	0.558506	0.461247	high	145	0.470972	0.523633
low	146	0.0855705	-2.75755	low	146	0.558506	0.461247	high	146	0.470972	0.523633
low	147	0.0855705	-2.75755	low	147	0.558506	0.461247	high	147	0.470972	0.523633
low	148	0.0855705	-2.75755	low	148	0.558506	0.461247	high	148	0.470972	0.523633
low	149	0.0855705	-2.75755	low	149	0.558506	0.461247	high	149	0.470972	0.523633
low	150	0.0855705	-2.75755	low	150	0.558506	0.461247	high	150	0.470972	0.523633
low	151	0.0855705	-2.75755	low	151	0.558506	0.461247	high	151	0.470972	0.523633
low	152	0.0855705	-2.75755	low	152	0.558506	0.461247	high	152	0.470972	0.523633
low	153	0.0855705	-2.75755	low	153	0.558506	0.461247	high	153	0.470972	0.523633
low	154	0.0855705	-2.75755	low	154	0.558506	0.461247	high	154	0.470972	0.523633
low	155	0.0855705	-2.75755	low	155	0.558506	0.461247	high	155	0.470972	0.523633
low	156	0.0855705	-2.75755	low	156	0.558506	0.461247	high	156	0.470972	0.523633
low	157	0.0855705	-2.75755	low	157	0.558506	0.461247	high	157	0.470972	0.523633
low	158	0.0855705	-2.75755	low	158	0.558506	0.461247	high	158	0.470972	0.523633
low	159	0.0855705	-2.75755	low	159	0.558506	0.461247	high	159	0.470972	0.523633
low	0	0.3345840573310852	-2.73466	high	0	0.694479	0.789211	high	0	0.248002	0.791407
low	1	0.3345840573310852	-2.73466	high	1	0.694479	0.789211	high	1	0.248002	0.791407
low	2	0.3345840573310852	-2.73466	high	2	0.694479	0.789211	high	2	0.248002	0.791407
low	3	0.3345840573310852	-2.73466	high	3	0.694479	0.789211	high	3	0.248002	0.791407
low	4	0.3345840573310852	-2.73466	high	4	0.694479	0.789211	high	4	0.248002	0.791407
low	5	0.3345840573310852	-2.73466	high	5	0.694479	0.789211	high	5	0.248002	0.791407
low	6	0.3345840573310852	-2.73466	high	6	0.694479	0.789211	high	6	0.248002	0.791407
low	7	0.3345840573310852	-2.73466	high	7	0.694479	0.789211	high	7	0.248002	0.791407
low	8	0.3345840573310852	-2.73466	high	8	0.694479	0.789211	high	8	0.248002	0.791407
low	9	0.3345840573310852	-2.73466	high	9	0.694479	0.789211	high	9	0.248002	0.791407
low	10	0.3345840573310852	-2.73466	high	10	0.694479	0.789211	high	10	0.248002	0.791407
low	11	0.3345840573310852	-2.73466	high	11	0.694479	0.789211	high	11	0.248002	0.791407
low	12	0.3345840573310852	-2.73466	high	12	0.694479	0.789211	high	12	0.248002	0.791407
low	13	0.3345840573310852	-2.73466	high	13	0.694479	0.789211	high	13	0.248002	0.791407
low	14	0.3345840573310852	-2.73466	high	14	0.694479	0.789211	high	14	0.248002	0.791407
low	15	0.3345840573310852	-2.73466	high	15	0.694479	0.789211	high	15	0.248002	0.791407
low	16	0.340839	-2.73466	high	16	0.697788	0.789211	high	16	0.254272	0.791407
low	17	0.35334843397140503	-2.73466	high	17	0.704933	0.789211	high	17	0.266825	0.791407
low	18	0.36585837602615356	-2.73466	high	18	0.711942	0.789211	high	18	0.279398	0.791407
low	19	0.3783688545227051	-2.73466	high	19	0.718993	0.789211	high	19	0.291985	0.791407
low	20	0.3908797800540924	-2.73466	high	20	0.725983	0.789211	high	20	0.304587	0.791407
low	21	0.40339088439941406	-2.73466	high	21	0.733202	0.789211	high	21	0.317202	0.791407
low	22	0.41590213775634766	-2.73466	high	22	0.740144	0.789211	high	22	0.329827	0.791407
low	23	0.4284137189388275	-2.73466	high	23	0.747442	0.789211	high	23	0.342463	0.791407
low	24	0.4409256875514984	-2.73466	high	24	0.754822	0.789211	high	24	0.355108	0.791407
low	25	0.4534378945827484	-2.73466	high	25	0.762118	0.789211	high	25	0.367761	0.791407
low	26	0.4659503102302551	-2.73466	high	26	0.769452	0.789211	high	26	0.380421	0.791407
low	27	0.4784628748893738	-2.73466	high	27	0.77682	0.789211	high	27	0.393088	0.791407
low	28	0.49097567796707153	-2.73466	high	28	0.78423	0.789211	high	28	0.405762	0.791407
low	29	0.5034886598587036	-2.73466	high	29	0.791588	0.789211	high	29	0.41844	0.791407
low	30	0.5160015821456909	-2.73466	high	30	0.799017	0.789211	high	30	0.431124	0.791407
low	31	0.5285145044326782	-2.73466	high	31	0.806661	0.789211	high	31	0.443813	0.791407
low	32	0.5410276651382446	-2.73466	high	32	0.814206	0.789211	high	32	0.456507	0.791407
low	33	0.5535408854484558	-2.73466	high	33	0.821779	0.789211	high	33	0.469204	0.791407
low	34	0.5660542249679565	-2.73466	high	34	0.829374	0.789211	high	34	0.481905	0.791407
low	35	0.5785678029060364	-2.73466	high	35	0.83698	0.789211	high	35	0.494608	0.791407
low	36	0.5910618901252747	-2.73466	high	36	0.844335	0.789211	high	36	0.507315	0.791407
low	37	0.6035952568054199	-2.73466	high	37	0.852217	0.789211	high	37	0.520025	0.791407
low	38	0.6161091923713684	-2.73466	high	38	0.859733	0.789211	high	38	0.532739	0.791407
low	39	0.6286232471466064	-2.73466	high	39	0.867495	0.789211	high	39	0.545456	0.791407
low	40	0.6411373615264893	-2.73466	high	40	0.874953	0.789211	high	40	0.558176	0.791407
low	41	0.6536515355110168	-2.73466	high	41	0.882797	0.789211	high	41	0.570898	0.791407
low	42	0.6661657094955444	-2.73466	high	42	0.89046	0.789211	high	42	0.583621	0.791407
low	43	0.6786802411079407	-2.73466	high	43	0.898128	0.789211	high	43	0.596346	0.791407
low	44	0.6911946535110474	-2.73466	high	44	0.905802	0.789211	high	44	0.609073	0.791407
low	45	0.7037091255187988	-2.73466	high	45	0.91348	0.789211	high	45	0.621801	0.791407
low	46	0.7162237167358398	-2.73466	high	46	0.921019	0.789211	high	46	0.634531	0.791407
low	47	0.7287384271621704	-2.73466	high	47	0.928851	0.789211	high	47	0.647263	0.791407
low	48	0.7383543252944946	-2.73466	high	48	0.929345	0.789211	high	48	0.657015	0.791407
low	49	0.7450711131095886	-2.73466	high	49	0.923019	0.789211	high	49	0.663789	0.791407
low	50	0.7517881989479065	-2.73466	high	50	0.916712	0.789211	high	50	0.670567	0.791407
low	51	0.7585052847862244	-2.73466	high	51	0.910343	0.789211	high	51	0.677347	0.791407
low	52	0.7652226686477661	-2.73466	high	52	0.903992	0.789211	high	52	0.684129	0.791407
low	53	0.7719401121139526	-2.73466	high	53	0.897474	0.789211	high	53	0.690915	0.791407
low	54	0.7786577343940735	-2.73466	high	54	0.89118	0.789211	high	54	0.697705	0.791407
low	55	0.7853754758834839	-2.73466	high	55	0.88506	0.789211	high	55	0.704497	0.791407
low	56	0.7920933961868286	-2.73466	high	56	0.878744	0.789211	high	56	0.711292	0.791407
low	57	0.7988116145133972	-2.73466	high	57	0.872544	0.789211	high	57	0.718088	0.791407
low	58	0.80553	-2.73466	high	58	0.866296	0.789211	high	58	0.724887	0.791407
low	59	0.8122480511665344	-2.73466	high	59	0.859957	0.789211	high	59	0.731688	0.791407
low	60	0.8189665079116821	-2.73466	high	60	0.853864	0.789211	high	60	0.738491	0.791407
low	61	0.8256850242614746	-2.73466	high	61	0.847689	0.789211	high	61	0.745296	0.791407
low	62	0.8324035406112671	-2.73466	high	62	0.841536	0.789211	high	62	0.752104	0.791407
low	63	0.8391221761703491	-2.73466	high	63	0.835406	0.789211	high	63	0.758915	0.791407
low	64	0.8458407521247864	-2.73466	high	64	0.829297	0.789211	high	64	0.765728	0.791407
low	65	0.8525596857070923	-2.73466	high	65	0.823233	0.789211	high	65	0.772542	0.791407
low	66	0.8592785596847534	-2.73466	high	66	0.817005	0.789211	high	66	0.779359	0.791407
low	67	0.8659976124763489	-2.73466	high	67	0.811155	0.789211	high	67	0.786176	0.791407
low	68	0.8727166056632996	-2.73466	high	68	0.805244	0.789211	high	68	0.792996	0.791407
low	69	0.8794355392456055	-2.73466	high	69	0.799091	0.789211	high	69	0.799817	0.791407
low	70	0.886155	-2.73466	high	70	0.793312	0.789211	high	70	0.80664	0.791407
low	71	0.8928741216659546	-2.73466	high	71	0.787449	0.789211	high	71	0.813464	0.791407
low	72	0.8995935320854187	-2.73466	high	72	0.781511	0.789211	high	72	0.820289	0.791407
low	73	0.9063128232955933	-2.73466	high	73	0.775684	0.789211	high	73	0.827117	0.791407
low	74	0.9130323529243469	-2.73466	high	74	0.769823	0.789211	high	74	0.833947	0.791407
low	75	0.9197519421577454	-2.73466	high	75	0.763981	0.789211	high	75	0.840779	0.791407
low	76	0.9264717102050781	-2.73466	high	76	0.758153	0.789211	high	76	0.847612	0.791407
low	77	0.9331915974617004	-2.73466	high	77	0.752332	0.789211	high	77	0.854446	0.791407
low	78	0.9399114847183228	-2.73466	high	78	0.746499	0.789211	high	78	0.86128	0.791407
low	79	0.9466314315795898	-2.73466	high	79	0.740503	0.789211	high	79	0.868116	0.791407
low	80	0.9468635320663452	-2.73466	high	80	0.740672	0.789211	high	80	0.86892	0.791407
low	81	0.9406083822250366	-2.73466	high	81	0.746354	0.789211	high	81	0.86369	0.791407
low	82	0.9343533515930176	-2.73466	high	82	0.752073	0.789211	high	82	0.858461	0.791407
low	83	0.9280984997749329	-2.73466	high	83	0.757814	0.789211	high	83	0.853232	0.791407
low	84	0.9218438863754272	-2.73466	high	84	0.763666	0.789211	high	84	0.848004	0.791407
low	85	0.9155896902084351	-2.73466	high	85	0.769528	0.789211	high	85	0.842777	0.791407
low	86	0.9093354940414429	-2.73466	high	86	0.775443	0.789211	high	86	0.83755	0.791407
low	87	0.9030812978744507	-2.73466	high	87	0.781419	0.789211	high	87	0.832324	0.791407
low	88	0.8968273997306824	-2.73466	high	88	0.787454	0.789211	high	88	0.827098	0.791407
low	89	0.8905736804008484	-2.73466	high	89	0.793578	0.789211	high	89	0.821873	0.791407
low	90	0.8843202590942383	-2.73466	high	90	0.799608	0.789211	high	90	0.816648	0.791407
low	91	0.8780671954154968	-2.73466	high	91	0.805967	0.789211	high	91	0.811425	0.791407
low	92	0.8718145489692688	-2.73466	high	92	0.812271	0.789211	high	92	0.806203	0.791407
low	93	0.8655620813369751	-2.73466	high	93	0.818609	0.789211	high	93	0.800981	0.791407
low	94	0.85931	-2.73466	high	94	0.824971	0.789211	high	94	0.79576	0.791407
low	95	0.8530582189559937	-2.73466	high	95	0.831371	0.789211	high	95	0.790541	0.791407
low	96	0.8468068838119507	-2.73466	high	96	0.837752	0.789211	high	96	0.785322	0.791407
low	97	0.8405557870864868	-2.73466	high	97	0.844359	0.789211	high	97	0.780103	0.791407
low	98	0.8343052864074707	-2.73466	high	98	0.850927	0.789211	high	98	0.774885	0.791407
low	99	0.828055	-2.73466	high	99	0.857541	0.789211	high	99	0.769667	0.791407
low	100	0.8218053579330444	-2.73466	high	100	0.86418	0.789211	high	100	0.76445	0.791407
low	101	0.815556	-2.73466	high	101	0.870857	0.789211	high	101	0.759235	0.791407
low	102	0.8093067407608032	-2.73466	high	102	0.877445	0.789211	high	102	0.75402	0.791407
low	103	0.8030580282211304	-2.73466	high	103	0.884343	0.789211	high	103	0.748806	0.791407
low	104	0.7968097925186157	-2.73466	high	104	0.891253	0.789211	high	104	0.743594	0.791407
low	105	0.7905619740486145	-2.73466	high	105	0.898142	0.789211	high	105	0.738382	0.791407
low	106	0.7843146920204163	-2.73466	high	106	0.904988	0.789211	high	106	0.733171	0.791407
low	107	0.7780680656433105	-2.73466	high	107	0.912013	0.789211	high	107	0.727961	0.791407
low	108	0.7718216776847839	-2.73466	high	108	0.919158	0.789211	high	108	0.722753	0.791407
low	109	0.7655755877494812	-2.73466	high	109	0.926296	0.789211	high	109	0.717545	0.791407
low	110	0.7593297958374023	-2.73466	high	110	0.933303	0.789211	high	110	0.712339	0.791407
low	111	0.7530842423439026	-2.73466	high	111	0.940803	0.789211	high	111	0.707134	0.791407
low	112	0.7436537742614746	-2.73466	high	112	0.942258	0.789211	high	112	0.698013	0.791407
low	113	0.7310383319854736	-2.73466	high	113	0.937809	0.789211	high	113	0.684976	0.791407
low	114	0.7184229493141174	-2.73466	high	114	0.933443	0.789211	high	114	0.671939	0.791407
low	115	0.7058075666427612	-2.73466	high	115	0.929164	0.789211	high	115	0.658903	0.791407
low	116	0.6931923627853394	-2.73466	high	116	0.92487	0.789211	high	116	0.645867	0.791407
low	117	0.6805771589279175	-2.73466	high	117	0.920573	0.789211	high	117	0.632832	0.791407
low	118	0.6679619550704956	-2.73466	high	118	0.916367	0.789211	high	118	0.619798	0.791407
low	119	0.6553471088409424	-2.73466	high	119	0.91219	0.789211	high	119	0.606764	0.791407
low	120	0.642733	-2.73466	high	120	0.908006	0.789211	high	120	0.593731	0.791407
low	121	0.6301180720329285	-2.73466	high	121	0.903994	0.789211	high	121	0.580698	0.791407
low	122	0.6175039410591125	-2.73466	high	122	0.899843	0.789211	high	122	0.567666	0.791407
low	123	0.60489	-2.73466	high	123	0.896022	0.789211	high	123	0.554636	0.791407
low	124	0.5922763347625732	-2.73466	high	124	0.892118	0.789211	high	124	0.541608	0.791407
low	125	0.5796629190444946	-2.73466	high	125	0.888275	0.789211	high	125	0.528581	0.791407
low	126	0.5670496821403503	-2.73466	high	126	0.884511	0.789211	high	126	0.515555	0.791407
low	127	0.5544368624687195	-2.73466	high	127	0.880807	0.789211	high	127	0.502531	0.791407
low	128	0.541824	-2.73466	high	128	0.876883	0.789211	high	128	0.489509	0.791407
low	129	0.5292121171951294	-2.73466	high	129	0.873637	0.789211	high	129	0.476488	0.791407
low	130	0.5166004300117493	-2.73466	high	130	0.870167	0.789211	high	130	0.463469	0.791407
low	131	0.5039891600608826	-2.73466	high	131	0.866768	0.789211	high	131	0.450452	0.791407
low	132	0.49137821793556213	-2.73466	high	132	0.863432	0.789211	high	132	0.437436	0.791407
low	133	0.4787675738334656	-2.73466	high	133	0.8602	0.789211	high	133	0.424422	0.791407
low	134	0.4661571979522705	-2.73466	high	134	0.857035	0.789211	high	134	0.411411	0.791407
low	135	0.45354732871055603	-2.73466	high	135	0.85395	0.789211	high	135	0.398401	0.791407
low	136	0.44093751907348633	-2.73466	high	136	0.850778	0.789211	high	136	0.385395	0.791407
low	137	0.42832812666893005	-2.73466	high	137	0.848082	0.789211	high	137	0.372369	0.791407
low	138	0.4157189428806305	-2.73466	high	138	0.845274	0.789211	high	138	0.359394	0.791407
low	139	0.4031100273132324	-2.73466	high	139	0.842521	0.789211	high	139	0.346399	0.791407
low	140	0.390502	-2.73466	high	140	0.839849	0.789211	high	140	0.333407	0.791407
low	141	0.3778950273990631	-2.73466	high	141	0.837243	0.789211	high	141	0.320419	0.791407
low	142	0.36528950929641724	-2.73466	high	142	0.834714	0.789211	high	142	0.307436	0.791407
low	143	0.3526850938796997	-2.73466	high	143	0.832253	0.789211	high	143	0.29446	0.791407
low	144	0.34638315439224243	-2.73466	high	144	0.831052	0.789211	high	144	0.287974	0.791407
low	145	0.34638315439224243	-2.73466	high	145	0.831052	0.789211	high	145	0.287974	0.791407
low	146	0.34638315439224243	-2.73466	high	146	0.831052	0.789211	high	146	0.287974	0.791407
low	147	0.34638315439224243	-2.73466	high	147	0.831052	0.789211	high	147	0.287974	0.791407
low	148	0.34638315439224243	-2.73466	high	148	0.831052	0.789211	high	148	0.287974	0.791407
low	149	0.34638315439224243	-2.73466	high	149	0.831052	0.789211	high	149	0.287974	0.791407
low	150	0.34638315439224243	-2.73466	high	150	0.831052	0.789211	high	150	0.287974	0.791407
low	151	0.34638315439224243	-2.73466	high	151	0.831052	0.789211	high	151	0.287974	0.791407
low	152	0.34638315439224243	-2.73466	high	152	0.831052	0.789211	high	152	0.287974	0.791407
low	153	0.34638315439224243	-2.73466	high	153	0.831052	0.789211	high	153	0.287974	0.791407
low	154	0.34638315439224243	-2.73466	high	154	0.831052	0.789211	high	154	0.287974	0.791407
low	155	0.34638315439224243	-2.73466	high	155	0.831052	0.789211	high	155	0.287974	0.791407
low	156	0.34638315439224243	-2.73466	high	156	0.831052	0.789211	high	156	0.287974	0.791407
low	157	0.34638315439224243	-2.73466	high	157	0.831052	0.789211	high	157	0.287974	0.791407
low	158	0.34638315439224243	-2.73466	high	158	0.831052	0.789211	high	158	0.287974	0.791407
low	159	0.34638315439224243	-2.73466	high	159	0.831052	0.789211	high	159	0.287974	0.791407
low	0	0	-2.45317	high	0	0.486108	0.793721	high	0	0.368862	0.692746
low	1	0	-2.45317	high	1	0.486108	0.793721	high	1	0.368862	0.692746
low	2	0	-2.45317	high	2	0.486108	0.793721	high	2	0.368862	0.692746
low	3	0	-2.45317	high	3	0.486108	0.793721	high	3	0.368862	0.692746
low	4	0	-2.45317	high	4	0.486108	0.793721	high	4	0.368862	0.692746
low	5	0	-2.45317	high	5	0.486108	0.793721	high	5	0.368862	0.692746
low	6	0	-2.45317	high	6	0.486108	0.793721	high	6	0.368862	0.692746
low	7	0	-2.45317	high	7	0.486108	0.793721	high	7	0.368862	0.692746
low	8	0	-2.45317	high	8	0.486108	0.793721	high	8	0.368862	0.692746
low	9	0	-2.45317	high	9	0.486108	0.793721	high	9	0.368862	0.692746
low	10	0	-2.45317	high	10	0.486108	0.793721	high	10	0.368862	0.692746
low	11	0	-2.45317	high	11	0.486108	0.793721	high	11	0.368862	0.692746
low	12	0	-2.45317	high	12	0.486108	0.793721	high	12	0.368862	0.692746
low	13	0	-2.45317	high	13	0.486108	0.793721	high	13	0.368862	0.692746
low	14	0	-2.45317	high	14	0.486108	0.793721	high	14	0.368862	0.692746
low	15	0	-2.45317	high	15	0.486108	0.793721	high	15	0.368862	0.692746
low	16	0.00473495	-2.45317	high	16	0.492454	0.793721	high	16	0.374955	0.692746
low	17	0.014204852283000946	-2.45317	high	17	0.505146	0.793721	high	17	0.38715	0.692746
low	18	0.023674752563238144	-2.45317	high	18	0.517841	0.793721	high	18	0.399353	0.692746
low	19	0.0331447	-2.45317	high	19	0.530537	0.793721	high	19	0.411565	0.692746
low	20	0.0426146	-2.45317	high	20	0.543235	0.793721	high	20	0.423786	0.692746
low	21	0.052084457129240036	-2.45317	high	21	0.555934	0.793721	high	21	0.436015	0.692746
low	22	0.0615544	-2.45317	high	22	0.568634	0.793721	high	22	0.448247	0.692746
low	23	0.0710243	-2.45317	high	23	0.581336	0.793721	high	23	0.460484	0.692746
low	24	0.0804942	-2.45317	high	24	0.594037	0.793721	high	24	0.472727	0.692746
low	25	0.0899641	-2.45317	high	25	0.60674	0.793721	high	25	0.484977	0.692746
low	26	0.099434	-2.45317	high	26	0.619444	0.793721	high	26	0.497229	0.692746
low	27	0.10890386998653412	-2.45317	high	27	0.632148	0.793721	high	27	0.509485	0.692746
low	28	0.11837377399206161	-2.45317	high	28	0.644854	0.793721	high	28	0.521743	0.692746
low	29	0.1278436779975891	-2.45317	high	29	0.65756	0.793721	high	29	0.534005	0.692746
low	30	0.137314	-2.45317	high	30	0.670268	0.793721	high	30	0.546269	0.692746
low	31	0.1467834860086441	-2.45317	high	31	0.682976	0.793721	high	31	0.558534	0.692746
low	32	0.156253	-2.45317	high	32	0.695687	0.793721	high	32	0.570801	0.692746
low	33	0.1657232791185379	-2.45317	high	33	0.708398	0.793721	high	33	0.583072	0.692746
low	34	0.175193	-2.45317	high	34	0.72111	0.793721	high	34	0.595345	0.692746
low	35	0.1846630871295929	-2.45317	high	35	0.733823	0.793721	high	35	0.60762	0.692746
low	36	0.194133	-2.45317	high	36	0.746538	0.793721	high	36	0.619897	0.692746
low	37	0.2036028802394867	-2.45317	high	37	0.759253	0.793721	high	37	0.632174	0.692746
low	38	0.21307280659675598	-2.45317	high	38	0.77197	0.793721	high	38	0.644455	0.692746
low	39	0.22254271805286407	-2.45317	high	39	0.784689	0.793721	high	39	0.656736	0.692746
low	40	0.23201259970664978	-2.45317	high	40	0.797408	0.793721	high	40	0.669019	0.692746
low	41	0.24148249626159668	-2.45317	high	41	0.810127	0.793721	high	41	0.681302	0.692746
low	42	0.25095242261886597	-2.45317	high	42	0.822847	0.793721	high	42	0.693586	0.692746
low	43	0.26042231917381287	-2.45317	high	43	0.835568	0.793721	high	43	0.70587	0.692746
low	44	0.26989221572875977	-2.45317	high	44	0.848289	0.793721	high	44	0.718155	0.692746
low	45	0.27936211228370667	-2.45317	high	45	0.861011	0.793721	high	45	0.730441	0.692746
low	46	0.28883200883865356	-2.45317	high	46	0.873732	0.793721	high	46	0.742729	0.692746
low	47	0.29830190539360046	-2.45317	high	47	0.886455	0.793721	high	47	0.755017	0.692746
low	48	0.3115520477294922	-2.45317	high	48	0.889632	0.793721	high	48	0.763059	0.692746
low	49	0.3285861909389496	-2.45317	high	49	0.883265	0.793721	high	49	0.766856	0.692746
low	50	0.3456264138221741	-2.45317	high	50	0.876903	0.793721	high	50	0.770657	0.692746
low	51	0.3626701533794403	-2.45317	high	51	0.870543	0.793721	high	51	0.774463	0.692746
low	52	0.379716	-2.45317	high	52	0.864187	0.793721	high	52	0.778272	0.692746
low	53	0.39676418900489807	-2.45317	high	53	0.857836	0.793721	high	53	0.782083	0.692746
low	54	0.41381627321243286	-2.45317	high	54	0.851491	0.793721	high	54	0.785897	0.692746
low	55	0.4308702349662781	-2.45317	high	55	0.84515	0.793721	high	55	0.789713	0.692746
low	56	0.44792693853378296	-2.45317	high	56	0.838812	0.793721	high	56	0.793535	0.692746
low	57	0.46498775482177734	-2.45317	high	57	0.832478	0.793721	high	57	0.797362	0.692746
low	58	0.4820517599582672	-2.45317	high	58	0.826149	0.793721	high	58	0.801193	0.692746
low	59	0.4991186261177063	-2.45317	high	59	0.819825	0.793721	high	59	0.805026	0.692746
low	60	0.5161874890327454	-2.45317	high	60	0.813505	0.793721	high	60	0.808862	0.692746
low	61	0.533257	-2.45317	high	61	0.807187	0.793721	high	61	0.812699	0.692746
low	62	0.5503279566764832	-2.45317	high	62	0.800872	0.793721	high	62	0.81654	0.692746
low	63	0.567402	-2.45317	high	63	0.794561	0.793721	high	63	0.820383	0.692746
low	64	0.5844780206680298	-2.45317	high	64	0.788254	0.793721	high	64	0.824229	0.692746
low	65	0.6015545129776001	-2.45317	high	65	0.781955	0.793721	high	65	0.828075	0.692746
low	66	0.6186329126358032	-2.45317	high	66	0.775662	0.793721	high	66	0.831924	0.692746
low	67	0.6357135772705078	-2.45317	high	67	0.769375	0.793721	high	67	0.835777	0.692746
low	68	0.6527950167655945	-2.45317	high	68	0.76309	0.793721	high	68	0.839633	0.692746
low	69	0.6698777079582214	-2.45317	high	69	0.756809	0.793721	high	69	0.843492	0.692746
low	70	0.686962	-2.45317	high	70	0.75053	0.793721	high	70	0.847354	0.692746
low	71	0.7040477395057678	-2.45317	high	71	0.744254	0.793721	high	71	0.851218	0.692746
low	72	0.7211349606513977	-2.45317	high	72	0.737984	0.793721	high	72	0.855084	0.692746
low	73	0.7382229566574097	-2.45317	high	73	0.731719	0.793721	high	73	0.858952	0.692746
low	74	0.7553122639656067	-2.45317	high	74	0.72546	0.793721	high	74	0.86282	0.692746
low	75	0.7724030017852783	-2.45317	high	75	0.719206	0.793721	high	75	0.866691	0.692746
low	76	0.7894948720932007	-2.45317	high	76	0.712958	0.793721	high	76	0.870564	0.692746
low	77	0.8065875768661499	-2.45317	high	77	0.706716	0.793721	high	77	0.874438	0.692746
low	78	0.8236814737319946	-2.45317	high	78	0.700478	0.793721	high	78	0.878314	0.692746
low	79	0.8407769203186035	-2.45317	high	79	0.694244	0.793721	high	79	0.882192	0.692746
low	80	0.8490096926689148	-2.45317	high	80	0.693421	0.793721	high	80	0.88034	0.692746
low	81	0.8483837842941284	-2.45317	high	81	0.69801	0.793721	high	81	0.872759	0.692746
low	82	0.8477621078491211	-2.45317	high	82	0.702602	0.793721	high	82	0.865178	0.692746
low	83	0.8471479415893555	-2.45317	high	83	0.707197	0.793721	high	83	0.857597	0.692746
low	84	0.8465398550033569	-2.45317	high	84	0.711797	0.793721	high	84	0.850017	0.692746
low	85	0.845934	-2.45317	high	85	0.7164	0.793721	high	85	0.842438	0.692746
low	86	0.8453350067138672	-2.45317	high	86	0.721009	0.793721	high	86	0.834859	0.692746
low	87	0.8447413444519043	-2.45317	high	87	0.725621	0.793721	high	87	0.827282	0.692746
low	88	0.8441516757011414	-2.45317	high	88	0.730237	0.793721	high	88	0.819705	0.692746
low	89	0.8435665369033813	-2.45317	high	89	0.734857	0.793721	high	89	0.812128	0.692746
low	90	0.8429884910583496	-2.45317	high	90	0.739482	0.793721	high	90	0.804552	0.692746
low	91	0.8424133062362671	-2.45317	high	91	0.744109	0.793721	high	91	0.796977	0.692746
low	92	0.8418428301811218	-2.45317	high	92	0.748739	0.793721	high	92	0.789403	0.692746
low	93	0.8412779569625854	-2.45317	high	93	0.753371	0.793721	high	93	0.78183	0.692746
low	94	0.8407188653945923	-2.45317	high	94	0.758007	0.793721	high	94	0.774258	0.692746
low	95	0.8401634097099304	-2.45317	high	95	0.762647	0.793721	high	95	0.766687	0.692746
low	96	0.8396116495132446	-2.45317	high	96	0.76729	0.793721	high	96	0.759117	0.692746
low	97	0.8390668630599976	-2.45317	high	97	0.771938	0.793721	high	97	0.751547	0.692746
low	98	0.8385272026062012	-2.45317	high	98	0.77659	0.793721	high	98	0.743978	0.692746
low	99	0.8379915356636047	-2.45317	high	99	0.781245	0.793721	high	99	0.736409	0.692746
low	100	0.8374615907669067	-2.45317	high	100	0.785904	0.793721	high	100	0.728842	0.692746
low	101	0.836938	-2.45317	high	101	0.790566	0.793721	high	101	0.721277	0.692746
low	102	0.836417	-2.45317	high	102	0.795232	0.793721	high	102	0.713712	0.692746
low	103	0.8359012603759766	-2.45317	high	103	0.799899	0.793721	high	103	0.706149	0.692746
low	104	0.8353909254074097	-2.45317	high	104	0.80457	0.793721	high	104	0.698588	0.692746
low	105	0.8348854184150696	-2.45317	high	105	0.809245	0.793721	high	105	0.691028	0.692746
low	106	0.8343822360038757	-2.45317	high	106	0.813922	0.793721	high	106	0.68347	0.692746
low	107	0.8338844180107117	-2.45317	high	107	0.818604	0.793721	high	107	0.675913	0.692746
low	108	0.8333908915519714	-2.45317	high	108	0.82329	0.793721	high	108	0.668359	0.692746
low	109	0.8329030871391296	-2.45317	high	109	0.82798	0.793721	high	109	0.660806	0.692746
low	110	0.8324195146560669	-2.45317	high	110	0.832675	0.793721	high	110	0.653254	0.692746
low	111	0.8319400548934937	-2.45317	high	111	0.837372	0.793721	high	111	0.645704	0.692746
low	112	0.8249022364616394	-2.45317	high	112	0.834402	0.793721	high	112	0.635988	0.692746
low	113	0.8113018870353699	-2.45317	high	113	0.823765	0.793721	high	113	0.624106	0.692746
low	114	0.7977018356323242	-2.45317	high	114	0.813128	0.793721	high	114	0.612223	0.692746
low	115	0.7841018438339233	-2.45317	high	115	0.802491	0.793721	high	115	0.600341	0.692746
low	116	0.7705022096633911	-2.45317	high	116	0.791856	0.793721	high	116	0.58846	0.692746
low	117	0.7569030523300171	-2.45317	high	117	0.781222	0.793721	high	117	0.576554	0.692746
low	118	0.7433040738105774	-2.45317	high	118	0.770589	0.793721	high	118	0.564699	0.692746
low	119	0.7297053337097168	-2.45317	high	119	0.759956	0.793721	high	119	0.55282	0.692746
low	120	0.7161070108413696	-2.45317	high	120	0.749325	0.793721	high	120	0.540942	0.692746
low	121	0.7025097608566284	-2.45317	high	121	0.738694	0.793721	high	121	0.529064	0.692746
low	122	0.6889132261276245	-2.45317	high	122	0.728063	0.793721	high	122	0.517188	0.692746
low	123	0.6753175854682922	-2.45317	high	123	0.717434	0.793721	high	123	0.505311	0.692746
low	124	0.6617225408554077	-2.45317	high	124	0.706807	0.793721	high	124	0.493436	0.692746
low	125	0.648128	-2.45317	high	125	0.696181	0.793721	high	125	0.481562	0.692746
low	126	0.6345345377922058	-2.45317	high	126	0.685556	0.793721	high	126	0.469689	0.692746
low	127	0.6209416389465332	-2.45317	high	127	0.674934	0.793721	high	127	0.457817	0.692746
low	128	0.60735	-2.45317	high	128	0.664313	0.793721	high	128	0.445946	0.692746
low	129	0.5937593579292297	-2.45317	high	129	0.653696	0.793721	high	129	0.434077	0.692746
low	130	0.5801687240600586	-2.45317	high	130	0.643081	0.793721	high	130	0.422211	0.692746
low	131	0.5665783882141113	-2.45317	high	131	0.632468	0.793721	high	131	0.410347	0.692746
low	132	0.5529886484146118	-2.45317	high	132	0.621856	0.793721	high	132	0.398485	0.692746
low	133	0.5394002199172974	-2.45317	high	133	0.611246	0.793721	high	133	0.386626	0.692746
low	134	0.5258132815361023	-2.45317	high	134	0.600638	0.793721	high	134	0.37477	0.692746
low	135	0.5122284889221191	-2.45317	high	135	0.590032	0.793721	high	135	0.362917	0.692746
low	136	0.49864429235458374	-2.45317	high	136	0.579428	0.793721	high	136	0.351068	0.692746
low	137	0.48506155610084534	-2.45317	high	137	0.568826	0.793721	high	137	0.339224	0.692746
low	138	0.47148019075393677	-2.45317	high	138	0.558225	0.793721	high	138	0.327385	0.692746
low	139	0.4578995704650879	-2.45317	high	139	0.547627	0.793721	high	139	0.315553	0.692746
low	140	0.4443194270133972	-2.45317	high	140	0.537033	0.793721	high	140	0.303729	0.692746
low	141	0.4307403564453125	-2.45317	high	141	0.526442	0.793721	high	141	0.291914	0.692746
low	142	0.4171633720397949	-2.45317	high	142	0.515855	0.793721	high	142	0.280112	0.692746
low	143	0.40358877182006836	-2.45317	high	143	0.505274	0.793721	high	143	0.268324	0.692746
low	144	0.3968021273612976	-2.45317	high	144	0.499986	0.793721	high	144	0.262436	0.692746
low	145	0.3968021273612976	-2.45317	high	145	0.499986	0.793721	high	145	0.262436	0.692746
low	146	0.3968021273612976	-2.45317	high	146	0.499986	0.793721	high	146	0.262436	0.692746
low	147	0.3968021273612976	-2.45317	high	147	0.499986	0.793721	high	147	0.262436	0.692746
low	148	0.3968021273612976	-2.45317	high	148	0.499986	0.793721	high	148	0.262436	0.692746
low	149	0.3968021273612976	-2.45317	high	149	0.499986	0.793721	high	149	0.262436	0.692746
low	150	0.3968021273612976	-2.45317	high	150	0.499986	0.793721	high	150	0.262436	0.692746
low	151	0.3968021273612976	-2.45317	high	151	0.499986	0.793721	high	151	0.262436	0.692746
low	152	0.3968021273612976	-2.45317	high	152	0.499986	0.793721	high	152	0.262436	0.692746
low	153	0.3968021273612976	-2.45317	high	153	0.499986	0.793721	high	153	0.262436	0.692746
low	154	0.3968021273612976	-2.45317	high	154	0.499986	0.793721	high	154	0.262436	0.692746
low	155	0.3968021273612976	-2.45317	high	155	0.499986	0.793721	high	155	0.262436	0.692746
low	156	0.3968021273612976	-2.45317	high	156	0.499986	0.793721	high	156	0.262436	0.692746
low	157	0.3968021273612976	-2.45317	high	157	0.499986	0.793721	high	157	0.262436	0.692746
low	158	0.3968021273612976	-2.45317	high	158	0.499986	0.793721	high	158	0.262436	0.692746
low	159	0.3968021273612976	-2.45317	high	159	0.499986	0.793721	high	159	0.262436	0.692746
high	0	0.6437816619873047	-1.22846	high	0	0.35685	0.790986	low	0	0.413177	0.331096
high	1	0.6437816619873047	-1.22846	high	1	0.35685	0.790986	low	1	0.413177	0.331096
high	2	0.6437816619873047	-1.22846	high	2	0.35685	0.790986	low	2	0.413177	0.331096
high	3	0.6437816619873047	-1.22846	high	3	0.35685	0.790986	low	3	0.413177	0.331096
high	4	0.6437816619873047	-1.22846	high	4	0.35685	0.790986	low	4	0.413177	0.331096
high	5	0.6437816619873047	-1.22846	high	5	0.35685	0.790986	low	5	0.413177	0.331096
high	6	0.6437816619873047	-1.22846	high	6	0.35685	0.790986	low	6	0.413177	0.331096
high	7	0.6437816619873047	-1.22846	high	7	0.35685	0.790986	low	7	0.413177	0.331096
high	8	0.6437816619873047	-1.22846	high	8	0.35685	0.790986	low	8	0.413177	0.331096
high	9	0.6437816619873047	-1.22846	high	9	0.35685	0.790986	low	9	0.413177	0.331096
high	10	0.6437816619873047	-1.22846	high	10	0.35685	0.790986	low	10	0.413177	0.331096
high	11	0.6437816619873047	-1.22846	high	11	0.35685	0.790986	low	11	0.413177	0.331096
high	12	0.6437816619873047	-1.22846	high	12	0.35685	0.790986	low	12	0.413177	0.331096
high	13	0.6437816619873047	-1.22846	high	13	0.35685	0.790986	low	13	0.413177	0.331096
high	14	0.6437816619873047	-1.22846	high	14	0.35685	0.790986	low	14	0.413177	0.331096
high	15	0.6437816619873047	-1.22846	high	15	0.35685	0.790986	low	15	0.413177	0.331096
high	16	0.6481003761291504	-1.22846	high	16	0.36577	0.790986	low	16	0.418947	0.331096
high	17	0.6567381024360657	-1.22846	high	17	0.383936	0.790986	low	17	0.430486	0.331096
high	18	0.6653763651847839	-1.22846	high	18	0.402131	0.790986	low	18	0.442026	0.331096
high	19	0.6740151643753052	-1.22846	high	19	0.420593	0.790986	low	19	0.453568	0.331096
high	20	0.6826542615890503	-1.22846	high	20	0.438947	0.790986	low	20	0.46511	0.331096
high	21	0.6912938952445984	-1.22846	high	21	0.457365	0.790986	low	21	0.476653	0.331096
high	22	0.6999337673187256	-1.22846	high	22	0.475776	0.790986	low	22	0.488197	0.331096
high	23	0.7085739970207214	-1.22846	high	23	0.494449	0.790986	low	23	0.499743	0.331096
high	24	0.7172144651412964	-1.22846	high	24	0.512804	0.790986	low	24	0.511289	0.331096
high	25	0.7258550524711609	-1.22846	high	25	0.53153	0.790986	low	25	0.522836	0.331096
high	26	0.734496	-1.22846	high	26	0.550039	0.790986	low	26	0.534384	0.331096
high	27	0.7431374788284302	-1.22846	high	27	0.568529	0.790986	low	27	0.545933	0.331096
high	28	0.7517789006233215	-1.22846	high	28	0.587068	0.790986	low	28	0.557483	0.331096
high	29	0.7604206204414368	-1.22846	high	29	0.605588	0.790986	low	29	0.569033	0.331096
high	30	0.7690623998641968	-1.22846	high	30	0.624058	0.790986	low	30	0.580584	0.331096
high	31	0.7777044177055359	-1.22846	high	31	0.642911	0.790986	low	31	0.592135	0.331096
high	32	0.7863467335700989	-1.22846	high	32	0.661409	0.790986	low	32	0.603687	0.331096
high	33	0.7949893474578857	-1.22846	high	33	0.679924	0.790986	low	33	0.615239	0.331096
high	34	0.8036321401596069	-1.22846	high	34	0.698438	0.790986	low	34	0.626791	0.331096
high	35	0.812275	-1.22846	high	35	0.716972	0.790986	low	35	0.638344	0.331096
high	36	0.8209185600280762	-1.22846	high	36	0.735559	0.790986	low	36	0.649898	0.331096
high	37	0.8295621871948242	-1.22846	high	37	0.754077	0.790986	low	37	0.661452	0.331096
high	38	0.8382059335708618	-1.22846	high	38	0.77306	0.790986	low	38	0.673007	0.331096
high	39	0.84685	-1.22846	high	39	0.791614	0.790986	low	39	0.684562	0.331096
high	40	0.8554937243461609	-1.22846	high	40	0.810219	0.790986	low	40	0.696118	0.331096
high	41	0.8641383051872253	-1.22846	high	41	0.828825	0.790986	low	41	0.707674	0.331096
high	42	0.872783	-1.22846	high	42	0.847347	0.790986	low	42	0.71923	0.331096
high	43	0.8814275860786438	-1.22846	high	43	0.865924	0.790986	low	43	0.730787	0.331096
high	44	0.8900724649429321	-1.22846	high	44	0.88447	0.790986	low	44	0.742344	0.331096
high	45	0.8987174034118652	-1.22846	high	45	0.902861	0.790986	low	45	0.753902	0.331096
high	46	0.9073626399040222	-1.22846	high	46	0.92195	0.790986	low	46	0.765459	0.331096
high	47	0.9160079956054688	-1.22846	high	47	0.940571	0.790986	low	47	0.777017	0.331096
high	48	0.9176812171936035	-1.22846	high	48	0.945449	0.790986	low	48	0.784771	0.331096
high	49	0.9123823046684265	-1.22846	high	49	0.936705	0.790986	low	49	0.788722	0.331096
high	50	0.9070836901664734	-1.22846	high	50	0.927941	0.790986	low	50	0.792673	0.331096
high	51	0.9017854928970337	-1.22846	high	51	0.919178	0.790986	low	51	0.796625	0.331096
high	52	0.8964871168136597	-1.22846	high	52	0.910415	0.790986	low	52	0.800578	0.331096
high	53	0.8911890983581543	-1.22846	high	53	0.901445	0.790986	low	53	0.80453	0.331096
high	54	0.885891	-1.22846	high	54	0.892991	0.790986	low	54	0.808483	0.331096
high	55	0.8805936574935913	-1.22846	high	55	0.88429	0.790986	low	55	0.812437	0.331096
high	56	0.8752962946891785	-1.22846	high	56	0.875661	0.790986	low	56	0.816391	0.331096
high	57	0.8699990510940552	-1.22846	high	57	0.867118	0.790986	low	57	0.820346	0.331096
high	58	0.8647019267082214	-1.22846	high	58	0.858126	0.790986	low	58	0.824301	0.331096
high	59	0.8594050407409668	-1.22846	high	59	0.849685	0.790986	low	59	0.828256	0.331096
high	60	0.854108	-1.22846	high	60	0.841252	0.790986	low	60	0.832212	0.331096
high	61	0.8488122224807739	-1.22846	high	61	0.833271	0.790986	low	61	0.836169	0.331096
high	62	0.8435159921646118	-1.22846	high	62	0.824588	0.790986	low	62	0.840126	0.331096
high	63	0.8382198214530945	-1.22846	high	63	0.816237	0.790986	low	63	0.844084	0.331096
high	64	0.8329240083694458	-1.22846	high	64	0.8083	0.790986	low	64	0.848042	0.331096
high	65	0.827628	-1.22846	high	65	0.80008	0.790986	low	65	0.852001	0.331096
high	66	0.8223333358764648	-1.22846	high	66	0.791904	0.790986	low	66	0.85596	0.331096
high	67	0.8170382380485535	-1.22846	high	67	0.783786	0.790986	low	67	0.85992	0.331096
high	68	0.8117433786392212	-1.22846	high	68	0.775715	0.790986	low	68	0.86388	0.331096
high	69	0.806449	-1.22846	high	69	0.767505	0.790986	low	69	0.86784	0.331096
high	70	0.8011543154716492	-1.22846	high	70	0.759526	0.790986	low	70	0.871801	0.331096
high	71	0.7958601713180542	-1.22846	high	71	0.751495	0.790986	low	71	0.875761	0.331096
high	72	0.7905662655830383	-1.22846	high	72	0.74396	0.790986	low	72	0.879722	0.331096
high	73	0.7852726578712463	-1.22846	high	73	0.736164	0.790986	low	73	0.883683	0.331096
high	74	0.7799794673919678	-1.22846	high	74	0.728412	0.790986	low	74	0.887646	0.331096
high	75	0.7746866941452026	-1.22846	high	75	0.720587	0.790986	low	75	0.891608	0.331096
high	76	0.7693942189216614	-1.22846	high	76	0.713017	0.790986	low	76	0.895571	0.331096
high	77	0.7641019225120544	-1.22846	high	77	0.705554	0.790986	low	77	0.899535	0.331096
high	78	0.7588099241256714	-1.22846	high	78	0.697948	0.790986	low	78	0.903499	0.331096
high	79	0.753518	-1.22846	high	79	0.690459	0.790986	low	79	0.907464	0.331096
high	80	0.7446141242980957	-1.22846	high	80	0.686477	0.790986	low	80	0.90552	0.331096
high	81	0.7320970892906189	-1.22846	high	81	0.685674	0.790986	low	81	0.897666	0.331096
high	82	0.7195800542831421	-1.22846	high	82	0.684642	0.790986	low	82	0.889813	0.331096
high	83	0.7070631384849548	-1.22846	high	83	0.684171	0.790986	low	83	0.88196	0.331096
high	84	0.6945464611053467	-1.22846	high	84	0.683419	0.790986	low	84	0.874107	0.331096
high	85	0.6820298433303833	-1.22846	high	85	0.682799	0.790986	low	85	0.866254	0.331096
high	86	0.6695131659507751	-1.22846	high	86	0.68203	0.790986	low	86	0.858401	0.331096
high	87	0.6569967269897461	-1.22846	high	87	0.681391	0.790986	low	87	0.850548	0.331096
high	88	0.6444803476333618	-1.22846	high	88	0.68099	0.790986	low	88	0.842696	0.331096
high	89	0.6319640874862671	-1.22846	high	89	0.68046	0.790986	low	89	0.834843	0.331096
high	90	0.6194478869438171	-1.22846	high	90	0.680103	0.790986	low	90	0.826991	0.331096
high	91	0.6069319248199463	-1.22846	high	91	0.67986	0.790986	low	91	0.819139	0.331096
high	92	0.594416	-1.22846	high	92	0.679137	0.790986	low	92	0.811287	0.331096
high	93	0.5819005966186523	-1.22846	high	93	0.678845	0.790986	low	93	0.803435	0.331096
high	94	0.5693852305412292	-1.22846	high	94	0.678706	0.790986	low	94	0.795583	0.331096
high	95	0.5568698644638062	-1.22846	high	95	0.678694	0.790986	low	95	0.787732	0.331096
high	96	0.5443547964096069	-1.22846	high	96	0.678127	0.790986	low	96	0.779881	0.331096
high	97	0.5318397879600525	-1.22846	high	97	0.678107	0.790986	low	97	0.772031	0.331096
high	98	0.5193249583244324	-1.22846	high	98	0.677988	0.790986	low	98	0.764181	0.331096
high	99	0.5068105459213257	-1.22846	high	99	0.67813	0.790986	low	99	0.756331	0.331096
high	100	0.49429625272750854	-1.22846	high	100	0.677953	0.790986	low	100	0.748482	0.331096
high	101	0.48178237676620483	-1.22846	high	101	0.678033	0.790986	low	101	0.740634	0.331096
high	102	0.46926870942115784	-1.22846	high	102	0.67759	0.790986	low	102	0.732786	0.331096
high	103	0.4567553400993347	-1.22846	high	103	0.677922	0.790986	low	103	0.724938	0.331096
high	104	0.44424229860305786	-1.22846	high	104	0.678038	0.790986	low	104	0.71709	0.331096
high	105	0.43172964453697205	-1.22846	high	105	0.677898	0.790986	low	105	0.709242	0.331096
high	106	0.41921740770339966	-1.22846	high	106	0.678144	0.790986	low	106	0.701394	0.331096
high	107	0.406705	-1.22846	high	107	0.677909	0.790986	low	107	0.693547	0.331096
high	108	0.3941936194896698	-1.22846	high	108	0.678185	0.790986	low	108	0.6857	0.331096
high	109	0.38168272376060486	-1.22846	high	109	0.678379	0.790986	low	109	0.677853	0.331096
high	110	0.36917227506637573	-1.22846	high	110	0.678481	0.790986	low	110	0.670007	0.331096
high	111	0.3566622734069824	-1.22846	high	111	0.678615	0.790986	low	111	0.662161	0.331096
high	112	0.3460130989551544	-1.22846	high	112	0.68049	0.790986	low	112	0.652449	0.331096
high	113	0.33722418546676636	-1.22846	high	113	0.684266	0.790986	low	113	0.64087	0.331096
high	114	0.3284352719783783	-1.22846	high	114	0.688055	0.790986	low	114	0.629291	0.331096
high	115	0.31964635848999023	-1.22846	high	115	0.691942	0.790986	low	115	0.617712	0.331096
high	116	0.31085747480392456	-1.22846	high	116	0.695797	0.790986	low	116	0.606134	0.331096
high	117	0.3020685911178589	-1.22846	high	117	0.699433	0.790986	low	117	0.594555	0.331096
high	118	0.2932797372341156	-1.22846	high	118	0.703689	0.790986	low	118	0.582976	0.331096
high	119	0.2844909727573395	-1.22846	high	119	0.707474	0.790986	low	119	0.571398	0.331096
high	120	0.27570217847824097	-1.22846	high	120	0.711271	0.790986	low	120	0.559819	0.331096
high	121	0.26691344380378723	-1.22846	high	121	0.715135	0.790986	low	121	0.548241	0.331096
high	122	0.2581247389316559	-1.22846	high	122	0.71897	0.790986	low	122	0.536662	0.331096
high	123	0.2493360936641693	-1.22846	high	123	0.722777	0.790986	low	123	0.525084	0.331096
high	124	0.24054746329784393	-1.22846	high	124	0.726945	0.790986	low	124	0.513506	0.331096
high	125	0.2317589521408081	-1.22846	high	125	0.730543	0.790986	low	125	0.501927	0.331096
high	126	0.22297045588493347	-1.22846	high	126	0.734972	0.790986	low	126	0.490349	0.331096
high	127	0.21418197453022003	-1.22846	high	127	0.738915	0.790986	low	127	0.478771	0.331096
high	128	0.20539350807666779	-1.22846	high	128	0.742867	0.790986	low	128	0.467193	0.331096
high	129	0.1966051310300827	-1.22846	high	129	0.746838	0.790986	low	129	0.455615	0.331096
high	130	0.18781684339046478	-1.22846	high	130	0.750423	0.790986	low	130	0.444037	0.331096
high	131	0.1790286898612976	-1.22846	high	131	0.754854	0.790986	low	131	0.432459	0.331096
high	132	0.1702406257390976	-1.22846	high	132	0.758578	0.790986	low	132	0.420881	0.331096
high	133	0.16145269572734833	-1.22846	high	133	0.762934	0.790986	low	133	0.409304	0.331096
high	134	0.1526648998260498	-1.22846	high	134	0.766632	0.790986	low	134	0.397726	0.331096
high	135	0.14387722313404083	-1.22846	high	135	0.77109	0.790986	low	135	0.386149	0.331096
high	136	0.13508978486061096	-1.22846	high	136	0.775202	0.790986	low	136	0.374571	0.331096
high	137	0.126303	-1.22846	high	137	0.779091	0.790986	low	137	0.362994	0.331096
high	138	0.11751572042703629	-1.22846	high	138	0.78348	0.790986	low	138	0.351417	0.331096
high	139	0.108729	-1.22846	high	139	0.787196	0.790986	low	139	0.33984	0.331096
high	140	0.0999432	-1.22846	high	140	0.791839	0.790986	low	140	0.328263	0.331096
high	141	0.0911575	-1.22846	high	141	0.795897	0.790986	low	141	0.316686	0.331096
high	142	0.0823724	-1.22846	high	142	0.800097	0.790986	low	142	0.305109	0.331096
high	143	0.0735883	-1.22846	high	143	0.804523	0.790986	low	143	0.293533	0.331096
high	144	0.0691967	-1.22846	high	144	0.806538	0.790986	low	144	0.287745	0.331096
high	145	0.0691967	-1.22846	high	145	0.806538	0.790986	low	145	0.287745	0.331096
high	146	0.0691967	-1.22846	high	146	0.806538	0.790986	low	146	0.287745	0.331096
high	147	0.0691967	-1.22846	high	147	0.806538	0.790986	low	147	0.287745	0.331096
high	148	0.0691967	-1.22846	high	148	0.806538	0.790986	low	148	0.287745	0.331096
high	149	0.0691967	-1.22846	high	149	0.806538	0.790986	low	149	0.287745	0.331096
high	150	0.0691967	-1.22846	high	150	0.806538	0.790986	low	150	0.287745	0.331096
high	151	0.0691967	-1.22846	high	151	0.806538	0.790986	low	151	0.287745	0.331096
high	152	0.0691967	-1.22846	high	152	0.806538	0.790986	low	152	0.287745	0.331096
high	153	0.0691967	-1.22846	high	153	0.806538	0.790986	low	153	0.287745	0.331096
high	154	0.0691967	-1.22846	high	154	0.806538	0.790986	low	154	0.287745	0.331096
high	155	0.0691967	-1.22846	high	155	0.806538	0.790986	low	155	0.287745	0.331096
high	156	0.0691967	-1.22846	high	156	0.806538	0.790986	low	156	0.287745	0.331096
high	157	0.0691967	-1.22846	high	157	0.806538	0.790986	low	157	0.287745	0.331096
high	158	0.0691967	-1.22846	high	158	0.806538	0.790986	low	158	0.287745	0.331096
high	159	0.0691967	-1.22846	high	159	0.806538	0.790986	low	159	0.287745	0.331096
low	0	0.5132702589035034	-4.20826	low	0	0.254141	0.388614	low	0	0.573645	0.300322
low	1	0.5132702589035034	-4.20826	low	1	0.254141	0.388614	low	1	0.573645	0.300322
low	2	0.5132702589035034	-4.20826	low	2	0.254141	0.388614	low	2	0.573645	0.300322
low	3	0.5132702589035034	-4.20826	low	3	0.254141	0.388614	low	3	0.573645	0.300322
low	4	0.5132702589035034	-4.20826	low	4	0.254141	0.388614	low	4	0.573645	0.300322
low	5	0.5132702589035034	-4.20826	low	5	0.254141	0.388614	low	5	0.573645	0.300322
low	6	0.5132702589035034	-4.20826	low	6	0.254141	0.388614	low	6	0.573645	0.300322
low	7	0.5132702589035034	-4.20826	low	7	0.254141	0.388614	low	7	0.573645	0.300322
low	8	0.5132702589035034	-4.20826	low	8	0.254141	0.388614	low	8	0.573645	0.300322
low	9	0.5132702589035034	-4.20826	low	9	0.254141	0.388614	low	9	0.573645	0.300322
low	10	0.5132702589035034	-4.20826	low	10	0.254141	0.388614	low	10	0.573645	0.300322
low	11	0.5132702589035034	-4.20826	low	11	0.254141	0.388614	low	11	0.573645	0.300322
low	12	0.5132702589035034	-4.20826	low	12	0.254141	0.388614	low	12	0.573645	0.300322
low	13	0.5132702589035034	-4.20826	low	13	0.254141	0.388614	low	13	0.573645	0.300322
low	14	0.5132702589035034	-4.20826	low	14	0.254141	0.388614	low	14	0.573645	0.300322
low	15	0.5132702589035034	-4.20826	low	15	0.254141	0.388614	low	15	0.573645	0.300322
low	16	0.5190510749816895	-4.20826	low	16	0.261078	0.388614	low	16	0.578631	0.300322
low	17	0.5306142568588257	-4.20826	low	17	0.274956	0.388614	low	17	0.588603	0.300322
low	18	0.5421785116195679	-4.20826	low	18	0.288835	0.388614	low	18	0.598577	0.300322
low	19	0.553743	-4.20826	low	19	0.302717	0.388614	low	19	0.608551	0.300322
low	20	0.5653090476989746	-4.20826	low	20	0.316601	0.388614	low	20	0.618526	0.300322
low	21	0.5768770575523376	-4.20826	low	21	0.330487	0.388614	low	21	0.628502	0.300322
low	22	0.5884477496147156	-4.20826	low	22	0.344374	0.388614	low	22	0.638478	0.300322
low	23	0.6000208854675293	-4.20826	low	23	0.358263	0.388614	low	23	0.648454	0.300322
low	24	0.6115955114364624	-4.20826	low	24	0.372153	0.388614	low	24	0.658431	0.300322
low	25	0.6231711506843567	-4.20826	low	25	0.386044	0.388614	low	25	0.668408	0.300322
low	26	0.6347475647926331	-4.20826	low	26	0.399936	0.388614	low	26	0.678385	0.300322
low	27	0.646325	-4.20826	low	27	0.413829	0.388614	low	27	0.688363	0.300322
low	28	0.6579023599624634	-4.20826	low	28	0.427723	0.388614	low	28	0.698341	0.300322
low	29	0.6694806814193726	-4.20826	low	29	0.441618	0.388614	low	29	0.708319	0.300322
low	30	0.6810601353645325	-4.20826	low	30	0.455514	0.388614	low	30	0.718297	0.300322
low	31	0.6926407217979431	-4.20826	low	31	0.46941	0.388614	low	31	0.728275	0.300322
low	32	0.7042226195335388	-4.20826	low	32	0.483307	0.388614	low	32	0.738254	0.300322
low	33	0.715805	-4.20826	low	33	0.497204	0.388614	low	33	0.748234	0.300322
low	34	0.7273885011672974	-4.20826	low	34	0.511102	0.388614	low	34	0.758214	0.300322
low	35	0.7389723658561707	-4.20826	low	35	0.525001	0.388614	low	35	0.768195	0.300322
low	36	0.7505568265914917	-4.20826	low	36	0.538899	0.388614	low	36	0.778176	0.300322
low	37	0.7621415257453918	-4.20826	low	37	0.552798	0.388614	low	37	0.788157	0.300322
low	38	0.7737272381782532	-4.20826	low	38	0.566698	0.388614	low	38	0.798138	0.300322
low	39	0.7853137850761414	-4.20826	low	39	0.580598	0.388614	low	39	0.80812	0.300322
low	40	0.7969005703926086	-4.20826	low	40	0.594499	0.388614	low	40	0.818102	0.300322
low	41	0.8084878921508789	-4.20826	low	41	0.608399	0.388614	low	41	0.828084	0.300322
low	42	0.8200758099555969	-4.20826	low	42	0.622301	0.388614	low	42	0.838066	0.300322
low	43	0.8316644430160522	-4.20826	low	43	0.636202	0.388614	low	43	0.848049	0.300322
low	44	0.8432539105415344	-4.20826	low	44	0.650104	0.388614	low	44	0.858032	0.300322
low	45	0.8548434972763062	-4.20826	low	45	0.664006	0.388614	low	45	0.868015	0.300322
low	46	0.8664339184761047	-4.20826	low	46	0.677908	0.388614	low	46	0.877999	0.300322
low	47	0.8780244588851929	-4.20826	low	47	0.691811	0.388614	low	47	0.887982	0.300322
low	48	0.8807851672172546	-4.20826	low	48	0.702598	0.388614	low	48	0.89276	0.300322
low	49	0.8747204542160034	-4.20826	low	49	0.710271	0.388614	low	49	0.892333	0.300322
low	50	0.8686612248420715	-4.20826	low	50	0.717945	0.388614	low	50	0.891907	0.300322
low	51	0.8626086115837097	-4.20826	low	51	0.725622	0.388614	low	51	0.89148	0.300322
low	52	0.8565601110458374	-4.20826	low	52	0.7333	0.388614	low	52	0.891054	0.300322
low	53	0.8505170941352844	-4.20826	low	53	0.74098	0.388614	low	53	0.890629	0.300322
low	54	0.8444778323173523	-4.20826	low	54	0.748663	0.388614	low	54	0.890203	0.300322
low	55	0.8384422063827515	-4.20826	low	55	0.756347	0.388614	low	55	0.889777	0.300322
low	56	0.8324114084243774	-4.20826	low	56	0.764032	0.388614	low	56	0.889352	0.300322
low	57	0.8263858556747437	-4.20826	low	57	0.771719	0.388614	low	57	0.888927	0.300322
low	58	0.8203660845756531	-4.20826	low	58	0.779407	0.388614	low	58	0.888502	0.300322
low	59	0.814318	-4.20826	low	59	0.787098	0.388614	low	59	0.888078	0.300322
low	60	0.8083469271659851	-4.20826	low	60	0.79479	0.388614	low	60	0.887655	0.300322
low	61	0.8023445010185242	-4.20826	low	61	0.802483	0.388614	low	61	0.887232	0.300322
low	62	0.7963465452194214	-4.20826	low	62	0.810178	0.388614	low	62	0.886809	0.300322
low	63	0.7903534173965454	-4.20826	low	63	0.817873	0.388614	low	63	0.886387	0.300322
low	64	0.7843647599220276	-4.20826	low	64	0.825571	0.388614	low	64	0.885965	0.300322
low	65	0.7783811092376709	-4.20826	low	65	0.83327	0.388614	low	65	0.885543	0.300322
low	66	0.7724029421806335	-4.20826	low	66	0.840972	0.388614	low	66	0.885121	0.300322
low	67	0.7664300203323364	-4.20826	low	67	0.848675	0.388614	low	67	0.8847	0.300322
low	68	0.7604660987854004	-4.20826	low	68	0.856379	0.388614	low	68	0.884279	0.300322
low	69	0.7545113563537598	-4.20826	low	69	0.864084	0.388614	low	69	0.883858	0.300322
low	70	0.7485610246658325	-4.20826	low	70	0.871791	0.388614	low	70	0.883438	0.300322
low	71	0.7426153421401978	-4.20826	low	71	0.879499	0.388614	low	71	0.882975	0.300322
low	72	0.7366745471954346	-4.20826	low	72	0.887208	0.388614	low	72	0.882598	0.300322
low	73	0.7307373881340027	-4.20826	low	73	0.894918	0.388614	low	73	0.882179	0.300322
low	74	0.7248052358627319	-4.20826	low	74	0.90263	0.388614	low	74	0.88176	0.300322
low	75	0.7188774943351746	-4.20826	low	75	0.910343	0.388614	low	75	0.881341	0.300322
low	76	0.7129549384117126	-4.20826	low	76	0.918056	0.388614	low	76	0.880922	0.300322
low	77	0.7070426344871521	-4.20826	low	77	0.925771	0.388614	low	77	0.880504	0.300322
low	78	0.701099	-4.20826	low	78	0.933487	0.388614	low	78	0.880086	0.300322
low	79	0.6952387094497681	-4.20826	low	79	0.941204	0.388614	low	79	0.879668	0.300322
low	80	0.6944688558578491	-4.20826	low	80	0.941954	0.388614	low	80	0.874575	0.300322
low	81	0.6988240480422974	-4.20826	low	81	0.93574	0.388614	low	81	0.864808	0.300322
low	82	0.703182	-4.20826	low	82	0.929525	0.388614	low	82	0.855041	0.300322
low	83	0.7075437307357788	-4.20826	low	83	0.923311	0.388614	low	83	0.845274	0.300322
low	84	0.7119086980819702	-4.20826	low	84	0.917098	0.388614	low	84	0.835506	0.300322
low	85	0.7162777185440063	-4.20826	low	85	0.910887	0.388614	low	85	0.825739	0.300322
low	86	0.7206507325172424	-4.20826	low	86	0.904677	0.388614	low	86	0.815973	0.300322
low	87	0.7250250577926636	-4.20826	low	87	0.898467	0.388614	low	87	0.806206	0.300322
low	88	0.7294017672538757	-4.20826	low	88	0.892258	0.388614	low	88	0.79644	0.300322
low	89	0.73378	-4.20826	low	89	0.886051	0.388614	low	89	0.786674	0.300322
low	90	0.7381603121757507	-4.20826	low	90	0.879845	0.388614	low	90	0.776908	0.300322
low	91	0.7425421476364136	-4.20826	low	91	0.87364	0.388614	low	91	0.767143	0.300322
low	92	0.7469262480735779	-4.20826	low	92	0.867436	0.388614	low	92	0.757377	0.300322
low	93	0.7513118982315063	-4.20826	low	93	0.861233	0.388614	low	93	0.747612	0.300322
low	94	0.7557007074356079	-4.20826	low	94	0.855033	0.388614	low	94	0.737847	0.300322
low	95	0.7600910067558289	-4.20826	low	95	0.848834	0.388614	low	95	0.728082	0.300322
low	96	0.764484	-4.20826	low	96	0.842637	0.388614	low	96	0.718318	0.300322
low	97	0.7688416242599487	-4.20826	low	97	0.83644	0.388614	low	97	0.708553	0.300322
low	98	0.7732778787612915	-4.20826	low	98	0.830246	0.388614	low	98	0.69879	0.300322
low	99	0.7776793241500854	-4.20826	low	99	0.823861	0.388614	low	99	0.689026	0.300322
low	100	0.7820847630500793	-4.20826	low	100	0.817868	0.388614	low	100	0.679263	0.300322
low	101	0.7864922881126404	-4.20826	low	101	0.811684	0.388614	low	101	0.669499	0.300322
low	102	0.7909011840820312	-4.20826	low	102	0.805502	0.388614	low	102	0.659736	0.300322
low	103	0.7953125834465027	-4.20826	low	103	0.799143	0.388614	low	103	0.649973	0.300322
low	104	0.7997258901596069	-4.20826	low	104	0.793098	0.388614	low	104	0.640211	0.300322
low	105	0.8041412234306335	-4.20826	low	105	0.786976	0.388614	low	105	0.630448	0.300322
low	106	0.8085586428642273	-4.20826	low	106	0.780805	0.388614	low	106	0.620687	0.300322
low	107	0.8129787445068359	-4.20826	low	107	0.774448	0.388614	low	107	0.610925	0.300322
low	108	0.8174004554748535	-4.20826	low	108	0.768474	0.388614	low	108	0.601164	0.300322
low	109	0.8218237161636353	-4.20826	low	109	0.762315	0.388614	low	109	0.591403	0.300322
low	110	0.8262494206428528	-4.20826	low	110	0.755847	0.388614	low	110	0.581642	0.300322
low	111	0.8306775093078613	-4.20826	low	111	0.750005	0.388614	low	111	0.571881	0.300322
low	112	0.8266657590866089	-4.20826	low	112	0.740334	0.388614	low	112	0.56164	0.300322
low	113	0.814213	-4.20826	low	113	0.727139	0.388614	low	113	0.550918	0.300322
low	114	0.8017604947090149	-4.20826	low	114	0.713945	0.388614	low	114	0.540196	0.300322
low	115	0.7893078923225403	-4.20826	low	115	0.70075	0.388614	low	115	0.529474	0.300322
low	116	0.776855	-4.20826	low	116	0.687325	0.388614	low	116	0.518752	0.300322
low	117	0.7644031643867493	-4.20826	low	117	0.674213	0.388614	low	117	0.508031	0.300322
low	118	0.7519509792327881	-4.20826	low	118	0.661136	0.388614	low	118	0.497309	0.300322
low	119	0.7394989728927612	-4.20826	low	119	0.647771	0.388614	low	119	0.486587	0.300322
low	120	0.7270472645759583	-4.20826	low	120	0.634709	0.388614	low	120	0.475865	0.300322
low	121	0.7145955562591553	-4.20826	low	121	0.621608	0.388614	low	121	0.465144	0.300322
low	122	0.7021440267562866	-4.20826	low	122	0.608423	0.388614	low	122	0.454422	0.300322
low	123	0.689692	-4.20826	low	123	0.595238	0.388614	low	123	0.443701	0.300322
low	124	0.6772410869598389	-4.20826	low	124	0.582054	0.388614	low	124	0.432979	0.300322
low	125	0.6647898554801941	-4.20826	low	125	0.568708	0.388614	low	125	0.422258	0.300322
low	126	0.6523388624191284	-4.20826	low	126	0.555617	0.388614	low	126	0.411536	0.300322
low	127	0.6398878693580627	-4.20826	low	127	0.542495	0.388614	low	127	0.400815	0.300322
low	128	0.6274369955062866	-4.20826	low	128	0.52933	0.388614	low	128	0.390094	0.300322
low	129	0.6149861216545105	-4.20826	low	129	0.516152	0.388614	low	129	0.379373	0.300322
low	130	0.6025354862213135	-4.20826	low	130	0.502801	0.388614	low	130	0.368652	0.300322
low	131	0.5900849103927612	-4.20826	low	131	0.489764	0.388614	low	131	0.357931	0.300322
low	132	0.5776344537734985	-4.20826	low	132	0.476628	0.388614	low	132	0.34721	0.300322
low	133	0.5651840567588806	-4.20826	low	133	0.463458	0.388614	low	133	0.336489	0.300322
low	134	0.5527337789535522	-4.20826	low	134	0.450129	0.388614	low	134	0.325768	0.300322
low	135	0.540284	-4.20826	low	135	0.437093	0.388614	low	135	0.315048	0.300322
low	136	0.5278338193893433	-4.20826	low	136	0.42396	0.388614	low	136	0.304327	0.300322
low	137	0.5153839588165283	-4.20826	low	137	0.410799	0.388614	low	137	0.293606	0.300322
low	138	0.502934	-4.20826	low	138	0.397606	0.388614	low	138	0.282886	0.300322
low	139	0.4904851019382477	-4.20826	low	139	0.384488	0.388614	low	139	0.272166	0.300322
low	140	0.4780358672142029	-4.20826	low	140	0.371216	0.388614	low	140	0.261447	0.300322
low	141	0.4655868411064148	-4.20826	low	141	0.35819	0.388614	low	141	0.250727	0.300322
low	142	0.45313796401023865	-4.20826	low	142	0.345048	0.388614	low	142	0.240008	0.300322
low	143	0.4406893849372864	-4.20826	low	143	0.331882	0.388614	low	143	0.22929	0.300322
low	144	0.43446511030197144	-4.20826	low	144	0.325343	0.388614	low	144	0.22393	0.300322
low	145	0.43446511030197144	-4.20826	low	145	0.325343	0.388614	low	145	0.22393	0.300322
low	146	0.43446511030197144	-4.20826	low	146	0.325343	0.388614	low	146	0.22393	0.300322
low	147	0.43446511030197144	-4.20826	low	147	0.325343	0.388614	low	147	0.22393	0.300322
low	148	0.43446511030197144	-4.20826	low	148	0.325343	0.388614	low	148	0.22393	0.300322
low	149	0.43446511030197144	-4.20826	low	149	0.325343	0.388614	low	149	0.22393	0.300322
low	150	0.43446511030197144	-4.20826	low	150	0.325343	0.388614	low	150	0.22393	0.300322
low	151	0.43446511030197144	-4.20826	low	151	0.325343	0.388614	low	151	0.22393	0.300322
low	152	0.43446511030197144	-4.20826	low	152	0.325343	0.388614	low	152	0.22393	0.300322
low	153	0.43446511030197144	-4.20826	low	153	0.325343	0.388614	low	153	0.22393	0.300322
low	154	0.43446511030197144	-4.20826	low	154	0.325343	0.388614	low	154	0.22393	0.300322
low	155	0.43446511030197144	-4.20826	low	155	0.325343	0.388614	low	155	0.22393	0.300322
low	156	0.43446511030197144	-4.20826	low	156	0.325343	0.388614	low	156	0.22393	0.300322
low	157	0.43446511030197144	-4.20826	low	157	0.325343	0.388614	low	157	0.22393	0.300322
low	158	0.43446511030197144	-4.20826	low	158	0.325343	0.388614	low	158	0.22393	0.300322
low	159	0.43446511030197144	-4.20826	low	159	0.325343	0.388614	low	159	0.22393	0.300322
low	0	0.5408977270126343	-3.53843	low	0	0.13391	0.403558	high	0	0.175775	0.724234
low	1	0.5408977270126343	-3.53843	low	1	0.13391	0.403558	high	1	0.175775	0.724234
low	2	0.5408977270126343	-3.53843	low	2	0.13391	0.403558	high	2	0.175775	0.724234
low	3	0.5408977270126343	-3.53843	low	3	0.13391	0.403558	high	3	0.175775	0.724234
low	4	0.5408977270126343	-3.53843	low	4	0.13391	0.403558	high	4	0.175775	0.724234
low	5	0.5408977270126343	-3.53843	low	5	0.13391	0.403558	high	5	0.175775	0.724234
low	6	0.5408977270126343	-3.53843	low	6	0.13391	0.403558	high	6	0.175775	0.724234
low	7	0.5408977270126343	-3.53843	low	7	0.13391	0.403558	high	7	0.175775	0.724234
low	8	0.5408977270126343	-3.53843	low	8	0.13391	0.403558	high	8	0.175775	0.724234
low	9	0.5408977270126343	-3.53843	low	9	0.13391	0.403558	high	9	0.175775	0.724234
low	10	0.5408977270126343	-3.53843	low	10	0.13391	0.403558	high	10	0.175775	0.724234
low	11	0.5408977270126343	-3.53843	low	11	0.13391	0.403558	high	11	0.175775	0.724234
low	12	0.5408977270126343	-3.53843	low	12	0.13391	0.403558	high	12	0.175775	0.724234
low	13	0.5408977270126343	-3.53843	low	13	0.13391	0.403558	high	13	0.175775	0.724234
low	14	0.5408977270126343	-3.53843	low	14	0.13391	0.403558	high	14	0.175775	0.724234
low	15	0.5408977270126343	-3.53843	low	15	0.13391	0.403558	high	15	0.175775	0.724234
low	16	0.5463806390762329	-3.53843	low	16	0.139979	0.403558	high	16	0.186426	0.724234
low	17	0.5574186444282532	-3.53843	low	17	0.152119	0.403558	high	17	0.207779	0.724234
low	18	0.5684548616409302	-3.53843	low	18	0.164263	0.403558	high	18	0.229194	0.724234
low	19	0.5794809460639954	-3.53843	low	19	0.176409	0.403558	high	19	0.250674	0.724234
low	20	0.5905653238296509	-3.53843	low	20	0.188557	0.403558	high	20	0.27222	0.724234
low	21	0.601638	-3.53843	low	21	0.200708	0.403558	high	21	0.293833	0.724234
low	22	0.6127204298973083	-3.53843	low	22	0.212859	0.403558	high	22	0.315518	0.724234
low	23	0.6238168478012085	-3.53843	low	23	0.225011	0.403558	high	23	0.337282	0.724234
low	24	0.634924	-3.53843	low	24	0.237165	0.403558	high	24	0.359117	0.724234
low	25	0.6460422873497009	-3.53843	low	25	0.249319	0.403558	high	25	0.381015	0.724234
low	26	0.6571685671806335	-3.53843	low	26	0.261475	0.403558	high	26	0.402966	0.724234
low	27	0.6683017611503601	-3.53843	low	27	0.273631	0.403558	high	27	0.424957	0.724234
low	28	0.6794422268867493	-3.53843	low	28	0.285787	0.403558	high	28	0.446997	0.724234
low	29	0.6905894875526428	-3.53843	low	29	0.297944	0.403558	high	29	0.469064	0.724234
low	30	0.7017406225204468	-3.53843	low	30	0.310102	0.403558	high	30	0.491157	0.724234
low	31	0.712896	-3.53843	low	31	0.32226	0.403558	high	31	0.513273	0.724234
low	32	0.7240559458732605	-3.53843	low	32	0.334418	0.403558	high	32	0.535409	0.724234
low	33	0.7352184057235718	-3.53843	low	33	0.346577	0.403558	high	33	0.557555	0.724234
low	34	0.7463825345039368	-3.53843	low	34	0.358736	0.403558	high	34	0.579731	0.724234
low	35	0.7575479745864868	-3.53843	low	35	0.370895	0.403558	high	35	0.601914	0.724234
low	36	0.7687144875526428	-3.53843	low	36	0.383054	0.403558	high	36	0.624107	0.724234
low	37	0.7798820734024048	-3.53843	low	37	0.395213	0.403558	high	37	0.646312	0.724234
low	38	0.7910507917404175	-3.53843	low	38	0.407373	0.403558	high	38	0.668526	0.724234
low	39	0.8022205233573914	-3.53843	low	39	0.419533	0.403558	high	39	0.690748	0.724234
low	40	0.8133910894393921	-3.53843	low	40	0.431693	0.403558	high	40	0.712977	0.724234
low	41	0.8245627284049988	-3.53843	low	41	0.443853	0.403558	high	41	0.735213	0.724234
low	42	0.8357359170913696	-3.53843	low	42	0.456013	0.403558	high	42	0.757455	0.724234
low	43	0.8469106554985046	-3.53843	low	43	0.468174	0.403558	high	43	0.779702	0.724234
low	44	0.8580869436264038	-3.53843	low	44	0.480334	0.403558	high	44	0.801953	0.724234
low	45	0.8692639470100403	-3.53843	low	45	0.492494	0.403558	high	45	0.824209	0.724234
low	46	0.8804414868354797	-3.53843	low	46	0.504655	0.403558	high	46	0.84647	0.724234
low	47	0.8916200399398804	-3.53843	low	47	0.516816	0.403558	high	47	0.868734	0.724234
low	48	0.8942546844482422	-3.53843	low	48	0.528539	0.403558	high	48	0.88076	0.724234
low	49	0.8883466720581055	-3.53843	low	49	0.539826	0.403558	high	49	0.882552	0.724234
low	50	0.8824436068534851	-3.53843	low	50	0.551113	0.403558	high	50	0.88435	0.724234
low	51	0.8765460252761841	-3.53843	low	51	0.562401	0.403558	high	51	0.886154	0.724234
low	52	0.8706523180007935	-3.53843	low	52	0.57369	0.403558	high	52	0.887964	0.724234
low	53	0.864764	-3.53843	low	53	0.58498	0.403558	high	53	0.889779	0.724234
low	54	0.8588770031929016	-3.53843	low	54	0.596269	0.403558	high	54	0.891599	0.724234
low	55	0.8529939651489258	-3.53843	low	55	0.607559	0.403558	high	55	0.893424	0.724234
low	56	0.8471181988716125	-3.53843	low	56	0.61885	0.403558	high	56	0.895254	0.724234
low	57	0.8412492871284485	-3.53843	low	57	0.630141	0.403558	high	57	0.897089	0.724234
low	58	0.8353875875473022	-3.53843	low	58	0.641432	0.403558	high	58	0.898928	0.724234
low	59	0.829532	-3.53843	low	59	0.652724	0.403558	high	59	0.900772	0.724234
low	60	0.823682	-3.53843	low	60	0.664016	0.403558	high	60	0.90262	0.724234
low	61	0.8178361654281616	-3.53843	low	61	0.675309	0.403558	high	61	0.904471	0.724234
low	62	0.8119951486587524	-3.53843	low	62	0.686602	0.403558	high	62	0.906326	0.724234
low	63	0.8061586618423462	-3.53843	low	63	0.697895	0.403558	high	63	0.908184	0.724234
low	64	0.8003265261650085	-3.53843	low	64	0.709188	0.403558	high	64	0.910046	0.724234
low	65	0.7944968938827515	-3.53843	low	65	0.720481	0.403558	high	65	0.911909	0.724234
low	66	0.7886724472045898	-3.53843	low	66	0.731775	0.403558	high	66	0.913776	0.724234
low	67	0.7828564643859863	-3.53843	low	67	0.743069	0.403558	high	67	0.915646	0.724234
low	68	0.7770484685897827	-3.53843	low	68	0.754363	0.403558	high	68	0.917519	0.724234
low	69	0.7712477445602417	-3.53843	low	69	0.765658	0.403558	high	69	0.919396	0.724234
low	70	0.7654525637626648	-3.53843	low	70	0.776953	0.403558	high	70	0.921274	0.724234
low	71	0.7596619725227356	-3.53843	low	71	0.788248	0.403558	high	71	0.923156	0.724234
low	72	0.7538757920265198	-3.53843	low	72	0.799542	0.403558	high	72	0.925039	0.724234
low	73	0.7480936646461487	-3.53843	low	73	0.810838	0.403558	high	73	0.926927	0.724234
low	74	0.7423166036605835	-3.53843	low	74	0.822133	0.403558	high	74	0.928815	0.724234
low	75	0.7365425825119019	-3.53843	low	75	0.833429	0.403558	high	75	0.930705	0.724234
low	76	0.7307774424552917	-3.53843	low	76	0.844724	0.403558	high	76	0.932597	0.724234
low	77	0.7250197529792786	-3.53843	low	77	0.85602	0.403558	high	77	0.934491	0.724234
low	78	0.7192689776420593	-3.53843	low	78	0.867316	0.403558	high	78	0.936387	0.724234
low	79	0.7135246396064758	-3.53843	low	79	0.878612	0.403558	high	79	0.938284	0.724234
low	80	0.7124617099761963	-3.53843	low	80	0.884447	0.403558	high	80	0.938719	0.724234
low	81	0.716078	-3.53843	low	81	0.884821	0.403558	high	81	0.937696	0.724234
low	82	0.7196954488754272	-3.53843	low	82	0.885197	0.403558	high	82	0.936681	0.724234
low	83	0.7233141660690308	-3.53843	low	83	0.885572	0.403558	high	83	0.935678	0.724234
low	84	0.7269353270530701	-3.53843	low	84	0.885948	0.403558	high	84	0.934685	0.724234
low	85	0.7305589914321899	-3.53843	low	85	0.886324	0.403558	high	85	0.933704	0.724234
low	86	0.7341850399971008	-3.53843	low	86	0.886701	0.403558	high	86	0.932732	0.724234
low	87	0.7378139495849609	-3.53843	low	87	0.887078	0.403558	high	87	0.931768	0.724234
low	88	0.7414464950561523	-3.53843	low	88	0.887456	0.403558	high	88	0.930815	0.724234
low	89	0.7450802326202393	-3.53843	low	89	0.887834	0.403558	high	89	0.929869	0.724234
low	90	0.7487149238586426	-3.53843	low	90	0.888213	0.403558	high	90	0.928934	0.724234
low	91	0.7523513436317444	-3.53843	low	91	0.888592	0.403558	high	91	0.928011	0.724234
low	92	0.7559893131256104	-3.53843	low	92	0.888971	0.403558	high	92	0.927096	0.724234
low	93	0.7596288919448853	-3.53843	low	93	0.88935	0.403558	high	93	0.926191	0.724234
low	94	0.7632695436477661	-3.53843	low	94	0.88973	0.403558	high	94	0.925293	0.724234
low	95	0.766911	-3.53843	low	95	0.890111	0.403558	high	95	0.924403	0.724234
low	96	0.770553	-3.53843	low	96	0.890492	0.403558	high	96	0.923525	0.724234
low	97	0.7741974592208862	-3.53843	low	97	0.890873	0.403558	high	97	0.922656	0.724234
low	98	0.7778437733650208	-3.53843	low	98	0.891255	0.403558	high	98	0.921796	0.724234
low	99	0.7814925909042358	-3.53843	low	99	0.891637	0.403558	high	99	0.920943	0.724234
low	100	0.7851428389549255	-3.53843	low	100	0.89202	0.403558	high	100	0.9201	0.724234
low	101	0.7887952327728271	-3.53843	low	101	0.892402	0.403558	high	101	0.919267	0.724234
low	102	0.7924484610557556	-3.53843	low	102	0.892785	0.403558	high	102	0.918443	0.724234
low	103	0.7961036562919617	-3.53843	low	103	0.893169	0.403558	high	103	0.917627	0.724234
low	104	0.799761	-3.53843	low	104	0.893552	0.403558	high	104	0.91682	0.724234
low	105	0.8034208416938782	-3.53843	low	105	0.893937	0.403558	high	105	0.916023	0.724234
low	106	0.8070827722549438	-3.53843	low	106	0.894321	0.403558	high	106	0.915235	0.724234
low	107	0.810748	-3.53843	low	107	0.894706	0.403558	high	107	0.914456	0.724234
low	108	0.814414	-3.53843	low	108	0.895091	0.403558	high	108	0.913684	0.724234
low	109	0.8180809020996094	-3.53843	low	109	0.895476	0.403558	high	109	0.912922	0.724234
low	110	0.8217493891716003	-3.53843	low	110	0.895862	0.403558	high	110	0.912168	0.724234
low	111	0.8254197835922241	-3.53843	low	111	0.896249	0.403558	high	111	0.911424	0.724234
low	112	0.8224071264266968	-3.53843	low	112	0.890198	0.403558	high	112	0.908011	0.724234
low	113	0.81271	-3.53843	low	113	0.877708	0.403558	high	113	0.901952	0.724234
low	114	0.8030134439468384	-3.53843	low	114	0.865218	0.403558	high	114	0.895932	0.724234
low	115	0.7933170795440674	-3.53843	low	115	0.852729	0.403558	high	115	0.889964	0.724234
low	116	0.7836207151412964	-3.53843	low	116	0.840239	0.403558	high	116	0.884043	0.724234
low	117	0.7739244699478149	-3.53843	low	117	0.82775	0.403558	high	117	0.878174	0.724234
low	118	0.7642287015914917	-3.53843	low	118	0.815261	0.403558	high	118	0.872362	0.724234
low	119	0.7545328736305237	-3.53843	low	119	0.802772	0.403558	high	119	0.866615	0.724234
low	120	0.7448371648788452	-3.53843	low	120	0.790284	0.403558	high	120	0.860934	0.724234
low	121	0.7351419925689697	-3.53843	low	121	0.777796	0.403558	high	121	0.855326	0.724234
low	122	0.7254468202590942	-3.53843	low	122	0.765308	0.403558	high	122	0.849784	0.724234
low	123	0.7157519459724426	-3.53843	low	123	0.752821	0.403558	high	123	0.844312	0.724234
low	124	0.7060573697090149	-3.53843	low	124	0.740334	0.403558	high	124	0.838908	0.724234
low	125	0.6963630318641663	-3.53843	low	125	0.727847	0.403558	high	125	0.833568	0.724234
low	126	0.6866689324378967	-3.53843	low	126	0.715361	0.403558	high	126	0.828298	0.724234
low	127	0.6769751310348511	-3.53843	low	127	0.702874	0.403558	high	127	0.823098	0.724234
low	128	0.6672816276550293	-3.53843	low	128	0.690389	0.403558	high	128	0.817978	0.724234
low	129	0.6575890779495239	-3.53843	low	129	0.677903	0.403558	high	129	0.812937	0.724234
low	130	0.6478970050811768	-3.53843	low	130	0.665418	0.403558	high	130	0.80798	0.724234
low	131	0.6382054090499878	-3.53843	low	131	0.652933	0.403558	high	131	0.803112	0.724234
low	132	0.6285141110420227	-3.53843	low	132	0.640449	0.403558	high	132	0.798329	0.724234
low	133	0.6188234090805054	-3.53843	low	133	0.627965	0.403558	high	133	0.793626	0.724234
low	134	0.6091335415840149	-3.53843	low	134	0.615481	0.403558	high	134	0.789004	0.724234
low	135	0.5994440913200378	-3.53843	low	135	0.602998	0.403558	high	135	0.784444	0.724234
low	136	0.5897551774978638	-3.53843	low	136	0.590516	0.403558	high	136	0.779946	0.724234
low	137	0.5800665616989136	-3.53843	low	137	0.578034	0.403558	high	137	0.775514	0.724234
low	138	0.5703783631324768	-3.53843	low	138	0.565554	0.403558	high	138	0.771139	0.724234
low	139	0.5606910586357117	-3.53843	low	139	0.553074	0.403558	high	139	0.766835	0.724234
low	140	0.5510047674179077	-3.53843	low	140	0.540595	0.403558	high	140	0.762598	0.724234
low	141	0.5413195490837097	-3.53843	low	141	0.528116	0.403558	high	141	0.758404	0.724234
low	142	0.5316348671913147	-3.53843	low	142	0.515638	0.403558	high	142	0.754253	0.724234
low	143	0.52195	-3.53843	low	143	0.503161	0.403558	high	143	0.750142	0.724234
low	144	0.5171082019805908	-3.53843	low	144	0.496923	0.403558	high	144	0.748101	0.724234
low	145	0.5171082019805908	-3.53843	low	145	0.496923	0.403558	high	145	0.748101	0.724234
low	146	0.5171082019805908	-3.53843	low	146	0.496923	0.403558	high	146	0.748101	0.724234
low	147	0.5171082019805908	-3.53843	low	147	0.496923	0.403558	high	147	0.748101	0.724234
low	148	0.5171082019805908	-3.53843	low	148	0.496923	0.403558	high	148	0.748101	0.724234
low	149	0.5171082019805908	-3.53843	low	149	0.496923	0.403558	high	149	0.748101	0.724234
low	150	0.5171082019805908	-3.53843	low	150	0.496923	0.403558	high	150	0.748101	0.724234
low	151	0.5171082019805908	-3.53843	low	151	0.496923	0.403558	high	151	0.748101	0.724234
low	152	0.5171082019805908	-3.53843	low	152	0.496923	0.403558	high	152	0.748101	0.724234
low	153	0.5171082019805908	-3.53843	low	153	0.496923	0.403558	high	153	0.748101	0.724234
low	154	0.5171082019805908	-3.53843	low	154	0.496923	0.403558	high	154	0.748101	0.724234
low	155	0.5171082019805908	-3.53843	low	155	0.496923	0.403558	high	155	0.748101	0.724234
low	156	0.5171082019805908	-3.53843	low	156	0.496923	0.403558	high	156	0.748101	0.724234
low	157	0.5171082019805908	-3.53843	low	157	0.496923	0.403558	high	157	0.748101	0.724234
low	158	0.5171082019805908	-3.53843	low	158	0.496923	0.403558	high	158	0.748101	0.724234
low	159	0.5171082019805908	-3.53843	low	159	0.496923	0.403558	high	159	0.748101	0.724234
low	0	0	-2.5683	low	0	0.434442	0.34098	low	0	0.270506	0.371125
low	1	0	-2.5683	low	1	0.434442	0.34098	low	1	0.270506	0.371125
low	2	0	-2.5683	low	2	0.434442	0.34098	low	2	0.270506	0.371125
low	3	0	-2.5683	low	3	0.434442	0.34098	low	3	0.270506	0.371125
low	4	0	-2.5683	low	4	0.434442	0.34098	low	4	0.270506	0.371125
low	5	0	-2.5683	low	5	0.434442	0.34098	low	5	0.270506	0.371125
low	6	0	-2.5683	low	6	0.434442	0.34098	low	6	0.270506	0.371125
low	7	0	-2.5683	low	7	0.434442	0.34098	low	7	0.270506	0.371125
low	8	0	-2.5683	low	8	0.434442	0.34098	low	8	0.270506	0.371125
low	9	0	-2.5683	low	9	0.434442	0.34098	low	9	0.270506	0.371125
low	10	0	-2.5683	low	10	0.434442	0.34098	low	10	0.270506	0.371125
low	11	0	-2.5683	low	11	0.434442	0.34098	low	11	0.270506	0.371125
low	12	0	-2.5683	low	12	0.434442	0.34098	low	12	0.270506	0.371125
low	13	0	-2.5683	low	13	0.434442	0.34098	low	13	0.270506	0.371125
low	14	0	-2.5683	low	14	0.434442	0.34098	low	14	0.270506	0.371125
low	15	0	-2.5683	low	15	0.434442	0.34098	low	15	0.270506	0.371125
low	16	0	-2.5683	low	16	0.440163	0.34098	low	16	0.276615	0.371125
low	17	0	-2.5683	low	17	0.451607	0.34098	low	17	0.288832	0.371125
low	18	0	-2.5683	low	18	0.46305	0.34098	low	18	0.30105	0.371125
low	19	0	-2.5683	low	19	0.474494	0.34098	low	19	0.313269	0.371125
low	20	0	-2.5683	low	20	0.485937	0.34098	low	20	0.325487	0.371125
low	21	0	-2.5683	low	21	0.497381	0.34098	low	21	0.337706	0.371125
low	22	0	-2.5683	low	22	0.508825	0.34098	low	22	0.349924	0.371125
low	23	0	-2.5683	low	23	0.52027	0.34098	low	23	0.362143	0.371125
low	24	0	-2.5683	low	24	0.531714	0.34098	low	24	0.374363	0.371125
low	25	0	-2.5683	low	25	0.543159	0.34098	low	25	0.386582	0.371125
low	26	0	-2.5683	low	26	0.554604	0.34098	low	26	0.398802	0.371125
low	27	0	-2.5683	low	27	0.56605	0.34098	low	27	0.411021	0.371125
low	28	0	-2.5683	low	28	0.577495	0.34098	low	28	0.423241	0.371125
low	29	0	-2.5683	low	29	0.588941	0.34098	low	29	0.435461	0.371125
low	30	0	-2.5683	low	30	0.600387	0.34098	low	30	0.447681	0.371125
low	31	0	-2.5683	low	31	0.611833	0.34098	low	31	0.459901	0.371125
low	32	0	-2.5683	low	32	0.623279	0.34098	low	32	0.472121	0.371125
low	33	0	-2.5683	low	33	0.634725	0.34098	low	33	0.484342	0.371125
low	34	0	-2.5683	low	34	0.646171	0.34098	low	34	0.496562	0.371125
low	35	0	-2.5683	low	35	0.657618	0.34098	low	35	0.508782	0.371125
low	36	0	-2.5683	low	36	0.669065	0.34098	low	36	0.521003	0.371125
low	37	0	-2.5683	low	37	0.680511	0.34098	low	37	0.533223	0.371125
low	38	0	-2.5683	low	38	0.691958	0.34098	low	38	0.545444	0.371125
low	39	0	-2.5683	low	39	0.703405	0.34098	low	39	0.557665	0.371125
low	40	0	-2.5683	low	40	0.714852	0.34098	low	40	0.569885	0.371125
low	41	0	-2.5683	low	41	0.726299	0.34098	low	41	0.582106	0.371125
low	42	0	-2.5683	low	42	0.737746	0.34098	low	42	0.594327	0.371125
low	43	0	-2.5683	low	43	0.749194	0.34098	low	43	0.606548	0.371125
low	44	0	-2.5683	low	44	0.760641	0.34098	low	44	0.618769	0.371125
low	45	0	-2.5683	low	45	0.772089	0.34098	low	45	0.63099	0.371125
low	46	0	-2.5683	low	46	0.783537	0.34098	low	46	0.643211	0.371125
low	47	0	-2.5683	low	47	0.794984	0.34098	low	47	0.655432	0.371125
low	48	0.013301858678460121	-2.5683	low	48	0.801849	0.34098	low	48	0.665675	0.371125
low	49	0.039905570447444916	-2.5683	low	49	0.804132	0.34098	low	49	0.67394	0.371125
low	50	0.0665093	-2.5683	low	50	0.806416	0.34098	low	50	0.682206	0.371125
low	51	0.093113	-2.5683	low	51	0.808699	0.34098	low	51	0.690472	0.371125
low	52	0.11971671879291534	-2.5683	low	52	0.810983	0.34098	low	52	0.698738	0.371125
low	53	0.1463204324245453	-2.5683	low	53	0.813267	0.34098	low	53	0.707005	0.371125
low	54	0.17292413115501404	-2.5683	low	54	0.815551	0.34098	low	54	0.715272	0.371125
low	55	0.19952785968780518	-2.5683	low	55	0.817836	0.34098	low	55	0.72354	0.371125
low	56	0.2261315882205963	-2.5683	low	56	0.820122	0.34098	low	56	0.731807	0.371125
low	57	0.25273528695106506	-2.5683	low	57	0.822407	0.34098	low	57	0.740075	0.371125
low	58	0.2793390154838562	-2.5683	low	58	0.824693	0.34098	low	58	0.748343	0.371125
low	59	0.30594271421432495	-2.5683	low	59	0.826978	0.34098	low	59	0.756612	0.371125
low	60	0.3325464129447937	-2.5683	low	60	0.829264	0.34098	low	60	0.76488	0.371125
low	61	0.35915014147758484	-2.5683	low	61	0.831551	0.34098	low	61	0.773149	0.371125
low	62	0.385754	-2.5683	low	62	0.833838	0.34098	low	62	0.781419	0.371125
low	63	0.4123575687408447	-2.5683	low	63	0.836125	0.34098	low	63	0.789688	0.371125
low	64	0.4389612674713135	-2.5683	low	64	0.838413	0.34098	low	64	0.797958	0.371125
low	65	0.465565	-2.5683	low	65	0.840702	0.34098	low	65	0.806228	0.371125
low	66	0.49216875433921814	-2.5683	low	66	0.842991	0.34098	low	66	0.814498	0.371125
low	67	0.5187724828720093	-2.5683	low	67	0.84528	0.34098	low	67	0.822769	0.371125
low	68	0.545376	-2.5683	low	68	0.847569	0.34098	low	68	0.83104	0.371125
low	69	0.5719798803329468	-2.5683	low	69	0.849859	0.34098	low	69	0.839311	0.371125
low	70	0.5985835790634155	-2.5683	low	70	0.852149	0.34098	low	70	0.847582	0.371125
low	71	0.6251872777938843	-2.5683	low	71	0.854439	0.34098	low	71	0.855854	0.371125
low	72	0.651791	-2.5683	low	72	0.85673	0.34098	low	72	0.864126	0.371125
low	73	0.6783946752548218	-2.5683	low	73	0.85902	0.34098	low	73	0.872397	0.371125
low	74	0.7049984931945801	-2.5683	low	74	0.861311	0.34098	low	74	0.880669	0.371125
low	75	0.7316021919250488	-2.5683	low	75	0.863602	0.34098	low	75	0.888942	0.371125
low	76	0.7582058906555176	-2.5683	low	76	0.865893	0.34098	low	76	0.897214	0.371125
low	77	0.7848095893859863	-2.5683	low	77	0.868185	0.34098	low	77	0.905487	0.371125
low	78	0.8114134073257446	-2.5683	low	78	0.870477	0.34098	low	78	0.91376	0.371125
low	79	0.8380169868469238	-2.5683	low	79	0.872769	0.34098	low	79	0.922033	0.371125
low	80	0.845151	-2.5683	low	80	0.869238	0.34098	low	80	0.92486	0.371125
low	81	0.834089	-2.5683	low	81	0.859884	0.34098	low	81	0.92224	0.371125
low	82	0.8225916028022766	-2.5683	low	82	0.850531	0.34098	low	82	0.919621	0.371125
low	83	0.8114822506904602	-2.5683	low	83	0.841177	0.34098	low	83	0.917001	0.371125
low	84	0.8003528714179993	-2.5683	low	84	0.831824	0.34098	low	84	0.914382	0.371125
low	85	0.7893542051315308	-2.5683	low	85	0.822471	0.34098	low	85	0.911763	0.371125
low	86	0.7784975171089172	-2.5683	low	86	0.813118	0.34098	low	86	0.909144	0.371125
low	87	0.7677085399627686	-2.5683	low	87	0.803766	0.34098	low	87	0.906526	0.371125
low	88	0.7572437524795532	-2.5683	low	88	0.794414	0.34098	low	88	0.903907	0.371125
low	89	0.7468856573104858	-2.5683	low	89	0.785063	0.34098	low	89	0.901289	0.371125
low	90	0.738676	-2.5683	low	90	0.775712	0.34098	low	90	0.898671	0.371125
low	91	0.7310245633125305	-2.5683	low	91	0.766361	0.34098	low	91	0.896053	0.371125
low	92	0.7239078879356384	-2.5683	low	92	0.757011	0.34098	low	92	0.893435	0.371125
low	93	0.7171621918678284	-2.5683	low	93	0.74766	0.34098	low	93	0.890817	0.371125
low	94	0.710826	-2.5683	low	94	0.73831	0.34098	low	94	0.8882	0.371125
low	95	0.7048991322517395	-2.5683	low	95	0.72896	0.34098	low	95	0.885582	0.371125
low	96	0.6993623971939087	-2.5683	low	96	0.71961	0.34098	low	96	0.882965	0.371125
low	97	0.6942316293716431	-2.5683	low	97	0.710261	0.34098	low	97	0.880347	0.371125
low	98	0.6894869804382324	-2.5683	low	98	0.700911	0.34098	low	98	0.87773	0.371125
low	99	0.6850409507751465	-2.5683	low	99	0.691562	0.34098	low	99	0.875113	0.371125
low	100	0.6812136173248291	-2.5683	low	100	0.682214	0.34098	low	100	0.872496	0.371125
low	101	0.6777005195617676	-2.5683	low	101	0.672865	0.34098	low	101	0.86988	0.371125
low	102	0.6745911836624146	-2.5683	low	102	0.663517	0.34098	low	102	0.867263	0.371125
low	103	0.6716601848602295	-2.5683	low	103	0.654169	0.34098	low	103	0.864648	0.371125
low	104	0.6693830490112305	-2.5683	low	104	0.644821	0.34098	low	104	0.862032	0.371125
low	105	0.6668723821640015	-2.5683	low	105	0.635474	0.34098	low	105	0.859417	0.371125
low	106	0.6645638346672058	-2.5683	low	106	0.626127	0.34098	low	106	0.856802	0.371125
low	107	0.6622092127799988	-2.5683	low	107	0.616781	0.34098	low	107	0.854187	0.371125
low	108	0.6598845720291138	-2.5683	low	108	0.607436	0.34098	low	108	0.851572	0.371125
low	109	0.6575812697410583	-2.5683	low	109	0.598091	0.34098	low	109	0.848957	0.371125
low	110	0.6549916863441467	-2.5683	low	110	0.588748	0.34098	low	110	0.846343	0.371125
low	111	0.6523493528366089	-2.5683	low	111	0.579406	0.34098	low	111	0.843728	0.371125
low	112	0.6448959708213806	-2.5683	low	112	0.569101	0.34098	low	112	0.836365	0.371125
low	113	0.6320558190345764	-2.5683	low	113	0.557834	0.34098	low	113	0.824254	0.371125
low	114	0.6190021634101868	-2.5683	low	114	0.546567	0.34098	low	114	0.812142	0.371125
low	115	0.605843	-2.5683	low	115	0.5353	0.34098	low	115	0.80003	0.371125
low	116	0.5926852226257324	-2.5683	low	116	0.524034	0.34098	low	116	0.787919	0.371125
low	117	0.5795285105705261	-2.5683	low	117	0.512767	0.34098	low	117	0.775807	0.371125
low	118	0.5663743019104004	-2.5683	low	118	0.5015	0.34098	low	118	0.763696	0.371125
low	119	0.5532413721084595	-2.5683	low	119	0.490234	0.34098	low	119	0.751584	0.371125
low	120	0.5401090383529663	-2.5683	low	120	0.478967	0.34098	low	120	0.739473	0.371125
low	121	0.5269780158996582	-2.5683	low	121	0.467701	0.34098	low	121	0.727361	0.371125
low	122	0.5138474702835083	-2.5683	low	122	0.456435	0.34098	low	122	0.71525	0.371125
low	123	0.5001141428947449	-2.5683	low	123	0.445169	0.34098	low	123	0.703139	0.371125
low	124	0.48726823925971985	-2.5683	low	124	0.433903	0.34098	low	124	0.691028	0.371125
low	125	0.4744788110256195	-2.5683	low	125	0.422637	0.34098	low	125	0.678916	0.371125
low	126	0.46103593707084656	-2.5683	low	126	0.411371	0.34098	low	126	0.666805	0.371125
low	127	0.4476480185985565	-2.5683	low	127	0.400105	0.34098	low	127	0.654694	0.371125
low	128	0.43459928035736084	-2.5683	low	128	0.38884	0.34098	low	128	0.642583	0.371125
low	129	0.42184	-2.5683	low	129	0.377574	0.34098	low	129	0.630472	0.371125
low	130	0.4089169502258301	-2.5683	low	130	0.366309	0.34098	low	130	0.618361	0.371125
low	131	0.39588409662246704	-2.5683	low	131	0.355044	0.34098	low	131	0.60625	0.371125
low	132	0.3827964961528778	-2.5683	low	132	0.34378	0.34098	low	132	0.594139	0.371125
low	133	0.36971110105514526	-2.5683	low	133	0.332495	0.34098	low	133	0.582029	0.371125
low	134	0.35662662982940674	-2.5683	low	134	0.321252	0.34098	low	134	0.569918	0.371125
low	135	0.3427167534828186	-2.5683	low	135	0.309989	0.34098	low	135	0.557808	0.371125
low	136	0.33048373460769653	-2.5683	low	136	0.298726	0.34098	low	136	0.545697	0.371125
low	137	0.31742244958877563	-2.5683	low	137	0.287464	0.34098	low	137	0.533587	0.371125
low	138	0.3043625056743622	-2.5683	low	138	0.276201	0.34098	low	138	0.521477	0.371125
low	139	0.29046109318733215	-2.5683	low	139	0.26494	0.34098	low	139	0.509366	0.371125
low	140	0.27774563431739807	-2.5683	low	140	0.253679	0.34098	low	140	0.497256	0.371125
low	141	0.2648089826107025	-2.5683	low	141	0.242418	0.34098	low	141	0.485146	0.371125
low	142	0.2520943880081177	-2.5683	low	142	0.231158	0.34098	low	142	0.473037	0.371125
low	143	0.23905028402805328	-2.5683	low	143	0.2199	0.34098	low	143	0.460927	0.371125
low	144	0.23241768777370453	-2.5683	low	144	0.214271	0.34098	low	144	0.454873	0.371125
low	145	0.23241768777370453	-2.5683	low	145	0.214271	0.34098	low	145	0.454873	0.371125
low	146	0.23241768777370453	-2.5683	low	146	0.214271	0.34098	low	146	0.454873	0.371125
low	147	0.23241768777370453	-2.5683	low	147	0.214271	0.34098	low	147	0.454873	0.371125
low	148	0.23241768777370453	-2.5683	low	148	0.214271	0.34098	low	148	0.454873	0.371125
low	149	0.23241768777370453	-2.5683	low	149	0.214271	0.34098	low	149	0.454873	0.371125
low	150	0.23241768777370453	-2.5683	low	150	0.214271	0.34098	low	150	0.454873	0.371125
low	151	0.23241768777370453	-2.5683	low	151	0.214271	0.34098	low	151	0.454873	0.371125
low	152	0.23241768777370453	-2.5683	low	152	0.214271	0.34098	low	152	0.454873	0.371125
low	153	0.23241768777370453	-2.5683	low	153	0.214271	0.34098	low	153	0.454873	0.371125
low	154	0.23241768777370453	-2.5683	low	154	0.214271	0.34098	low	154	0.454873	0.371125
low	155	0.23241768777370453	-2.5683	low	155	0.214271	0.34098	low	155	0.454873	0.371125
low	156	0.23241768777370453	-2.5683	low	156	0.214271	0.34098	low	156	0.454873	0.371125
low	157	0.23241768777370453	-2.5683	low	157	0.214271	0.34098	low	157	0.454873	0.371125
low	158	0.23241768777370453	-2.5683	low	158	0.214271	0.34098	low	158	0.454873	0.371125
low	159	0.23241768777370453	-2.5683	low	159	0.214271	0.34098	low	159	0.454873	0.371125
high	0	0.5692596435546875	-2.29584	low	0	0.351731	0.218101	high	0	0.487034	0.905619
high	1	0.5692596435546875	-2.29584	low	1	0.351731	0.218101	high	1	0.487034	0.905619
high	2	0.5692596435546875	-2.29584	low	2	0.351731	0.218101	high	2	0.487034	0.905619
high	3	0.5692596435546875	-2.29584	low	3	0.351731	0.218101	high	3	0.487034	0.905619
high	4	0.5692596435546875	-2.29584	low	4	0.351731	0.218101	high	4	0.487034	0.905619
high	5	0.5692596435546875	-2.29584	low	5	0.351731	0.218101	high	5	0.487034	0.905619
high	6	0.5692596435546875	-2.29584	low	6	0.351731	0.218101	high	6	0.487034	0.905619
high	7	0.5692596435546875	-2.29584	low	7	0.351731	0.218101	high	7	0.487034	0.905619
high	8	0.5692596435546875	-2.29584	low	8	0.351731	0.218101	high	8	0.487034	0.905619
high	9	0.5692596435546875	-2.29584	low	9	0.351731	0.218101	high	9	0.487034	0.905619
high	10	0.5692596435546875	-2.29584	low	10	0.351731	0.218101	high	10	0.487034	0.905619
high	11	0.5692596435546875	-2.29584	low	11	0.351731	0.218101	high	11	0.487034	0.905619
high	12	0.5692596435546875	-2.29584	low	12	0.351731	0.218101	high	12	0.487034	0.905619
high	13	0.5692596435546875	-2.29584	low	13	0.351731	0.218101	high	13	0.487034	0.905619
high	14	0.5692596435546875	-2.29584	low	14	0.351731	0.218101	high	14	0.487034	0.905619
high	15	0.5692596435546875	-2.29584	low	15	0.351731	0.218101	high	15	0.487034	0.905619
high	16	0.5746413469314575	-2.29584	low	16	0.357179	0.218101	high	16	0.494044	0.905619
high	17	0.5853875875473022	-2.29584	low	17	0.368076	0.218101	high	17	0.508088	0.905619
high	18	0.5961719155311584	-2.29584	low	18	0.378973	0.218101	high	18	0.522161	0.905619
high	19	0.6069382429122925	-2.29584	low	19	0.38987	0.218101	high	19	0.536263	0.905619
high	20	0.6177051067352295	-2.29584	low	20	0.400767	0.218101	high	20	0.550391	0.905619
high	21	0.6284726858139038	-2.29584	low	21	0.411665	0.218101	high	21	0.564547	0.905619
high	22	0.6392413377761841	-2.29584	low	22	0.422562	0.218101	high	22	0.578715	0.905619
high	23	0.6500113606452942	-2.29584	low	23	0.43346	0.218101	high	23	0.592925	0.905619
high	24	0.6607823371887207	-2.29584	low	24	0.444358	0.218101	high	24	0.607146	0.905619
high	25	0.6715540885925293	-2.29584	low	25	0.455256	0.218101	high	25	0.621387	0.905619
high	26	0.6823267340660095	-2.29584	low	26	0.466154	0.218101	high	26	0.63565	0.905619
high	27	0.6931001543998718	-2.29584	low	27	0.477052	0.218101	high	27	0.64993	0.905619
high	28	0.7038745284080505	-2.29584	low	28	0.48795	0.218101	high	28	0.66423	0.905619
high	29	0.7146496772766113	-2.29584	low	29	0.498849	0.218101	high	29	0.678549	0.905619
high	30	0.7254260778427124	-2.29584	low	30	0.509747	0.218101	high	30	0.692883	0.905619
high	31	0.7362035512924194	-2.29584	low	31	0.520646	0.218101	high	31	0.707234	0.905619
high	32	0.7469815611839294	-2.29584	low	32	0.531545	0.218101	high	32	0.721598	0.905619
high	33	0.7577604055404663	-2.29584	low	33	0.542443	0.218101	high	33	0.735976	0.905619
high	34	0.7685396075248718	-2.29584	low	34	0.553342	0.218101	high	34	0.750368	0.905619
high	35	0.7793193459510803	-2.29584	low	35	0.564241	0.218101	high	35	0.76477	0.905619
high	36	0.7900997400283813	-2.29584	low	36	0.57514	0.218101	high	36	0.779183	0.905619
high	37	0.8008806109428406	-2.29584	low	37	0.586038	0.218101	high	37	0.793608	0.905619
high	38	0.8116620182991028	-2.29584	low	38	0.596937	0.218101	high	38	0.808044	0.905619
high	39	0.822444	-2.29584	low	39	0.60781	0.218101	high	39	0.822492	0.905619
high	40	0.833226	-2.29584	low	40	0.618735	0.218101	high	40	0.836949	0.905619
high	41	0.8440085649490356	-2.29584	low	41	0.629634	0.218101	high	41	0.851414	0.905619
high	42	0.8547912836074829	-2.29584	low	42	0.640533	0.218101	high	42	0.865891	0.905619
high	43	0.8655742406845093	-2.29584	low	43	0.651432	0.218101	high	43	0.880378	0.905619
high	44	0.8763574361801147	-2.29584	low	44	0.662331	0.218101	high	44	0.89487	0.905619
high	45	0.8871410489082336	-2.29584	low	45	0.673231	0.218101	high	45	0.90937	0.905619
high	46	0.8979251980781555	-2.29584	low	46	0.68413	0.218101	high	46	0.923876	0.905619
high	47	0.9087093472480774	-2.29584	low	47	0.695029	0.218101	high	47	0.93839	0.905619
high	48	0.9107235670089722	-2.29584	low	48	0.703692	0.218101	high	48	0.942685	0.905619
high	49	0.9039756655693054	-2.29584	low	49	0.71012	0.218101	high	49	0.936772	0.905619
high	50	0.8972402811050415	-2.29584	low	50	0.716548	0.218101	high	50	0.930883	0.905619
high	51	0.8905125856399536	-2.29584	low	51	0.722976	0.218101	high	51	0.925017	0.905619
high	52	0.8837913274765015	-2.29584	low	52	0.729405	0.218101	high	52	0.919175	0.905619
high	53	0.8770755529403687	-2.29584	low	53	0.735834	0.218101	high	53	0.913359	0.905619
high	54	0.8703650236129761	-2.29584	low	54	0.742263	0.218101	high	54	0.907566	0.905619
high	55	0.8636595606803894	-2.29584	low	55	0.748692	0.218101	high	55	0.901799	0.905619
high	56	0.8569616079330444	-2.29584	low	56	0.755121	0.218101	high	56	0.896053	0.905619
high	57	0.8502700924873352	-2.29584	low	57	0.761551	0.218101	high	57	0.890324	0.905619
high	58	0.8435907363891602	-2.29584	low	58	0.76798	0.218101	high	58	0.884615	0.905619
high	59	0.8369205594062805	-2.29584	low	59	0.77441	0.218101	high	59	0.878924	0.905619
high	60	0.830259	-2.29584	low	60	0.78084	0.218101	high	60	0.873245	0.905619
high	61	0.8236017227172852	-2.29584	low	61	0.78727	0.218101	high	61	0.867582	0.905619
high	62	0.8169506192207336	-2.29584	low	62	0.7937	0.218101	high	62	0.861933	0.905619
high	63	0.8103066682815552	-2.29584	low	63	0.80013	0.218101	high	63	0.856296	0.905619
high	64	0.8036708831787109	-2.29584	low	64	0.806561	0.218101	high	64	0.850674	0.905619
high	65	0.7970441579818726	-2.29584	low	65	0.812991	0.218101	high	65	0.845068	0.905619
high	66	0.7904313802719116	-2.29584	low	66	0.819422	0.218101	high	66	0.839478	0.905619
high	67	0.7838279008865356	-2.29584	low	67	0.825853	0.218101	high	67	0.833903	0.905619
high	68	0.7772290110588074	-2.29584	low	68	0.832284	0.218101	high	68	0.828345	0.905619
high	69	0.770639	-2.29584	low	69	0.838716	0.218101	high	69	0.822799	0.905619
high	70	0.7640548348426819	-2.29584	low	70	0.845147	0.218101	high	70	0.817268	0.905619
high	71	0.7574755549430847	-2.29584	low	71	0.851579	0.218101	high	71	0.81175	0.905619
high	72	0.7509037852287292	-2.29584	low	72	0.858012	0.218101	high	72	0.806245	0.905619
high	73	0.7443472146987915	-2.29584	low	73	0.864445	0.218101	high	73	0.800753	0.905619
high	74	0.7378050684928894	-2.29584	low	74	0.870878	0.218101	high	74	0.795265	0.905619
high	75	0.7312698364257812	-2.29584	low	75	0.877311	0.218101	high	75	0.789796	0.905619
high	76	0.7247415781021118	-2.29584	low	76	0.883744	0.218101	high	76	0.784345	0.905619
high	77	0.7182198762893677	-2.29584	low	77	0.890178	0.218101	high	77	0.7789	0.905619
high	78	0.711706	-2.29584	low	78	0.896611	0.218101	high	78	0.773472	0.905619
high	79	0.7051990628242493	-2.29584	low	79	0.903045	0.218101	high	79	0.768057	0.905619
high	80	0.7036368250846863	-2.29584	low	80	0.904575	0.218101	high	80	0.765947	0.905619
high	81	0.7070107460021973	-2.29584	low	81	0.901202	0.218101	high	81	0.767137	0.905619
high	82	0.7103855013847351	-2.29584	low	82	0.897829	0.218101	high	82	0.768328	0.905619
high	83	0.7137612104415894	-2.29584	low	83	0.894456	0.218101	high	83	0.76952	0.905619
high	84	0.7171379923820496	-2.29584	low	84	0.891083	0.218101	high	84	0.770713	0.905619
high	85	0.7205156087875366	-2.29584	low	85	0.88771	0.218101	high	85	0.771908	0.905619
high	86	0.7238941192626953	-2.29584	low	86	0.884338	0.218101	high	86	0.773104	0.905619
high	87	0.7272728085517883	-2.29584	low	87	0.880965	0.218101	high	87	0.774301	0.905619
high	88	0.7306520938873291	-2.29584	low	88	0.877592	0.218101	high	88	0.7755	0.905619
high	89	0.7340317964553833	-2.29584	low	89	0.874219	0.218101	high	89	0.776699	0.905619
high	90	0.7374123334884644	-2.29584	low	90	0.870847	0.218101	high	90	0.777899	0.905619
high	91	0.7407941818237305	-2.29584	low	91	0.867474	0.218101	high	91	0.779101	0.905619
high	92	0.7441770434379578	-2.29584	low	92	0.864102	0.218101	high	92	0.780304	0.905619
high	93	0.7475603222846985	-2.29584	low	93	0.860729	0.218101	high	93	0.781507	0.905619
high	94	0.7509441375732422	-2.29584	low	94	0.857356	0.218101	high	94	0.782712	0.905619
high	95	0.7543283700942993	-2.29584	low	95	0.853984	0.218101	high	95	0.783918	0.905619
high	96	0.7577131390571594	-2.29584	low	96	0.850612	0.218101	high	96	0.785126	0.905619
high	97	0.761098	-2.29584	low	97	0.847239	0.218101	high	97	0.786336	0.905619
high	98	0.7644841074943542	-2.29584	low	98	0.843867	0.218101	high	98	0.787548	0.905619
high	99	0.7678705453872681	-2.29584	low	99	0.840495	0.218101	high	99	0.78876	0.905619
high	100	0.7712573409080505	-2.29584	low	100	0.837123	0.218101	high	100	0.789975	0.905619
high	101	0.7746449112892151	-2.29584	low	101	0.833751	0.218101	high	101	0.79119	0.905619
high	102	0.7780324816703796	-2.29584	low	102	0.830379	0.218101	high	102	0.792407	0.905619
high	103	0.7814205884933472	-2.29584	low	103	0.827008	0.218101	high	103	0.793625	0.905619
high	104	0.7848089933395386	-2.29584	low	104	0.823636	0.218101	high	104	0.794845	0.905619
high	105	0.7881975173950195	-2.29584	low	105	0.820265	0.218101	high	105	0.796066	0.905619
high	106	0.7915865182876587	-2.29584	low	106	0.816894	0.218101	high	106	0.797288	0.905619
high	107	0.7949765920639038	-2.29584	low	107	0.813523	0.218101	high	107	0.798512	0.905619
high	108	0.7983673214912415	-2.29584	low	108	0.810153	0.218101	high	108	0.799737	0.905619
high	109	0.8017584085464478	-2.29584	low	109	0.806783	0.218101	high	109	0.800963	0.905619
high	110	0.8051496744155884	-2.29584	low	110	0.803413	0.218101	high	110	0.80219	0.905619
high	111	0.8085414171218872	-2.29584	low	111	0.800043	0.218101	high	111	0.803392	0.905619
high	112	0.8052608370780945	-2.29584	low	112	0.792485	0.218101	high	112	0.799457	0.905619
high	113	0.7953075170516968	-2.29584	low	113	0.78074	0.218101	high	113	0.790307	0.905619
high	114	0.785354	-2.29584	low	114	0.768995	0.218101	high	114	0.781158	0.905619
high	115	0.7754016518592834	-2.29584	low	115	0.75725	0.218101	high	115	0.772009	0.905619
high	116	0.7654488682746887	-2.29584	low	116	0.745504	0.218101	high	116	0.76286	0.905619
high	117	0.7554960250854492	-2.29584	low	117	0.733759	0.218101	high	117	0.753712	0.905619
high	118	0.7455434799194336	-2.29584	low	118	0.722014	0.218101	high	118	0.744564	0.905619
high	119	0.7355910539627075	-2.29584	low	119	0.710269	0.218101	high	119	0.735416	0.905619
high	120	0.7256390452384949	-2.29584	low	120	0.698524	0.218101	high	120	0.726268	0.905619
high	121	0.7156873941421509	-2.29584	low	121	0.686778	0.218101	high	121	0.71712	0.905619
high	122	0.7057360410690308	-2.29584	low	122	0.675033	0.218101	high	122	0.707972	0.905619
high	123	0.6957849264144897	-2.29584	low	123	0.663288	0.218101	high	123	0.698826	0.905619
high	124	0.6858339905738831	-2.29584	low	124	0.651543	0.218101	high	124	0.689679	0.905619
high	125	0.6758832931518555	-2.29584	low	125	0.639798	0.218101	high	125	0.680533	0.905619
high	126	0.6659331321716309	-2.29584	low	126	0.628052	0.218101	high	126	0.671387	0.905619
high	127	0.655983	-2.29584	low	127	0.616307	0.218101	high	127	0.662242	0.905619
high	128	0.6460334062576294	-2.29584	low	128	0.604562	0.218101	high	128	0.653097	0.905619
high	129	0.6360843181610107	-2.29584	low	129	0.592817	0.218101	high	129	0.643953	0.905619
high	130	0.6261359453201294	-2.29584	low	130	0.581072	0.218101	high	130	0.634809	0.905619
high	131	0.6161879897117615	-2.29584	low	131	0.569326	0.218101	high	131	0.625645	0.905619
high	132	0.6062403917312622	-2.29584	low	132	0.557581	0.218101	high	132	0.616525	0.905619
high	133	0.5962933301925659	-2.29584	low	133	0.545836	0.218101	high	133	0.607383	0.905619
high	134	0.5863468050956726	-2.29584	low	134	0.534091	0.218101	high	134	0.598242	0.905619
high	135	0.5764015316963196	-2.29584	low	135	0.522346	0.218101	high	135	0.589101	0.905619
high	136	0.5664571523666382	-2.29584	low	136	0.510601	0.218101	high	136	0.57996	0.905619
high	137	0.5565131306648254	-2.29584	low	137	0.498856	0.218101	high	137	0.570821	0.905619
high	138	0.5465441346168518	-2.29584	low	138	0.48711	0.218101	high	138	0.561683	0.905619
high	139	0.5366256833076477	-2.29584	low	139	0.475365	0.218101	high	139	0.552545	0.905619
high	140	0.5266825556755066	-2.29584	low	140	0.4636	0.218101	high	140	0.543408	0.905619
high	141	0.5167403817176819	-2.29584	low	141	0.451875	0.218101	high	141	0.534271	0.905619
high	142	0.5067986249923706	-2.29584	low	142	0.44013	0.218101	high	142	0.525135	0.905619
high	143	0.49685755372047424	-2.29584	low	143	0.428385	0.218101	high	143	0.515999	0.905619
high	144	0.49188727140426636	-2.29584	low	144	0.422513	0.218101	high	144	0.511431	0.905619
high	145	0.49188727140426636	-2.29584	low	145	0.422513	0.218101	high	145	0.511431	0.905619
high	146	0.49188727140426636	-2.29584	low	146	0.422513	0.218101	high	146	0.511431	0.905619
high	147	0.49188727140426636	-2.29584	low	147	0.422513	0.218101	high	147	0.511431	0.905619
high	148	0.49188727140426636	-2.29584	low	148	0.422513	0.218101	high	148	0.511431	0.905619
high	149	0.49188727140426636	-2.29584	low	149	0.422513	0.218101	high	149	0.511431	0.905619
high	150	0.49188727140426636	-2.29584	low	150	0.422513	0.218101	high	150	0.511431	0.905619
high	151	0.49188727140426636	-2.29584	low	151	0.422513	0.218101	high	151	0.511431	0.905619
high	152	0.49188727140426636	-2.29584	low	152	0.422513	0.218101	high	152	0.511431	0.905619
high	153	0.49188727140426636	-2.29584	low	153	0.422513	0.218101	high	153	0.511431	0.905619
high	154	0.49188727140426636	-2.29584	low	154	0.422513	0.218101	high	154	0.511431	0.905619
high	155	0.49188727140426636	-2.29584	low	155	0.422513	0.218101	high	155	0.511431	0.905619
high	156	0.49188727140426636	-2.29584	low	156	0.422513	0.218101	high	156	0.511431	0.905619
high	157	0.49188727140426636	-2.29584	low	157	0.422513	0.218101	high	157	0.511431	0.905619
high	158	0.49188727140426636	-2.29584	low	158	0.422513	0.218101	high	158	0.511431	0.905619
high	159	0.49188727140426636	-2.29584	low	159	0.422513	0.218101	high	159	0.511431	0.905619
high	0	0.2590811252593994	-1.51571	low	0	0.574767	0.405066	high	0	0.571556	0.700358
high	1	0.2590811252593994	-1.51571	low	1	0.574767	0.405066	high	1	0.571556	0.700358
high	2	0.2590811252593994	-1.51571	low	2	0.574767	0.405066	high	2	0.571556	0.700358
high	3	0.2590811252593994	-1.51571	low	3	0.574767	0.405066	high	3	0.571556	0.700358
high	4	0.2590811252593994	-1.51571	low	4	0.574767	0.405066	high	4	0.571556	0.700358
high	5	0.2590811252593994	-1.51571	low	5	0.574767	0.405066	high	5	0.571556	0.700358
high	6	0.2590811252593994	-1.51571	low	6	0.574767	0.405066	high	6	0.571556	0.700358
high	7	0.2590811252593994	-1.51571	low	7	0.574767	0.405066	high	7	0.571556	0.700358
high	8	0.2590811252593994	-1.51571	low	8	0.574767	0.405066	high	8	0.571556	0.700358
high	9	0.2590811252593994	-1.51571	low	9	0.574767	0.405066	high	9	0.571556	0.700358
high	10	0.2590811252593994	-1.51571	low	10	0.574767	0.405066	high	10	0.571556	0.700358
high	11	0.2590811252593994	-1.51571	low	11	0.574767	0.405066	high	11	0.571556	0.700358
high	12	0.2590811252593994	-1.51571	low	12	0.574767	0.405066	high	12	0.571556	0.700358
high	13	0.2590811252593994	-1.51571	low	13	0.574767	0.405066	high	13	0.571556	0.700358
high	14	0.2590811252593994	-1.51571	low	14	0.574767	0.405066	high	14	0.571556	0.700358
high	15	0.2590811252593994	-1.51571	low	15	0.574767	0.405066	high	15	0.571556	0.700358
high	16	0.26549097895622253	-1.51571	low	16	0.580164	0.405066	high	16	0.576864	0.700358
high	17	0.2783161699771881	-1.51571	low	17	0.59096	0.405066	high	17	0.587479	0.700358
high	18	0.291147	-1.51571	low	18	0.601756	0.405066	high	18	0.598096	0.700358
high	19	0.3039795458316803	-1.51571	low	19	0.612553	0.405066	high	19	0.608712	0.700358
high	20	0.31681305170059204	-1.51571	low	20	0.62335	0.405066	high	20	0.61933	0.700358
high	21	0.32964712381362915	-1.51571	low	21	0.634147	0.405066	high	21	0.629947	0.700358
high	22	0.3424825072288513	-1.51571	low	22	0.644945	0.405066	high	22	0.640565	0.700358
high	23	0.3553200364112854	-1.51571	low	23	0.655744	0.405066	high	23	0.651183	0.700358
high	24	0.36816006898880005	-1.51571	low	24	0.666542	0.405066	high	24	0.661802	0.700358
high	25	0.38100308179855347	-1.51571	low	25	0.677341	0.405066	high	25	0.672422	0.700358
high	26	0.39384809136390686	-1.51571	low	26	0.688141	0.405066	high	26	0.683042	0.700358
high	27	0.4066951870918274	-1.51571	low	27	0.69894	0.405066	high	27	0.693663	0.700358
high	28	0.41954365372657776	-1.51571	low	28	0.70974	0.405066	high	28	0.704284	0.700358
high	29	0.43239355087280273	-1.51571	low	29	0.720541	0.405066	high	29	0.714906	0.700358
high	30	0.44524484872817993	-1.51571	low	30	0.731342	0.405066	high	30	0.725528	0.700358
high	31	0.4580971598625183	-1.51571	low	31	0.742143	0.405066	high	31	0.736151	0.700358
high	32	0.47094979882240295	-1.51571	low	32	0.752945	0.405066	high	32	0.746774	0.700358
high	33	0.4838026165962219	-1.51571	low	33	0.763747	0.405066	high	33	0.757398	0.700358
high	34	0.4966553747653961	-1.51571	low	34	0.774549	0.405066	high	34	0.768022	0.700358
high	35	0.5095083117485046	-1.51571	low	35	0.785351	0.405066	high	35	0.778646	0.700358
high	36	0.5223614573478699	-1.51571	low	36	0.796153	0.405066	high	36	0.78927	0.700358
high	37	0.5352149605751038	-1.51571	low	37	0.806956	0.405066	high	37	0.799895	0.700358
high	38	0.5480685234069824	-1.51571	low	38	0.817759	0.405066	high	38	0.81052	0.700358
high	39	0.5609223246574402	-1.51571	low	39	0.828562	0.405066	high	39	0.821145	0.700358
high	40	0.5737768411636353	-1.51571	low	40	0.839365	0.405066	high	40	0.83177	0.700358
high	41	0.5866318345069885	-1.51571	low	41	0.850169	0.405066	high	41	0.842396	0.700358
high	42	0.5994871854782104	-1.51571	low	42	0.860972	0.405066	high	42	0.853022	0.700358
high	43	0.6123429536819458	-1.51571	low	43	0.871776	0.405066	high	43	0.863649	0.700358
high	44	0.6251992583274841	-1.51571	low	44	0.882581	0.405066	high	44	0.874276	0.700358
high	45	0.6380557417869568	-1.51571	low	45	0.893385	0.405066	high	45	0.884903	0.700358
high	46	0.6509126424789429	-1.51571	low	46	0.904189	0.405066	high	46	0.895531	0.700358
high	47	0.6637699007987976	-1.51571	low	47	0.914994	0.405066	high	47	0.906159	0.700358
high	48	0.6744600534439087	-1.51571	low	48	0.919745	0.405066	high	48	0.908947	0.700358
high	49	0.682983	-1.51571	low	49	0.918444	0.405066	high	49	0.903897	0.700358
high	50	0.6915079951286316	-1.51571	low	50	0.917143	0.405066	high	50	0.898848	0.700358
high	51	0.7000340819358826	-1.51571	low	51	0.915842	0.405066	high	51	0.893803	0.700358
high	52	0.7085612416267395	-1.51571	low	52	0.914542	0.405066	high	52	0.88876	0.700358
high	53	0.7170893549919128	-1.51571	low	53	0.913242	0.405066	high	53	0.88372	0.700358
high	54	0.7256178855895996	-1.51571	low	54	0.911942	0.405066	high	54	0.878681	0.700358
high	55	0.7341472506523132	-1.51571	low	55	0.910643	0.405066	high	55	0.873647	0.700358
high	56	0.7426775097846985	-1.51571	low	56	0.909344	0.405066	high	56	0.868616	0.700358
high	57	0.7512079477310181	-1.51571	low	57	0.908011	0.405066	high	57	0.863587	0.700358
high	58	0.7597387433052063	-1.51571	low	58	0.906747	0.405066	high	58	0.858561	0.700358
high	59	0.7682701945304871	-1.51571	low	59	0.905449	0.405066	high	59	0.85354	0.700358
high	60	0.776802	-1.51571	low	60	0.904151	0.405066	high	60	0.848521	0.700358
high	61	0.7853342294692993	-1.51571	low	61	0.902854	0.405066	high	61	0.843503	0.700358
high	62	0.7938665151596069	-1.51571	low	62	0.901557	0.405066	high	62	0.838488	0.700358
high	63	0.8023990392684937	-1.51571	low	63	0.90026	0.405066	high	63	0.833475	0.700358
high	64	0.8109319806098938	-1.51571	low	64	0.898963	0.405066	high	64	0.828464	0.700358
high	65	0.8194656372070312	-1.51571	low	65	0.897667	0.405066	high	65	0.823456	0.700358
high	66	0.8279998898506165	-1.51571	low	66	0.896372	0.405066	high	66	0.81845	0.700358
high	67	0.8365343809127808	-1.51571	low	67	0.895077	0.405066	high	67	0.813447	0.700358
high	68	0.8450697064399719	-1.51571	low	68	0.893782	0.405066	high	68	0.808447	0.700358
high	69	0.8536052703857422	-1.51571	low	69	0.892487	0.405066	high	69	0.803448	0.700358
high	70	0.8621411323547363	-1.51571	low	70	0.891193	0.405066	high	70	0.798452	0.700358
high	71	0.8706773519515991	-1.51571	low	71	0.8899	0.405066	high	71	0.793459	0.700358
high	72	0.879214	-1.51571	low	72	0.888606	0.405066	high	72	0.788468	0.700358
high	73	0.8877506256103516	-1.51571	low	73	0.887313	0.405066	high	73	0.78348	0.700358
high	74	0.896288	-1.51571	low	74	0.886021	0.405066	high	74	0.778497	0.700358
high	75	0.9048252105712891	-1.51571	low	75	0.884728	0.405066	high	75	0.773516	0.700358
high	76	0.913363	-1.51571	low	76	0.883437	0.405066	high	76	0.768536	0.700358
high	77	0.9219009280204773	-1.51571	low	77	0.882145	0.405066	high	77	0.76356	0.700358
[truncated: 154,802 more rows]

## Sheet: fig.6(a)
ID	risk_score	event	prim_cat	age_cat	fh_cat	t_cat	n_cat	yt_cat	yn_cat	tumor_cat	er_cat	pr_cat	her2_cat	neo_rad	adj_rad	neo_chemo	adj_chemo	neo_endo	adj_endo	neo_her2	adj_her2	risk_group_idx
1	0.130357	0	Surgery	<= 50	Yes	0	0	0	Missing	Others	Missing	Missing	Missing	0	0	0	0	0	0	0	0	0
2	0.272433	0	Surgery	> 50	No	1	0	1	1	Invasive ductal carcinoma	Negative	Negative	Negative	0	1	0	0	0	0	0	0	0
3	0.616817	1	Neoadjuvant	> 50	No	0	3	Missing	3	Invasive ductal carcinoma	Positive	Positive	Positive	0	1	0	0	0	1	0	0	1
4	0.243019	0	Surgery	> 50	No	1	0	1	0	Invasive ductal carcinoma	Negative	Positive	Negative	0	1	0	0	0	0	0	0	0
5	0.0392587	0	Surgery	> 50	Yes	0	0	0	0	Others	Missing	Missing	Missing	0	1	0	0	0	0	0	0	0
6	0.165557	0	Surgery	<= 50	Yes	1	0	1	1	Invasive ductal carcinoma	Negative	Negative	Negative	0	1	0	0	0	1	0	0	0
7	0.0481032	0	Surgery	> 50	Yes	0	0	0	0	Others	Missing	Missing	Missing	0	0	0	0	0	0	0	0	0
8	0.331318	1	Surgery	> 50	No	1	0	1	0	Invasive ductal carcinoma	Negative	Negative	Negative	0	0	0	0	0	0	0	0	0
9	0.134792	0	Surgery	> 50	No	0	0	0	Missing	Others	Missing	Missing	Missing	0	1	0	0	0	0	0	0	0
10	0.654265	1	Surgery	<= 50	No	2	0	2	1	Invasive ductal carcinoma	Positive	Positive	Negative	0	1	0	1	0	1	0	0	1
11	0.186396	1	Surgery	> 50	No	1	0	2	0	Others	Positive	Positive	Negative	0	1	0	0	0	1	0	0	0
12	0.505332	0	Neoadjuvant	> 50	No	2	0	1	Missing	Invasive ductal carcinoma	Positive	Positive	Positive	0	1	0	0	0	0	0	0	1
13	0.605925	0	Neoadjuvant	<= 50	No	Missing	0	1	1	Invasive ductal carcinoma	Positive	Negative	Negative	0	0	0	0	1	0	0	0	1
14	0.436607	0	Neoadjuvant	<= 50	Yes	2	0	0	0	Invasive ductal carcinoma	Negative	Negative	Negative	0	0	1	0	0	0	0	0	1
15	0.179945	0	Surgery	<= 50	No	0	0	0	Missing	Others	Missing	Missing	Missing	0	0	0	0	0	0	0	0	0
16	0.202356	1	Surgery	<= 50	No	0	0	0	Missing	Others	Missing	Missing	Missing	0	0	0	0	0	0	0	0	0
17	0.089125	0	Surgery	<= 50	No	0	0	0	0	Others	Missing	Missing	Missing	0	0	0	0	0	0	0	0	0
18	0.491035	0	Surgery	> 50	No	2	0	2	0	Invasive ductal carcinoma	Positive	Positive	Negative	0	0	0	1	0	1	0	0	1
19	0.349669	0	Neoadjuvant	> 50	No	1	0	1	Missing	Invasive ductal carcinoma	Positive	Positive	Negative	1	0	0	0	0	1	0	0	0
20	0.384272	0	Surgery	> 50	No	1	0	1	0	Invasive ductal carcinoma	Positive	Positive	Positive	0	0	0	0	0	0	0	0	1
21	0.481006	0	Neoadjuvant	> 50	No	1	1	0	1	Invasive ductal carcinoma	Negative	Positive	Positive	0	1	0	0	0	0	0	0	1
22	0.307325	0	Neoadjuvant	<= 50	No	1	1	0	0	Invasive ductal carcinoma	Negative	Negative	Negative	0	1	1	0	0	0	0	0	0
23	0.307422	0	Neoadjuvant	<= 50	No	1	1	0	0	Invasive ductal carcinoma	Negative	Negative	Negative	0	1	1	0	0	0	0	0	0
24	0.213987	0	Surgery	> 50	No	1	0	1	0	Others	Negative	Positive	Positive	0	1	0	0	0	1	0	0	0
25	0.155142	0	Neoadjuvant	> 50	No	1	0	1	0	Others	Negative	Negative	Negative	0	1	0	0	0	0	0	0	0
26	0.428179	1	Surgery	<= 50	No	2	0	2	3	Invasive ductal carcinoma	Negative	Negative	Negative	0	1	0	1	0	1	0	0	1
27	0.282847	0	Neoadjuvant	> 50	No	1	0	2	1	Invasive ductal carcinoma	Negative	Positive	Negative	0	1	0	0	1	1	0	0	0
28	0.278475	0	Neoadjuvant	<= 50	Yes	1	0	1	Missing	Invasive ductal carcinoma	Negative	Negative	Negative	1	0	0	0	0	1	0	0	0
29	0.157943	0	Surgery	> 50	No	1	0	1	0	Others	Negative	Positive	Negative	0	0	0	0	0	0	0	0	0
30	0.516705	0	Neoadjuvant	<= 50	No	2	0	0	0	Invasive ductal carcinoma	Negative	Negative	Negative	0	0	1	0	0	0	0	0	1
31	0.195443	0	Surgery	> 50	No	1	0	1	0	Others	Positive	Positive	Positive	0	1	0	0	0	0	0	0	0
32	0.257536	0	Surgery	> 50	No	1	0	1	0	Invasive ductal carcinoma	Negative	Positive	Negative	0	0	0	0	0	0	0	0	0
33	0.752861	1	Neoadjuvant	> 50	No	2	1	1	Missing	Invasive ductal carcinoma	Positive	Positive	Negative	0	1	1	0	0	1	0	0	1
34	0.276437	0	Surgery	> 50	No	2	0	2	0	Invasive ductal carcinoma	Negative	Negative	Negative	0	1	0	0	0	1	0	0	0
35	0.577705	0	Surgery	> 50	No	3	0	1	0	Invasive ductal carcinoma	Positive	Negative	Positive	0	0	0	1	0	0	0	1	1
36	0.330608	0	Surgery	<= 50	No	Missing	0	1	0	Invasive ductal carcinoma	Positive	Positive	Positive	0	0	0	0	0	0	0	0	0
37	0.525123	1	Surgery	<= 50	No	2	0	1	0	Invasive lobular carcinoma	Positive	Positive	Negative	0	0	0	0	0	0	0	0	1
38	0.569634	0	Neoadjuvant	<= 50	No	1	1	1	0	Invasive ductal carcinoma	Positive	Positive	Positive	0	1	1	0	0	1	1	1	1
39	0.60345	0	Neoadjuvant	> 50	No	2	1	0	0	Invasive ductal carcinoma	Positive	Positive	Positive	0	1	1	0	0	0	1	1	1
40	0.571049	0	Surgery	> 50	No	2	0	1	1	Invasive ductal carcinoma	Positive	Positive	Positive	0	1	0	0	0	1	0	0	1
41	0.637865	1	Surgery	> 50	No	2	0	2	0	Invasive ductal carcinoma	Positive	Positive	Positive	0	1	0	1	0	1	0	0	1
42	0.429607	1	Surgery	<= 50	No	1	0	1	0	Invasive ductal carcinoma	Positive	Positive	Positive	0	0	0	1	0	1	0	0	1
43	0.27093	0	Surgery	> 50	No	0	0	0	0	Others	Missing	Missing	Missing	0	0	0	0	0	0	0	0	0
44	0.502148	0	Neoadjuvant	> 50	No	2	1	3	0	Others	Positive	Positive	Negative	0	1	1	0	0	1	0	0	1
45	0.283771	0	Neoadjuvant	<= 50	No	2	0	1	0	Invasive ductal carcinoma	Positive	Positive	Negative	0	1	1	0	0	1	0	0	0
46	0.236809	0	Surgery	> 50	No	1	0	1	0	Others	Positive	Positive	Positive	0	1	0	0	0	0	0	0	0
47	0.473413	0	Surgery	> 50	No	1	0	1	0	Invasive ductal carcinoma	Positive	Positive	Positive	0	1	0	0	0	1	0	0	1
48	0.0917167	0	Surgery	<= 50	No	0	0	0	0	Others	Missing	Missing	Missing	0	0	0	0	0	0	0	0	0
49	0.125882	0	Surgery	<= 50	Yes	0	0	0	Missing	Others	Missing	Missing	Missing	0	0	0	0	0	0	0	0	0
50	0.595182	0	Surgery	> 50	No	2	0	2	0	Invasive ductal carcinoma	Positive	Positive	Positive	0	1	0	1	0	1	0	0	1
51	0.708814	0	Neoadjuvant	> 50	No	2	1	0	0	Invasive ductal carcinoma	Positive	Positive	Positive	0	1	1	0	0	0	1	1	1
52	0.562043	1	Surgery	> 50	No	2	0	1	1	Invasive ductal carcinoma	Positive	Negative	Positive	0	1	0	1	0	1	0	0	1
53	0.357921	0	Surgery	> 50	No	1	0	1	0	Others	Positive	Positive	Negative	0	1	0	0	0	1	0	0	0
54	0.115492	0	Surgery	> 50	No	0	0	0	Missing	Others	Missing	Missing	Missing	0	1	0	0	0	0	0	0	0
55	0.743318	1	Neoadjuvant	<= 50	No	2	1	1	3	Invasive ductal carcinoma	Positive	Positive	Negative	0	1	1	0	0	1	0	0	1
56	0.88903	1	Neoadjuvant	> 50	No	2	1	2	3	Invasive ductal carcinoma	Positive	Positive	Negative	0	1	1	1	0	1	0	0	1
57	0.533409	0	Surgery	<= 50	No	2	0	2	1	Others	Positive	Positive	Positive	0	1	0	0	0	1	0	0	1
58	0.632268	0	Neoadjuvant	> 50	No	2	1	0	0	Invasive ductal carcinoma	Positive	Positive	Positive	0	1	1	0	0	0	1	1	1
59	0.279867	0	Surgery	> 50	Yes	0	0	0	0	Others	Missing	Missing	Missing	0	0	0	0	0	0	0	0	0
60	0.940666	1	Neoadjuvant	> 50	No	2	3	1	2	Invasive ductal carcinoma	Positive	Positive	Positive	0	1	1	0	0	1	0	0	1
[truncated: 920 more rows]

## Sheet: fig.6(b)
ID	risk_score	event	prim_cat	age_cat	fh_cat	t_cat	n_cat	yt_cat	yn_cat	tumor_cat	er_cat	pr_cat	her2_cat	neo_rad	adj_rad	neo_chemo	adj_chemo	neo_endo	adj_endo	neo_her2	adj_her2	risk_group_idx
[truncated: 892 more rows]

[truncated: 3 more sheets: fig.7, fig.S2, fig.S4]
